# Supplementary material
Source: publisher site journal article supplement (https://static.cambridge.org/content/id/urn:cambridge.org:id:article:S0001924020000597/resource/name/S0001924020000597supp001)
Supplement: Supplementary file 1 [file S0001924020000597supp001]

SyncTeX Version:1
Input:1:D:\이시훈\나의 논문, 발표\Aeronautical Journal\submission\Aeronautical_Journal_review.tex
Input:2:D:\이시훈\나의 논문, 발표\Aeronautical Journal\submission\aer.cls
Input:3:C:\Users\User\AppData\Local\Programs\MiKTeX 2.9\tex\latex\graphics\graphicx.sty
Input:4:C:\Users\User\AppData\Local\Programs\MiKTeX 2.9\tex\latex\graphics\keyval.sty
Input:5:C:\Users\User\AppData\Local\Programs\MiKTeX 2.9\tex\latex\graphics\graphics.sty
Input:6:C:\Users\User\AppData\Local\Programs\MiKTeX 2.9\tex\latex\graphics\trig.sty
Input:7:C:\Users\User\AppData\Local\Programs\MiKTeX 2.9\tex\latex\graphics-cfg\graphics.cfg
Input:8:C:\Users\User\AppData\Local\Programs\MiKTeX 2.9\tex\latex\graphics-def\pdftex.def
Input:9:C:\Users\User\AppData\Local\Programs\MiKTeX 2.9\tex\latex\amscls\amsthm.sty
Input:10:C:\Users\User\AppData\Local\Programs\MiKTeX 2.9\tex\latex\natbib\natbib.sty
Input:11:C:\Users\User\AppData\Local\Programs\MiKTeX 2.9\tex\latex\graphics\rotating.sty
Input:12:C:\Users\User\AppData\Local\Programs\MiKTeX 2.9\tex\latex\base\ifthen.sty
Input:13:C:\Users\User\AppData\Local\Programs\MiKTeX 2.9\tex\latex\amsmath\amsmath.sty
Input:14:C:\Users\User\AppData\Local\Programs\MiKTeX 2.9\tex\latex\amsmath\amstext.sty
Input:15:C:\Users\User\AppData\Local\Programs\MiKTeX 2.9\tex\latex\amsmath\amsgen.sty
Input:16:C:\Users\User\AppData\Local\Programs\MiKTeX 2.9\tex\latex\amsmath\amsbsy.sty
Input:17:C:\Users\User\AppData\Local\Programs\MiKTeX 2.9\tex\latex\amsmath\amsopn.sty
Input:18:C:\Users\User\AppData\Local\Programs\MiKTeX 2.9\tex\latex\caption\subcaption.sty
Input:19:C:\Users\User\AppData\Local\Programs\MiKTeX 2.9\tex\latex\caption\caption.sty
Input:20:C:\Users\User\AppData\Local\Programs\MiKTeX 2.9\tex\latex\caption\caption3.sty
Input:21:C:\Users\User\AppData\Local\Programs\MiKTeX 2.9\tex\latex\xcolor\xcolor.sty
Input:22:C:\Users\User\AppData\Local\Programs\MiKTeX 2.9\tex\latex\graphics-cfg\color.cfg
Input:23:C:\Users\User\AppData\Local\Programs\MiKTeX 2.9\tex\latex\txfonts\txfonts.sty
Input:24:C:\Users\User\AppData\Local\Programs\MiKTeX 2.9\tex\latex\makecell\makecell.sty
Input:25:C:\Users\User\AppData\Local\Programs\MiKTeX 2.9\tex\latex\tools\array.sty
Input:26:C:\Users\User\AppData\Local\Programs\MiKTeX 2.9\tex\latex\pbox\pbox.sty
Input:27:C:\Users\User\AppData\Local\Programs\MiKTeX 2.9\tex\latex\tools\calc.sty
Input:28:C:\Users\User\AppData\Local\Programs\MiKTeX 2.9\tex\latex\tools\tabularx.sty
Input:29:C:\Users\User\AppData\Local\Programs\MiKTeX 2.9\tex\latex\fourier\fourier.sty
Input:30:C:\Users\User\AppData\Local\Programs\MiKTeX 2.9\tex\generic\iftex\iftex.sty
Input:31:C:\Users\User\AppData\Local\Programs\MiKTeX 2.9\tex\latex\base\fontenc.sty
Input:32:C:\Users\User\AppData\Local\Programs\MiKTeX 2.9\tex\latex\fourier\t1futs.fd
Input:33:C:\Users\User\AppData\Local\Programs\MiKTeX 2.9\tex\latex\base\textcomp.sty
Input:34:C:\Users\User\AppData\Local\Programs\MiKTeX 2.9\tex\latex\fourier\fourier-orns.sty
Input:35:C:\Users\User\AppData\Local\Programs\MiKTeX 2.9\tex\latex\base\inputenc.sty
Input:36:C:\Users\User\AppData\Local\Programs\MiKTeX 2.9\tex\latex\l3backend\l3backend-pdfmode.def
Input:37:D:\이시훈\나의 논문, 발표\Aeronautical Journal\submission\Aeronautical_Journal_review.aux
Input:38:C:\Users\User\AppData\Local\Programs\MiKTeX 2.9\tex\latex\txfonts\omltxmi.fd
Input:39:C:\Users\User\AppData\Local\Programs\MiKTeX 2.9\tex\latex\txfonts\omstxsy.fd
Input:40:C:\Users\User\AppData\Local\Programs\MiKTeX 2.9\tex\latex\txfonts\omxtxex.fd
Input:41:C:\Users\User\AppData\Local\Programs\MiKTeX 2.9\tex\latex\txfonts\utxexa.fd
Input:42:C:\Users\User\AppData\Local\Programs\MiKTeX 2.9\tex\latex\fourier\fmlfutm.fd
Input:43:C:\Users\User\AppData\Local\Programs\MiKTeX 2.9\tex\latex\fourier\fmsfutm.fd
Input:44:C:\Users\User\AppData\Local\Programs\MiKTeX 2.9\tex\latex\fourier\fmxfutm.fd
Input:45:C:\Users\User\AppData\Local\Programs\MiKTeX 2.9\tex\context\base\mkii\supp-pdf.mkii
Input:46:C:\Users\User\AppData\Local\Programs\MiKTeX 2.9\tex\latex\epstopdf-pkg\epstopdf-base.sty
Input:47:C:\Users\User\AppData\Local\Programs\MiKTeX 2.9\tex\generic\infwarerr\infwarerr.sty
Input:48:C:\Users\User\AppData\Local\Programs\MiKTeX 2.9\tex\latex\grfext\grfext.sty
Input:49:C:\Users\User\AppData\Local\Programs\MiKTeX 2.9\tex\generic\kvdefinekeys\kvdefinekeys.sty
Input:50:C:\Users\User\AppData\Local\Programs\MiKTeX 2.9\tex\latex\kvoptions\kvoptions.sty
Input:51:C:\Users\User\AppData\Local\Programs\MiKTeX 2.9\tex\generic\ltxcmds\ltxcmds.sty
Input:52:C:\Users\User\AppData\Local\Programs\MiKTeX 2.9\tex\generic\kvsetkeys\kvsetkeys.sty
Input:53:C:\Users\User\AppData\Local\Programs\MiKTeX 2.9\tex\latex\pdftexcmds\pdftexcmds.sty
Input:54:C:\Users\User\AppData\Local\Programs\MiKTeX 2.9\tex\latex\txfonts\t1txss.fd
Input:55:C:\Users\User\AppData\Local\Programs\MiKTeX 2.9\tex\latex\fourier\ts1futs.fd
Output:pdf
Magnification:1000
Unit:1
X Offset:0
Y Offset:0
Content:
!4941
{1
[1,53:4736286,47115140:27525120,42378854,0
[1,53:7882014,47115140:24379392,41723494,0
[1,53:7882014,6178078:24379392,786432,0
(1,53:7882014,8045854:24379392,2654208,8486
(1,53:7882014,8045854:24379392,2654208,8486
[1,53:7882014,8045854:24379392,2654208,8486
(1,53:7882014,5457182:24379392,65536,0
h1,53:7882014,5457182:0,0,0
(1,53:7882014,5457182:24379392,65536,0
r1,53:32261406,5457182:24379392,65536,0
)
g1,53:32261406,5457182
g1,53:32261406,5457182
)
(1,53:7882014,6276382:24379392,395657,68796
x1,53:8974027,6276382
g1,53:9102903,6276382
x1,53:10132650,6276382
x1,53:11212210,6276382
x1,53:13046949,6276382
g1,53:13175825,6276382
x1,53:15509265,6276382
g1,53:16057146,6276382
g1,53:16605027,6276382
k1,53:31926452,6276382:15321425
x1,53:32261406,6276382
)
(1,53:7882014,6800670:24379392,65536,0
h1,53:7882014,6800670:0,0,0
(1,53:7882014,6800670:24379392,65536,0
r1,53:32261406,6800670:24379392,65536,0
)
g1,53:32261406,6800670
g1,53:32261406,6800670
)
(1,53:7882014,7521566:24379392,314703,103907
h1,53:7882014,7521566:0,0,0
x1,53:8135245,7521566
x1,53:8777037,7521566
g1,53:8871998,7521566
x1,53:9095868,7521566
g1,53:9190829,7521566
x1,53:9568840,7521566
g1,53:9663801,7521566
x1,53:10111541,7521566
h1,53:10111541,7521566:0,0,0
x1,53:10223476,7521566
g1,53:10341374,7521566
x1,53:10686814,7521566
g1,53:10781775,7521566
x1,53:11053356,7521566
x1,53:11288695,7521566
x1,53:11828186,7521566
g1,53:11923147,7521566
x1,53:12191058,7521566
x1,53:12569527,7521566
x1,53:14363702,7521566
g1,53:14458663,7521566
x1,53:14687121,7521566
x1,53:15833539,7521566
g1,53:15928500,7521566
x1,53:16823980,7521566
k1,53:32261406,7521566:15437426
g1,53:32261406,7521566
)
(1,53:7882014,8045854:24379392,314703,8486
h1,53:7882014,8045854:0,0,0
x1,53:8612804,8045854
g1,53:8730702,8045854
x1,53:10981790,8045854
x1,53:12299778,8045854
k1,53:32261406,8045854:19961628
g1,53:32261406,8045854
)
]
)
)
]
[1,53:7882014,44647710:24379392,36831232,0
h1,49:7882014,8471838:0,0,0
(1,49:7882014,11027742:24379392,1093018,22781
h1,49:7882014,11027742:0,0,0
x1,49:11369511,11027742
g1,49:11784902,11027742
x1,49:17264189,11027742
g1,49:17679580,11027742
x1,49:24570899,11027742
k1,49:32261406,11027742:7690507
)
(1,49:7882014,12797214:24379392,1093018,322750
x1,49:10372870,12797214
x1,49:15907438,12797214
g1,49:16322829,12797214
x1,49:19560793,12797214
x1,49:22446119,12797214
g1,49:22861510,12797214
x1,49:24938467,12797214
k1,49:32261406,12797214:7322939
)
(1,49:7882014,14566686:24379392,1093018,322750
x1,49:9459904,14566686
x1,49:15656412,14566686
x1,49:19974693,14566686
g1,49:20390084,14566686
x1,49:26700155,14566686
g1,49:27115546,14566686
x1,49:28859294,14566686
x1,49:31154406,14566686
k1,49:32261406,14566686:1107000
)
(1,49:7882014,16336158:24379392,1057905,22781
x1,49:13029585,16336158
k1,49:22645495,16336158:9615910
k1,49:32261405,16336158:9615910
)
(1,49:7882014,17974558:24379392,418753,11237
x1,49:8440942,17974558
g1,49:8605367,17974558
x1,49:9624451,17974558
k1,49:20942929,17974558:11318478
k1,49:32261407,17974558:11318478
)
(1,49:7882014,18760990:24379392,432652,11237
h1,49:7882014,18760990:0,0,0
x1,49:11548469,18760990
x1,49:13449416,18760990
k1,49:22855411,18760990:9405995
k1,49:32261406,18760990:9405995
)
(1,49:7882014,19744030:24379392,433540,130859
h1,49:7882014,19744030:0,0,0
x1,49:9492557,19744030
x1,49:10995453,19744030
g1,49:11159878,19744030
x1,49:11653154,19744030
g1,49:11817579,19744030
x1,49:14808588,19744030
g1,49:14973013,19744030
x1,49:15959566,19744030
g1,49:16123991,19744030
x1,49:18951165,19744030
g1,49:19115590,19744030
x1,49:21482608,19744030
x1,49:22280486,19744030
k1,49:27270946,19744030:4990460
k1,49:32261406,19744030:4990460
)
(1,49:7882014,20464926:24379392,421415,127755
h1,49:7882014,20464926:0,0,0
x1,49:9394374,20464926
g1,49:9558799,20464926
x1,49:11728270,20464926
g1,49:11892695,20464926
x1,49:13075614,20464926
x1,49:14473823,20464926
k1,49:23367615,20464926:8893792
k1,49:32261407,20464926:8893792
)
(1,49:7882014,21185822:24379392,421415,12125
h1,49:7882014,21185822:0,0,0
x1,49:9394374,21185822
k1,49:20827890,21185822:11433516
k1,49:32261406,21185822:11433516
)
(1,49:7882014,21972254:24379392,433540,123319
h1,49:7882014,21972254:0,0,0
x1,49:9624452,21972254
x1,49:10170960,21972254
g1,49:10335385,21972254
x1,49:10828661,21972254
g1,49:10993086,21972254
x1,49:11387589,21972254
x1,49:12547439,21972254
k1,49:22404423,21972254:9856984
k1,49:32261407,21972254:9856984
)
(1,49:7882014,23414046:24379392,432652,11237
x1,49:8473473,23414046
g1,49:8637898,23414046
x1,49:9787696,23414046
k1,49:21024551,23414046:11236855
k1,49:32261406,23414046:11236855
)
(1,49:7882014,24200478:24379392,432652,127755
h1,49:7882014,24200478:0,0,0
x1,49:8572247,24200478
x1,49:10752958,24200478
x1,49:12653905,24200478
k1,49:22457655,24200478:9803750
k1,49:32261405,24200478:9803750
)
(1,49:7882014,25183518:24379392,433540,130859
h1,49:7882014,25183518:0,0,0
x1,49:9492557,25183518
x1,49:10995453,25183518
g1,49:11159878,25183518
x1,49:11653154,25183518
g1,49:11817579,25183518
x1,49:14644753,25183518
g1,49:14809178,25183518
x1,49:17176196,25183518
x1,49:17974074,25183518
k1,49:25117740,25183518:7143666
k1,49:32261406,25183518:7143666
)
(1,49:7882014,25904414:24379392,421415,127755
h1,49:7882014,25904414:0,0,0
x1,49:9493148,25904414
x1,49:10105899,25904414
g1,49:10270324,25904414
x1,49:12439795,25904414
g1,49:12604220,25904414
x1,49:13787139,25904414
x1,49:15185348,25904414
k1,49:23723377,25904414:8538029
k1,49:32261406,25904414:8538029
)
(1,49:7882014,26625310:24379392,421415,123319
h1,49:7882014,26625310:0,0,0
x1,49:9624452,26625310
k1,49:20942929,26625310:11318477
k1,49:32261406,26625310:11318477
)
(1,49:7882014,27411742:24379392,433540,123319
h1,49:7882014,27411742:0,0,0
x1,49:9624452,27411742
x1,49:10170960,27411742
g1,49:10335385,27411742
x1,49:10828661,27411742
g1,49:10993086,27411742
x1,49:11387589,27411742
x1,49:12547439,27411742
k1,49:22404423,27411742:9856984
k1,49:32261407,27411742:9856984
)
(1,49:7882014,28853534:24379392,432652,0
x1,49:8473473,28853534
g1,49:8637898,28853534
x1,49:9755164,28853534
k1,49:21008285,28853534:11253121
k1,49:32261406,28853534:11253121
)
(1,49:7882014,29639966:24379392,432652,127755
h1,49:7882014,29639966:0,0,0
x1,49:14375052,29639966
k1,49:23318229,29639966:8943177
k1,49:32261406,29639966:8943177
)
(1,49:7882014,30623006:24379392,433540,130859
h1,49:7882014,30623006:0,0,0
x1,49:9492557,30623006
x1,49:10995453,30623006
g1,49:11159878,30623006
x1,49:11653154,30623006
g1,49:11817579,30623006
x1,49:14644753,30623006
g1,49:14809178,30623006
x1,49:17176196,30623006
x1,49:17974074,30623006
k1,49:25117740,30623006:7143666
k1,49:32261406,30623006:7143666
)
(1,49:7882014,31343902:24379392,421415,130859
h1,49:7882014,31343902:0,0,0
x1,49:9723225,31343902
g1,49:9887650,31343902
x1,49:11070569,31343902
x1,49:12468778,31343902
k1,49:22365092,31343902:9896314
k1,49:32261406,31343902:9896314
)
(1,49:7882014,32064798:24379392,421415,12125
h1,49:7882014,32064798:0,0,0
x1,49:9394374,32064798
k1,49:20827890,32064798:11433516
k1,49:32261406,32064798:11433516
)
(1,49:7882014,32851230:24379392,433540,123319
h1,49:7882014,32851230:0,0,0
x1,49:9624452,32851230
x1,49:10170960,32851230
g1,49:10335385,32851230
x1,49:10828661,32851230
g1,49:10993086,32851230
x1,49:11387589,32851230
x1,49:12547439,32851230
k1,49:22404423,32851230:9856984
k1,49:32261407,32851230:9856984
)
(1,49:7882014,34293022:24379392,432652,11237
x1,49:8637898,34293022
x1,49:8966749,34293022
x1,49:9119344,34293022
g1,49:9283769,34293022
x1,49:10565461,34293022
k1,49:21413433,34293022:10847972
k1,49:32261405,34293022:10847972
)
(1,49:7882014,35079454:24379392,432652,127755
h1,49:7882014,35079454:0,0,0
x1,49:11055193,35079454
x1,49:12956140,35079454
k1,49:22608773,35079454:9652633
k1,49:32261406,35079454:9652633
)
(1,49:7882014,36062494:24379392,433540,130859
h1,49:7882014,36062494:0,0,0
x1,49:8835445,36062494
x1,49:11394094,36062494
g1,49:11558519,36062494
x1,49:12051795,36062494
g1,49:12216220,36062494
x1,49:13235304,36062494
x1,49:14831651,36062494
g1,49:14996076,36062494
x1,49:17823250,36062494
g1,49:17987675,36062494
x1,49:18349057,36062494
x1,49:21170907,36062494
k1,49:26716157,36062494:5545250
k1,49:32261406,36062494:5545249
)
(1,49:7882014,36783390:24379392,433540,130859
h1,49:7882014,36783390:0,0,0
x1,49:9492557,36783390
x1,49:10995453,36783390
g1,49:11159878,36783390
x1,49:11653154,36783390
g1,49:11817579,36783390
x1,49:14808588,36783390
g1,49:14973013,36783390
x1,49:15959566,36783390
g1,49:16123991,36783390
x1,49:18951165,36783390
g1,49:19115590,36783390
x1,49:21482608,36783390
x1,49:22280486,36783390
k1,49:27270946,36783390:4990460
k1,49:32261406,36783390:4990460
)
(1,49:7882014,37504286:24379392,421415,127755
h1,49:7882014,37504286:0,0,0
x1,49:9394374,37504286
g1,49:9558799,37504286
x1,49:11728270,37504286
g1,49:11892695,37504286
x1,49:13075614,37504286
x1,49:14473823,37504286
k1,49:23367615,37504286:8893792
k1,49:32261407,37504286:8893792
)
(1,49:7882014,38225182:24379392,421415,12125
h1,49:7882014,38225182:0,0,0
x1,49:9394374,38225182
k1,49:20827890,38225182:11433516
k1,49:32261406,38225182:11433516
)
(1,49:7882014,39011614:24379392,433540,123319
h1,49:7882014,39011614:0,0,0
x1,49:9624452,39011614
x1,49:10170960,39011614
g1,49:10335385,39011614
x1,49:10828661,39011614
g1,49:10993086,39011614
x1,49:11387589,39011614
x1,49:12547439,39011614
k1,49:22404423,39011614:9856984
k1,49:32261407,39011614:9856984
)
]
(1,53:7882014,47115140:24379392,2467430,0
(1,53:7882014,47115140:24379392,2467430,0
[1,53:7882014,47115140:24379392,2467430,0
(1,53:7882014,45434142:24379392,65536,0
h1,53:7882014,45434142:0,0,0
(1,53:7882014,45434142:24379392,65536,0
r1,53:32261406,45434142:24379392,65536,0
)
g1,53:32261406,45434142
g1,53:32261406,45434142
)
[1,53:7882014,46023966:24379392,0,101252
(1,53:7882014,46361148:24379392,337182,101252
k1,53:12841962,46361148:4959948
h1,53:12841962,46361148:0,0,0
x1,53:13132941,46361148
x1,53:14172994,46361148
x1,53:14673360,46361148
g1,53:14775104,46361148
x1,53:15479942,46361148
g1,53:15581686,46361148
x1,53:16434964,46361148
g1,53:16536708,46361148
x1,53:16802620,46361148
x1,53:17073938,46361148
x1,53:17345256,46361148
x1,53:17616574,46361148
x1,53:17719793,46361148
g1,53:17821537,46361148
x1,53:17997501,46361148
x1,53:19280856,46361148
g1,53:19382600,46361148
x1,53:20087438,46361148
g1,53:20189182,46361148
x1,53:21042460,46361148
g1,53:21144204,46361148
x1,53:21410116,46361148
x1,53:21681434,46361148
x1,53:21952752,46361148
x1,53:22224070,46361148
x1,53:22327289,46361148
g1,53:22429033,46361148
x1,53:24279111,46361148
g1,53:24380855,46361148
x1,53:25085693,46361148
g1,53:25187437,46361148
x1,53:26040715,46361148
g1,53:26142459,46361148
x1,53:26408371,46361148
x1,53:26679689,46361148
x1,53:26951007,46361148
x1,53:27222325,46361148
x1,53:27301459,46361148
g1,53:27301459,46361148
k1,53:32261406,46361148:4959947
)
]
(1,53:7882014,47115140:24379392,65536,0
h1,53:7882014,47115140:0,0,0
(1,53:7882014,47115140:24379392,65536,0
r1,53:32261406,47115140:24379392,65536,0
)
g1,53:32261406,47115140
g1,53:32261406,47115140
)
]
)
)
]
]
!11086
}1
Input:56:C:\Users\User\AppData\Local\Programs\MiKTeX 2.9\tex\latex\fourier\fmlfutmi.fd
Input:57:C:\Users\User\AppData\Local\Programs\MiKTeX 2.9\tex\latex\txfonts\ot1txr.fd
Input:58:C:\Users\User\AppData\Local\Programs\MiKTeX 2.9\tex\latex\txfonts\utxmia.fd
Input:59:C:\Users\User\AppData\Local\Programs\MiKTeX 2.9\tex\latex\txfonts\utxsya.fd
Input:60:C:\Users\User\AppData\Local\Programs\MiKTeX 2.9\tex\latex\txfonts\utxsyb.fd
Input:61:C:\Users\User\AppData\Local\Programs\MiKTeX 2.9\tex\latex\txfonts\utxsyc.fd
!522
{2
[1,89:4736286,46613790:27590656,41877504,0
[1,89:7947550,46613790:24379392,41222144,0
[1,89:7947550,6178078:24379392,786432,0
(1,89:7947550,6800670:24379392,1409024,0
(1,89:7947550,6800670:24379392,1409024,0
[1,89:7947550,6800670:24379392,1409024,0
(1,89:7947550,5457182:24379392,65536,0
h1,89:7947550,5457182:0,0,0
(1,89:7947550,5457182:24379392,65536,0
r1,89:32326942,5457182:24379392,65536,0
)
g1,89:32326942,5457182
g1,89:32326942,5457182
)
(1,89:7947550,6276382:24379392,395657,0
x1,89:8282504,6276382
k1,89:32326942,6276382:24044438
)
(1,89:7947550,6276382:24379392,395657,68796
(1,89:7947550,6276382:24379392,395657,68796
k1,89:16323621,6276382:8376071
x1,89:17415634,6276382
g1,89:17544510,6276382
x1,89:18574257,6276382
x1,89:19653817,6276382
x1,89:21488556,6276382
g1,89:21617432,6276382
x1,89:23950872,6276382
k1,89:32326942,6276382:8376070
)
)
(1,89:7947550,6800670:24379392,65536,0
h1,89:7947550,6800670:0,0,0
(1,89:7947550,6800670:24379392,65536,0
r1,89:32326942,6800670:24379392,65536,0
)
g1,89:32326942,6800670
g1,89:32326942,6800670
)
]
)
)
]
[1,89:7947550,44647710:24379392,36831232,0
(1,51:7947550,8471838:24379392,637594,16560
(1,51:7947550,8471838:0,0,0
g1,51:7947550,8471838
)
x1,51:11578743,8471838
x1,51:12705754,8471838
k1,51:22516348,8471838:9810594
k1,51:32326942,8471838:9810594
)
(1,53:7947550,9672419:24379392,449576,148438
x1,53:8997435,9672419
k1,52:9409200,9672419:411765
x1,52:10269031,9672419
x1,52:10923080,9672419
x1,52:11669534,9672419
x1,52:12351107,9672419
k1,52:12762873,9672419:411766
x1,52:13804894,9672419
x1,52:16485971,9672419
k1,52:16897736,9672419:411765
x1,52:17437752,9672419
k1,52:17849517,9672419:411765
x1,52:19132709,9672419
k1,52:19544475,9672419:411766
x1,52:19843319,9672419
x1,52:20148716,9672419
x1,52:20922040,9672419
k1,52:21333805,9672419:411765
x1,52:21944600,9672419
x1,52:22587507,9672419
x1,52:23071162,9672419
x1,52:24437586,9672419
k1,52:24849351,9672419:411765
x1,52:25403129,9672419
x1,52:25804208,9672419
x1,52:26259683,9672419
x1,52:26729575,9672419
k1,52:27141341,9672419:411766
x1,52:27579776,9672419
k1,52:27991541,9672419:411765
x1,52:28679669,9672419
x1,52:28994897,9672419
x1,52:29758390,9672419
x1,52:30424891,9672419
k1,52:30836656,9672419:411765
x1,52:31465145,9672419
x1,52:32326942,9672419
k1,52:32326942,9672419:0
)
(1,53:7947550,10458851:24379392,449576,148438
x1,53:8548514,10458851
x1,52:11010700,10458851
x1,52:12619608,10458851
k1,52:12862026,10458851:242418
x1,52:13096644,10458851
x1,52:13394832,10458851
x1,52:15090247,10458851
k1,52:15332666,10458851:242419
x1,52:15680662,10458851
x1,52:15915280,10458851
x1,52:16808534,10458851
k1,52:17050952,10458851:242418
x1,52:18794208,10458851
k1,52:19036627,10458851:242419
x1,52:19997383,10458851
x1,52:21222248,10458851
k1,52:21464559,10458851:242311
x1,52:22513135,10458851
k1,52:22755553,10458851:242418
x1,52:23226101,10458851
x1,52:24547304,10458851
x1,52:24772092,10458851
x1,52:25098461,10458851
x1,52:26527798,10458851
k1,52:26770217,10458851:242419
x1,52:27973457,10458851
x1,52:28705493,10458851
x1,52:29227814,10458851
x1,52:30815094,10458851
k1,52:31057512,10458851:242418
x1,52:32326942,10458851
k1,52:32326942,10458851:0
)
(1,53:7947550,11245283:24379392,449576,148438
x1,53:8307998,11245283
x1,53:9857923,11245283
x1,53:10595202,11245283
k1,52:10812572,11245283:217370
x1,52:12466698,11245283
k1,52:12683985,11245283:217287
x1,52:13232521,11245283
k1,52:13449891,11245283:217370
x1,52:14332659,11245283
k1,52:14550029,11245283:217370
x1,52:15799143,11245283
k1,52:16016513,11245283:217370
x1,52:16724957,11245283
x1,52:18305029,11245283
k1,52:18718589,11245283:413560
x1,52:19768474,11245283
k1,52:19985844,11245283:217370
x1,52:20586808,11245283
x1,52:20930872,11245283
x1,52:22578446,11245283
k1,52:22795816,11245283:217370
x1,52:23477390,11245283
x1,52:24078354,11245283
x1,52:25402180,11245283
k1,52:25619550,11245283:217370
x1,52:26485935,11245283
x1,52:27368704,11245283
x1,52:27918550,11245283
k1,52:28135920,11245283:217370
x1,52:28684456,11245283
x1,52:29887696,11245283
x1,52:30488660,11245283
x1,52:31312446,11245283
x1,52:32326942,11245283
k1,52:32326942,11245283:0
)
(1,53:7947550,12031715:24379392,449576,148438
x1,53:8418098,12031715
x1,52:9739301,12031715
x1,52:9964089,12031715
x1,52:10290458,12031715
x1,52:11719795,12031715
k1,52:11900734,12031715:180939
x1,52:13132810,12031715
k1,52:13313704,12031715:180894
x1,52:14088338,12031715
k1,52:14269278,12031715:180940
x1,52:15289018,12031715
x1,52:15993528,12031715
x1,52:16869742,12031715
x1,52:17731539,12031715
k1,52:17912478,12031715:180939
x1,52:18795246,12031715
k1,52:18976185,12031715:180939
x1,52:20107334,12031715
x1,52:20689948,12031715
x1,52:21583202,12031715
k1,52:21764142,12031715:180940
x1,52:23507398,12031715
k1,52:23688337,12031715:180939
x1,52:24403989,12031715
x1,52:24848978,12031715
k1,52:25029918,12031715:180940
x1,52:26396342,12031715
k1,52:26700610,12031715:304268
x1,52:27083340,12031715
k1,52:27264234,12031715:180894
x1,52:27865198,12031715
x1,52:29120211,12031715
k1,52:29301150,12031715:180939
x1,52:29649146,12031715
x1,52:29883764,12031715
x1,52:31122391,12031715
x1,52:31470387,12031715
x1,52:32326942,12031715
k1,52:32326942,12031715:0
)
(1,53:7947550,12818147:24379392,449576,135003
x1,53:8617983,12818147
x1,53:9821223,12818147
x1,53:10535565,12818147
x1,53:10974000,12818147
x1,53:12077625,12818147
k1,52:12213539,12818147:135914
x1,52:13926647,12818147
k1,52:14062561,12818147:135914
x1,52:14602577,12818147
k1,52:14738490,12818147:135913
x1,52:15621258,12818147
k1,52:15757172,12818147:135914
x1,52:17074445,12818147
x1,52:18258023,12818147
k1,52:18393937,12818147:135914
x1,52:19265565,12818147
x1,52:19707276,12818147
x1,52:20180444,12818147
k1,52:20316358,12818147:135914
x1,52:20754793,12818147
k1,52:20890707,12818147:135914
x1,52:21910447,12818147
x1,52:23812955,12818147
k1,52:23948869,12818147:135914
x1,52:24503958,12818147
k1,52:24639872,12818147:135914
x1,52:25242802,12818147
x1,52:25684513,12818147
x1,52:26499779,12818147
k1,52:26635693,12818147:135914
x1,52:27926751,12818147
k1,52:28062664,12818147:135913
x1,52:29900292,12818147
k1,52:30036206,12818147:135914
x1,52:31084782,12818147
k1,52:31220696,12818147:135914
x1,52:31867536,12818147
x1,52:32102154,12818147
x1,52:32326942,12818147
k1,53:32326942,12818147:0
)
(1,53:7947550,13604579:24379392,449576,148438
x1,53:8182168,13604579
x1,53:8480356,13604579
x1,53:10190845,13604579
x1,53:11052642,13604579
k1,52:11170963,13604579:118321
x1,52:12244441,13604579
x1,52:12958783,13604579
x1,52:13193401,13604579
x1,52:13671157,13604579
k1,52:13789478,13604579:118321
x1,52:14436318,13604579
x1,52:14746303,13604579
x1,52:15305980,13604579
x1,52:16933237,13604579
x1,52:17081348,13604579
k1,52:17243996,13604579:162648
x1,52:18535054,13604579
k1,52:18653358,13604579:118304
x1,52:20490986,13604579
k1,52:20609307,13604579:118321
x1,52:21159153,13604579
x1,52:21457341,13604579
k1,52:21575662,13604579:118321
x1,52:22111746,13604579
x1,52:22346364,13604579
x1,52:23624313,13604579
k1,52:23742634,13604579:118321
x1,52:24343598,13604579
x1,52:24687662,13604579
x1,52:26343100,13604579
k1,52:26461421,13604579:118321
x1,52:27016510,13604579
k1,52:27134831,13604579:118321
x1,52:28017599,13604579
k1,52:28135920,13604579:118321
x1,52:28684456,13604579
x1,52:29887696,13604579
x1,52:30488660,13604579
x1,52:31312446,13604579
x1,52:32326942,13604579
k1,52:32326942,13604579:0
)
(1,53:7947550,14391011:24379392,449576,148438
x1,53:8418098,14391011
x1,52:9739301,14391011
x1,52:9964089,14391011
x1,52:10290458,14391011
x1,52:11719795,14391011
k1,52:11916053,14391011:196258
x1,52:13263471,14391011
x1,52:14367096,14391011
k1,52:14563353,14391011:196257
x1,52:15118442,14391011
k1,52:15314700,14391011:196258
x1,52:15624685,14391011
x1,52:16184362,14391011
x1,52:18022644,14391011
k1,52:18218902,14391011:196258
x1,52:18453520,14391011
x1,52:18751708,14391011
x1,52:19771448,14391011
x1,52:20475958,14391011
x1,52:21352172,14391011
k1,52:21548429,14391011:196257
x1,52:22431197,14391011
k1,52:22627455,14391011:196258
x1,52:23343107,14391011
x1,52:23788096,14391011
k1,52:23984354,14391011:196258
x1,52:25350778,14391011
k1,52:25701001,14391011:350223
x1,52:26750886,14391011
k1,52:26947144,14391011:196258
x1,52:29094756,14391011
x1,52:29611179,14391011
x1,52:30577833,14391011
k1,52:30774090,14391011:196257
x1,52:31212525,14391011
k1,52:31408783,14391011:196258
x1,52:32090357,14391011
x1,52:32326942,14391011
k1,53:32326942,14391011:0
)
(1,53:7947550,15177443:24379392,449576,148438
x1,53:9328392,15177443
k1,52:9444544,15177443:116152
x1,52:9999633,15177443
k1,52:10115785,15177443:116152
x1,52:10431013,15177443
k1,52:10547166,15177443:116153
x1,52:12133790,15177443
x1,52:12995587,15177443
k1,52:13111739,15177443:116152
x1,52:14432943,15177443
x1,52:15337994,15177443
k1,52:15454146,15177443:116152
x1,52:16502722,15177443
k1,52:16618874,15177443:116152
x1,52:17307002,15177443
k1,52:17423155,15177443:116153
x1,52:17914019,15177443
x1,52:18148637,15177443
x1,52:19037303,15177443
k1,52:19153455,15177443:116152
x1,52:19892045,15177443
x1,52:20562478,15177443
x1,52:20797096,15177443
x1,52:21454421,15177443
x1,52:22316218,15177443
k1,52:22432370,15177443:116152
x1,52:22775123,15177443
x1,52:23176202,15177443
x1,52:23631677,15177443
x1,52:23755540,15177443
k1,52:23871692,15177443:116152
x1,52:25050027,15177443
k1,52:25166180,15177443:116153
x1,52:27269883,15177443
k1,52:27386035,15177443:116152
x1,52:28056468,15177443
x1,52:28589930,15177443
x1,52:30038929,15177443
k1,52:30155081,15177443:116152
x1,52:31358321,15177443
x1,52:32090357,15177443
x1,52:32326942,15177443
k1,53:32326942,15177443:0
)
(1,53:7947550,15963875:24379392,449576,148438
x1,53:8469871,15963875
x1,53:10057151,15963875
k1,52:10170724,15963875:113573
x1,52:11419838,15963875
x1,52:11567949,15963875
k1,52:11685940,15963875:117991
x1,52:13169017,15963875
k1,52:13282590,15963875:113573
x1,52:13883554,15963875
x1,52:14181742,15963875
x1,52:14989144,15963875
x1,52:15304371,15963875
x1,52:16166168,15963875
k1,52:16279741,15963875:113573
x1,52:17162509,15963875
k1,52:17276082,15963875:113573
x1,52:17890154,15963875
x1,52:18571728,15963875
x1,52:19276239,15963875
x1,52:19964365,15963875
k1,52:20077938,15963875:113573
x1,52:20617954,15963875
k1,52:20731527,15963875:113573
x1,52:21345599,15963875
x1,52:22010133,15963875
x1,52:22244751,15963875
x1,52:23544982,15963875
k1,52:23658555,15963875:113573
x1,52:24259519,15963875
x1,52:24557707,15963875
x1,52:25599728,15963875
x1,52:26461525,15963875
k1,52:26575098,15963875:113573
x1,52:27457866,15963875
k1,52:27571439,15963875:113573
x1,52:28287091,15963875
x1,52:28732080,15963875
k1,52:28845653,15963875:113573
x1,52:30212077,15963875
k1,52:30373142,15963875:161065
x1,52:30761115,15963875
x1,52:31774955,15963875
k1,52:31888507,15963875:113552
x1,52:32326942,15963875
k1,52:32326942,15963875:0
)
(1,53:7947550,16750307:24379392,449576,148438
x1,53:8561622,16750307
x1,53:9243196,16750307
x1,53:10082056,16750307
k1,52:10201485,16750307:119429
x1,52:10741501,16750307
k1,52:10860930,16750307:119429
x1,52:11095548,16750307
x1,52:11393736,16750307
x1,52:12418718,16750307
x1,52:13280515,16750307
k1,52:13399944,16750307:119429
x1,52:14282712,16750307
k1,52:14402141,16750307:119429
x1,52:15605381,16750307
x1,52:16337417,16750307
x1,52:16859738,16750307
x1,52:18447018,16750307
k1,52:18566447,16750307:119429
x1,52:19815561,16750307
k1,52:19934990,16750307:119429
x1,52:20295438,16750307
x1,52:20585761,16750307
k1,52:20705191,16750307:119430
x1,52:21227512,16750307
k1,52:21346941,16750307:119429
x1,52:22610473,16750307
k1,52:22729902,16750307:119429
x1,52:23874814,16750307
k1,52:23994243,16750307:119429
x1,52:25042819,16750307
k1,52:25162248,16750307:119429
x1,52:26582412,16750307
x1,52:27916068,16750307
k1,52:28035497,16750307:119429
x1,52:28918265,16750307
k1,52:29037694,16750307:119429
x1,52:29836577,16750307
x1,52:30370039,16750307
x1,52:31034573,16750307
x1,52:32326942,16750307
k1,52:32326942,16750307:0
)
(1,53:7947550,17536739:24379392,449576,148438
x1,53:9707844,17536739
k1,52:9903042,17536739:195198
x1,52:11367770,17536739
k1,52:11714815,17536739:347045
x1,52:12764700,17536739
k1,52:12959898,17536739:195198
x1,52:14775243,17536739
k1,52:14970442,17536739:195199
x1,52:15510458,17536739
k1,52:15705656,17536739:195198
x1,52:16048409,17536739
x1,52:16449488,17536739
x1,52:16904963,17536739
k1,52:17100101,17536739:195138
x1,52:17649947,17536739
x1,52:17948135,17536739
k1,52:18143333,17536739:195198
x1,52:19237783,17536739
k1,52:19432982,17536739:195199
x1,52:19981518,17536739
x1,52:20285604,17536739
x1,52:20855111,17536739
x1,52:21237840,17536739
x1,52:22903763,17536739
k1,52:23250807,17536739:347044
x1,52:24300692,17536739
k1,52:24495891,17536739:195199
x1,52:26599594,17536739
k1,52:26794792,17536739:195198
x1,52:27781764,17536739
k1,52:27976962,17536739:195198
x1,52:28647395,17536739
k1,52:28842594,17536739:195199
x1,52:30141516,17536739
k1,52:30336714,17536739:195198
x1,52:30891803,17536739
k1,52:31087001,17536739:195198
x1,52:31775129,17536739
x1,52:32090357,17536739
x1,52:32326942,17536739
k1,53:32326942,17536739:0
)
(1,53:7947550,18323171:24379392,449576,148438
x1,53:8711043,18323171
x1,53:9017096,18323171
k1,52:9202267,18323171:185171
x1,52:10085035,18323171
k1,52:10270207,18323171:185172
x1,52:11364003,18323171
x1,52:12080966,18323171
x1,52:12940797,18323171
k1,52:13125968,18323171:185171
x1,52:13985799,18323171
x1,52:14639848,18323171
x1,52:15386302,18323171
x1,52:16067875,18323171
k1,52:16253046,18323171:185171
x1,52:17295067,18323171
x1,52:19976144,18323171
k1,52:20161315,18323171:185171
x1,52:20709851,18323171
k1,52:20895023,18323171:185172
x1,52:21777791,18323171
k1,52:21962962,18323171:185171
x1,52:23212076,18323171
k1,52:23397247,18323171:185171
x1,52:24105691,18323171
x1,52:25525855,18323171
k1,52:25711026,18323171:185171
x1,52:27194103,18323171
k1,52:27379275,18323171:185172
x1,52:29051753,18323171
x1,52:29913550,18323171
k1,52:30098721,18323171:185171
x1,52:30333339,18323171
x1,52:30631527,18323171
x1,52:32326942,18323171
k1,52:32326942,18323171:0
)
(1,53:7947550,19109603:24379392,449576,135003
x1,53:9150790,19109603
x1,53:9882826,19109603
x1,53:10405147,19109603
x1,53:11992427,19109603
g1,52:12128086,19109603
x1,52:13377200,19109603
x1,52:13525311,19109603
k1,53:32326943,19109603:18801632
g1,53:32326943,19109603
)
(1,55:7947550,21498932:24379392,637594,16560
(1,55:7947550,21498932:0,0,0
g1,55:7947550,21498932
)
x1,55:12982931,21498932
x1,55:15277049,21498932
k1,55:23801995,21498932:8524946
k1,55:32326941,21498932:8524946
)
(1,68:7947550,22699513:24379392,449576,135003
(1,68:7947550,22699513:1574408,298188,104018
(1,68:7947550,22699513:997692,298188,104018
$1,68:7947550,22699513
x1,68:8318483,22699513
(1,68:8318483,22799547:232993,330720,3984
x1,68:8491314,22799547
)
$1,68:8551476,22699513
k1,68:8945242,22699513:393766
)
g1,68:9521958,22699513
)
x1,68:9896168,22699513
x1,68:11651219,22699513
x1,68:12128975,22699513
g1,68:12264634,22699513
x1,68:13221459,22699513
x1,68:15145594,22699513
k1,68:32326942,22699513:17181348
g1,68:32326942,22699513
)
(1,68:7947550,23539647:24379392,449576,135003
(1,68:7947550,23539647:1574408,413531,104018
(1,68:7947550,23539647:997692,413531,104018
$1,68:7947550,23539647
[1,68:7947550,23539647:603926,413531,104018
(1,68:8128927,23529817:0,403701,0
x1,68:8370099,23529817
)
(1,68:7947550,23539647:603926,298188,104018
x1,68:8318483,23539647
(1,68:8318483,23639681:232993,330720,3984
x1,68:8491314,23639681
)
)
]
$1,68:8551476,23539647
k1,68:8945242,23539647:393766
)
g1,68:9521958,23539647
)
x1,68:9934179,23539647
x1,68:12745670,23539647
g1,68:12881329,23539647
x1,68:14537422,23539647
g1,68:14673081,23539647
x1,68:17006160,23539647
k1,68:32326942,23539647:15320782
g1,68:32326942,23539647
)
(1,68:7947550,24379780:24379392,426639,148438
(1,68:7947550,24379780:1574408,298188,5242
(1,68:7947550,24379780:997692,298188,5242
$1,68:7947550,24379780
x1,68:8253603,24379780
$1,68:8264744,24379780
k1,68:8945242,24379780:680498
)
g1,68:9521958,24379780
)
x1,68:9887648,24379780
x1,68:10802529,24379780
x1,68:11417255,24379780
k1,68:32326943,24379780:20909688
g1,68:32326943,24379780
)
(1,68:7947550,25219914:24379392,449576,98303
(1,68:7947550,25219914:1574408,421723,98303
(1,68:7947550,25219914:997692,421723,98303
$1,68:7947550,25219914
x1,68:8433826,25219914
(1,68:8433826,25318217:511416,320510,0
x1,68:8880100,25318217
)
$1,68:8945242,25219914
g1,68:8945242,25219914
)
g1,68:9521958,25219914
)
x1,68:9992506,25219914
x1,68:11801297,25219914
g1,68:11936956,25219914
x1,68:12476972,25219914
g1,68:12612631,25219914
x1,68:13903689,25219914
g1,68:14039348,25219914
x1,68:15876976,25219914
k1,68:32326942,25219914:16449966
g1,68:32326942,25219914
)
(1,68:7947550,26060047:24379392,426639,148111
(1,68:7947550,26060047:1574408,298188,148111
(1,68:7947550,26060047:997692,298188,148111
$1,68:7947550,26060047
x1,68:8349285,26060047
$1,68:8362392,26060047
k1,68:8945242,26060047:582850
)
g1,68:9521958,26060047
)
x1,68:9883716,26060047
x1,68:10111125,26060047
x1,68:11535219,26060047
x1,68:11833407,26060047
k1,68:32326943,26060047:20493536
g1,68:32326943,26060047
)
(1,68:7947550,26900181:24379392,426639,148438
(1,68:7947550,26900181:1574408,316538,148111
(1,68:7947550,26900181:997692,316538,148111
$1,68:7947550,26900181
x1,68:8317173,26900181
$1,68:8347974,26900181
k1,68:8945242,26900181:597268
)
g1,68:9521958,26900181
)
x1,68:9991851,26900181
x1,68:12020187,26900181
g1,68:12155846,26900181
x1,68:12756810,26900181
x1,68:14180904,26900181
x1,68:14479092,26900181
k1,68:32326942,26900181:17847850
g1,68:32326942,26900181
)
(1,68:7947550,27740314:24379392,449576,148438
(1,68:7947550,27740314:1574408,431881,148111
(1,68:7947550,27740314:997692,431881,148111
$1,68:7947550,27740314
[1,68:7947550,27740314:400424,431881,148111
(1,68:8076327,27712134:0,403701,0
x1,68:8317499,27712134
)
(1,68:7947550,27740314:400424,316538,148111
x1,68:8317173,27740314
)
]
$1,68:8347974,27740314
k1,68:8945242,27740314:597268
)
g1,68:9521958,27740314
)
x1,68:9904688,27740314
x1,68:10172729,27740314
x1,68:10714055,27740314
x1,68:11646630,27740314
g1,68:11782289,27740314
x1,68:14167142,27740314
g1,68:14302801,27740314
x1,68:14903765,27740314
x1,68:16327859,27740314
x1,68:16626047,27740314
k1,68:32326942,27740314:15700895
g1,68:32326942,27740314
)
(1,68:7947550,28580448:24379392,449576,148438
(1,68:7947550,28580448:1574408,421723,5242
(1,68:7947550,28580448:997692,421723,5242
$1,68:7947550,28580448
x1,68:8353218,28580448
x1,68:8679587,28580448
$1,68:8690728,28580448
k1,68:8945242,28580448:254514
)
g1,68:9521958,28580448
)
x1,68:9909931,28580448
x1,68:12026086,28580448
g1,68:12161745,28580448
x1,68:14361786,28580448
k1,68:32326942,28580448:17965156
g1,68:32326942,28580448
)
(1,68:7947550,29420581:24379392,449576,148438
(1,68:7947550,29420581:1574408,298188,5242
(1,68:7947550,29420581:997692,298188,5242
$1,68:7947550,29420581
x1,68:8340110,29420581
$1,68:8353217,29420581
k1,68:8945242,29420581:592025
)
g1,68:9521958,29420581
)
x1,68:9871920,29420581
x1,68:10381134,29420581
x1,68:10826123,29420581
g1,68:10961782,29420581
x1,68:11265868,29420581
x1,68:13075969,29420581
k1,68:32326941,29420581:19250972
g1,68:32326941,29420581
)
(1,68:7947550,30260715:24379392,449576,148438
(1,68:7947550,30260715:1574408,413531,5242
(1,68:7947550,30260715:997692,413531,5242
$1,68:7947550,30260715
[1,68:7947550,30260715:405667,413531,5242
(1,68:8078949,30250885:0,403701,0
x1,68:8320121,30250885
)
(1,68:7947550,30260715:405667,298188,5242
x1,68:8340110,30260715
)
]
$1,68:8353217,30260715
k1,68:8945242,30260715:592025
)
g1,68:9521958,30260715
)
x1,68:9871920,30260715
x1,68:10381134,30260715
x1,68:10826123,30260715
g1,68:10961782,30260715
x1,68:11581096,30260715
x1,68:12122422,30260715
x1,68:13054997,30260715
g1,68:13190656,30260715
x1,68:13494742,30260715
x1,68:15304843,30260715
k1,68:32326943,30260715:17022100
g1,68:32326943,30260715
)
(1,68:7947550,31100848:24379392,449576,349690
(1,68:7947550,31100848:1574408,421723,349690
(1,68:7947550,31100848:997692,421723,349690
$1,68:7947550,31100848
[1,68:7947550,31100848:667811,421723,349690
[1,68:7947550,31100848:667811,421723,174845
(1,68:7947550,31100848:667811,421723,0
x1,68:8511159,31100848
)
]
]
$1,68:8615361,31100848
k1,68:8945242,31100848:329881
)
g1,68:9521958,31100848
)
x1,68:9848327,31100848
x1,68:12074582,31100848
g1,68:12210241,31100848
x1,68:13523580,31100848
x1,68:13996748,31100848
k1,68:32326942,31100848:18330194
g1,68:32326942,31100848
)
(1,76:7947550,33346407:24379392,489581,144565
(1,76:7947550,33346407:0,0,0
g1,76:7947550,33346407
)
x1,76:9844966,33346407
g1,76:10031026,33346407
x1,76:12448476,33346407
k1,76:22387709,33346407:9939233
k1,76:32326942,33346407:9939233
)
(1,84:7947550,34497837:24379392,449576,148438
(1,84:7947550,34497837:1574408,307691,148111
(1,84:7947550,34497837:997692,307691,148111
$1,84:7947550,34497837
x1,84:8306687,34497837
$1,84:8306687,34497837
k1,84:8945242,34497837:638555
)
g1,84:9521958,34497837
)
x1,84:9887648,34497837
x1,84:11359584,34497837
x1,84:12514982,34497837
k1,84:32326942,34497837:19811960
g1,84:32326942,34497837
)
(1,84:7947550,35337970:24379392,426639,148438
(1,84:7947550,35337970:1574408,298188,148111
(1,84:7947550,35337970:997692,298188,148111
$1,84:7947550,35337970
x1,84:8330935,35337970
$1,84:8330935,35337970
k1,84:8945242,35337970:614307
)
g1,84:9521958,35337970
)
x1,84:9991851,35337970
x1,84:11621729,35337970
k1,84:32326941,35337970:20705212
g1,84:32326941,35337970
)
(1,84:7947550,36178104:24379392,449576,12123
(1,84:7947550,36178104:1574408,421723,0
(1,84:7947550,36178104:997692,421723,0
$1,84:7947550,36178104
x1,84:8410234,36178104
$1,84:8410234,36178104
k1,84:8945242,36178104:535008
)
g1,84:9521958,36178104
)
x1,84:10813016,36178104
g1,84:10948675,36178104
x1,84:12523504,36178104
k1,84:32326942,36178104:19803438
g1,84:32326942,36178104
)
(1,84:7947550,37018237:24379392,450560,135003
(1,84:7947550,37018237:1574408,450560,5242
(1,84:7947550,37018237:997692,450560,5242
$1,84:7947550,37018237
x1,84:8279161,37018237
$1,84:8279161,37018237
k1,84:8945242,37018237:666081
)
g1,84:9521958,37018237
)
x1,84:9883716,37018237
x1,84:10411935,37018237
x1,84:11282906,37018237
g1,84:11418565,37018237
x1,84:12677510,37018237
x1,84:13776546,37018237
k1,84:32326942,37018237:18550396
g1,84:32326942,37018237
)
(1,84:7947550,37858371:24379392,449576,135003
(1,84:7947550,37858371:1574408,295895,115015
(1,84:7947550,37858371:997692,295895,115015
$1,84:7947550,37858371
x1,84:8490188,37858371
$1,84:8490188,37858371
k1,84:8945242,37858371:455054
)
g1,84:9521958,37858371
)
x1,84:9991851,37858371
x1,84:10988652,37858371
g1,84:11124311,37858371
x1,84:12383256,37858371
x1,84:13482292,37858371
k1,84:32326942,37858371:18844650
g1,84:32326942,37858371
)
(1,84:7947550,38698504:24379392,449576,12123
(1,84:7947550,38698504:1574408,298188,5242
(1,84:7947550,38698504:997692,298188,5242
$1,84:7947550,38698504
x1,84:8280473,38698504
$1,84:8280473,38698504
k1,84:8945242,38698504:664769
)
g1,84:9521958,38698504
)
x1,84:9848327,38698504
x1,84:11066639,38698504
g1,84:11202298,38698504
x1,84:11976932,38698504
x1,84:12573964,38698504
k1,84:32326942,38698504:19752978
g1,84:32326942,38698504
)
(1,87:7947550,41087833:24379392,637594,16560
(1,87:7947550,41087833:1647370,617111,16560
g1,87:7947550,41087833
x1,87:9159107,41087833
)
x1,87:11628422,41087833
x1,87:16259367,41087833
k1,87:24293155,41087833:8033788
k1,87:32326942,41087833:8033787
)
(1,89:7947550,42288414:24379392,449576,135003
x1,89:8297512,42288414
x1,88:8858499,42288414
k1,88:9054454,42288414:195955
x1,88:9937222,42288414
k1,88:10133177,42288414:195955
x1,88:11284643,42288414
k1,88:11480598,42288414:195955
x1,88:12152340,42288414
x1,88:12459048,42288414
k1,88:12655003,42288414:195955
x1,88:14872740,42288414
x1,88:15026749,42288414
k1,88:15237778,42288414:211029
x1,88:15679489,42288414
x1,88:15988818,42288414
x1,88:16524902,42288414
x1,88:18112182,42288414
k1,88:18308137,42288414:195955
x1,88:19841023,42288414
k1,88:20036978,42288414:195955
x1,88:21476146,42288414
x1,88:22447389,42288414
k1,88:22643344,42288414:195955
x1,88:23936367,42288414
k1,88:24132322,42288414:195955
x1,88:24710349,42288414
k1,88:24906304,42288414:195955
x1,88:25789072,42288414
k1,88:25985027,42288414:195955
x1,88:27059161,42288414
x1,88:28105114,42288414
k1,88:28301069,42288414:195955
x1,88:28991817,42288414
x1,88:29983375,42288414
k1,88:30179330,42288414:195955
x1,88:32326942,42288414
k1,88:32326942,42288414:0
)
(1,89:7947550,43074846:24379392,449576,76349
x1,89:9751098,43074846
k1,88:9983793,43074846:232695
x1,88:11032369,43074846
k1,88:11265161,43074846:232792
x1,88:11569247,43074846
x1,88:11913966,43074846
x1,88:12148584,43074846
x1,88:12963194,43074846
k1,88:13195987,43074846:232793
x1,88:13886735,43074846
x1,88:14878293,43074846
k1,88:15111086,43074846:232793
x1,88:17258698,43074846
k1,88:17491491,43074846:232793
x1,88:17702516,43074846
x1,88:19245887,43074846
k1,88:19478581,43074846:232694
x1,88:20463585,43074846
x1,88:20770293,43074846
k1,88:21003086,43074846:232793
x1,88:22356404,43074846
k1,88:22589197,43074846:232793
x1,88:23137733,43074846
x1,88:24126670,43074846
x1,88:24568381,43074846
x1,88:25232259,43074846
k1,88:25465052,43074846:232793
x1,88:26623072,43074846
x1,88:27533366,43074846
x1,88:28144816,43074846
k1,88:28377608,43074846:232792
x1,88:29152242,43074846
k1,88:29385035,43074846:232793
x1,88:30244866,43074846
x1,88:30898915,43074846
x1,88:31645369,43074846
x1,88:32326942,43074846
k1,88:32326942,43074846:0
)
(1,89:7947550,43861278:24379392,562141,148438
x1,89:9119333,43861278
x1,89:10260313,43861278
x1,89:10414322,43861278
k1,88:10529872,43861278:115550
x1,88:11143943,43861278
x1,88:11685269,43861278
k1,88:11795792,43861278:110523
x1,88:13215956,43861278
k1,88:13326479,43861278:110523
x1,88:14619501,43861278
k1,88:14730024,43861278:110523
x1,88:15278560,43861278
x1,88:15720271,43861278
x1,88:16064335,43861278
x1,88:17089317,43861278
x1,88:18192942,43861278
k1,88:18303464,43861278:110522
x1,88:18663912,43861278
x1,88:18954235,43861278
k1,88:19064758,43861278:110523
x1,88:19615915,43861278
x1,88:21012487,43861278
k1,88:21123010,43861278:110523
x1,88:22171586,43861278
k1,88:22282109,43861278:110523
x1,88:22632071,43861278
x1,88:24320276,43861278
x1,88:24444139,43861278
$1,88:24509675,43861278
(1,88:24509675,43623383:961176,324246,64500
x1,88:24670054,43623383
(1,88:24670054,43623383:243060,306813,0
x1,88:24913114,43623383
)
x1,88:25034644,43623383
(1,88:25034644,43623383:243060,306813,0
x1,88:25277704,43623383
)
x1,88:25438083,43623383
)
$1,88:25470851,43861278
k1,88:25581374,43861278:110523
x1,88:27204043,43861278
k1,88:27314565,43861278:110522
x1,88:28847451,43861278
k1,88:28957974,43861278:110523
x1,88:30397142,43861278
x1,88:31368385,43861278
k1,88:31478908,43861278:110523
x1,88:32028754,43861278
x1,88:32326942,43861278
k1,88:32326942,43861278:0
)
(1,89:7947550,44647710:24379392,449576,148438
x1,89:8496086,44647710
x1,89:9171761,44647710
x1,89:9406379,44647710
x1,89:10758384,44647710
k1,88:10896265,44647710:137881
x1,88:11613228,44647710
x1,88:12473059,44647710
k1,88:12610940,44647710:137881
x1,88:13792552,44647710
x1,88:15795985,44647710
k1,88:15934977,44647710:138992
x1,88:17136249,44647710
x1,88:17290258,44647710
k1,88:17428695,44647710:138437
x1,88:18616860,44647710
k1,88:18754741,44647710:137881
x1,88:19741713,44647710
x1,88:20669702,44647710
k1,88:20807583,44647710:137881
x1,88:21408547,44647710
x1,88:21752611,44647710
x1,88:22884416,44647710
k1,88:23022297,44647710:137881
x1,88:23636369,44647710
x1,88:24300903,44647710
x1,88:24535521,44647710
x1,88:25361928,44647710
k1,88:25499809,44647710:137881
x1,88:26359640,44647710
x1,88:26703704,44647710
x1,88:27064152,44647710
x1,88:29088557,44647710
k1,88:29226438,44647710:137881
x1,88:29827402,44647710
x1,88:30125590,44647710
x1,88:30960518,44647710
x1,88:32326942,44647710
k1,88:32326942,44647710:0
)
]
(1,89:7947550,46613790:24379392,0,0
h1,89:7947550,46613790:24379392,0,0
)
]
]
!27965
}2
!10
{3
[1,99:4736286,46613790:27525120,41877504,0
[1,99:7882014,46613790:24379392,41222144,0
[1,99:7882014,6178078:24379392,786432,0
(1,99:7882014,6800670:24379392,1409024,0
(1,99:7882014,6800670:24379392,1409024,0
[1,99:7882014,6800670:24379392,1409024,0
(1,99:7882014,5457182:24379392,65536,0
h1,99:7882014,5457182:0,0,0
(1,99:7882014,5457182:24379392,65536,0
r1,99:32261406,5457182:24379392,65536,0
)
g1,99:32261406,5457182
g1,99:32261406,5457182
)
(1,99:7882014,6276382:24379392,395657,55410
x1,99:8856344,6276382
g1,99:8985220,6276382
x1,99:9609667,6276382
g1,99:9738543,6276382
x1,99:10534811,6276382
k1,99:12002457,6276382:1467646
x1,99:13352210,6276382
g1,99:13481086,6276382
x1,99:15703699,6276382
g1,99:15832575,6276382
x1,99:16862322,6276382
x1,99:17831683,6276382
x1,99:19289131,6276382
g1,99:19418007,6276382
x1,99:20814454,6276382
x1,99:21831729,6276382
g1,99:21960605,6276382
x1,99:22794852,6276382
g1,99:22923728,6276382
x1,99:23624753,6276382
x1,99:27995267,6276382
g1,99:28124143,6276382
x1,99:28523834,6276382
x1,99:29549223,6276382
g1,99:29678099,6276382
x1,99:29861134,6276382
x1,99:30121370,6276382
x1,99:30381606,6276382
k1,99:31926452,6276382:1467645
x1,99:32261406,6276382
)
(1,99:7882014,6800670:24379392,65536,0
h1,99:7882014,6800670:0,0,0
(1,99:7882014,6800670:24379392,65536,0
r1,99:32261406,6800670:24379392,65536,0
)
g1,99:32261406,6800670
g1,99:32261406,6800670
)
]
)
)
]
[1,99:7882014,44647710:24379392,36831232,0
(1,89:7882014,8471838:24379392,449576,148438
x1,89:8430550,8471838
k1,88:8627215,8471838:196665
x1,88:9509983,8471838
k1,88:9706649,8471838:196666
x1,88:10307613,8471838
x1,88:10868600,8471838
x1,88:12160314,8471838
k1,88:12356979,8471838:196665
x1,88:12896995,8471838
k1,88:13093660,8471838:196665
x1,88:14787761,8471838
k1,88:14984426,8471838:196665
x1,88:16078222,8471838
x1,88:16795185,8471838
x1,88:17655016,8471838
k1,88:17851682,8471838:196666
x1,88:18567334,8471838
x1,88:19012323,8471838
k1,88:19208988,8471838:196665
x1,88:20188750,8471838
x1,88:20423368,8471838
x1,88:21031541,8471838
x1,88:21548619,8471838
x1,88:21783237,8471838
x1,88:22226259,8471838
x1,88:23170631,8471838
x1,88:23318742,8471838
k1,88:23670188,8471838:351446
x1,88:24052918,8471838
k1,88:24249521,8471838:196603
x1,88:24712860,8471838
x1,88:25592352,8471838
x1,88:26629131,8471838
x1,88:27447020,8471838
k1,88:27643686,8471838:196666
x1,88:28737482,8471838
x1,88:29454445,8471838
x1,88:30314276,8471838
k1,88:30510941,8471838:196665
x1,88:31370772,8471838
x1,88:32024821,8471838
x1,88:32261406,8471838
k1,89:32261406,8471838:0
)
(1,89:7882014,9258270:24379392,449576,148438
x1,89:8628468,9258270
x1,89:9310041,9258270
k1,88:9450946,9258270:140905
x1,88:10492967,9258270
x1,88:13174044,9258270
k1,88:13314948,9258270:140904
x1,88:14351727,9258270
x1,88:15169616,9258270
k1,88:15310521,9258270:140905
x1,88:15888548,9258270
k1,88:16029453,9258270:140905
x1,88:17312645,9258270
k1,88:17453549,9258270:140904
x1,88:17752393,9258270
x1,88:18057790,9258270
x1,88:18831114,9258270
k1,88:18972019,9258270:140905
x1,88:19582814,9258270
x1,88:20225721,9258270
x1,88:20709376,9258270
x1,88:22075800,9258270
k1,88:22216705,9258270:140905
x1,88:22770483,9258270
x1,88:23171562,9258270
x1,88:23627037,9258270
x1,88:24096929,9258270
k1,88:24237834,9258270:140905
x1,88:24787680,9258270
x1,88:25085868,9258270
k1,88:25226772,9258270:140904
x1,88:27139766,9258270
k1,88:27280671,9258270:140905
x1,88:27641119,9258270
x1,88:27931442,9258270
k1,88:28072347,9258270:140905
x1,88:28955115,9258270
k1,88:29096019,9258270:140904
x1,88:30790120,9258270
k1,88:30931025,9258270:140905
x1,88:32024821,9258270
x1,88:32261406,9258270
k1,89:32261406,9258270:0
)
(1,89:7882014,10044702:24379392,449576,148438
x1,89:8598977,10044702
x1,89:9458808,10044702
k1,88:9617033,10044702:158225
x1,88:10596795,10044702
x1,88:10831413,10044702
x1,88:11439586,10044702
x1,88:11956664,10044702
x1,88:12191282,10044702
x1,88:12634304,10044702
x1,88:13578676,10044702
k1,88:13736902,10044702:158226
x1,88:14276918,10044702
k1,88:14435143,10044702:158225
x1,88:14920764,10044702
x1,88:16038150,10044702
k1,88:16196376,10044702:158226
x1,88:16778990,10044702
k1,88:16937215,10044702:158225
x1,88:18218442,10044702
k1,88:18376668,10044702:158226
x1,88:19259436,10044702
k1,88:19417661,10044702:158225
x1,88:20122171,10044702
x1,88:20791292,10044702
x1,88:21598693,10044702
x1,88:21896881,10044702
k1,88:22055106,10044702:158225
x1,88:23103682,10044702
k1,88:23261908,10044702:158226
x1,88:24121739,10044702
x1,88:24465803,10044702
x1,88:24826251,10044702
x1,88:26376176,10044702
x1,88:27113455,10044702
x1,88:27261566,10044702
k1,88:27497692,10044702:236126
x1,88:27847654,10044702
x1,88:28070475,10044702
x1,88:28970939,10044702
k1,88:29129165,10044702:158226
x1,88:29444393,10044702
k1,88:29602618,10044702:158225
x1,88:30307128,10044702
x1,88:30976249,10044702
x1,88:31783650,10044702
x1,88:32261406,10044702
k1,88:32261406,10044702:0
)
(1,89:7882014,10831134:24379392,562141,148438
x1,89:9351985,10831134
k1,88:9560158,10831134:208173
x1,88:10100174,10831134
k1,88:10308346,10831134:208172
x1,88:11561392,10831134
x1,88:11676080,10831134
k1,88:11902382,10831134:226302
x1,88:12996178,10831134
x1,88:13713141,10831134
x1,88:14338354,10831134
x1,88:14572972,10831134
x1,88:14753195,10831134
x1,88:15708708,10831134
k1,88:15916880,10831134:208172
x1,88:17209903,10831134
k1,88:17418076,10831134:208173
x1,88:17996103,10831134
k1,88:18204276,10831134:208173
x1,88:19087044,10831134
k1,88:19295216,10831134:208172
x1,88:19890282,10831134
x1,88:20206820,10831134
k1,88:20414993,10831134:208173
x1,88:20841631,10831134
x1,88:21320698,10831134
x1,88:22424323,10831134
k1,88:22632496,10831134:208173
x1,88:23302929,10831134
x1,88:23973361,10831134
x1,88:24962299,10831134
k1,88:25170471,10831134:208172
x1,88:25536817,10831134
x1,88:26979262,10831134
$1,88:27044798,10831134
(1,88:27044798,10593239:596586,324246,58025
x1,88:27205177,10593239
(1,88:27205177,10593239:243060,306813,2489
x1,88:27448237,10593239
)
x1,88:27608616,10593239
)
$1,88:27641384,10831134
x1,88:27801292,10831134
k1,88:28027594,10831134:226302
x1,88:28454232,10831134
x1,88:29298990,10831134
x1,88:30454388,10831134
k1,88:30662560,10831134:208172
x1,88:31202576,10831134
k1,88:31410749,10831134:208173
x1,88:32024821,10831134
x1,88:32261406,10831134
k1,89:32261406,10831134:0
)
(1,89:7882014,11617566:24379392,562141,148438
x1,89:8454797,11617566
x1,89:8770025,11617566
x1,89:9822531,11617566
$1,88:9888067,11617566
(1,88:9888067,11379671:596586,324246,58025
x1,88:10048446,11379671
(1,88:10048446,11379671:243060,306813,0
x1,88:10291506,11379671
)
x1,88:10451885,11379671
)
$1,88:10484653,11617566
x1,88:10644561,11617566
k1,88:10813112,11617566:168551
x1,88:11861688,11617566
k1,88:12023660,11617566:161972
x1,88:12646906,11617566
x1,88:12994902,11617566
x1,88:14068380,11617566
x1,88:14302998,11617566
x1,88:14782065,11617566
k1,88:14944037,11617566:161972
x1,88:16037833,11617566
x1,88:16754796,11617566
x1,88:17380009,11617566
x1,88:17614627,11617566
x1,88:18307340,11617566
k1,88:18469313,11617566:161973
x1,88:19646338,11617566
k1,88:19808310,11617566:161972
x1,88:20356846,11617566
x1,88:21691813,11617566
k1,88:21853785,11617566:161972
x1,88:22196538,11617566
x1,88:22597617,11617566
x1,88:23053092,11617566
x1,88:23311959,11617566
x1,88:23460070,11617566
k1,88:23707437,11617566:247367
x1,88:24095410,11617566
x1,88:24393598,11617566
x1,88:25256705,11617566
x1,88:25605356,11617566
x1,88:26467153,11617566
k1,88:26629125,11617566:161972
x1,88:27488956,11617566
x1,88:27833020,11617566
x1,88:28193468,11617566
x1,88:29743393,11617566
x1,88:30480672,11617566
x1,88:30634681,11617566
k1,88:30803232,11617566:168551
x1,88:31145985,11617566
x1,88:31547064,11617566
x1,88:32002539,11617566
x1,88:32261406,11617566
k1,88:32261406,11617566:0
)
(1,89:7882014,12403998:24379392,562141,148438
x1,89:8868986,12403998
k1,88:8995177,12403998:126191
x1,88:9665610,12403998
k1,88:9791800,12403998:126190
x1,88:10340336,12403998
x1,88:12035751,12403998
k1,88:12161942,12403998:126191
x1,88:12522390,12403998
x1,88:12812713,12403998
k1,88:12938904,12403998:126191
x1,88:13380615,12403998
x1,88:14062844,12403998
x1,88:15521019,12403998
k1,88:15647210,12403998:126191
x1,88:17238422,12403998
k1,88:17364612,12403998:126190
x1,88:18269008,12403998
x1,88:18554744,12403998
x1,88:18861452,12403998
x1,88:20570629,12403998
$1,88:20636165,12403998
(1,88:20636165,12166103:596586,324246,58025
x1,88:20796544,12166103
(1,88:20796544,12166103:243060,306813,2489
x1,88:21039604,12166103
)
x1,88:21199983,12166103
)
$1,88:21232751,12403998
k1,88:21358942,12403998:126191
x1,88:22407518,12403998
k1,88:22533709,12403998:126191
x1,88:23416477,12403998
k1,88:23542667,12403998:126190
x1,88:24258319,12403998
x1,88:24703308,12403998
k1,88:24829499,12403998:126191
x1,88:25768629,12403998
x1,88:26083857,12403998
x1,88:26318475,12403998
x1,88:26627804,12403998
x1,88:27731429,12403998
k1,88:27857620,12403998:126191
x1,88:28379941,12403998
k1,88:28506132,12403998:126191
x1,88:29726409,12403998
k1,88:29852599,12403998:126190
x1,88:30540727,12403998
x1,88:31595199,12403998
k1,88:31721390,12403998:126191
x1,88:32261406,12403998
k1,88:32261406,12403998:0
)
(1,89:7882014,13190430:24379392,449576,3276
x1,89:8404335,13190430
x1,89:9701291,13190430
k1,89:32261407,13190430:22560116
g1,89:32261407,13190430
)
(1,91:7882014,13976862:24379392,562141,148438
h1,90:7882014,13976862:655360,0,0
x1,90:8925347,13976862
x1,90:10412357,13976862
k1,90:10606051,13976862:193694
x1,90:11154587,13976862
x1,90:11458673,13976862
x1,90:12028180,13976862
x1,90:12410909,13976862
x1,90:13039398,13976862
x1,90:14405822,13976862
k1,90:14599517,13976862:193695
x1,90:14959965,13976862
x1,90:15250288,13976862
k1,90:15443982,13976862:193694
x1,90:15805740,13976862
x1,90:16545640,13976862
x1,90:17172163,13976862
k1,90:17380367,13976862:208204
x1,90:17949219,13976862
x1,90:19647908,13976862
x1,90:19771771,13976862
k1,90:19979974,13976862:208203
x1,90:20367947,13976862
x1,90:21086876,13976862
x1,90:22351720,13976862
k1,90:22559923,13976862:208203
x1,90:22914473,13976862
x1,90:23935522,13976862
k1,90:24129217,13976862:193695
x1,90:24646295,13976862
k1,90:24839989,13976862:193694
x1,90:25483552,13976862
$1,90:25549088,13976862
(1,90:25549088,13738967:4120956,324246,64500
x1,90:25709467,13738967
(1,90:25709467,13738967:243060,306813,2489
x1,90:25952527,13738967
)
x1,90:26074057,13738967
(1,90:26074057,13738967:243060,306813,2489
x1,90:26317117,13738967
)
x1,90:26438647,13738967
(1,90:26438647,13738967:243060,306813,2489
x1,90:26681707,13738967
)
x1,90:26803237,13738967
(1,90:26803237,13738967:243060,306813,2489
x1,90:27046297,13738967
)
x1,90:27167827,13738967
(1,90:27167827,13738967:486120,306813,2489
x1,90:27653947,13738967
)
x1,90:27775477,13738967
(1,90:27775477,13738967:486120,306813,0
x1,90:28261597,13738967
)
x1,90:28383127,13738967
(1,90:28383127,13738967:486120,306813,0
x1,90:28869247,13738967
)
x1,90:28990777,13738967
(1,90:28990777,13738967:486120,306813,2489
x1,90:29476897,13738967
)
x1,90:29637276,13738967
)
$1,90:29670044,13976862
k1,90:29863739,13976862:193695
x1,90:30848743,13976862
x1,90:31155451,13976862
k1,90:31349145,13976862:193694
x1,90:32024821,13976862
x1,90:32261406,13976862
k1,91:32261406,13976862:0
)
(1,91:7882014,14763294:24379392,449576,148438
x1,91:8477080,14763294
x1,91:9971299,14763294
k1,90:10112614,14763294:141315
x1,90:10995382,14763294
k1,90:11136696,14763294:141314
x1,90:11479449,14763294
x1,90:11880528,14763294
x1,90:12336003,14763294
k1,90:12477312,14763294:141309
x1,90:13017328,14763294
k1,90:13158643,14763294:141315
x1,90:13473871,14763294
k1,90:13615185,14763294:141314
x1,90:15080569,14763294
k1,90:15221884,14763294:141315
x1,90:16075162,14763294
x1,90:16855694,14763294
k1,90:16997003,14763294:141309
x1,90:18276263,14763294
k1,90:18417577,14763294:141314
x1,90:18908441,14763294
x1,90:19143059,14763294
x1,90:20191633,14763294
k1,90:20377027,14763294:185394
x1,90:21999696,14763294
k1,90:22141011,14763294:141315
x1,90:23337041,14763294
x1,90:24085461,14763294
k1,90:24226775,14763294:141314
x1,90:25093160,14763294
x1,90:25975929,14763294
x1,90:26262976,14763294
x1,90:26929477,14763294
k1,90:27070792,14763294:141315
x1,90:28443115,14763294
k1,90:28584429,14763294:141314
x1,90:29530112,14763294
x1,90:30381424,14763294
k1,90:30522739,14763294:141315
x1,90:31125669,14763294
x1,90:31802000,14763294
x1,90:32036618,14763294
x1,90:32261406,14763294
k1,91:32261406,14763294:0
)
(1,91:7882014,15549726:24379392,449576,148438
x1,91:8057650,15549726
x1,91:9766827,15549726
k1,90:9943507,15549726:176680
x1,90:10992083,15549726
k1,90:11168763,15549726:176680
x1,90:12372003,15549726
x1,90:13104039,15549726
x1,90:13626360,15549726
x1,90:15213640,15549726
k1,90:15390320,15549726:176680
x1,90:16659750,15549726
k1,90:16836430,15549726:176680
x1,90:17196878,15549726
x1,90:18746803,15549726
x1,90:19484082,15549726
k1,90:19660762,15549726:176680
x1,90:21314888,15549726
k1,90:21491527,15549726:176639
x1,90:22663310,15549726
x1,90:23804290,15549726
k1,90:23980970,15549726:176680
x1,90:24520986,15549726
k1,90:24697666,15549726:176680
x1,90:25385794,15549726
k1,90:25562474,15549726:176680
x1,90:26053338,15549726
x1,90:26287956,15549726
x1,90:27176622,15549726
k1,90:27353302,15549726:176680
x1,90:27875623,15549726
k1,90:28052303,15549726:176680
x1,90:28935071,15549726
k1,90:29111751,15549726:176680
x1,90:29553462,15549726
x1,90:30235691,15549726
x1,90:30674126,15549726
x1,90:32261406,15549726
k1,90:32261406,15549726:0
)
(1,91:7882014,16336158:24379392,449576,148438
x1,91:8269987,16336158
x1,90:10386142,16336158
k1,90:10547061,16336158:160919
x1,90:11842051,16336158
x1,90:12747102,16336158
k1,90:12908021,16336158:160919
x1,90:13142639,16336158
x1,90:14796109,16336158
x1,90:14944220,16336158
k1,90:15188426,16336158:244206
x1,90:16238311,16336158
k1,90:16399230,16336158:160919
x1,90:16633848,16336158
x1,90:16932036,16336158
x1,90:18054666,16336158
x1,90:19514805,16336158
k1,90:19675723,16336158:160918
x1,90:20384167,16336158
x1,90:21191569,16336158
x1,90:21506796,16336158
x1,90:22173952,16336158
k1,90:22334871,16336158:160919
x1,90:22677624,16336158
x1,90:23078703,16336158
x1,90:23534178,16336158
x1,90:23793045,16336158
k1,90:23953964,16336158:160919
x1,90:25165722,16336158
k1,90:25326641,16336158:160919
x1,90:26797922,16336158
k1,90:26958840,16336158:160918
x1,90:27513929,16336158
k1,90:27674848,16336158:160919
x1,90:28393121,16336158
x1,90:29012435,16336158
k1,90:29173354,16336158:160919
x1,90:30044982,16336158
x1,90:30755391,16336158
x1,90:32261406,16336158
k1,90:32261406,16336158:0
)
(1,91:7882014,17122590:24379392,449576,148438
x1,91:8552447,17122590
x1,91:9962126,17122590
x1,91:10823923,17122590
k1,90:10971568,17122590:147645
x1,90:11692464,17122590
k1,90:11840109,17122590:147645
x1,90:12376193,17122590
x1,90:13070219,17122590
x1,90:13304837,17122590
x1,90:14183018,17122590
k1,90:14330664,17122590:147646
x1,90:14718637,17122590
x1,90:16834792,17122590
k1,90:16982437,17122590:147645
x1,90:18277427,17122590
x1,90:19445277,17122590
x1,90:19599286,17122590
k1,90:19749928,17122590:150642
x1,90:20798504,17122590
k1,90:20946149,17122590:147645
x1,90:22401701,17122590
k1,90:22549346,17122590:147645
x1,90:22892099,17122590
x1,90:23293178,17122590
x1,90:23748653,17122590
x1,90:24007520,17122590
k1,90:24155165,17122590:147645
x1,90:24618504,17122590
x1,90:25159175,17122590
x1,90:25457363,17122590
k1,90:25605008,17122590:147645
x1,90:26496296,17122590
x1,90:28348997,17122590
k1,90:28496643,17122590:147646
x1,90:29051732,17122590
k1,90:29199377,17122590:147645
x1,90:29869810,17122590
k1,90:30017455,17122590:147645
x1,90:30565991,17122590
x1,90:32261406,17122590
k1,90:32261406,17122590:0
)
(1,91:7882014,17909022:24379392,544708,148438
x1,91:8242462,17909022
x1,90:8532785,17909022
k1,90:8725414,17909022:192629
x1,90:9765469,17909022
x1,90:9941105,17909022
x1,90:10863851,17909022
k1,90:11056479,17909022:192628
x1,90:11995609,17909022
x1,90:12310837,17909022
x1,90:12545455,17909022
x1,90:12854784,17909022
x1,90:14118317,17909022
k1,90:14457653,17909022:339336
x1,90:14831863,17909022
x1,90:15017329,17909022
x1,90:15962357,17909022
x1,90:16446012,17909022
x1,90:18033292,17909022
k1,90:18225920,17909022:192628
x1,90:18613893,17909022
x1,90:20730048,17909022
k1,90:20922677,17909022:192629
x1,90:22217667,17909022
x1,90:23385517,17909022
k1,90:23578145,17909022:192628
x1,90:24118161,17909022
k1,90:24310790,17909022:192629
$1,90:24310790,17909022
x1,90:24950420,17909022
(1,90:24950420,17671127:275828,306813,0
x1,90:25193480,17671127
)
k1,90:25394535,17909022:168287
x1,90:25828383,17909022
k1,90:25996671,17909022:168288
x1,90:26402339,17909022
x1,90:26728708,17909022
k1,90:26908136,17909022:168287
x1,90:27341984,17909022
k1,90:27510271,17909022:168287
x1,90:28149901,17909022
(1,90:28149901,17671127:275828,306813,2489
x1,90:28392961,17671127
)
$1,90:28425729,17909022
k1,90:28618358,17909022:192629
x1,90:29168204,17909022
x1,90:29466392,17909022
k1,90:29659021,17909022:192629
x1,90:30695800,17909022
x1,90:31513689,17909022
k1,90:31706317,17909022:192628
x1,90:32261406,17909022
k1,90:32261406,17909022:0
)
(1,91:7882014,18695454:24379392,449576,148438
x1,91:8552447,18695454
k1,90:8705491,18695454:153044
x1,90:10399592,18695454
k1,90:10552636,18695454:153044
x1,90:11646432,18695454
x1,90:12363395,18695454
x1,90:13223226,18695454
x1,90:13389032,18695454
k1,90:13550768,18695454:161736
x1,90:14843790,18695454
k1,90:14996834,18695454:153044
x1,90:15976596,18695454
x1,90:16211214,18695454
x1,90:16819387,18695454
x1,90:17336465,18695454
x1,90:17571083,18695454
x1,90:18014105,18695454
x1,90:18958477,18695454
k1,90:19111521,18695454:153044
x1,90:20288546,18695454
k1,90:20441590,18695454:153044
x1,90:20676208,18695454
x1,90:20974396,18695454
x1,90:21978405,18695454
k1,90:22131449,18695454:153044
x1,90:22679985,18695454
k1,90:22833028,18695454:153043
x1,90:24036268,18695454
x1,90:25173971,18695454
k1,90:25327015,18695454:153044
x1,90:26069536,18695454
x1,90:27344865,18695454
k1,90:27497909,18695454:153044
x1,90:28539930,18695454
x1,90:29817226,18695454
x1,90:30815339,18695454
k1,90:30968383,18695454:153044
x1,90:32261406,18695454
k1,90:32261406,18695454:0
)
(1,91:7882014,19481886:24379392,449576,148438
x1,91:8460041,19481886
k1,90:8607839,19481886:147798
x1,90:9647894,19481886
x1,90:9823530,19481886
x1,90:10746276,19481886
k1,90:10894074,19481886:147798
x1,90:12701556,19481886
x1,90:13251402,19481886
x1,90:13567940,19481886
k1,90:13715738,19481886:147798
x1,90:14504790,19481886
x1,90:15045461,19481886
k1,90:15193259,19481886:147798
x1,90:16132389,19481886
x1,90:16447617,19481886
x1,90:16682235,19481886
x1,90:16991564,19481886
x1,90:18255097,19481886
k1,90:18405930,19481886:150833
x1,90:18847641,19481886
x1,90:19529870,19481886
x1,90:19968305,19481886
x1,90:21071930,19481886
k1,90:21219728,19481886:147798
x1,90:21759744,19481886
k1,90:21907543,19481886:147799
x1,90:22790311,19481886
k1,90:22938109,19481886:147798
x1,90:23978164,19481886
x1,90:24153800,19481886
x1,90:25076546,19481886
k1,90:25224344,19481886:147798
x1,90:26712664,19481886
k1,90:26860462,19481886:147798
x1,90:27649514,19481886
x1,90:28190185,19481886
x1,90:28314048,19481886
k1,90:28464881,19481886:150833
x1,90:29513457,19481886
k1,90:29661255,19481886:147798
x1,90:30376907,19481886
x1,90:30821896,19481886
k1,90:30969694,19481886:147798
x1,90:31204312,19481886
x1,90:32024821,19481886
x1,90:32261406,19481886
k1,91:32261406,19481886:0
)
(1,91:7882014,20268318:24379392,562141,3276
x1,91:9068869,20268318
x1,91:10675155,20268318
$1,90:10740691,20268318
(1,90:10740691,20030423:1447296,324246,64500
x1,90:10901070,20030423
(1,90:10901070,20030423:486120,306813,0
x1,90:11387190,20030423
)
x1,90:11508720,20030423
(1,90:11508720,20030423:486120,306813,2489
x1,90:11994840,20030423
)
x1,90:12155219,20030423
)
$1,90:12187987,20268318
k1,91:32261407,20268318:20073420
g1,91:32261407,20268318
)
(1,97:7882014,21054750:24379392,449576,148438
h1,92:7882014,21054750:655360,0,0
x1,92:9007267,21054750
x1,92:9675733,21054750
k1,92:9862601,21054750:186868
x1,92:10417690,21054750
k1,92:10604557,21054750:186867
x1,92:11487325,21054750
k1,92:11674193,21054750:186868
x1,92:12697865,21054750
x1,92:12983601,21054750
x1,92:13290309,21054750
k1,92:13477177,21054750:186868
x1,92:14716462,21054750
x1,92:16490520,21054750
k1,92:16677388,21054750:186868
x1,92:18371489,21054750
k1,92:18558356,21054750:186867
x1,92:19652152,21054750
x1,92:20369115,21054750
x1,92:21228946,21054750
k1,92:21415814,21054750:186868
x1,92:22275645,21054750
x1,92:22619709,21054750
x1,92:22980157,21054750
x1,92:25004562,21054750
k1,92:25191430,21054750:186868
x1,92:26171192,21054750
x1,92:26405810,21054750
x1,92:27013983,21054750
x1,92:27531061,21054750
x1,92:27765679,21054750
x1,92:28208701,21054750
x1,92:29153073,21054750
k1,92:29339940,21054750:186867
x1,92:29879956,21054750
k1,92:30066824,21054750:186868
x1,92:30409577,21054750
x1,92:30810656,21054750
x1,92:31266131,21054750
x1,92:31524998,21054750
x1,92:31679007,21054750
k1,92:31878677,21054750:199670
x1,92:32261406,21054750
k1,92:32261406,21054750:0
)
(1,97:7882014,21841182:24379392,449576,148438
x1,97:8320449,21841182
k1,92:8492398,21841182:171949
x1,92:8727016,21841182
x1,92:9324048,21841182
x1,92:10228444,21841182
x1,92:12498610,21841182
k1,92:12670558,21841182:171948
x1,92:13225647,21841182
k1,92:13397596,21841182:171949
x1,92:14417336,21841182
x1,92:15649411,21841182
k1,92:15821359,21841182:171948
x1,92:16993142,21841182
x1,92:18134122,21841182
k1,92:18306071,21841182:171949
x1,92:18934560,21841182
x1,92:19796357,21841182
k1,92:19968306,21841182:171949
x1,92:21062102,21841182
x1,92:21779065,21841182
x1,92:22638896,21841182
k1,92:22810844,21841182:171948
x1,92:24042920,21841182
k1,92:24214832,21841182:171912
x1,92:25298140,21841182
x1,92:26102265,21841182
k1,92:26274214,21841182:171949
x1,92:27567237,21841182
k1,92:27739185,21841182:171948
x1,92:28317212,21841182
k1,92:28489161,21841182:171949
x1,92:28959709,21841182
x1,92:30280912,21841182
x1,92:30505700,21841182
x1,92:30832069,21841182
x1,92:32261406,21841182
k1,92:32261406,21841182:0
)
(1,97:7882014,22627614:24379392,449576,148438
x1,97:9114090,22627614
x1,92:9237953,22627614
k1,92:9468054,22627614:230101
x1,92:9949088,22627614
x1,92:10278734,22627614
x1,92:10723723,22627614
x1,92:11333862,22627614
x1,92:11875188,22627614
x1,92:11999051,22627614
k1,92:12252763,22627614:253712
x1,92:13135531,22627614
k1,92:13365632,22627614:230101
x1,92:14635062,22627614
k1,92:14865163,22627614:230101
x1,92:15569673,22627614
x1,92:16238794,22627614
x1,92:17046195,22627614
x1,92:17344383,22627614
k1,92:17574484,22627614:230101
x1,92:18123020,22627614
x1,92:18640098,22627614
x1,92:18874716,22627614
x1,92:19482889,22627614
x1,92:20586514,22627614
k1,92:20816615,22627614:230101
x1,92:22125366,22627614
k1,92:22355372,22627614:230006
x1,92:23527155,22627614
x1,92:24533786,22627614
k1,92:24763887,22627614:230101
x1,92:25776417,22627614
x1,92:26981623,22627614
k1,92:27211724,22627614:230101
x1,92:28423482,22627614
k1,92:28653583,22627614:230101
x1,92:29902697,22627614
k1,92:30132798,22627614:230101
x1,92:30841242,22627614
x1,92:32261406,22627614
k1,92:32261406,22627614:0
)
(1,97:7882014,23414046:24379392,449576,148438
x1,97:8352562,23414046
x1,92:9673765,23414046
x1,92:9898553,23414046
x1,92:10224922,23414046
x1,92:11654259,23414046
k1,92:11861720,23414046:207461
x1,92:13093796,23414046
k1,92:13301184,23414046:207388
x1,92:13535802,23414046
x1,92:13833990,23414046
x1,92:14966449,23414046
x1,92:15527436,23414046
k1,92:15734897,23414046:207461
x1,92:16050125,23414046
k1,92:16257586,23414046:207461
x1,92:17009282,23414046
x1,92:17557818,23414046
x1,92:17925474,23414046
x1,92:19119539,23414046
k1,92:19326999,23414046:207460
x1,92:21492306,23414046
k1,92:21699767,23414046:207461
x1,92:22239783,23414046
k1,92:22447244,23414046:207461
x1,92:23696358,23414046
k1,92:23903819,23414046:207461
x1,92:24952395,23414046
k1,92:25159856,23414046:207461
x1,92:25598291,23414046
k1,92:25805751,23414046:207460
x1,92:27008991,23414046
x1,92:27741027,23414046
x1,92:28263348,23414046
x1,92:29366973,23414046
x1,92:30324452,23414046
k1,92:30531913,23414046:207461
x1,92:31134843,23414046
x1,92:32024821,23414046
x1,92:32261406,23414046
k1,97:32261406,23414046:0
)
(1,97:7882014,24200478:24379392,449576,148438
x1,97:8624535,24200478
x1,97:8931243,24200478
x1,97:9079354,24200478
k1,92:9287509,24200478:208155
x1,92:10404895,24200478
x1,92:11063531,24200478
x1,92:11353854,24200478
k1,92:11547510,24200478:193656
x1,92:12447973,24200478
x1,92:12830702,24200478
x1,92:13692499,24200478
k1,92:13886154,24200478:193655
x1,92:14531682,24200478
k1,92:14725338,24200478:193656
x1,92:15663812,24200478
k1,92:15857468,24200478:193656
x1,92:16406004,24200478
k1,92:16599659,24200478:193655
x1,92:17459490,24200478
x1,92:18113539,24200478
x1,92:18859993,24200478
x1,92:19541566,24200478
k1,92:19735222,24200478:193656
x1,92:20907005,24200478
x1,92:22047985,24200478
x1,92:22196096,24200478
k1,92:22538513,24200478:342417
x1,92:22904203,24200478
x1,92:23193870,24200478
x1,92:23873478,24200478
k1,92:24067134,24200478:193656
x1,92:26032554,24200478
k1,92:26226210,24200478:193656
x1,92:27429450,24200478
x1,92:28368579,24200478
x1,92:29230376,24200478
k1,92:29424031,24200478:193655
x1,92:30138373,24200478
x1,92:30583362,24200478
x1,92:31124033,24200478
k1,92:31317689,24200478:193656
x1,92:32261406,24200478
k1,92:32261406,24200478:0
)
(1,97:7882014,24986910:24379392,449576,148438
x1,97:8429893,24986910
x1,92:8773957,24986910
x1,92:9591846,24986910
k1,92:9817225,24986910:225379
x1,92:10420155,24986910
x1,92:11134497,24986910
x1,92:12190282,24986910
x1,92:13530490,24986910
k1,92:13755870,24986910:225380
x1,92:14304406,24986910
k1,92:14529785,24986910:225379
x1,92:15412553,24986910
k1,92:15637933,24986910:225380
x1,92:16591480,24986910
k1,92:16816859,24986910:225379
x1,92:17782203,24986910
k1,92:18007583,24986910:225380
x1,92:20225320,24986910
x1,92:20379329,24986910
k1,92:20627139,24986910:247810
x1,92:21509907,24986910
k1,92:21735286,24986910:225379
x1,92:22938526,24986910
x1,92:23670562,24986910
x1,92:24192883,24986910
x1,92:25780163,24986910
k1,92:26005543,24986910:225380
x1,92:27254657,24986910
k1,92:27480036,24986910:225379
x1,92:27714654,24986910
x1,92:28012842,24986910
x1,92:29145301,24986910
x1,92:29803937,24986910
k1,92:30029317,24986910:225380
x1,92:30803951,24986910
k1,92:31029330,24986910:225379
x1,92:32261406,24986910
k1,92:32261406,24986910:0
)
(1,97:7882014,25773342:24379392,449576,148438
x1,97:8430550,25773342
k1,92:8619514,25773342:188964
x1,92:9502282,25773342
k1,92:9691247,25773342:188965
x1,92:10551078,25773342
x1,92:11205127,25773342
x1,92:11951581,25773342
x1,92:12633154,25773342
k1,92:12822118,25773342:188964
x1,92:14028634,25773342
k1,92:14217599,25773342:188965
x1,92:14656034,25773342
k1,92:14844998,25773342:188964
x1,92:15827380,25773342
k1,92:16016345,25773342:188965
x1,92:16326330,25773342
x1,92:16619275,25773342
x1,92:17483694,25773342
x1,92:18226215,25773342
x1,92:18532923,25773342
x1,92:18681034,25773342
k1,92:19009377,25773342:328343
x1,92:19578229,25773342
x1,92:20564545,25773342
k1,92:20753510,25773342:188965
x1,92:20988128,25773342
x1,92:21286316,25773342
x1,92:22408946,25773342
x1,92:23869085,25773342
k1,92:24058049,25773342:188964
x1,92:25043053,25773342
x1,92:25349761,25773342
k1,92:25538726,25773342:188965
x1,92:26061047,25773342
x1,92:28378397,25773342
k1,92:28567361,25773342:188964
x1,92:29122450,25773342
k1,92:29311415,25773342:188965
x1,92:29546033,25773342
x1,92:29844221,25773342
x1,92:31179188,25773342
k1,92:31368152,25773342:188964
x1,92:31602770,25773342
x1,92:32261406,25773342
k1,92:32261406,25773342:0
)
(1,97:7882014,26559774:24379392,449576,148438
x1,97:9085254,26559774
x1,97:9817290,26559774
x1,97:10339611,26559774
x1,97:11926891,26559774
k1,92:12094670,26559774:167779
x1,92:13343784,26559774
k1,92:13511562,26559774:167778
x1,92:13872010,26559774
x1,92:14162333,26559774
k1,92:14330112,26559774:167779
x1,92:15196497,26559774
x1,92:16079266,26559774
x1,92:17228110,26559774
k1,92:17395889,26559774:167779
x1,92:18278657,26559774
k1,92:18446435,26559774:167778
x1,92:18681053,26559774
x1,92:20911241,26559774
x1,92:21493855,26559774
x1,92:22387109,26559774
k1,92:22554888,26559774:167779
x1,92:24298144,26559774
k1,92:24465922,26559774:167778
x1,92:25064920,26559774
x1,92:26289785,26559774
k1,92:26457532,26559774:167747
x1,92:27506108,26559774
k1,92:27673886,26559774:167778
x1,92:28355460,26559774
x1,92:28590078,26559774
x1,92:29067834,26559774
x1,92:29714673,26559774
k1,92:29882452,26559774:167779
x1,92:31085692,26559774
x1,92:32024821,26559774
x1,92:32261406,26559774
k1,97:32261406,26559774:0
)
(1,97:7882014,27346206:24379392,562141,148438
x1,97:8903719,27346206
$1,92:8969255,27346206
(1,92:8969255,27108311:1447296,324246,64500
x1,92:9129634,27108311
(1,92:9129634,27108311:486120,306813,2489
x1,92:9615754,27108311
)
x1,92:9737284,27108311
(1,92:9737284,27108311:486120,306813,2489
x1,92:10223404,27108311
)
x1,92:10383783,27108311
)
$1,92:10416551,27346206
k1,92:10597512,27346206:180961
x1,92:11078546,27346206
x1,92:11408192,27346206
x1,92:11853181,27346206
x1,92:12463320,27346206
x1,92:13004646,27346206
x1,92:13128509,27346206
k1,92:13320795,27346206:192286
x1,92:14002369,27346206
x1,92:14236987,27346206
x1,92:14714743,27346206
x1,92:15361582,27346206
k1,92:15542543,27346206:180961
x1,92:16745783,27346206
x1,92:17684912,27346206
x1,92:18546709,27346206
k1,92:18727670,27346206:180961
x1,92:19166105,27346206
k1,92:19347066,27346206:180961
x1,92:20275055,27346206
k1,92:20456016,27346206:180961
x1,92:21070088,27346206
x1,92:21751662,27346206
x1,92:22590522,27346206
k1,92:22771483,27346206:180961
x1,92:23311499,27346206
k1,92:23492459,27346206:180960
x1,92:23727077,27346206
x1,92:24025265,27346206
x1,92:25050247,27346206
x1,92:25912044,27346206
k1,92:26093005,27346206:180961
x1,92:26975773,27346206
k1,92:27156734,27346206:180961
x1,92:27711823,27346206
x1,92:28402571,27346206
k1,92:28583532,27346206:180961
x1,92:29197604,27346206
x1,92:29862138,27346206
x1,92:30784228,27346206
x1,92:31267883,27346206
x1,92:31954698,27346206
x1,92:32261406,27346206
k1,92:32261406,27346206:0
)
(1,97:7882014,28132638:24379392,449576,135003
x1,97:9085254,28132638
x1,97:9817290,28132638
x1,97:10339611,28132638
x1,97:11926891,28132638
k1,92:12094760,28132638:167869
x1,92:12329378,28132638
x1,92:12627566,28132638
x1,92:13838669,28132638
x1,92:14858408,28132638
k1,92:15042382,28132638:183974
x1,92:15277000,28132638
x1,92:16703715,28132638
k1,92:16871585,28132638:167870
x1,92:17254314,28132638
k1,92:17422183,28132638:167869
x1,92:17656801,28132638
x1,92:17954989,28132638
x1,92:19552755,28132638
k1,92:19720624,28132638:167869
x1,92:20603392,28132638
k1,92:20771261,28132638:167869
x1,92:21974501,28132638
x1,92:22706537,28132638
x1,92:23228858,28132638
x1,92:24816138,28132638
k1,92:24984007,28132638:167869
x1,92:26233121,28132638
k1,92:26400991,28132638:167870
x1,92:27195941,28132638
k1,92:27363810,28132638:167869
x1,92:27802245,28132638
x1,92:28892762,28132638
x1,92:29415083,28132638
x1,92:30097968,28132638
x1,92:31074453,28132638
k1,92:31242322,28132638:167869
x1,92:32024821,28132638
x1,92:32261406,28132638
k1,97:32261406,28132638:0
)
(1,97:7882014,28919070:24379392,449576,148438
x1,97:8546548,28919070
x1,97:9030203,28919070
x1,97:10396627,28919070
k1,92:10528514,28919070:131887
x1,92:11377204,28919070
x1,92:12246866,28919070
k1,92:12378753,28919070:131887
x1,92:13469270,28919070
x1,92:13851999,28919070
x1,92:14696757,28919070
k1,92:14828645,28919070:131888
x1,92:16079725,28919070
x1,92:16318275,28919070
x1,92:16466386,28919070
k1,92:16633555,28919070:167169
x1,92:17045776,28919070
x1,92:17759463,28919070
x1,92:18063549,28919070
x1,92:19651483,28919070
x1,92:19760272,28919070
k1,92:19892914,28919070:132642
x1,92:20280887,28919070
x1,92:21294727,28919070
k1,92:21426610,28919070:131883
x1,92:21661228,28919070
x1,92:21959416,28919070
x1,92:23557182,28919070
k1,92:23689070,28919070:131888
x1,92:24571838,28919070
k1,92:24703725,28919070:131887
x1,92:25051721,28919070
x1,92:25286339,28919070
x1,92:26179593,28919070
k1,92:26311480,28919070:131887
x1,92:26851496,28919070
k1,92:26983383,28919070:131887
x1,92:27866151,28919070
k1,92:27998038,28919070:131887
x1,92:28829033,28919070
x1,92:30062419,28919070
k1,92:30195061,28919070:132642
x1,92:31312447,28919070
x1,92:31971083,28919070
x1,92:32261406,28919070
k1,92:32261406,28919070:0
)
(1,97:7882014,29705502:24379392,449576,148438
x1,97:8418098,29705502
x1,97:9523034,29705502
x1,97:10327159,29705502
x1,97:11188956,29705502
k1,92:11369886,29705502:180930
x1,92:12252654,29705502
k1,92:12433584,29705502:180930
x1,92:13636824,29705502
x1,92:14368860,29705502
x1,92:14891181,29705502
x1,92:16478461,29705502
k1,92:16659391,29705502:180930
x1,92:17908505,29705502
x1,92:18056616,29705502
k1,92:18360856,29705502:304240
x1,92:18773077,29705502
x1,92:19486764,29705502
x1,92:20059548,29705502
x1,92:22145555,29705502
x1,92:22254344,29705502
k1,92:22446592,29705502:192248
x1,92:22834565,29705502
x1,92:23848405,29705502
k1,92:24029289,29705502:180884
x1,92:24973006,29705502
k1,92:25153936,29705502:180930
x1,92:26507254,29705502
k1,92:26688184,29705502:180930
x1,92:27302256,29705502
x1,92:27989071,29705502
x1,92:28769603,29705502
k1,92:28950533,29705502:180930
x1,92:29499069,29705502
x1,92:29803155,29705502
x1,92:30372662,29705502
x1,92:30755391,29705502
x1,92:32261406,29705502
k1,92:32261406,29705502:0
)
(1,97:7882014,30491934:24379392,449576,148438
x1,97:9302178,30491934
k1,92:9486217,30491934:184039
x1,92:10765477,30491934
k1,92:10949516,30491934:184039
x1,92:11498052,30491934
k1,92:11682090,30491934:184038
x1,92:12541921,30491934
x1,92:13195970,30491934
x1,92:13942424,30491934
x1,92:14623997,30491934
k1,92:14808036,30491934:184039
x1,92:16277351,30491934
k1,92:16461390,30491934:184039
x1,92:17039417,30491934
k1,92:17223456,30491934:184039
x1,92:17686795,30491934
x1,92:18329702,30491934
k1,92:18513741,30491934:184039
x1,92:19091768,30491934
k1,92:19275806,30491934:184038
x1,92:20158574,30491934
k1,92:20342613,30491934:184039
x1,92:21202444,30491934
x1,92:21546508,30491934
x1,92:21906956,30491934
x1,92:24091269,30491934
k1,92:24287403,30491934:196134
x1,92:25170172,30491934
x1,92:25704289,30491934
x1,92:26967822,30491934
k1,92:27163956,30491934:196134
x1,92:28390789,30491934
x1,92:28566425,30491934
x1,92:29508832,30491934
k1,92:29704965,30491934:196133
x1,92:30753541,30491934
k1,92:30937580,30491934:184039
x1,92:32024821,30491934
x1,92:32261406,30491934
k1,97:32261406,30491934:0
)
(1,97:7882014,31278366:24379392,449576,148438
x1,97:8323725,31278366
x1,97:9515169,31278366
k1,92:9717610,31278366:202441
x1,92:11186925,31278366
x1,92:11335036,31278366
k1,92:11703808,31278366:368772
x1,92:12184842,31278366
x1,92:12822505,31278366
k1,92:13024945,31278366:202440
x1,92:13542023,31278366
k1,92:13744464,31278366:202441
x1,92:14388027,31278366
k1,92:14756799,31278366:368772
x1,92:15741803,31278366
x1,92:16048511,31278366
k1,92:16250951,31278366:202440
x1,92:16933836,31278366
x1,92:17919497,31278366
x1,92:18223583,31278366
x1,92:18802920,31278366
x1,92:19461556,31278366
k1,92:19663997,31278366:202441
x1,92:20219086,31278366
k1,92:20421527,31278366:202441
x1,92:21103101,31278366
x1,92:21943271,31278366
k1,92:22145711,31278366:202440
x1,92:22533684,31278366
x1,92:23547524,31278366
k1,92:23749898,31278366:202374
x1,92:24304987,31278366
k1,92:24507427,31278366:202440
x1,92:25367258,31278366
x1,92:26021307,31278366
x1,92:26767761,31278366
x1,92:27449334,31278366
k1,92:27651775,31278366:202441
x1,92:28482770,31278366
x1,92:29978955,31278366
k1,92:30214786,31278366:235831
x1,92:31097554,31278366
k1,92:31299995,31278366:202441
x1,92:31726633,31278366
x1,92:32024821,31278366
x1,92:32261406,31278366
k1,97:32261406,31278366:0
)
(1,97:7882014,32064798:24379392,449576,148438
x1,97:9891345,32064798
k1,92:10087107,32064798:195762
x1,92:10795551,32064798
x1,92:12215715,32064798
k1,92:12411478,32064798:195763
x1,92:12754231,32064798
x1,92:13155310,32064798
x1,92:13610785,32064798
k1,92:13806487,32064798:195702
x1,92:14978270,32064798
x1,92:15984901,32064798
k1,92:16180663,32064798:195762
x1,92:16720679,32064798
k1,92:16916441,32064798:195762
x1,92:17231669,32064798
k1,92:17427432,32064798:195763
x1,92:18682445,32064798
x1,92:22100800,32064798
k1,92:22296562,32064798:195762
x1,92:22787426,32064798
x1,92:23022044,32064798
x1,92:23910710,32064798
k1,92:24106473,32064798:195763
x1,92:24901423,32064798
k1,92:25097185,32064798:195762
x1,92:25462875,32064798
x1,92:25821356,32064798
x1,92:26534386,32064798
k1,92:26730148,32064798:195762
x1,92:27962224,32064798
k1,92:28157926,32064798:195702
x1,92:29206502,32064798
k1,92:29402265,32064798:195763
x1,92:30003229,32064798
x1,92:31258242,32064798
k1,92:31454004,32064798:195762
x1,92:31802000,32064798
x1,92:32036618,32064798
x1,92:32261406,32064798
k1,97:32261406,32064798:0
)
(1,97:7882014,32851230:24379392,449576,148438
x1,97:9116054,32851230
x1,97:9464050,32851230
x1,97:10320605,32851230
k1,92:10485368,32851230:164763
x1,92:14852028,32851230
x1,92:15086646,32851230
x1,92:16719801,32851230
k1,92:16884565,32851230:164764
x1,92:17232561,32851230
x1,92:17467179,32851230
x1,92:18360433,32851230
k1,92:18525196,32851230:164763
x1,92:20268452,32851230
k1,92:20433215,32851230:164763
x1,92:22171883,32851230
x1,92:22559856,32851230
x1,92:23784721,32851230
k1,92:23949455,32851230:164734
x1,92:24387890,32851230
k1,92:24552654,32851230:164764
x1,92:25240782,32851230
k1,92:25405545,32851230:164763
x1,92:26008475,32851230
x1,92:26880103,32851230
x1,92:27724861,32851230
k1,92:27889624,32851230:164763
x1,92:28429640,32851230
k1,92:28594404,32851230:164764
x1,92:29887426,32851230
k1,92:30052189,32851230:164763
x1,92:30735074,32851230
x1,92:31720735,32851230
x1,92:32261406,32851230
k1,97:32261406,32851230:0
)
(1,97:7882014,33637662:24379392,562141,148438
x1,97:8727427,33637662
x1,97:8875538,33637662
$1,92:8941074,33637662
(1,92:8941074,33399767:839646,324246,58025
x1,92:9101453,33399767
(1,92:9101453,33399767:486120,306813,2489
x1,92:9587573,33399767
)
x1,92:9747952,33399767
)
$1,92:9780720,33637662
k1,92:9901525,33637662:120805
x1,92:10284255,33637662
x1,92:10637494,33637662
x1,92:11173578,33637662
x1,92:12277203,33637662
x1,92:13234682,33637662
x1,92:13343471,33637662
k1,92:13467247,33637662:123776
x1,92:13810000,33637662
x1,92:14168481,33637662
x1,92:14958189,33637662
k1,92:15078994,33637662:120805
x1,92:15749427,33637662
x1,92:16053513,33637662
x1,92:16528648,33637662
x1,92:17913423,33637662
k1,92:18034229,33637662:120806
x1,92:18916997,33637662
k1,92:19037802,33637662:120805
x1,92:19419877,33637662
x1,92:20880670,33637662
x1,92:21189999,33637662
k1,92:21310804,33637662:120805
x1,92:22193572,33637662
x1,92:22776186,33637662
x1,92:23092724,33637662
k1,92:23213529,33637662:120805
x1,92:24262105,33637662
k1,92:24382910,33637662:120805
x1,92:25910553,33637662
x1,92:26298526,33637662
x1,92:27312366,33637662
k1,92:27433157,33637662:120791
x1,92:27798847,33637662
x1,92:28699310,33637662
x1,92:29239981,33637662
k1,92:29360786,33637662:120805
x1,92:31508398,33637662
x1,92:32024821,33637662
x1,92:32261406,33637662
k1,97:32261406,33637662:0
)
(1,97:7882014,34424094:24379392,562141,148438
x1,97:8848668,34424094
k1,92:9000047,34424094:151379
x1,92:9774681,34424094
k1,92:9926059,34424094:151378
x1,92:10785890,34424094
x1,92:11439939,34424094
x1,92:12186393,34424094
x1,92:12867966,34424094
k1,92:13019345,34424094:151379
x1,92:13850340,34424094
x1,92:15186617,34424094
x1,92:15334728,34424094
$1,92:15400264,34424094
(1,92:15400264,34186199:839646,324246,58025
x1,92:15560643,34186199
(1,92:15560643,34186199:486120,306813,2489
x1,92:16046763,34186199
)
x1,92:16207142,34186199
)
$1,92:16239910,34424094
k1,92:16391288,34424094:151378
x1,92:16850695,34424094
k1,94:16391288,34424094:-3932
x1,94:17964149,34424094
k1,94:18115528,34424094:151379
x1,94:18350146,34424094
x1,94:18648334,34424094
x1,94:19770964,34424094
x1,94:20996485,34424094
k1,94:21147864,34424094:151379
x1,94:21922498,34424094
k1,94:22073876,34424094:151378
x1,94:22762004,34424094
x1,94:23077232,34424094
x1,94:23840725,34424094
x1,94:24702522,34424094
k1,94:24853901,34424094:151379
x1,94:25402437,34424094
x1,94:26605677,34424094
x1,94:27206641,34424094
x1,94:28030427,34424094
x1,94:29044923,34424094
k1,94:29196301,34424094:151378
x1,94:29911953,34424094
x1,94:30619741,34424094
k1,94:30771120,34424094:151379
x1,94:31399609,34424094
x1,94:32261406,34424094
k1,94:32261406,34424094:0
)
(1,97:7882014,35210526:24379392,449576,135003
x1,97:9409657,35210526
x1,97:9797630,35210526
x1,94:10811470,35210526
k1,94:10964293,35210526:152823
x1,94:11427632,35210526
x1,94:11968303,35210526
x1,94:12266491,35210526
k1,94:12419331,35210526:152840
x1,94:13095662,35210526
x1,94:13330280,35210526
x1,94:14109501,35210526
x1,94:15500829,35210526
k1,94:15720798,35210526:219969
x1,94:16082556,35210526
x1,94:16610775,35210526
x1,94:16922726,35210526
k1,94:17075566,35210526:152840
x1,94:17592644,35210526
k1,94:17745484,35210526:152840
x1,94:18389047,35210526
k1,94:18609017,35210526:219970
x1,94:19657593,35210526
k1,94:19810433,35210526:152840
x1,94:20199716,35210526
x1,94:20792815,35210526
x1,94:21987535,35210526
k1,94:22140375,35210526:152840
x1,94:22657453,35210526
k1,94:22810293,35210526:152840
x1,94:23453856,35210526
k1,94:23673826,35210526:219970
x1,94:24405862,35210526
x1,94:25250620,35210526
x1,94:27367431,35210526
k1,94:27520270,35210526:152839
x1,94:29047913,35210526
x1,94:29435886,35210526
x1,94:30449726,35210526
k1,94:30602549,35210526:152823
x1,94:31323445,35210526
k1,94:31476285,35210526:152840
x1,94:32024821,35210526
x1,94:32261406,35210526
k1,97:32261406,35210526:0
)
(1,97:7882014,35996958:24379392,562141,148438
x1,97:9085254,35996958
x1,97:9686218,35996958
x1,97:10510004,35996958
x1,97:11524500,35996958
x1,97:11672611,35996958
k1,94:11796712,35996958:124101
x1,94:12539233,35996958
x1,94:13814562,35996958
k1,94:13935774,35996958:121212
x1,94:14853932,35996958
x1,94:15542058,35996958
k1,94:15663270,35996958:121212
x1,94:16378922,35996958
x1,94:16823911,35996958
x1,94:16935322,35996958
$1,94:17000858,35996958
(1,94:17000858,35759063:1447296,324246,64500
x1,94:17161237,35759063
(1,94:17161237,35759063:486120,306813,2489
x1,94:17647357,35759063
)
x1,94:17768887,35759063
(1,94:17768887,35759063:486120,306813,2489
x1,94:18255007,35759063
)
x1,94:18415386,35759063
)
$1,94:18448154,35996958
k1,94:18569366,35996958:121212
x1,94:19011734,35996958
x1,94:19488180,35996958
x1,94:20556414,35996958
k1,94:20677625,35996958:121211
x1,94:21194703,35996958
k1,94:21315915,35996958:121212
x1,94:21959478,35996958
k1,94:22123090,35996958:163612
x1,94:23108094,35996958
x1,94:23414802,35996958
k1,94:23536013,35996958:121211
x1,94:24463346,35996958
x1,94:25597773,35996958
x1,94:26797734,35996958
k1,94:26918946,35996958:121212
x1,94:27650982,35996958
x1,94:28495740,35996958
x1,94:30612551,35996958
k1,94:30733763,35996958:121212
x1,94:32261406,35996958
k1,97:32261406,35996958:0
)
(1,97:7882014,36783390:24379392,449576,148438
x1,97:8269987,36783390
x1,94:9283827,36783390
k1,94:9484668,36783390:200841
x1,94:10113157,36783390
x1,94:10974954,36783390
k1,94:11175860,36783390:200906
x1,94:12249338,36783390
x1,94:12963680,36783390
x1,94:13198298,36783390
x1,94:13676054,36783390
k1,94:13876960,36783390:200906
x1,94:14523800,36783390
x1,94:14833785,36783390
x1,94:15393462,36783390
x1,94:16757920,36783390
k1,94:16958827,36783390:200907
x1,94:17741326,36783390
x1,94:17916962,36783390
x1,94:18512028,36783390
x1,94:18821357,36783390
x1,94:19924982,36783390
k1,94:20125888,36783390:200906
x1,94:20846784,36783390
k1,94:21047690,36783390:200906
x1,94:21596226,36783390
x1,94:22799466,36783390
x1,94:23400430,36783390
x1,94:24224216,36783390
x1,94:25238712,36783390
k1,94:25439619,36783390:200907
x1,94:26155271,36783390
x1,94:26600260,36783390
k1,94:26801166,36783390:200906
x1,94:27952632,36783390
k1,94:28153538,36783390:200906
x1,94:28468766,36783390
k1,94:28669673,36783390:200907
x1,94:30204523,36783390
x1,94:30502711,36783390
k1,94:30703617,36783390:200906
x1,94:32024821,36783390
x1,94:32261406,36783390
k1,97:32261406,36783390:0
)
(1,97:7882014,37569822:24379392,562141,135003
x1,97:8787065,37569822
$1,94:8852601,37569822
(1,94:8852601,37331927:839646,324246,58025
x1,94:9012980,37331927
(1,94:9012980,37331927:486120,306813,0
x1,94:9499100,37331927
)
x1,94:9659479,37331927
)
$1,94:9692247,37569822
x1,94:9852155,37569822
k1,94:10063820,37569822:211665
x1,94:10274190,37569822
k1,96:10063820,37569822:-14419
x1,96:10466864,37569822
k1,96:10616936,37569822:150072
x1,96:11658302,37569822
k1,96:11808373,37569822:150071
x1,96:12828113,37569822
x1,96:14691955,37569822
k1,96:14842027,37569822:150072
x1,96:15937131,37569822
k1,96:16087202,37569822:150071
x1,96:16475175,37569822
x1,96:17489015,37569822
k1,96:17639073,37569822:150058
x1,96:18077508,37569822
k1,96:18227579,37569822:150071
x1,96:19247319,37569822
x1,96:20046202,37569822
x1,96:20590805,37569822
x1,96:21249441,37569822
k1,96:21399513,37569822:150072
x1,96:21954602,37569822
k1,96:22104673,37569822:150071
x1,96:22339291,37569822
x1,96:22637479,37569822
x1,96:23972446,37569822
k1,96:24122518,37569822:150072
x1,96:25005286,37569822
k1,96:25155358,37569822:150072
x1,96:26358598,37569822
x1,96:27090634,37569822
x1,96:27612955,37569822
x1,96:29200235,37569822
k1,96:29350306,37569822:150071
x1,96:30599420,37569822
k1,96:30749492,37569822:150072
x1,96:32261406,37569822
k1,96:32261406,37569822:0
)
(1,97:7882014,38356254:24379392,449576,148438
x1,97:8570142,38356254
x1,97:8885370,38356254
x1,97:9648863,38356254
x1,97:10510660,38356254
g1,96:10646319,38356254
x1,96:12340420,38356254
g1,96:12476079,38356254
x1,96:13569875,38356254
x1,96:14286838,38356254
x1,96:15146669,38356254
g1,96:15282328,38356254
x1,96:16142159,38356254
x1,96:16796208,38356254
x1,96:17542662,38356254
x1,96:18224235,38356254
g1,96:18359894,38356254
x1,96:19190889,38356254
x1,96:20527166,38356254
x1,96:20681175,38356254
g1,96:20816834,38356254
x1,96:21445323,38356254
x1,96:22307120,38356254
g1,96:22442779,38356254
x1,96:22913327,38356254
x1,96:24234530,38356254
x1,96:24459318,38356254
x1,96:24785687,38356254
x1,96:26215024,38356254
g1,96:26350683,38356254
x1,96:27582759,38356254
x1,96:27706622,38356254
k1,97:32261406,38356254:4554784
g1,97:32261406,38356254
)
(1,99:7882014,39142686:24379392,449576,135003
h1,98:7882014,39142686:655360,0,0
x1,98:9715709,39142686
k1,98:9870903,39142686:155194
x1,98:10552477,39142686
x1,98:11463426,39142686
k1,98:11618620,39142686:155194
x1,98:12219584,39142686
x1,98:13933348,39142686
k1,98:14088542,39142686:155194
x1,98:14971310,39142686
k1,98:15126504,39142686:155194
x1,98:15796937,39142686
x1,98:16101023,39142686
x1,98:16576158,39142686
x1,98:17290500,39142686
x1,98:18736878,39142686
k1,98:18892072,39142686:155194
x1,98:19940648,39142686
k1,98:20095842,39142686:155194
x1,98:20777416,39142686
x1,98:21487825,39142686
x1,98:22101897,39142686
x1,98:23205522,39142686
k1,98:23360716,39142686:155194
x1,98:23900732,39142686
k1,98:24055926,39142686:155194
x1,98:25583569,39142686
x1,98:25971542,39142686
x1,98:26985382,39142686
k1,98:27140556,39142686:155174
x1,98:27915190,39142686
k1,98:28070384,39142686:155194
x1,98:28618920,39142686
x1,98:29822160,39142686
x1,98:30423124,39142686
x1,98:31246910,39142686
x1,98:32261406,39142686
k1,98:32261406,39142686:0
)
(1,99:7882014,39929118:24379392,449576,148438
x1,99:8352562,39929118
x1,98:9673765,39929118
x1,98:9898553,39929118
x1,98:10224922,39929118
x1,98:11654259,39929118
k1,98:11845830,39929118:191571
x1,98:13077906,39929118
x1,98:13201769,39929118
k1,98:13393340,39929118:191571
x1,98:14920983,39929118
x1,98:15308956,39929118
x1,98:16322796,39929118
k1,98:16514310,39929118:191514
x1,98:16952745,39929118
k1,98:17144316,39929118:191571
x1,98:17745280,39929118
x1,98:18043468,39929118
x1,98:18943931,39929118
x1,98:19119567,39929118
x1,98:19807695,39929118
x1,98:20042313,39929118
x1,98:20696360,39929118
k1,98:20887931,39929118:191571
x1,98:21192017,39929118
x1,98:21671740,39929118
x1,98:21847376,39929118
x1,98:23400578,39929118
k1,98:23592149,39929118:191571
x1,98:24220638,39929118
x1,98:25082435,39929118
k1,98:25274006,39929118:191571
x1,98:26156774,39929118
k1,98:26348345,39929118:191571
x1,98:27063997,39929118
x1,98:27508986,39929118
k1,98:27700557,39929118:191571
x1,98:28907073,39929118
k1,98:29098644,39929118:191571
x1,98:29333262,39929118
x1,98:29631450,39929118
x1,98:30651190,39929118
x1,98:31355700,39929118
x1,98:32024821,39929118
x1,98:32261406,39929118
k1,99:32261406,39929118:0
)
(1,99:7882014,40715550:24379392,449576,148438
x1,99:8985639,40715550
k1,98:9180950,40715550:195311
x1,98:9730796,40715550
x1,98:11173898,40715550
k1,98:11369209,40715550:195311
x1,98:11684437,40715550
k1,98:11879748,40715550:195311
x1,98:13466372,40715550
x1,98:14328169,40715550
k1,98:14523480,40715550:195311
x1,98:15844684,40715550
x1,98:16749735,40715550
x1,98:16873598,40715550
k1,98:17220981,40715550:347383
x1,98:18505484,40715550
x1,98:18803672,40715550
x1,98:20062616,40715550
x1,98:20186479,40715550
k1,98:20396703,40715550:210224
x1,98:21279471,40715550
k1,98:21474782,40715550:195311
x1,98:21709400,40715550
x1,98:22007588,40715550
x1,98:23027328,40715550
x1,98:23731838,40715550
x1,98:25278485,40715550
k1,98:25473796,40715550:195311
x1,98:26189448,40715550
x1,98:26634437,40715550
k1,98:26829748,40715550:195311
x1,98:28036264,40715550
k1,98:28231575,40715550:195311
x1,98:28670010,40715550
k1,98:28865321,40715550:195311
x1,98:29479392,40715550
x1,98:29959115,40715550
x1,98:30324805,40715550
x1,98:31517559,40715550
k1,98:31712870,40715550:195311
x1,98:32261406,40715550
k1,98:32261406,40715550:0
)
(1,99:7882014,41501982:24379392,449576,148438
x1,99:8633710,41501982
x1,98:9457496,41501982
k1,98:9645674,41501982:188178
x1,98:10185690,41501982
k1,98:10373867,41501982:188177
x1,98:10987939,41501982
x1,98:11652473,41501982
x1,98:11887091,41501982
x1,98:12800661,41501982
k1,98:12988839,41501982:188178
x1,98:14037415,41501982
k1,98:14225593,41501982:188178
x1,98:15108361,41501982
k1,98:15296539,41501982:188178
x1,98:15531157,41501982
x1,98:15829345,41501982
x1,98:16854327,41501982
x1,98:17957952,41501982
k1,98:18146129,41501982:188177
x1,98:18694665,41501982
k1,98:18882843,41501982:188178
x1,98:20086083,41501982
x1,98:20818119,41501982
x1,98:21340440,41501982
x1,98:22927720,41501982
k1,98:23115898,41501982:188178
x1,98:24365012,41501982
x1,98:24513123,41501982
k1,98:24839106,41501982:325983
x1,98:25413856,41501982
x1,98:26165552,41501982
k1,98:26353730,41501982:188178
x1,98:27236498,41501982
k1,98:27424676,41501982:188178
x1,98:27728762,41501982
x1,98:28208485,41501982
x1,98:28384121,41501982
x1,98:29059797,41501982
x1,98:30163422,41501982
k1,98:30351599,41501982:188177
x1,98:30891615,41501982
k1,98:31079793,41501982:188178
x1,98:31680757,41501982
x1,98:32024821,41501982
x1,98:32261406,41501982
k1,99:32261406,41501982:0
)
(1,99:7882014,42288414:24379392,449576,135003
x1,99:9529588,42288414
k1,98:9687942,42288414:158354
x1,98:11215585,42288414
x1,98:11603558,42288414
x1,98:12777306,42288414
k1,98:12935661,42288414:158355
x1,98:13651313,42288414
x1,98:14096302,42288414
k1,98:14254656,42288414:158354
x1,98:15461172,42288414
k1,98:15619527,42288414:158355
x1,98:16159543,42288414
k1,98:16317897,42288414:158354
x1,98:16633125,42288414
k1,98:16791480,42288414:158355
x1,98:17644758,42288414
x1,98:18425290,42288414
k1,98:18583621,42288414:158331
x1,98:19862881,42288414
k1,98:20021236,42288414:158355
x1,98:20512100,42288414
x1,98:20746718,42288414
x1,98:21635384,42288414
k1,98:21793738,42288414:158354
x1,98:22532328,42288414
x1,98:23437379,42288414
k1,98:23595733,42288414:158354
x1,98:23938486,42288414
x1,98:24339565,42288414
x1,98:24795040,42288414
x1,98:25053907,42288414
k1,98:25212262,42288414:158355
x1,98:25734583,42288414
k1,98:25892937,42288414:158354
x1,98:26208165,42288414
k1,98:26366520,42288414:158355
x1,98:27355457,42288414
x1,98:28813632,42288414
k1,98:28971986,42288414:158354
x1,98:30581549,42288414
k1,98:30739904,42288414:158355
x1,98:31178339,42288414
k1,98:31336693,42288414:158354
x1,98:32024821,42288414
x1,98:32261406,42288414
k1,99:32261406,42288414:0
)
(1,99:7882014,43074846:24379392,449576,148438
x1,99:8197242,43074846
x1,99:8960735,43074846
x1,99:9787144,43074846
k1,98:10071337,43074846:284193
x1,98:10397706,43074846
x1,98:11109425,43074846
x1,98:11682209,43074846
x1,98:13768216,43074846
x1,98:13877005,43074846
k1,98:14060900,43074846:183895
x1,98:15072118,43074846
k1,98:15246366,43074846:174248
x1,98:15480984,43074846
x1,98:15779172,43074846
x1,98:16798912,43074846
x1,98:17503422,43074846
x1,98:19050069,43074846
k1,98:19224316,43074846:174247
x1,98:19939968,43074846
x1,98:20384957,43074846
k1,98:20559205,43074846:174248
x1,98:21765721,43074846
k1,98:21939969,43074846:174248
x1,98:22378404,43074846
k1,98:22552652,43074846:174248
x1,98:23647102,43074846
k1,98:23821349,43074846:174247
x1,98:24435420,43074846
x1,98:24915143,43074846
x1,98:25280833,43074846
x1,98:26473587,43074846
k1,98:26647835,43074846:174248
x1,98:27196371,43074846
k1,98:27370619,43074846:174248
x1,98:28122315,43074846
x1,98:28946101,43074846
k1,98:29120348,43074846:174247
x1,98:29660364,43074846
k1,98:29834612,43074846:174248
x1,98:30448684,43074846
x1,98:31113218,43074846
x1,98:31347836,43074846
x1,98:32261406,43074846
k1,98:32261406,43074846:0
)
(1,99:7882014,43861278:24379392,449576,148438
x1,99:8930590,43861278
k1,98:9073269,43861278:142679
x1,98:9307887,43861278
x1,98:9606075,43861278
x1,98:10631057,43861278
x1,98:11734682,43861278
k1,98:11877361,43861278:142679
x1,98:12425897,43861278
k1,98:12568575,43861278:142678
x1,98:13771815,43861278
x1,98:14503851,43861278
x1,98:15026172,43861278
x1,98:16613452,43861278
k1,98:16756131,43861278:142679
x1,98:18005245,43861278
x1,98:18153356,43861278
k1,98:18342843,43861278:189487
x1,98:18717053,43861278
x1,98:19004755,43861278
k1,98:19147434,43861278:142679
x1,98:20030202,43861278
k1,98:20172880,43861278:142678
x1,98:21313205,43861278
k1,98:21455884,43861278:142679
x1,98:21995900,43861278
k1,98:22138579,43861278:142679
x1,98:22819497,43861278
x1,98:24237693,43861278
x1,98:24381215,43861278
k1,98:24523894,43861278:142679
x1,98:25560673,43861278
x1,98:26174089,43861278
x1,98:27467768,43861278
x1,98:27615879,43861278
k1,98:27760313,43861278:144434
x1,98:28771531,43861278
k1,98:28914209,43861278:142678
x1,98:29595783,43861278
x1,98:30506732,43861278
k1,98:30649411,43861278:142679
x1,98:31087846,43861278
k1,98:31230525,43861278:142679
x1,98:32261406,43861278
k1,98:32261406,43861278:0
)
(1,99:7882014,44647710:24379392,449576,148438
x1,99:8422030,44647710
k1,98:8571710,44647710:149680
x1,98:9454478,44647710
k1,98:9604158,44647710:149680
x1,98:10676324,44647710
k1,98:10826004,44647710:149680
x1,98:11348325,44647710
x1,98:13258041,44647710
k1,98:13407722,44647710:149681
x1,98:13642340,44647710
x1,98:13940528,44647710
x1,98:14889488,44647710
x1,98:15771601,44647710
k1,98:15921281,44647710:149680
x1,98:16469817,44647710
k1,98:16619497,44647710:149680
x1,98:17170653,44647710
x1,98:17480638,44647710
x1,98:17715256,44647710
x1,98:18024585,44647710
x1,98:18831986,44647710
x1,98:19130174,44647710
x1,98:19278285,44647710
k1,98:19431470,44647710:153185
x1,98:20805102,44647710
x1,98:21103290,44647710
k1,98:21252971,44647710:149681
x1,98:22780614,44647710
x1,98:23168587,44647710
x1,98:24182427,44647710
k1,98:24332093,44647710:149666
x1,98:25941001,44647710
k1,98:26090681,44647710:149680
x1,98:26811577,44647710
k1,98:26961257,44647710:149680
x1,98:27403625,44647710
x1,98:28424674,44647710
x1,98:29285161,44647710
k1,98:29434841,44647710:149680
x1,98:30035805,44647710
x1,98:30379869,44647710
x1,98:31157781,44647710
x1,98:32261406,44647710
k1,98:32261406,44647710:0
)
]
(1,99:7882014,46613790:24379392,0,0
h1,99:7882014,46613790:24379392,0,0
)
]
]
!55896
}3
!10
{4
[1,147:4736286,46613790:27590656,41877504,0
[1,147:7947550,46613790:24379392,41222144,0
[1,147:7947550,6178078:24379392,786432,0
(1,147:7947550,6800670:24379392,1409024,0
(1,147:7947550,6800670:24379392,1409024,0
[1,147:7947550,6800670:24379392,1409024,0
(1,147:7947550,5457182:24379392,65536,0
h1,147:7947550,5457182:0,0,0
(1,147:7947550,5457182:24379392,65536,0
r1,147:32326942,5457182:24379392,65536,0
)
g1,147:32326942,5457182
g1,147:32326942,5457182
)
(1,147:7947550,6276382:24379392,372621,0
x1,147:8282504,6276382
k1,147:32326942,6276382:24044438
)
(1,147:7947550,6276382:24379392,395657,68796
(1,147:7947550,6276382:24379392,395657,68796
k1,147:16323621,6276382:8376071
x1,147:17415634,6276382
g1,147:17544510,6276382
x1,147:18574257,6276382
x1,147:19653817,6276382
x1,147:21488556,6276382
g1,147:21617432,6276382
x1,147:23950872,6276382
k1,147:32326942,6276382:8376070
)
)
(1,147:7947550,6800670:24379392,65536,0
h1,147:7947550,6800670:0,0,0
(1,147:7947550,6800670:24379392,65536,0
r1,147:32326942,6800670:24379392,65536,0
)
g1,147:32326942,6800670
g1,147:32326942,6800670
)
]
)
)
]
[1,147:7947550,44647710:24379392,36831232,0
(1,99:7947550,8471838:24379392,449576,148438
x1,99:8385985,8471838
k1,98:8543056,8471838:157071
x1,98:9409441,8471838
x1,98:10292210,8471838
x1,98:10579257,8471838
x1,98:11245758,8471838
k1,98:11402828,8471838:157070
x1,98:11957917,8471838
k1,98:12114988,8471838:157071
x1,98:12803116,8471838
x1,98:13118344,8471838
x1,98:13881837,8471838
x1,98:14187890,8471838
k1,98:14344960,8471838:157070
x1,98:16039061,8471838
k1,98:16196132,8471838:157071
x1,98:17526513,8471838
x1,98:19103307,8471838
k1,98:19260377,8471838:157070
x1,98:19603130,8471838
x1,98:20004209,8471838
x1,98:20459684,8471838
x1,98:20718551,8471838
k1,98:20875622,8471838:157071
x1,98:21614212,8471838
x1,98:22519263,8471838
k1,98:22676333,8471838:157070
x1,98:23224869,8471838
x1,98:24428109,8471838
x1,98:25029073,8471838
x1,98:25852859,8471838
x1,98:26867355,8471838
k1,98:27024426,8471838:157071
x1,98:27259044,8471838
x1,98:29175313,8471838
k1,98:29332383,8471838:157070
x1,98:29880919,8471838
k1,98:30037990,8471838:157071
x1,98:30920758,8471838
k1,98:31077828,8471838:157070
x1,98:32326942,8471838
k1,98:32326942,8471838:0
)
(1,99:7947550,9258270:24379392,449576,3276
x1,99:8655994,9258270
x1,99:10236066,9258270
k1,99:32326942,9258270:22090876
g1,99:32326942,9258270
)
(1,100:7947550,11671502:24379392,617111,16560
(1,100:7947550,11671502:1647370,617111,16560
g1,100:7947550,11671502
x1,100:9159107,11671502
)
x1,100:13952176,11671502
x1,100:15956041,11671502
k1,100:24141492,11671502:8185451
k1,100:32326942,11671502:8185450
)
(1,102:7947550,12912819:24379392,489581,12716
(1,102:7947550,12912819:1264944,473853,0
g1,102:7947550,12912819
x1,102:8877852,12912819
)
x1,102:10067838,12912819
x1,102:11248451,12912819
x1,102:11457936,12912819
x1,102:13652514,12912819
g1,102:13838574,12912819
x1,102:15213952,12912819
k1,102:23770447,12912819:8556495
k1,102:32326942,12912819:8556495
)
(1,106:7947550,14072217:24379392,449576,148438
x1,106:8157920,14072217
x1,104:10323882,14072217
x1,104:12162164,14072217
k1,104:12398181,14072217:236017
x1,104:12868729,14072217
x1,104:14189932,14072217
x1,104:14414720,14072217
x1,104:14741089,14072217
x1,104:16170426,14072217
k1,104:16406443,14072217:236017
x1,104:19094071,14072217
x1,104:20702979,14072217
k1,104:20938995,14072217:236016
x1,104:22171071,14072217
k1,104:22406987,14072217:235916
x1,104:22845422,14072217
k1,104:23081439,14072217:236017
x1,104:23947824,14072217
x1,104:24830593,14072217
x1,104:25117640,14072217
x1,104:25784141,14072217
k1,104:26020158,14072217:236017
x1,104:26575247,14072217
k1,104:26811263,14072217:236016
x1,104:27499391,14072217
x1,104:27814619,14072217
x1,104:28578112,14072217
x1,104:28884165,14072217
k1,104:29120182,14072217:236017
x1,104:30002950,14072217
k1,104:30238967,14072217:236017
x1,104:31098798,14072217
x1,104:31442862,14072217
x1,104:31803310,14072217
x1,104:32108707,14072217
x1,104:32326942,14072217
k1,106:32326942,14072217:0
)
(1,106:7947550,14858649:24379392,449576,135003
x1,106:9192078,14858649
x1,106:9929357,14858649
x1,106:10077468,14858649
k1,104:10454666,14858649:377198
x1,104:11023518,14858649
x1,104:11587782,14858649
x1,104:11885970,14858649
x1,104:12233966,14858649
x1,104:12519702,14858649
x1,104:13061028,14858649
x1,104:13184891,14858649
k1,104:13407539,14858649:222648
x1,104:13985566,14858649
k1,104:14190815,14858649:205249
x1,104:15073583,14858649
k1,104:15278832,14858649:205249
x1,104:15879796,14858649
x1,104:16223860,14858649
x1,104:17871434,14858649
k1,104:18076684,14858649:205250
x1,104:18464657,14858649
x1,104:19478497,14858649
k1,104:19683676,14858649:205179
x1,104:21787379,14858649
k1,104:21992629,14858649:205250
x1,104:23012369,14858649
x1,104:23716879,14858649
x1,104:24855892,14858649
k1,104:25061141,14858649:205249
x1,104:25376369,14858649
k1,104:25581619,14858649:205250
x1,104:25816237,14858649
x1,104:26114425,14858649
x1,104:27809840,14858649
k1,104:28015089,14858649:205249
x1,104:28363085,14858649
x1,104:28597703,14858649
x1,104:29490957,14858649
k1,104:29696207,14858649:205250
x1,104:30371883,14858649
x1,104:31073117,14858649
k1,104:31278366,14858649:205249
x1,104:32326942,14858649
k1,104:32326942,14858649:0
)
(1,106:7947550,15645081:24379392,449576,148438
x1,106:9203218,15645081
k1,104:9358734,15645081:155516
x1,104:10449251,15645081
x1,104:10831980,15645081
x1,104:12115173,15645081
k1,104:12270688,15645081:155515
x1,104:13153456,15645081
k1,104:13308972,15645081:155516
x1,104:13984648,15645081
x1,104:14685882,15645081
k1,104:14841398,15645081:155516
x1,104:15396487,15645081
k1,104:15552002,15645081:155515
x1,104:15867230,15645081
k1,104:16022746,15645081:155516
x1,104:16917310,15645081
k1,104:17072826,15645081:155516
x1,104:17420822,15645081
x1,104:17655440,15645081
x1,104:18548694,15645081
k1,104:18704209,15645081:155515
x1,104:20051627,15645081
x1,104:21315160,15645081
k1,104:21475640,15645081:160480
x1,104:23144839,15645081
k1,104:23300355,15645081:155516
x1,104:23738790,15645081
k1,104:23894305,15645081:155515
x1,104:24988755,15645081
k1,104:25144271,15645081:155516
x1,104:26181050,15645081
x1,104:26998939,15645081
k1,104:27154455,15645081:155516
x1,104:27732482,15645081
k1,104:27887997,15645081:155515
x1,104:28330365,15645081
x1,104:29351414,15645081
x1,104:30211901,15645081
k1,104:30367417,15645081:155516
x1,104:30968381,15645081
x1,104:31312445,15645081
x1,104:32090357,15645081
x1,104:32326942,15645081
k1,106:32326942,15645081:0
)
(1,106:7947550,16431513:24379392,449576,148438
x1,106:9211083,16431513
k1,104:9333950,16431513:122867
x1,104:10216718,16431513
k1,104:10336386,16431513:119668
x1,104:11467535,16431513
x1,104:12050149,16431513
x1,104:12943403,16431513
k1,104:13063072,16431513:119669
x1,104:14806328,16431513
k1,104:14925997,16431513:119669
x1,104:16726268,16431513
k1,104:16845921,16431513:119653
x1,104:18716971,16431513
k1,104:18836639,16431513:119668
x1,104:19507072,16431513
k1,104:19626741,16431513:119669
x1,104:20227705,16431513
x1,104:20762478,16431513
x1,104:22509009,16431513
x1,104:23167645,16431513
k1,104:23287314,16431513:119669
x1,104:23957747,16431513
x1,104:24732381,16431513
x1,104:25030569,16431513
k1,104:25150237,16431513:119668
x1,104:26169977,16431513
x1,104:26874487,16431513
x1,104:27750701,16431513
x1,104:28612498,16431513
k1,104:28732167,16431513:119669
x1,104:29614935,16431513
k1,104:29734603,16431513:119668
x1,104:30122576,16431513
x1,104:31296324,16431513
k1,104:31415993,16431513:119669
x1,104:31765955,16431513
k1,105:31415993,16431513:-21627
x1,105:32326942,16431513
k1,105:32326942,16431513:0
)
(1,106:7947550,17217945:24379392,449576,148438
x1,106:9325771,17217945
k1,105:9486141,17217945:160370
x1,105:10785063,17217945
k1,105:10945457,17217945:160394
x1,105:11493993,17217945
k1,105:11654388,17217945:160395
x1,105:12665606,17217945
k1,105:12826000,17217945:160394
x1,105:13507574,17217945
x1,105:14418523,17217945
x1,105:14542386,17217945
k1,105:14708965,17217945:166579
x1,105:15591733,17217945
k1,105:15752127,17217945:160394
x1,105:16222675,17217945
x1,105:17543878,17217945
x1,105:17768666,17217945
x1,105:18095035,17217945
x1,105:19524372,17217945
k1,105:19684767,17217945:160395
x1,105:21032185,17217945
x1,105:22135810,17217945
k1,105:22296204,17217945:160394
x1,105:22734639,17217945
k1,105:22895034,17217945:160395
x1,105:23592991,17217945
x1,105:23980307,17217945
x1,105:24870285,17217945
k1,105:25030679,17217945:160394
x1,105:25391127,17217945
x1,105:25681450,17217945
k1,105:25841845,17217945:160395
x1,105:26861585,17217945
x1,105:27660468,17217945
x1,105:27970453,17217945
x1,105:28205071,17217945
x1,105:29071455,17217945
k1,105:29231849,17217945:160394
x1,105:30114617,17217945
k1,105:30275012,17217945:160395
x1,105:31294752,17217945
x1,105:31867536,17217945
x1,105:32102154,17217945
x1,105:32326942,17217945
k1,106:32326942,17217945:0
)
(1,106:7947550,18004377:24379392,449576,148438
x1,106:8251636,18004377
x1,106:8562932,18004377
x1,106:9666557,18004377
g1,105:9802216,18004377
x1,105:10342232,18004377
g1,105:10477891,18004377
x1,105:11875117,18004377
x1,105:12029126,18004377
g1,105:12164785,18004377
x1,105:13069181,18004377
x1,105:14308466,18004377
x1,105:15597557,18004377
g1,105:15733216,18004377
x1,105:16781792,18004377
g1,105:16917451,18004377
x1,105:17600336,18004377
x1,105:18144939,18004377
x1,105:18759665,18004377
x1,105:18868454,18004377
g1,105:19004113,18004377
x1,105:19607043,18004377
x1,105:20208007,18004377
x1,105:21702226,18004377
g1,105:21837885,18004377
x1,105:22415912,18004377
g1,105:22551571,18004377
x1,105:22917261,18004377
x1,105:23269844,18004377
x1,105:23417955,18004377
g1,105:23586382,18004377
x1,105:24117222,18004377
h1,105:24117222,18004377:0,0,0
x1,105:24488155,18004377
k1,106:32326942,18004377:7838787
g1,106:32326942,18004377
)
(1,107:7947550,18852478:24379392,0,0
h1,107:7947550,18852478:655360,0,0
k1,107:32326942,18852478:23724032
g1,107:32326942,18852478
)
(1,109:16901555,20124575:15425387,1021553,553594
(1,109:16901555,20124575:6471383,1021553,553594
(1,109:16901555,20124575:982382,917535,454818
(1,109:16901555,20124575:982382,917535,454818
h1,109:16901555,20124575:78643,0,0
[1,109:16980198,20124575:825096,917535,454818
(1,109:16980198,19657600:825096,450560,174845
x1,109:17311809,19657600
[1,109:17311809,19657600:493485,421723,174845
(1,109:17311809,19657600:493485,421723,0
x1,109:17689296,19657600
)
]
)
(1,109:16980198,20574150:825096,450560,5242
k1,109:17085383,20574150:105185
x1,109:17655545,20574150
k1,109:17805294,20574150:105185
)
]
h1,109:17805294,20124575:78643,0,0
)
)
g1,109:17964034,20124575
x1,109:18397882,20124575
g1,109:18477979,20124575
(1,109:18477979,20124575:1085615,1021553,553594
(1,109:18477979,20124575:1085615,1021553,553594
h1,109:18477979,20124575:78643,0,0
[1,109:18556622,20124575:928329,1021553,553594
(1,109:18556622,19553582:928329,450560,278863
x1,109:18888233,19553582
[1,109:18888233,19553582:596718,421723,278863
(1,109:18888233,19553582:596718,421723,104018
x1,109:19251958,19553582
(1,109:19251958,19653616:232993,330720,3984
x1,109:19424789,19653616
)
)
]
)
(1,109:18556622,20574150:928329,450560,104018
k1,109:18566453,20574150:9831
x1,109:19242127,20574150
(1,109:19242127,20674184:232993,330720,3984
x1,109:19414958,20674184
)
k1,109:19484951,20574150:9831
)
]
h1,109:19484951,20124575:78643,0,0
)
)
g1,109:19643691,20124575
x1,109:20077539,20124575
g1,109:20157636,20124575
(1,109:20157636,20124575:1162291,1021553,553594
(1,109:20157636,20124575:1162291,1021553,553594
h1,109:20157636,20124575:78643,0,0
[1,109:20236279,20124575:1005005,1021553,553594
(1,109:20236279,19553582:1005005,450560,278863
x1,109:20567890,19553582
[1,109:20567890,19553582:673394,421723,278863
(1,109:20567890,19553582:673394,421723,104018
x1,109:21008291,19553582
(1,109:21008291,19653616:232993,330720,3984
x1,109:21181122,19653616
)
)
]
)
(1,109:20236279,20574150:1005005,450560,104018
k1,109:20284448,20574150:48169
x1,109:20960122,20574150
(1,109:20960122,20674184:232993,330720,3984
x1,109:21132953,20674184
)
k1,109:21241284,20574150:48169
)
]
h1,109:21241284,20124575:78643,0,0
)
)
g1,109:21400024,20124575
x1,109:21833872,20124575
g1,109:21913969,20124575
[1,109:21913969,20124575:481034,421723,297397
(1,109:21913969,20124575:481034,421723,122552
x1,109:22374687,20124575
)
]
g1,109:22507139,20124575
x1,109:22940987,20124575
g1,109:23053123,20124575
x1,109:23372938,20124575
)
(1,109:31585077,20124575:741865,426639,76349
(1,109:31585077,20124575:741865,426639,76349
x1,109:32115917,20124575
x1,109:32326942,20124575
)
)
)
(1,112:7947550,21833174:24379392,449576,3276
h1,111:7947550,21833174:655360,0,0
x1,111:9976542,21833174
x1,111:10274730,21833174
k1,112:32326942,21833174:22052212
g1,112:32326942,21833174
)
(1,113:7947550,22681276:24379392,0,0
h1,113:7947550,22681276:655360,0,0
k1,113:32326942,22681276:23724032
g1,113:32326942,22681276
)
(1,121:13257759,25034701:19069183,2102881,1763405
(1,121:13257759,25034701:13758975,2102881,1763405
h1,115:13257759,25034701:0,0,0
[1,120:13257759,25034701:13758975,2102881,1763405
(1,116:13257759,23591573:13758975,659753,235932
g1,115:13257759,23591573
(1,116:13257759,23591573:13758975,659753,235932
k1,115:17073230,23591573:3815471
(1,115:17073230,23591573:0,550500,235932
[1,115:17073230,23591573:0,550500,235932
(1,28:17073230,23591573:0,550500,235932
r1,115:17073230,23591573:0,786432,235932
)
]
)
$1,116:17073230,23591573
[1,116:17073230,23591573:493485,421723,174845
(1,116:17073230,23591573:493485,421723,0
x1,116:17450717,23591573
)
]
g1,116:17678851,23591573
x1,116:18112699,23591573
g1,116:18224835,23591573
(1,116:18224835,23591573:4594014,531499,192023
(1,116:18224835,23084190:270715,24116,699406
x1,116:18495550,23084190
)
x1,116:18878935,23591573
k1,115:18495550,23084190:288358
x1,115:19943238,23591573
(1,116:19943238,23689876:275828,306813,0
x1,116:20186298,23689876
)
k1,115:20186298,23689876:288358
x1,115:21283369,23591573
(1,116:21283369,23689876:275828,306813,0
x1,116:21526429,23689876
)
k1,115:21526429,23689876:288358
x1,115:22536993,23591573
k1,116:21526429,23689876:11141
(1,116:22548134,23084190:270715,24116,699406
x1,116:22818849,23084190
)
)
(1,116:22818849,23252330:382414,320510,0
x1,116:23106735,23252330
)
$1,116:23201263,23591573
k1,116:27016734,23591573:3815471
)
g1,116:27016734,23591573
)
(1,118:13257759,24680822:13758975,591173,278863
g1,117:13257759,24680822
(1,118:13257759,24680822:13758975,591173,278863
g1,117:13257759,24680822
(1,115:13257759,24680822:0,550500,235932
[1,115:13257759,24680822:0,550500,235932
(1,28:13257759,24680822:0,550500,235932
r1,117:13257759,24680822:0,786432,235932
)
]
)
$1,118:13257759,24680822
[1,118:13257759,24680822:596718,421723,278863
(1,118:13257759,24680822:596718,421723,104018
x1,118:13621484,24680822
(1,118:13621484,24780856:232993,330720,3984
x1,118:13794315,24780856
)
)
]
g1,118:13966613,24680822
x1,118:14400461,24680822
g1,118:14512597,24680822
x1,118:15493669,24680822
(1,118:15493669,24780856:232993,330720,3984
x1,118:15666500,24780856
)
k1,117:15666500,24780856:288358
x1,117:16790965,24680822
(1,118:16790965,24779125:275828,306813,0
x1,118:17034025,24779125
)
x1,118:17459353,24680822
(1,118:17459353,24780856:232993,330720,3984
x1,118:17632184,24780856
)
g1,118:17772443,24680822
x1,118:18206291,24680822
g1,118:18286388,24680822
x1,118:18642903,24680822
(1,118:18642903,24780856:476053,330720,3984
x1,118:19058794,24780856
)
x1,118:19520691,24680822
k1,118:19086188,24780856:13107
k1,117:19086188,24780856:288358
x1,117:20598101,24680822
(1,118:20598101,24779125:275828,306813,0
x1,118:20841161,24779125
)
x1,118:21266489,24680822
(1,118:21266489,24779125:275828,306813,0
x1,118:21509549,24779125
)
g1,118:21622414,24680822
x1,118:22056262,24680822
g1,118:22136359,24680822
x1,118:22492874,24680822
(1,118:22492874,24780856:476053,330720,3984
x1,118:22908765,24780856
)
x1,118:23370662,24680822
k1,118:22936159,24780856:13107
k1,117:22936159,24780856:288358
x1,117:24064687,24680822
(1,118:24064687,24780856:232993,330720,3984
x1,118:24237518,24780856
)
x1,118:25198143,24680822
g1,118:25289381,24680822
x1,118:25723229,24680822
g1,118:25803326,24680822
x1,118:26205061,24680822
x1,118:26634320,24680822
(1,118:26634320,24410159:382414,320510,0
x1,118:26922206,24410159
)
$1,118:27016734,24680822
g1,118:27016734,24680822
)
g1,118:27016734,24680822
)
(1,120:13257759,26244321:13758975,1022492,553785
g1,119:13257759,26244321
(1,120:13257759,26244321:13758975,1022492,553785
k1,119:14856757,26244321:1598998
(1,115:14856757,26244321:0,550500,235932
[1,115:14856757,26244321:0,550500,235932
(1,28:14856757,26244321:0,550500,235932
r1,119:14856757,26244321:0,786432,235932
)
]
)
$1,120:14856757,26244321
[1,120:14856757,26244321:673394,421723,278863
(1,120:14856757,26244321:673394,421723,104018
x1,120:15297158,26244321
(1,120:15297158,26344355:232993,330720,3984
x1,120:15469989,26344355
)
)
]
g1,120:15642287,26244321
x1,120:16076135,26244321
g1,120:16188271,26244321
(1,120:16188271,26244321:8847052,894238,553785
(1,120:16188271,25375176:367787,24116,1422930
x1,120:16556058,25375176
)
x1,120:16875873,26244321
k1,119:16556058,25375176:288358
g1,120:17244328,26244321
x1,120:17678176,26244321
g1,120:17758273,26244321
x1,120:18091196,26244321
(1,120:18091196,26344355:476053,330720,3984
x1,120:18507087,26344355
)
k1,119:18534481,26344355:288358
g1,120:18935704,26244321
x1,120:19369552,26244321
g1,120:19449649,26244321
x1,120:19782572,26244321
(1,120:19782572,26344355:476053,330720,3984
x1,120:20198463,26344355
)
k1,119:20225857,26344355:288358
g1,120:20627080,26244321
x1,120:21060928,26244321
g1,120:21141025,26244321
x1,120:21489021,26244321
(1,120:21515235,26244321:1065953,894238,553594
(1,120:21515235,26244321:1065953,894238,553594
h1,120:21515235,26244321:78643,0,0
[1,120:21593878,26244321:908667,894238,553594
(1,120:21593878,25800643:908667,450560,5242
k1,120:21652375,25800643:58497
x1,120:22362784,25800643
k1,120:22502545,25800643:58497
)
(1,120:21593878,26693896:908667,450560,104018
x1,120:22269552,26693896
(1,120:22269552,26793930:232993,330720,3984
x1,120:22442383,26793930
)
)
]
h1,120:22502545,26244321:78643,0,0
)
)
g1,120:22661285,26244321
x1,120:23095133,26244321
g1,120:23175230,26244321
x1,120:23508153,26244321
(1,120:23508153,26344355:483524,330720,112564
x1,120:23680984,26344355
x1,120:23919561,26344355
)
x1,120:24384237,26244321
(1,120:24384237,26344355:283299,330720,112564
x1,120:24595420,26344355
)
(1,120:24667536,25375176:367787,24116,1422930
x1,120:25035323,25375176
)
)
(1,120:25035323,25542339:382414,320510,0
x1,120:25323209,25542339
)
$1,120:25417737,26244321
k1,120:27016734,26244321:1598997
)
g1,120:27016734,26244321
)
]
)
(1,121:31585077,25034701:741865,426639,76349
(1,121:31585077,25034701:741865,426639,76349
x1,121:32115917,25034701
x1,121:32326942,25034701
)
)
)
(1,124:7947550,27953111:24379392,449576,148438
h1,123:7947550,27953111:655360,0,0
x1,123:9652795,27953111
g1,123:9788454,27953111
x1,123:11034291,27953111
g1,123:11169950,27953111
x1,123:12397438,27953111
x1,123:13012164,27953111
g1,123:13147823,27953111
x1,123:13586258,27953111
g1,123:13721917,27953111
x1,123:14925811,27953111
x1,123:16420030,27953111
g1,123:16555689,27953111
x1,123:17133716,27953111
g1,123:17269375,27953111
x1,123:17635065,27953111
x1,123:17987648,27953111
x1,123:18135759,27953111
g1,123:18304186,27953111
x1,123:18835026,27953111
h1,123:18835026,27953111:0,0,0
x1,123:19205959,27953111
k1,124:32326942,27953111:13120983
g1,124:32326942,27953111
)
(1,125:7947550,28801212:24379392,0,0
h1,125:7947550,28801212:655360,0,0
k1,125:32326942,28801212:23724032
g1,125:32326942,28801212
)
(1,127:16806619,29899135:15520323,847379,597687
(1,127:16806619,29899135:6661254,847379,597687
x1,127:17112672,29899135
g1,127:17235949,29899135
x1,127:17669797,29899135
g1,127:17781933,29899135
(1,127:17781933,29899135:2235715,741866,597687
(1,127:17781933,29899135:2235715,741866,597687
h1,127:17781933,29899135:78643,0,0
[1,127:17860576,29899135:2078429,741866,597687
(1,127:17860576,29455457:2078429,298188,148111
k1,127:18692370,29455457:831794
x1,127:19094105,29455457
k1,127:19939005,29455457:831793
)
(1,127:17860576,30348710:2078429,426639,148111
x1,127:18814123,30348710
g1,127:18894220,30348710
x1,127:19328068,30348710
g1,127:19408165,30348710
x1,127:19939005,30348710
)
]
h1,127:19939005,29899135:78643,0,0
)
)
g1,127:20097745,29899135
x1,127:20531593,29899135
g1,127:20611690,29899135
(1,127:20611690,29899135:477101,847379,449576
(1,127:20611690,29899135:477101,847379,449576
h1,127:20611690,29899135:78643,0,0
[1,127:20690333,29899135:319815,847379,449576
(1,127:20690333,29455457:319815,403701,0
x1,127:21010148,29455457
)
(1,127:20690333,30348710:319815,403701,0
x1,127:21010148,30348710
)
]
h1,127:21010148,29899135:78643,0,0
)
)
x1,127:21692376,29899135
[1,127:21692376,30075161:288935,753502,0
(1,127:21705483,29628472:275828,306813,0
x1,127:21948543,29628472
)
(1,127:21692376,30075161:275828,306813,0
x1,127:21935436,30075161
)
]
g1,127:22061408,29899135
x1,127:22495256,29899135
g1,127:22575353,29899135
x1,127:22967913,29899135
[1,127:22967913,30075161:288935,753502,0
(1,127:22981020,29628472:275828,306813,0
x1,127:23224080,29628472
)
(1,127:22967913,30075161:275828,306813,0
x1,127:23210973,30075161
)
]
x1,127:23467873,29899135
)
(1,127:31585077,29899135:741865,426639,76349
(1,127:31585077,29899135:741865,426639,76349
x1,127:32115917,29899135
x1,127:32326942,29899135
)
)
)
(1,129:7947550,32416595:24379392,489581,144565
(1,129:7947550,32416595:1264944,473853,0
g1,129:7947550,32416595
x1,129:8877852,32416595
)
x1,129:12038876,32416595
g1,129:12224936,32416595
x1,129:12894219,32416595
x1,129:13922237,32416595
g1,129:14108297,32416595
x1,129:17269319,32416595
g1,129:17455379,32416595
x1,129:18087182,32416595
g1,129:18273242,32416595
x1,129:19277166,32416595
g1,129:19463226,32416595
x1,129:23814902,32416595
x1,129:24366390,32416595
g1,129:24552450,32416595
x1,129:25407794,32416595
x1,129:26588407,32416595
x1,129:26797892,32416595
x1,129:28992470,32416595
g1,129:29178530,32416595
x1,129:31967431,32416595
k1,129:32147187,32416595:179756
k1,129:32326942,32416595:179755
)
(1,137:7947550,33575993:24379392,449576,148438
x1,137:8389918,33575993
x1,131:9410967,33575993
x1,131:10271454,33575993
k1,131:10400310,33575993:128856
x1,131:11001274,33575993
x1,131:11345338,33575993
x1,131:12123250,33575993
x1,131:13226875,33575993
k1,131:13355731,33575993:128856
x1,131:13794166,33575993
k1,131:13923022,33575993:128856
x1,131:14789407,33575993
x1,131:15672176,33575993
x1,131:15959223,33575993
x1,131:16625724,33575993
k1,131:16754580,33575993:128856
x1,131:17309669,33575993
k1,131:17438525,33575993:128856
x1,131:18458265,33575993
x1,131:19162775,33575993
x1,131:20038989,33575993
k1,131:20167845,33575993:128856
x1,131:20483073,33575993
k1,131:20611930,33575993:128857
x1,131:20999903,33575993
x1,131:22173651,33575993
k1,131:22302507,33575993:128856
x1,131:23911415,33575993
k1,131:24040271,33575993:128856
x1,131:24761167,33575993
k1,131:24890023,33575993:128856
x1,131:25360571,33575993
x1,131:26681774,33575993
x1,131:26906562,33575993
x1,131:27232931,33575993
x1,131:28662268,33575993
k1,131:28791124,33575993:128856
x1,131:30023200,33575993
x1,131:30147063,33575993
k1,131:30275919,33575993:128856
x1,131:30625881,33575993
x1,131:31186868,33575993
k1,131:31315724,33575993:128856
x1,131:32326942,33575993
k1,131:32326942,33575993:0
)
(1,137:7947550,34362425:24379392,449576,148438
x1,137:8548514,34362425
x1,137:8892578,34362425
x1,137:9670490,34362425
x1,137:10934023,34362425
k1,131:11133692,34362425:199669
x1,131:11448920,34362425
k1,131:11635788,34362425:186868
x1,131:12311464,34362425
x1,131:13012698,34362425
k1,131:13199565,34362425:186867
x1,131:13503651,34362425
x1,131:14109203,34362425
x1,131:14898910,34362425
k1,131:15085778,34362425:186868
x1,131:15524213,34362425
k1,131:15711080,34362425:186867
x1,131:16419524,34362425
x1,131:18160814,34362425
k1,131:18347681,34362425:186867
x1,131:19142631,34362425
k1,131:19329499,34362425:186868
x1,131:19930463,34362425
x1,131:21185476,34362425
k1,131:21372343,34362425:186867
x1,131:21720339,34362425
x1,131:21954957,34362425
x1,131:23193584,34362425
x1,131:23541580,34362425
x1,131:24398135,34362425
k1,131:24585002,34362425:186867
x1,131:25255435,34362425
x1,131:26458675,34362425
x1,131:27173017,34362425
x1,131:27611452,34362425
x1,131:28715077,34362425
k1,131:28901945,34362425:186868
x1,131:30774961,34362425
k1,131:30961828,34362425:186867
x1,131:31404196,34362425
x1,131:32090357,34362425
x1,131:32326942,34362425
k1,137:32326942,34362425:0
)
(1,137:7947550,35148857:24379392,449576,148438
x1,137:8257535,35148857
x1,137:8492153,35148857
x1,137:9443733,35148857
x1,137:9552522,35148857
k1,131:9734006,35148857:181484
x1,131:10752434,35148857
k1,131:10924753,35148857:172319
x1,131:12363921,35148857
x1,131:13335164,35148857
k1,131:13507483,35148857:172319
x1,131:14057329,35148857
x1,131:14355517,35148857
k1,131:14527835,35148857:172318
x1,131:15826757,35148857
k1,131:15999076,35148857:172319
x1,131:16773710,35148857
k1,131:16946029,35148857:172319
x1,131:17828797,35148857
k1,131:18001116,35148857:172319
x1,131:19020856,35148857
x1,131:19725366,35148857
x1,131:20394487,35148857
x1,131:21498112,35148857
k1,131:21670431,35148857:172319
x1,131:22210447,35148857
k1,131:22382766,35148857:172319
x1,131:22770739,35148857
x1,131:24207286,35148857
k1,131:24449033,35148857:241747
x1,131:24985117,35148857
x1,131:25219735,35148857
x1,131:26023860,35148857
k1,131:26196178,35148857:172318
x1,131:26797142,35148857
x1,131:27141206,35148857
x1,131:27919118,35148857
x1,131:29022743,35148857
k1,131:29195062,35148857:172319
x1,131:29915958,35148857
k1,131:30088277,35148857:172319
x1,131:30971045,35148857
k1,131:31143364,35148857:172319
x1,131:31804621,35148857
x1,131:32326942,35148857
k1,137:32326942,35148857:0
)
(1,137:7947550,35935289:24379392,562141,148438
x1,137:8492153,35935289
x1,137:8869640,35935289
x1,137:9731437,35935289
k1,131:9904269,35935289:172832
x1,131:11251687,35935289
x1,131:12355312,35935289
$1,131:12420848,35935289
(1,131:12420848,35697394:1447296,324246,64500
x1,131:12581227,35697394
(1,131:12581227,35697394:486120,306813,0
x1,131:13067347,35697394
)
x1,131:13188877,35697394
(1,131:13188877,35697394:486120,306813,2489
x1,131:13674997,35697394
)
x1,131:13835376,35697394
)
$1,131:13868144,35935289
k1,131:14040976,35935289:172832
x1,131:15089552,35935289
k1,131:15262384,35935289:172832
x1,131:16145152,35935289
k1,131:16317984,35935289:172832
x1,131:16918948,35935289
x1,131:17263012,35935289
x1,131:18040924,35935289
x1,131:19144549,35935289
k1,131:19317381,35935289:172832
x1,131:19857397,35935289
k1,131:20030229,35935289:172832
x1,131:20912997,35935289
k1,131:21085828,35935289:172831
x1,131:21761504,35935289
x1,131:22462738,35935289
k1,131:22635570,35935289:172832
x1,131:22939656,35935289
x1,131:23545208,35935289
x1,131:24334915,35935289
k1,131:24507747,35935289:172832
x1,131:25228643,35935289
k1,131:25401475,35935289:172832
x1,131:26284243,35935289
k1,131:26457075,35935289:172832
x1,131:27255958,35935289
x1,131:27789420,35935289
x1,131:28760006,35935289
x1,131:29426507,35935289
k1,131:29599339,35935289:172832
x1,131:30260596,35935289
x1,131:30546332,35935289
x1,131:31087658,35935289
x1,131:31465145,35935289
x1,131:32326942,35935289
k1,131:32326942,35935289:0
)
(1,137:7947550,36721721:24379392,562141,148438
x1,137:9294968,36721721
x1,137:10558501,36721721
$1,131:10624037,36721721
(1,131:10624037,36483826:839646,324246,58025
x1,131:10784416,36483826
(1,131:10784416,36483826:486120,306813,0
x1,131:11270536,36483826
)
x1,131:11430915,36483826
)
$1,131:11463683,36721721
k1,131:11592648,36721721:128965
x1,131:12642533,36721721
k1,133:12771499,36721721:128966
x1,133:13791239,36721721
x1,133:14546868,36721721
x1,133:14912558,36721721
x1,133:15889043,36721721
k1,133:16018008,36721721:128965
x1,133:16405981,36721721
x1,133:17419821,36721721
k1,133:17548780,36721721:128959
x1,133:19368713,36721721
k1,133:19497679,36721721:128966
x1,133:20218575,36721721
k1,133:20347540,36721721:128965
x1,133:20883624,36721721
x1,133:21118242,36721721
x1,133:21922367,36721721
k1,133:22051333,36721721:128966
x1,133:22652297,36721721
x1,133:22996361,36721721
x1,133:23774273,36721721
x1,133:24877898,36721721
k1,133:25006863,36721721:128965
x1,133:27365500,36721721
k1,133:27494466,36721721:128966
x1,133:27932901,36721721
k1,133:28061866,36721721:128965
x1,133:29506277,36721721
x1,133:29816262,36721721
x1,133:30894983,36721721
x1,133:31070619,36721721
x1,133:32326942,36721721
k1,133:32326942,36721721:0
)
(1,137:7947550,37508153:24379392,449576,135003
x1,137:8942385,37508153
x1,137:10021761,37508153
k1,133:10160137,37508153:138376
x1,133:11421048,37508153
k1,133:11559423,37508153:138375
x1,133:12442191,37508153
k1,133:12580567,37508153:138376
x1,133:13379450,37508153
x1,133:13912912,37508153
x1,133:14883498,37508153
x1,133:15549999,37508153
k1,133:15688374,37508153:138375
x1,133:16076347,37508153
x1,133:17090187,37508153
k1,133:17228560,37508153:138373
x1,133:17666995,37508153
x1,133:17815106,37508153
k1,133:17991683,37508153:176577
x1,133:18472717,37508153
x1,133:18802363,37508153
x1,133:19247352,37508153
x1,133:19857491,37508153
x1,133:20398817,37508153
x1,133:20522680,37508153
k1,133:20661735,37508153:139055
x1,133:22144812,37508153
k1,133:22283187,37508153:138375
x1,133:23165955,37508153
k1,133:23304331,37508153:138376
x1,133:24103214,37508153
x1,133:24636676,37508153
x1,133:25607262,37508153
x1,133:26273763,37508153
k1,133:26412139,37508153:138376
x1,133:26800112,37508153
x1,133:27813952,37508153
k1,133:27952324,37508153:138372
x1,133:28390759,37508153
k1,133:28529135,37508153:138376
x1,133:29732375,37508153
x1,133:30464411,37508153
x1,133:30986732,37508153
x1,133:32090357,37508153
x1,133:32326942,37508153
k1,137:32326942,37508153:0
)
(1,137:7947550,38294585:24379392,449576,148438
x1,137:8905029,38294585
k1,133:9039692,38294585:134663
x1,133:9349677,38294585
x1,133:9909354,38294585
x1,133:11433720,38294585
k1,133:11568582,38294585:134862
x1,133:11951311,38294585
k1,133:12085973,38294585:134662
x1,133:12524408,38294585
k1,133:12659071,38294585:134663
x1,133:13653250,38294585
x1,133:14610729,38294585
k1,133:14745391,38294585:134662
x1,133:15765131,38294585
x1,133:16469641,38294585
x1,133:18016288,38294585
k1,133:18150951,38294585:134663
x1,133:18511399,38294585
x1,133:18801722,38294585
k1,133:18936385,38294585:134663
x1,133:20375553,38294585
x1,133:21346796,38294585
k1,133:21481458,38294585:134662
x1,133:22774481,38294585
k1,133:22909144,38294585:134663
x1,133:23487171,38294585
k1,133:23621834,38294585:134663
x1,133:24064202,38294585
x1,133:25500094,38294585
x1,133:25970642,38294585
x1,133:27653605,38294585
k1,133:27788267,38294585:134662
x1,133:29000025,38294585
k1,133:29134688,38294585:134663
x1,133:29816262,38294585
x1,133:30417226,38294585
x1,133:30761290,38294585
x1,133:31043093,38294585
x1,133:31218729,38294585
x1,133:32090357,38294585
x1,133:32326942,38294585
k1,137:32326942,38294585:0
)
(1,137:7947550,39081017:24379392,449576,148438
x1,137:9051175,39081017
k1,133:9218360,39081017:167185
x1,133:10108338,39081017
x1,133:11216550,39081017
k1,133:11383735,39081017:167185
x1,133:12890406,39081017
x1,133:13222672,39081017
x1,133:13466465,39081017
k1,133:13633618,39081017:167153
x1,133:14682194,39081017
k1,133:14849379,39081017:167185
x1,133:15648262,39081017
x1,133:16181724,39081017
x1,133:16996990,39081017
k1,133:17164175,39081017:167185
x1,133:18030560,39081017
x1,133:18572542,39081017
x1,133:18807160,39081017
x1,133:18987383,39081017
x1,133:19769882,39081017
k1,133:19937068,39081017:167186
x1,133:20485604,39081017
x1,133:21002682,39081017
x1,133:21951642,39081017
x1,133:22435297,39081017
x1,133:23538922,39081017
k1,133:23706107,39081017:167185
x1,133:25853719,39081017
k1,133:26020904,39081017:167185
x1,133:28057759,39081017
k1,133:28224912,39081017:167153
x1,133:29894111,39081017
k1,133:30061296,39081017:167185
x1,133:30609832,39081017
k1,133:30777017,39081017:167185
x1,133:32326942,39081017
k1,133:32326942,39081017:0
)
(1,137:7947550,39867449:24379392,562141,148438
x1,137:9397205,39867449
k1,133:9578810,39867449:181605
x1,133:9813428,39867449
x1,133:10111616,39867449
x1,133:11244075,39867449
x1,133:11542263,39867449
k1,133:11723868,39867449:181605
x1,133:12106597,39867449
x1,133:12416582,39867449
x1,133:12651200,39867449
x1,133:12960529,39867449
x1,133:13647344,39867449
x1,133:13954052,39867449
k1,133:14135658,39867449:181606
x1,133:14736622,39867449
x1,133:15080686,39867449
x1,133:15858598,39867449
x1,133:17225022,39867449
x1,133:17373133,39867449
$1,133:17438669,39867449
(1,133:17438669,39629554:839646,324246,58025
x1,133:17599048,39629554
(1,133:17599048,39629554:486120,306813,2489
x1,133:18085168,39629554
)
x1,133:18245547,39629554
)
$1,133:18278315,39867449
k1,133:18459920,39867449:181605
x1,133:18670290,39867449
k1,135:18459920,39867449:-11142
x1,135:19032048,39867449
k1,135:19213653,39867449:181605
x1,135:20224871,39867449
k1,135:20406476,39867449:181605
x1,135:21088050,39867449
x1,135:21998999,39867449
x1,135:22122862,39867449
k1,135:22315954,39867449:193092
x1,135:22631182,39867449
k1,135:22812787,39867449:181605
x1,135:23832527,39867449
x1,135:24588156,39867449
x1,135:24953846,39867449
x1,135:25930331,39867449
k1,135:26111937,39867449:181606
x1,135:26499910,39867449
x1,135:27513750,39867449
k1,135:27695308,39867449:181558
x1,135:28133743,39867449
k1,135:28315349,39867449:181606
x1,135:29614271,39867449
k1,135:29795876,39867449:181605
x1,135:30570510,39867449
k1,135:30752115,39867449:181605
x1,135:31288199,39867449
x1,135:31522817,39867449
x1,135:32326942,39867449
k1,135:32326942,39867449:0
)
(1,137:7947550,40653881:24379392,449576,148438
x1,137:8548514,40653881
x1,137:8892578,40653881
x1,137:9670490,40653881
x1,137:10774115,40653881
k1,135:10963874,40653881:189759
x1,135:11684770,40653881
k1,135:11874528,40653881:189758
x1,135:12757296,40653881
k1,135:12947055,40653881:189759
x1,135:13608312,40653881
x1,135:13894048,40653881
x1,135:14435374,40653881
x1,135:14812861,40653881
x1,135:15674658,40653881
k1,135:15864417,40653881:189759
x1,135:17211835,40653881
x1,135:18475368,40653881
k1,135:18806094,40653881:330726
x1,135:20097152,40653881
k1,136:20286856,40653881:189704
x1,136:20889786,40653881
x1,136:21331497,40653881
x1,136:22409562,40653881
k1,136:22599321,40653881:189759
x1,136:23482089,40653881
k1,136:23671848,40653881:189759
x1,136:24651610,40653881
x1,136:24886228,40653881
x1,136:25494401,40653881
x1,136:26011479,40653881
x1,136:26246097,40653881
x1,136:26689119,40653881
x1,136:27633491,40653881
k1,136:27823250,40653881:189759
x1,136:28363266,40653881
k1,136:28553024,40653881:189758
x1,136:29271297,40653881
x1,136:30125229,40653881
k1,136:30314988,40653881:189759
x1,136:30851072,40653881
x1,136:32090357,40653881
x1,136:32326942,40653881
k1,137:32326942,40653881:0
)
(1,137:7947550,41440313:24379392,449576,148438
x1,137:9106881,41440313
k1,136:9276353,41440313:169472
x1,136:10107348,41440313
x1,136:11443625,41440313
x1,136:11597634,41440313
k1,136:11775559,41440313:177925
x1,136:12535120,41440313
k1,136:12704592,41440313:169472
x1,136:13715810,41440313
k1,136:13885282,41440313:169472
x1,136:14566856,41440313
x1,136:15477805,41440313
k1,136:15647276,41440313:169471
x1,136:16695852,41440313
k1,136:16865324,41440313:169472
x1,136:18415249,41440313
k1,136:18584721,41440313:169472
x1,136:19505500,41440313
x1,136:20312902,41440313
x1,136:20466911,41440313
k1,136:20644836,41440313:177925
x1,136:22023057,41440313
k1,136:22192495,41440313:169438
x1,136:22427113,41440313
x1,136:22725301,41440313
x1,136:24203134,41440313
k1,136:24372606,41440313:169472
x1,136:24733054,41440313
x1,136:25023377,41440313
k1,136:25192849,41440313:169472
x1,136:25874423,41440313
x1,136:26409196,41440313
x1,136:27576390,41440313
k1,136:27745861,41440313:169471
x1,136:28628629,41440313
k1,136:28798101,41440313:169472
x1,136:30061633,41440313
k1,136:30231105,41440313:169472
x1,136:31765955,41440313
x1,136:32326942,41440313
k1,136:32326942,41440313:0
)
(1,137:7947550,42226745:24379392,449576,135003
x1,137:8548514,42226745
x1,137:9101637,42226745
x1,137:9576117,42226745
x1,137:10420875,42226745
x1,137:10568986,42226745
g1,136:10737413,42226745
x1,136:12021916,42226745
x1,136:12320104,42226745
x1,136:13579048,42226745
x1,136:13702911,42226745
g1,136:13838570,42226745
x1,136:14721338,42226745
g1,136:14856997,42226745
x1,136:15459927,42226745
x1,136:15901638,42226745
x1,136:17387337,42226745
g1,136:17522996,42226745
x1,136:18814054,42226745
g1,136:18949713,42226745
x1,136:20787341,42226745
g1,136:20923000,42226745
x1,136:21909972,42226745
g1,136:22045631,42226745
x1,136:22716064,42226745
g1,136:22851723,42226745
x1,136:24150645,42226745
g1,136:24286304,42226745
x1,136:24864331,42226745
g1,136:24999990,42226745
x1,136:25675666,42226745
x1,136:26376900,42226745
g1,136:26512559,42226745
x1,136:26816645,42226745
x1,136:27422197,42226745
x1,136:28474703,42226745
g1,136:28610362,42226745
x1,136:29384996,42226745
g1,136:29520655,42226745
x1,136:29908628,42226745
x1,136:31082376,42226745
k1,137:32326942,42226745:1244566
g1,137:32326942,42226745
)
(1,139:7947550,43074846:24379392,449576,135003
h1,138:7947550,43074846:655360,0,0
x1,138:9652795,43074846
k1,138:9811771,43074846:158976
x1,138:10412735,43074846
x1,138:10947508,43074846
x1,138:12694039,43074846
x1,138:13352675,43074846
k1,138:13511651,43074846:158976
x1,138:13746269,43074846
x1,138:15311265,43074846
k1,138:15470240,43074846:158975
x1,138:15896878,43074846
x1,138:16797342,43074846
k1,138:16956318,43074846:158976
x1,138:18334539,43074846
k1,138:18493491,43074846:158952
x1,138:19043337,43074846
x1,138:19341525,43074846
k1,138:19500501,43074846:158976
x1,138:20824327,43074846
x1,138:21365653,43074846
x1,138:22247766,43074846
k1,138:22406742,43074846:158976
x1,138:23510367,43074846
k1,138:23669342,43074846:158975
x1,138:23984570,43074846
k1,138:24143546,43074846:158976
x1,138:26644397,43074846
k1,138:26803373,43074846:158976
x1,138:28116712,43074846
x1,138:28589880,43074846
k1,138:28748856,43074846:158976
x1,138:29960614,43074846
k1,138:30119590,43074846:158976
x1,138:30434818,43074846
k1,138:30593793,43074846:158975
x1,138:31321897,43074846
x1,138:31627950,43074846
k1,138:31786926,43074846:158976
x1,138:32326942,43074846
k1,138:32326942,43074846:0
)
(1,139:7947550,43861278:24379392,449576,148438
x1,139:8433826,43861278
k1,138:8531545,43861278:42014
x1,138:8965393,43861278
k1,138:9007408,43861278:42015
x1,138:9361302,43861278
$1,138:9366545,43861278
x1,138:9526453,43861278
k1,138:9649648,43861278:123195
x1,138:10227675,43861278
k1,138:10347754,43861278:120079
x1,138:11324239,43861278
x1,138:12142128,43861278
k1,138:12262207,43861278:120079
x1,138:12810743,43861278
k1,138:12930823,43861278:120080
x1,138:13296513,43861278
x1,138:13649096,43861278
x1,138:13797207,43861278
k1,138:13960441,43861278:163234
x1,138:14491281,43861278
h1,138:14491281,43861278:0,0,0
x1,138:14862214,43861278
k1,138:15025448,43861278:163234
$1,138:15025448,43861278
x1,138:15511724,43861278
$1,138:15567429,43861278
k1,138:15687508,43861278:120079
x1,138:16803584,43861278
x1,138:19075060,43861278
k1,138:19195139,43861278:120079
x1,138:19750228,43861278
k1,138:19870307,43861278:120079
x1,138:20753075,43861278
k1,138:20873155,43861278:120080
x1,138:23073196,43861278
k1,138:23193275,43861278:120079
x1,138:23733291,43861278
k1,138:23853370,43861278:120079
x1,138:25071682,43861278
x1,138:25942654,43861278
k1,138:26062733,43861278:120079
x1,138:26602749,43861278
k1,138:26722828,43861278:120079
x1,138:27149466,43861278
x1,138:29022483,43861278
k1,138:29142563,43861278:120080
x1,138:31155171,43861278
k1,138:31278366,43861278:123195
x1,138:32326942,43861278
k1,138:32326942,43861278:0
)
(1,139:7947550,44647710:24379392,449576,135003
x1,139:8301444,44647710
$1,138:8306687,44647710
g1,138:8442346,44647710
x1,138:9558422,44647710
x1,138:11829898,44647710
g1,138:11965557,44647710
x1,138:12520646,44647710
g1,138:12656305,44647710
x1,138:13539073,44647710
g1,138:13674732,44647710
x1,138:15874773,44647710
g1,138:16010432,44647710
x1,138:16550448,44647710
g1,138:16686107,44647710
x1,138:17935221,44647710
g1,138:18070880,44647710
x1,138:19479902,44647710
g1,138:19615561,44647710
x1,138:21074391,44647710
k1,139:32326942,44647710:11252551
g1,139:32326942,44647710
)
]
(1,147:7947550,46613790:24379392,0,0
h1,147:7947550,46613790:24379392,0,0
)
]
]
!40422
}4
!10
{5
[1,197:4736286,46613790:27525120,41877504,0
[1,197:7882014,46613790:24379392,41222144,0
[1,197:7882014,6178078:24379392,786432,0
(1,197:7882014,6800670:24379392,1409024,0
(1,197:7882014,6800670:24379392,1409024,0
[1,197:7882014,6800670:24379392,1409024,0
(1,197:7882014,5457182:24379392,65536,0
h1,197:7882014,5457182:0,0,0
(1,197:7882014,5457182:24379392,65536,0
r1,197:32261406,5457182:24379392,65536,0
)
g1,197:32261406,5457182
g1,197:32261406,5457182
)
(1,197:7882014,6276382:24379392,395657,55410
x1,197:8856344,6276382
g1,197:8985220,6276382
x1,197:9609667,6276382
g1,197:9738543,6276382
x1,197:10534811,6276382
k1,197:12002457,6276382:1467646
x1,197:13352210,6276382
g1,197:13481086,6276382
x1,197:15703699,6276382
g1,197:15832575,6276382
x1,197:16862322,6276382
x1,197:17831683,6276382
x1,197:19289131,6276382
g1,197:19418007,6276382
x1,197:20814454,6276382
x1,197:21831729,6276382
g1,197:21960605,6276382
x1,197:22794852,6276382
g1,197:22923728,6276382
x1,197:23624753,6276382
x1,197:27995267,6276382
g1,197:28124143,6276382
x1,197:28523834,6276382
x1,197:29549223,6276382
g1,197:29678099,6276382
x1,197:29861134,6276382
x1,197:30121370,6276382
x1,197:30381606,6276382
k1,197:31926452,6276382:1467645
x1,197:32261406,6276382
)
(1,197:7882014,6800670:24379392,65536,0
h1,197:7882014,6800670:0,0,0
(1,197:7882014,6800670:24379392,65536,0
r1,197:32261406,6800670:24379392,65536,0
)
g1,197:32261406,6800670
g1,197:32261406,6800670
)
]
)
)
]
[1,197:7882014,44647710:24379392,36831232,0
(1,140:7882014,8471838:24379392,0,0
h1,140:7882014,8471838:655360,0,0
k1,140:32261406,8471838:23724032
g1,140:32261406,8471838
)
(1,147:15937886,10393459:16323520,1836288,1496811
(1,147:15937886,10393459:8267649,1836288,1496811
[1,147:15937886,10393459:667811,421723,349690
[1,147:15937886,10393459:667811,421723,174845
(1,147:15937886,10393459:667811,421723,0
x1,147:16501495,10393459
)
]
]
g1,147:16717833,10393459
x1,147:17151681,10393459
g1,147:17263817,10393459
(1,147:17263817,10393459:6941718,1836288,1496811
[1,147:17263817,8619912:401954,24116,3231735
(1,147:17263817,8619912:401954,24116,1061168
x1,147:17665771,8619912
)
(1,147:17263817,9681080:401954,0,361761
x1,147:17665771,9681080
)
(1,147:17263817,10042841:401954,0,361761
x1,147:17665771,10042841
)
(1,147:17263817,10404602:401954,0,361761
x1,147:17665771,10404602
)
(1,147:17263817,10790479:401954,24116,1061168
x1,147:17665771,10790479
)
]
[1,146:17665771,10393459:6137810,1836288,1496811
(1,143:17665771,9170128:6137810,612957,235932
g1,142:17665771,9170128
(1,142:17665771,9170128:1657614,612957,235932
r1,142:17665771,9170128:0,786432,235932
g1,142:17993451,9170128
g1,142:17993451,9170128
g1,142:17993452,9170128
$1,142:17993452,9170128
x1,142:18386012,9170128
[1,142:18386012,9386131:609693,828960,0
(1,142:18399119,8881417:596586,324246,58025
x1,142:18962937,8881417
)
(1,142:18386012,9386131:275828,306813,0
x1,142:18629072,9386131
)
]
$1,142:18995705,9170128
g1,142:18995705,9170128
g1,142:19323385,9170128
)
g1,142:19323385,9170128
(1,142:19323385,9170128:1657614,612957,235932
g1,142:19651065,9170128
g1,142:19651065,9170128
g1,142:19651066,9170128
$1,142:19651066,9170128
x1,142:20043626,9170128
[1,142:20043626,9386131:609693,828960,0
(1,142:20056733,8881417:596586,324246,58025
x1,142:20620551,8881417
)
(1,142:20043626,9386131:275828,306813,0
x1,142:20286686,9386131
)
]
$1,142:20653319,9170128
g1,142:20653319,9170128
g1,142:20980999,9170128
)
g1,142:20980999,9170128
(1,142:20980999,9170128:1135085,612957,235932
g1,142:21308679,9170128
g1,142:21308679,9170128
g1,142:21308680,9170128
$1,142:21308680,9170128
x1,142:21788404,9170128
$1,142:21788404,9170128
g1,142:21788404,9170128
g1,142:22116084,9170128
)
g1,142:22116084,9170128
(1,143:22116084,9170128:1687497,612957,235932
g1,142:22443764,9170128
g1,142:22443764,9170128
g1,142:22443765,9170128
$1,143:22443765,9170128
x1,143:22836325,9170128
[1,143:22836325,9386131:639576,828960,0
(1,143:22849432,8881417:626469,324246,58025
x1,143:23278770,8881417
x1,143:23443133,8881417
)
(1,143:22836325,9386131:275828,306813,0
x1,143:23079385,9386131
)
]
$1,143:23475901,9170128
g1,143:23475901,9170128
g1,143:23803581,9170128
)
g1,143:23803581,9170128
)
(1,144:17665771,10019017:6137810,612957,235932
g1,143:17665771,10019017
(1,143:17665771,10019017:1657614,612957,235932
r1,143:17665771,10019017:0,786432,235932
g1,143:17993451,10019017
g1,143:17993451,10019017
g1,143:17993452,10019017
$1,143:17993452,10019017
x1,143:18386012,10019017
[1,143:18386012,10235020:609693,828960,0
(1,143:18399119,9730306:596586,324246,58025
x1,143:18962937,9730306
)
(1,143:18386012,10235020:275828,306813,0
x1,143:18629072,10235020
)
]
$1,143:18995705,10019017
g1,143:18995705,10019017
g1,143:19323385,10019017
)
g1,143:19323385,10019017
(1,143:19323385,10019017:1657614,612957,235932
g1,143:19651065,10019017
g1,143:19651065,10019017
g1,143:19651066,10019017
$1,143:19651066,10019017
x1,143:20043626,10019017
[1,143:20043626,10235020:609693,828960,0
(1,143:20056733,9730306:596586,324246,58025
x1,143:20620551,9730306
)
(1,143:20043626,10235020:275828,306813,0
x1,143:20286686,10235020
)
]
$1,143:20653319,10019017
g1,143:20653319,10019017
g1,143:20980999,10019017
)
g1,143:20980999,10019017
(1,143:20980999,10019017:1135085,612957,235932
g1,143:21308679,10019017
g1,143:21308679,10019017
g1,143:21308680,10019017
$1,143:21308680,10019017
x1,143:21788404,10019017
$1,143:21788404,10019017
g1,143:21788404,10019017
g1,143:22116084,10019017
)
g1,143:22116084,10019017
(1,144:22116084,10019017:1687497,612957,235932
g1,143:22443764,10019017
g1,143:22443764,10019017
g1,143:22443765,10019017
$1,144:22443765,10019017
x1,144:22836325,10019017
[1,144:22836325,10235020:639576,828960,0
(1,144:22849432,9730306:626469,324246,58025
x1,144:23278770,9730306
x1,144:23443133,9730306
)
(1,144:22836325,10235020:275828,306813,0
x1,144:23079385,10235020
)
]
$1,144:23475901,10019017
g1,144:23475901,10019017
g1,144:23803581,10019017
)
g1,144:23803581,10019017
)
(1,145:17665771,10805449:6137810,550500,235932
g1,144:17665771,10805449
(1,144:17665771,10805449:1657614,550500,235932
r1,144:17665771,10805449:0,786432,235932
g1,144:17993451,10805449
k1,144:18414624,10805449:421173
g1,144:18414625,10805449
$1,144:18414625,10805449
x1,144:18574533,10805449
$1,144:18574533,10805449
k1,144:18995705,10805449:421172
g1,144:19323385,10805449
)
g1,144:19323385,10805449
(1,144:19323385,10805449:1657614,550500,235932
g1,144:19651065,10805449
k1,144:20072238,10805449:421173
g1,144:20072239,10805449
$1,144:20072239,10805449
x1,144:20232147,10805449
$1,144:20232147,10805449
k1,144:20653319,10805449:421172
g1,144:20980999,10805449
)
g1,144:20980999,10805449
(1,144:20980999,10805449:1135085,550500,235932
g1,144:21308679,10805449
k1,144:21468587,10805449:159908
g1,144:21468588,10805449
$1,144:21468588,10805449
x1,144:21628496,10805449
$1,144:21628496,10805449
k1,144:21788404,10805449:159908
g1,144:22116084,10805449
)
g1,144:22116084,10805449
(1,145:22116084,10805449:1687497,550500,235932
g1,144:22443764,10805449
k1,144:22879878,10805449:436114
g1,144:22879879,10805449
$1,145:22879879,10805449
x1,145:23039787,10805449
$1,145:23039787,10805449
k1,145:23475901,10805449:436114
g1,145:23803581,10805449
)
g1,145:23803581,10805449
)
(1,146:17665771,11654338:6137810,612957,235932
g1,145:17665771,11654338
(1,145:17665771,11654338:1657614,612957,235932
r1,145:17665771,11654338:0,786432,235932
g1,145:17993451,11654338
g1,145:17993451,11654338
g1,145:17993452,11654338
$1,145:17993452,11654338
x1,145:18386012,11654338
[1,145:18386012,11884038:609693,842657,0
(1,145:18399119,11365627:596586,324246,58025
x1,145:18962937,11365627
)
(1,145:18386012,11884038:444674,320510,0
x1,145:18755582,11884038
)
]
$1,145:18995705,11654338
g1,145:18995705,11654338
g1,145:19323385,11654338
)
g1,145:19323385,11654338
(1,145:19323385,11654338:1657614,612957,235932
g1,145:19651065,11654338
g1,145:19651065,11654338
g1,145:19651066,11654338
$1,145:19651066,11654338
x1,145:20043626,11654338
[1,145:20043626,11884038:609693,842657,0
(1,145:20056733,11365627:596586,324246,58025
x1,145:20620551,11365627
)
(1,145:20043626,11884038:444674,320510,0
x1,145:20413196,11884038
)
]
$1,145:20653319,11654338
g1,145:20653319,11654338
g1,145:20980999,11654338
)
g1,145:20980999,11654338
(1,145:20980999,11654338:1135085,612957,235932
g1,145:21308679,11654338
g1,145:21308679,11654338
g1,145:21308680,11654338
$1,145:21308680,11654338
x1,145:21788404,11654338
$1,145:21788404,11654338
g1,145:21788404,11654338
g1,145:22116084,11654338
)
g1,145:22116084,11654338
(1,146:22116084,11654338:1687497,612957,235932
g1,145:22443764,11654338
g1,145:22443764,11654338
g1,145:22443765,11654338
$1,146:22443765,11654338
x1,146:22836325,11654338
[1,146:22836325,11884038:639576,842657,0
(1,146:22849432,11365627:626469,324246,58025
x1,146:23278770,11365627
x1,146:23443133,11365627
)
(1,146:22836325,11884038:444674,320510,0
x1,146:23205895,11884038
)
]
$1,146:23475901,11654338
g1,146:23475901,11654338
g1,146:23803581,11654338
)
g1,146:23803581,11654338
)
]
[1,147:23803581,8619912:401954,24116,3231735
(1,147:23803581,8619912:401954,24116,1061168
x1,147:24205535,8619912
)
(1,147:23803581,9681080:401954,0,361761
x1,147:24205535,9681080
)
(1,147:23803581,10042841:401954,0,361761
x1,147:24205535,10042841
)
(1,147:23803581,10404602:401954,0,361761
x1,147:24205535,10404602
)
(1,147:23803581,10790479:401954,24116,1061168
x1,147:24205535,10790479
)
]
)
)
(1,147:31519541,10393459:741865,426639,76349
(1,147:31519541,10393459:741865,426639,76349
x1,147:32050381,10393459
x1,147:32261406,10393459
)
)
)
(1,151:7882014,12824994:24379392,449576,148438
h1,150:7882014,12824994:655360,0,0
x1,150:9587259,12824994
k1,150:9759130,12824994:171871
x1,150:11028560,12824994
k1,150:11200432,12824994:171872
x1,150:11504518,12824994
x1,150:13314619,12824994
k1,150:13486490,12824994:171871
x1,150:14535066,12824994
k1,150:14706937,12824994:171871
x1,150:15307901,12824994
x1,150:16731995,12824994
x1,150:17030183,12824994
k1,150:17202055,12824994:171872
x1,150:17751901,12824994
x1,150:18050089,12824994
k1,150:18221960,12824994:171871
x1,150:19425854,12824994
x1,150:20920073,12824994
k1,150:21091944,12824994:171871
x1,150:21452392,12824994
x1,150:21742715,12824994
k1,150:21914587,12824994:171872
x1,150:23207609,12824994
k1,150:23379480,12824994:171871
x1,150:23998794,12824994
x1,150:24540120,12824994
x1,150:25472695,12824994
k1,150:25644566,12824994:171871
x1,150:26693142,12824994
k1,150:26865014,12824994:171872
x1,150:27775963,12824994
x1,150:30367252,12824994
k1,150:30539123,12824994:171871
x1,150:30843209,12824994
x1,150:32261406,12824994
k1,150:32261406,12824994:0
)
(1,151:7882014,13611426:24379392,449576,148438
x1,151:8116632,13611426
x1,150:9543347,13611426
k1,150:9693491,13611426:150144
x1,150:10954402,13611426
k1,150:11104547,13611426:150145
x1,150:12397569,13611426
k1,150:12547713,13611426:150144
x1,150:15112789,13611426
k1,150:15262934,13611426:150145
x1,150:15567020,13611426
x1,150:16985217,13611426
x1,150:17133328,13611426
k1,150:17345211,13611426:211883
x1,150:17787579,13611426
x1,150:19018343,13611426
x1,150:19969923,13611426
x1,150:20078712,13611426
k1,150:20232477,13611426:153765
x1,150:21115245,13611426
k1,150:21265390,13611426:150145
x1,150:21981042,13611426
x1,150:22426031,13611426
k1,150:22576175,13611426:150144
x1,150:23782691,13611426
k1,150:23932835,13611426:150144
x1,150:24167453,13611426
x1,150:25732449,13611426
k1,150:25882594,13611426:150145
x1,150:27958117,13611426
k1,150:28108261,13611426:150144
x1,150:28423489,13611426
k1,150:28573634,13611426:150145
x1,150:29291907,13611426
x1,150:29911221,13611426
k1,150:30061365,13611426:150144
x1,150:32261406,13611426
k1,150:32261406,13611426:0
)
(1,151:7882014,14397858:24379392,449576,148438
x1,151:8422030,14397858
k1,150:8607385,14397858:185355
x1,150:10197943,14397858
k1,150:10408145,14397858:210202
x1,150:11525531,14397858
x1,150:12598353,14397858
x1,150:12896541,14397858
x1,150:13044652,14397858
k1,150:13242430,14397858:197778
x1,150:14430595,14397858
k1,150:14615950,14397858:185355
x1,150:15165796,14397858
x1,150:15463984,14397858
k1,150:15649338,14397858:185354
x1,150:15883956,14397858
x1,150:16783108,14397858
x1,150:18904506,14397858
k1,150:19089861,14397858:185355
x1,150:19667888,14397858
k1,150:19853242,14397858:185354
x1,150:20168470,14397858
k1,150:20353825,14397858:185355
x1,150:21667164,14397858
x1,150:22300240,14397858
k1,150:22617754,14397858:317514
x1,150:23908812,14397858
k1,150:24094116,14397858:185304
x1,150:25931744,14397858
k1,150:26117098,14397858:185354
x1,150:26666944,14397858
x1,150:26965132,14397858
k1,150:27150487,14397858:185355
x1,150:28195128,14397858
x1,150:29680827,14397858
k1,150:29866181,14397858:185354
x1,150:30292819,14397858
x1,150:31193283,14397858
k1,150:31378638,14397858:185355
x1,150:32261406,14397858
k1,150:32261406,14397858:0
)
(1,151:7882014,15184290:24379392,449576,148438
x1,151:9195353,15184290
x1,150:9668521,15184290
g1,150:9804180,15184290
x1,150:10599130,15184290
g1,150:10734789,15184290
x1,150:12943348,15184290
g1,150:13079007,15184290
x1,150:13383093,15184290
x1,150:14538491,15184290
g1,150:14674150,15184290
x1,150:18804225,15184290
g1,150:18939884,15184290
x1,150:20700179,15184290
g1,150:20835838,15184290
x1,150:21413865,15184290
g1,150:21549524,15184290
x1,150:22526009,15184290
x1,150:23343898,15184290
g1,150:23479557,15184290
x1,150:24028093,15184290
g1,150:24163752,15184290
x1,150:24529442,15184290
x1,150:25144824,15184290
x1,150:25292935,15184290
g1,150:25461362,15184290
x1,150:25992202,15184290
h1,150:25992202,15184290:0,0,0
x1,150:26228787,15184290
x1,150:26548602,15184290
h1,150:26548602,15184290:0,0,0
x1,150:26919535,15184290
k1,151:32261406,15184290:5341871
g1,151:32261406,15184290
)
(1,152:7882014,15977320:24379392,0,0
h1,152:7882014,15977320:655360,0,0
k1,152:32261406,15977320:23724032
g1,152:32261406,15977320
)
(1,154:18659172,16783549:13602234,591173,358865
(1,154:18659172,16783549:2825077,591173,358865
[1,154:18659172,16783549:448921,421723,358865
[1,154:18659172,16783549:448921,421723,184020
(1,154:18659172,16783549:448921,421723,9175
x1,154:19070738,16783549
)
]
]
g1,154:19220229,16783549
x1,154:19654077,16783549
g1,154:19766213,16783549
[1,154:19766213,16783549:1050225,591173,349690
[1,154:19766213,16783549:1050225,591173,174845
(1,154:19766213,16783549:1050225,591173,0
x1,154:20329822,16783549
(1,154:20434024,16512886:382414,320510,0
x1,154:20721910,16512886
)
)
]
]
[1,154:20816438,16783549:667811,421723,349690
[1,154:20816438,16783549:667811,421723,174845
(1,154:20816438,16783549:667811,421723,0
x1,154:21380047,16783549
)
]
]
)
(1,154:31519541,16783549:741865,426639,76349
(1,154:31519541,16783549:741865,426639,76349
x1,154:32050381,16783549
x1,154:32261406,16783549
)
)
)
(1,157:18842186,18091320:13419220,450560,472242
(1,157:18842186,18091320:2459048,450560,472242
[1,157:18842186,18091320:448921,421723,358865
[1,157:18842186,18091320:448921,421723,184020
(1,157:18842186,18091320:448921,421723,9175
x1,157:19253752,18091320
)
]
]
[1,157:19291107,18091320:481034,421723,472242
[1,157:19291107,18091320:481034,421723,297397
(1,157:19291107,18091320:481034,421723,122552
x1,157:19751825,18091320
)
]
]
g1,157:19884277,18091320
x1,157:20318125,18091320
g1,157:20430261,18091320
[1,157:20430261,18091320:389939,450560,354932
[1,157:20430261,18091320:389939,450560,180087
(1,157:20430261,18091320:389939,450560,5242
x1,157:20820200,18091320
)
]
]
[1,157:20820200,18091320:481034,421723,472242
[1,157:20820200,18091320:481034,421723,297397
(1,157:20820200,18091320:481034,421723,122552
x1,157:21280918,18091320
)
]
]
)
(1,157:31519541,18091320:741865,426639,76349
(1,157:31519541,18091320:741865,426639,76349
x1,157:32050381,18091320
x1,157:32261406,18091320
)
)
)
(1,160:18197253,19909286:14064153,847379,721998
(1,160:18197253,19909286:3748915,847379,721998
[1,160:18197253,19909286:462684,421723,349690
[1,160:18197253,19909286:462684,421723,174845
(1,160:18197253,19909286:462684,421723,0
x1,160:18659937,19909286
)
]
]
g1,160:18772073,19909286
x1,160:19205921,19909286
g1,160:19318057,19909286
(1,160:19318057,19909286:1479266,847379,721998
(1,160:19318057,19909286:1479266,847379,721998
h1,160:19318057,19909286:78643,0,0
[1,160:19396700,19909286:1321980,847379,721998
(1,160:19396700,19465608:1321980,403701,0
k1,160:19897783,19465608:501083
x1,160:20217598,19465608
k1,160:20718680,19465608:501082
)
(1,160:19396700,20476707:1321980,614768,154576
(1,159:19492817,20476707:1225863,614768,154576
$1,159:19492817,20476707
(1,159:19492817,20476707:1225863,614768,154576
(1,159:19492817,19931877:602931,34969,699406
x1,159:20095748,19931877
)
[1,159:20095748,20476707:622932,614768,104018
(1,159:20095748,20476707:622932,450560,104018
x1,159:20485687,20476707
(1,159:20485687,20576741:232993,330720,3984
x1,159:20658518,20576741
)
)
]
)
$1,159:20718680,20476707
)
)
]
h1,160:20718680,19909286:78643,0,0
)
)
[1,160:20797323,19909286:667811,421723,349690
[1,160:20797323,19909286:667811,421723,174845
(1,160:20797323,19909286:667811,421723,0
x1,160:21360932,19909286
)
]
]
[1,160:21465134,19909286:481034,421723,472242
[1,160:21465134,19909286:481034,421723,297397
(1,160:21465134,19909286:481034,421723,122552
x1,160:21925852,19909286
)
]
]
)
(1,160:31519541,19909286:741865,426639,76349
(1,160:31519541,19909286:741865,426639,76349
x1,160:32050381,19909286
x1,160:32261406,19909286
)
)
)
(1,169:7882014,21566008:24379392,449576,135003
h1,168:7882014,21566008:655360,0,0
x1,168:8925347,21566008
x1,168:9939187,21566008
k1,168:10097438,21566008:158251
x1,168:10637454,21566008
k1,168:10795728,21566008:158274
x1,168:11678496,21566008
k1,168:11836770,21566008:158274
x1,168:14189510,21566008
x1,168:16027792,21566008
k1,168:16186066,21566008:158274
x1,168:16656614,21566008
x1,168:17977817,21566008
x1,168:18202605,21566008
x1,168:18528974,21566008
x1,168:19958311,21566008
k1,168:20116585,21566008:158274
x1,168:22567628,21566008
k1,168:22725902,21566008:158274
x1,168:23164337,21566008
k1,168:23322610,21566008:158273
x1,168:24526504,21566008
x1,168:26020723,21566008
k1,168:26178997,21566008:158274
x1,168:26757024,21566008
k1,168:26915298,21566008:158274
x1,168:27603426,21566008
k1,168:27761700,21566008:158274
x1,168:29227739,21566008
k1,168:29386013,21566008:158274
x1,168:29986977,21566008
x1,168:31563116,21566008
k1,168:31721390,21566008:158274
x1,168:32261406,21566008
k1,168:32261406,21566008:0
)
(1,169:7882014,22352440:24379392,449576,135003
x1,169:9173072,22352440
g1,168:9308731,22352440
x1,168:11146359,22352440
g1,168:11282018,22352440
x1,168:12330594,22352440
g1,168:12466253,22352440
x1,168:13349021,22352440
g1,168:13484680,22352440
x1,168:16757544,22352440
g1,168:16893203,22352440
x1,168:19504154,22352440
g1,168:19639813,22352440
x1,168:20217840,22352440
g1,168:20353499,22352440
x1,168:21329984,22352440
x1,168:22147873,22352440
g1,168:22283532,22352440
x1,168:22832068,22352440
g1,168:22967727,22352440
x1,168:23333417,22352440
x1,168:23686000,22352440
x1,168:23834111,22352440
g1,168:24002538,22352440
x1,168:24533378,22352440
h1,168:24533378,22352440:0,0,0
x1,168:24904311,22352440
k1,169:32261406,22352440:7357095
g1,169:32261406,22352440
)
(1,170:7882014,23145471:24379392,0,0
h1,170:7882014,23145471:655360,0,0
k1,170:32261406,23145471:23724032
g1,170:32261406,23145471
)
(1,172:14883870,24153581:17377536,922777,553785
(1,172:14883870,24153581:10375681,922777,553785
(1,172:14883870,24153581:9397746,922777,553785
(1,172:14883870,23284436:269509,24116,1422930
x1,172:15153379,23284436
)
x1,172:15616063,24153581
(1,172:15616063,24265320:317167,342425,3984
x1,172:15880540,24265320
)
x1,172:16093138,24153581
g1,172:16157216,24153581
(1,172:16157216,24153581:894564,922777,454818
(1,172:16157216,24153581:894564,922777,454818
h1,172:16157216,24153581:78643,0,0
[1,172:16235859,24153581:737278,922777,454818
(1,172:16235859,23681364:737278,450560,180087
x1,172:16567470,23681364
[1,172:16567470,23681364:405667,298188,180087
(1,172:16567470,23681364:405667,298188,5242
x1,172:16960030,23681364
)
]
)
(1,172:16235859,24603156:737278,450560,5242
k1,172:16297135,24603156:61276
x1,172:16867297,24603156
k1,172:16973137,24603156:61276
)
]
h1,172:16973137,24153581:78643,0,0
)
)
g1,172:17131877,24153581
x1,172:17565725,24153581
g1,172:17645822,24153581
x1,172:17856847,24153581
[1,172:17856847,24153581:405667,298188,180087
(1,172:17856847,24153581:405667,298188,5242
x1,172:18249407,24153581
)
]
x1,172:19176085,24153581
[1,172:19176085,24153581:405667,298188,180087
(1,172:19176085,24153581:405667,298188,5242
x1,172:19568645,24153581
)
]
g1,172:19661849,24153581
x1,172:20095697,24153581
g1,172:20175794,24153581
x1,172:21120167,24153581
g1,172:21213371,24153581
x1,172:21647219,24153581
g1,172:21727316,24153581
(1,172:21727316,24153581:900464,847379,454818
(1,172:21727316,24153581:900464,847379,454818
h1,172:21727316,24153581:78643,0,0
[1,172:21805959,24153581:743178,847379,454818
(1,172:21805959,23709903:743178,403701,0
k1,172:22017641,23709903:211682
x1,172:22337456,23709903
k1,172:22549137,23709903:211681
)
(1,172:21805959,24603156:743178,421723,5242
x1,172:22211627,24603156
x1,172:22537996,24603156
)
]
h1,172:22549137,24153581:78643,0,0
)
)
g1,172:22707877,24153581
x1,172:23250515,24153581
(1,172:23250515,23882918:275828,306813,0
x1,172:23493575,23882918
)
g1,172:23606440,24153581
[1,172:23606440,24153581:405667,298188,180087
(1,172:23606440,24153581:405667,298188,5242
x1,172:23999000,24153581
)
]
(1,172:24012107,23284436:269509,24116,1422930
x1,172:24281616,23284436
)
)
g1,172:24393752,24153581
x1,172:24827600,24153581
g1,172:24939736,24153581
x1,172:25259551,24153581
)
(1,172:31519541,24153581:741865,426639,76349
(1,172:31519541,24153581:741865,426639,76349
x1,172:32050381,24153581
x1,172:32261406,24153581
)
)
)
(1,175:7882014,25697216:24379392,504702,190129
h1,174:7882014,25697216:655360,0,0
x1,174:9911006,25697216
x1,174:10209194,25697216
k1,174:10376779,25697216:167585
$1,174:10376779,25697216
x1,174:10958737,25697216
x1,174:11133063,25697216
k1,174:11197141,25697216:64078
x1,174:11553656,25697216
x1,174:11777788,25697216
k1,174:11921392,25697216:143604
x1,174:12355240,25697216
k1,174:12498844,25697216:143604
(1,174:12498844,25192514:284583,0,669928
x1,174:12783427,25192514
)
(1,174:12783427,25887345:401840,320510,0
x1,174:13152499,25887345
)
k1,174:13249345,25697216:64078
x1,174:13620278,25697216
k1,174:13727380,25697216:92684
x1,174:13906948,25697216
k1,174:13999632,25697216:92684
x1,174:14356147,25697216
x1,174:14742809,25697216
x1,174:15269717,25697216
$1,174:15269717,25697216
x1,174:15429625,25697216
k1,174:15693830,25697216:264205
x1,174:16743715,25697216
k1,174:16911301,25697216:167586
x1,174:17215387,25697216
x1,174:19025488,25697216
k1,174:19193073,25697216:167585
x1,174:19715394,25697216
k1,174:19882979,25697216:167585
x1,174:20198207,25697216
k1,174:20365792,25697216:167585
x1,174:21209239,25697216
x1,174:22284683,25697216
k1,174:22452268,25697216:167585
x1,174:23681722,25697216
x1,174:25411215,25697216
k1,174:25578800,25697216:167585
x1,174:26627376,25697216
k1,174:26794962,25697216:167586
x1,174:28044076,25697216
k1,174:28211661,25697216:167585
x1,174:28650096,25697216
k1,174:28817681,25697216:167585
x1,174:30021575,25697216
x1,174:31515794,25697216
k1,174:31683379,25697216:167585
x1,174:32261406,25697216
k1,174:32261406,25697216:0
)
(1,175:7882014,26483648:24379392,426639,135003
x1,175:8247704,26483648
x1,174:8600287,26483648
x1,174:8748398,26483648
g1,174:8916825,26483648
x1,174:9447665,26483648
h1,174:9447665,26483648:0,0,0
x1,174:9818598,26483648
k1,175:32261406,26483648:22442808
g1,175:32261406,26483648
)
(1,176:7882014,27276679:24379392,0,0
h1,176:7882014,27276679:655360,0,0
k1,176:32261406,27276679:23724032
g1,176:32261406,27276679
)
(1,178:16179288,28431978:16082118,1069967,700468
(1,178:16179288,28431978:7784845,1069967,700468
x1,178:16571848,28431978
x1,178:17140043,28431978
x1,178:17322233,28431978
g1,178:17386311,28431978
x1,178:17624862,28431978
x1,178:17880451,28431978
g1,178:17992587,28431978
x1,178:18426435,28431978
g1,178:18538571,28431978
[1,178:18538571,28431978:405667,413531,5242
(1,178:18669970,28422148:0,403701,0
x1,178:18911142,28422148
)
(1,178:18538571,28431978:405667,298188,5242
x1,178:18931131,28431978
)
]
x1,178:19499326,28431978
x1,178:19732633,28431978
g1,178:19812730,28431978
x1,178:20246578,28431978
g1,178:20326675,28431978
[1,178:20326675,28431978:780217,1069967,700468
(1,178:20326675,27742814:780217,320510,77713
x1,178:20696245,27742814
(1,178:20696245,27820527:410647,253034,0
x1,178:21048566,27820527
)
)
(1,178:20326675,28431978:780217,544459,204983
k1,178:20383967,28431978:57292
(1,178:20383967,27887519:665634,0,749442
x1,178:21049601,27887519
)
k1,178:21106892,28431978:57291
)
(1,178:20326675,29068169:780217,330720,3984
k1,178:20330279,29068169:3604
x1,178:20503110,29068169
x1,178:21103288,29068169
k1,178:21106892,29068169:3604
)
]
g1,178:21170970,28431978
x1,178:21541903,28431978
(1,178:21541903,28532012:232993,330720,3984
x1,178:21714734,28532012
)
x1,178:22224472,28431978
x1,178:22942745,28431978
(1,178:22942745,28532012:232993,330720,3984
x1,178:23115576,28532012
)
x1,178:23730826,28431978
x1,178:23964133,28431978
)
(1,178:31519541,28431978:741865,426639,76349
(1,178:31519541,28431978:741865,426639,76349
x1,178:32050381,28431978
x1,178:32261406,28431978
)
)
)
(1,180:7882014,30887008:24379392,489581,12716
(1,180:7882014,30887008:1264944,473853,12716
g1,180:7882014,30887008
x1,180:8812316,30887008
)
x1,180:12642621,30887008
g1,180:12828681,30887008
x1,180:13460484,30887008
g1,180:13646544,30887008
x1,180:14129767,30887008
x1,180:15194596,30887008
k1,180:23728001,30887008:8533405
k1,180:32261406,30887008:8533405
)
(1,182:7882014,31991335:24379392,449576,148438
x1,182:8294235,31991335
x1,181:11105726,31991335
k1,181:11237934,31991335:132208
x1,181:11625907,31991335
x1,181:12639747,31991335
k1,181:12771952,31991335:132205
x1,181:13948977,31991335
k1,181:14081186,31991335:132209
x1,181:14751619,31991335
k1,181:14883827,31991335:132208
x1,181:15622417,31991335
x1,181:16488802,31991335
x1,181:16723420,31991335
x1,181:16903643,31991335
x1,181:18159966,31991335
k1,181:18292175,31991335:132209
x1,181:19030765,31991335
x1,181:19815885,31991335
x1,181:20654745,31991335
k1,181:20786953,31991335:132208
x1,181:21335489,31991335
k1,181:21467697,31991335:132208
x1,181:21782925,31991335
k1,181:21915134,31991335:132209
x1,181:22880478,31991335
k1,181:23012686,31991335:132208
x1,181:24462341,31991335
x1,181:24610452,31991335
k1,181:24777729,31991335:167277
x1,181:25956064,31991335
k1,181:26088272,31991335:132208
x1,181:26636808,31991335
x1,181:27421928,31991335
x1,181:28126439,31991335
x1,181:28814565,31991335
k1,181:28946774,31991335:132209
x1,181:29385209,31991335
k1,181:29517417,31991335:132208
x1,181:30408705,31991335
x1,181:32261406,31991335
k1,181:32261406,31991335:0
)
(1,182:7882014,32777767:24379392,562141,148438
x1,182:8437103,32777767
k1,181:8559805,32777767:122702
x1,181:9230238,32777767
k1,181:9352939,32777767:122701
x1,181:11265933,32777767
k1,181:11388635,32777767:122702
x1,181:11749083,32777767
x1,181:12039406,32777767
k1,181:12162108,32777767:122702
x1,181:13044876,32777767
k1,181:13167577,32777767:122701
x1,181:14106051,32777767
k1,181:14228753,32777767:122702
x1,181:14768769,32777767
k1,181:14891470,32777767:122701
x1,181:15774238,32777767
k1,181:15896940,32777767:122702
x1,181:17661820,32777767
k1,181:17784522,32777767:122702
x1,181:18132518,32777767
x1,181:18367136,32777767
x1,181:19260390,32777767
k1,181:19383091,32777767:122701
x1,181:20674149,32777767
k1,181:20796838,32777767:122689
x1,181:22634466,32777767
k1,181:22757168,32777767:122702
x1,181:23339782,32777767
k1,181:23462483,32777767:122701
x1,181:24498606,32777767
k1,181:24621308,32777767:122702
x1,181:25176397,32777767
k1,181:25299099,32777767:122702
x1,181:25944627,32777767
k1,181:26067328,32777767:122701
x1,181:26615864,32777767
x1,181:27291539,32777767
x1,181:27526157,32777767
x1,181:28404338,32777767
k1,181:28527040,32777767:122702
x1,181:29075576,32777767
x1,181:29860696,32777767
x1,181:30565207,32777767
x1,181:31253333,32777767
x1,181:31356224,32777767
$1,181:31421760,32777767
(1,181:31421760,32539872:839646,324246,58025
x1,181:31582139,32539872
(1,181:31582139,32539872:486120,306813,2489
x1,181:32068259,32539872
)
x1,181:32228638,32539872
)
$1,181:32261406,32777767
k1,182:32261406,32777767:0
)
(1,182:7882014,33564199:24379392,449576,148438
x1,182:8264744,33564199
x1,182:8617983,33564199
x1,182:9154067,33564199
x1,182:10257692,33564199
x1,182:11215171,33564199
x1,182:11323960,33564199
k1,181:11535657,33564199:211697
x1,181:12418425,33564199
k1,181:12614915,33564199:196490
x1,181:13150999,33564199
x1,181:13845025,33564199
x1,181:14079643,33564199
x1,181:15359560,33564199
k1,181:15556050,33564199:196490
x1,181:16226483,33564199
x1,181:16896915,33564199
x1,181:17885853,33564199
k1,181:18082343,33564199:196490
x1,181:18965111,33564199
k1,181:19161601,33564199:196490
x1,181:19875943,33564199
x1,181:20258672,33564199
x1,181:21298727,33564199
k1,181:21495216,33564199:196489
x1,181:22178101,33564199
x1,181:22722704,33564199
x1,181:23337430,33564199
k1,181:23533920,33564199:196490
x1,181:24582496,33564199
k1,181:24778986,33564199:196490
x1,181:25661754,33564199
k1,181:25858244,33564199:196490
x1,181:26218692,33564199
x1,181:28243097,33564199
k1,181:28439586,33564199:196489
x1,181:30277214,33564199
k1,181:30473704,33564199:196490
x1,181:31509827,33564199
k1,181:31706317,33564199:196490
x1,181:32261406,33564199
k1,181:32261406,33564199:0
)
(1,182:7882014,34350631:24379392,449576,148438
x1,182:9173072,34350631
k1,181:9352935,34350631:179863
x1,181:10529960,34350631
k1,181:10709868,34350631:179908
x1,181:11804318,34350631
k1,181:11984225,34350631:179907
x1,181:12218843,34350631
x1,181:12517031,34350631
x1,181:13521040,34350631
k1,181:13700948,34350631:179908
x1,181:14249484,34350631
k1,181:14429391,34350631:179907
x1,181:14977927,34350631
x1,181:15763047,34350631
x1,181:16467558,34350631
x1,181:17155684,34350631
x1,181:17258575,34350631
k1,181:17559748,34350631:301173
x1,181:18844251,34350631
x1,181:19142439,34350631
x1,181:19917073,34350631
x1,181:20215261,34350631
x1,181:20363372,34350631
k1,181:20554342,34350631:190970
x1,181:21437110,34350631
k1,181:21617018,34350631:179908
x1,181:22399517,34350631
x1,181:22575153,34350631
x1,181:23170219,34350631
x1,181:23479548,34350631
x1,181:24583173,34350631
k1,181:24763080,34350631:179907
x1,181:25303096,34350631
k1,181:25483004,34350631:179908
x1,181:26556482,34350631
x1,181:27270824,34350631
x1,181:27505442,34350631
x1,181:27983198,34350631
k1,181:28163105,34350631:179907
x1,181:28809945,34350631
x1,181:29119930,34350631
x1,181:29679607,34350631
x1,181:31306864,34350631
k1,181:31486772,34350631:179908
x1,181:32261406,34350631
k1,181:32261406,34350631:0
)
(1,182:7882014,35137063:24379392,562141,148438
x1,182:8230010,35137063
x1,182:8464628,35137063
x1,182:8988915,35137063
x1,182:9911661,35137063
x1,182:10228199,35137063
k1,181:10445948,35137063:217749
x1,181:10982032,35137063
x1,181:11676058,35137063
x1,181:11910676,35137063
x1,181:12581764,35137063
x1,181:13448148,35137063
k1,181:13665897,35137063:217749
x1,181:15013315,35137063
x1,181:16379739,35137063
k1,181:16597488,35137063:217749
x1,181:17198452,35137063
x1,181:17542516,35137063
x1,181:19190090,35137063
k1,181:19407839,35137063:217749
x1,181:19768287,35137063
x1,181:20058610,35137063
k1,181:20276359,35137063:217749
x1,181:20718727,35137063
x1,181:21195173,35137063
x1,181:22263407,35137063
k1,181:22481157,35137063:217750
x1,181:22919592,35137063
k1,181:23137341,35137063:217749
x1,181:24157081,35137063
x1,181:24955964,35137063
x1,181:25500567,35137063
x1,181:26159203,35137063
k1,181:26376952,35137063:217749
x1,181:26925488,35137063
k1,181:27143237,35137063:217749
x1,181:28154455,35137063
k1,181:28372204,35137063:217749
x1,181:29053778,35137063
x1,181:29964727,35137063
x1,181:30088590,35137063
$1,181:30154126,35137063
(1,181:30154126,34899168:839646,324246,58025
x1,181:30314505,34899168
(1,181:30314505,34899168:486120,306813,2489
x1,181:30800625,34899168
)
x1,181:30961004,34899168
)
$1,181:30993772,35137063
k1,181:31211521,35137063:217749
x1,181:32261406,35137063
k1,181:32261406,35137063:0
)
(1,182:7882014,35923495:24379392,449576,135003
x1,182:8955492,35923495
x1,182:9669834,35923495
x1,182:9904452,35923495
x1,182:10382208,35923495
g1,181:10517867,35923495
x1,181:11164707,35923495
x1,181:11474692,35923495
x1,181:12034369,35923495
x1,181:13398827,35923495
g1,181:13534486,35923495
x1,181:14074502,35923495
g1,181:14210161,35923495
x1,181:15501219,35923495
g1,181:15636878,35923495
x1,181:17474506,35923495
g1,181:17610165,35923495
x1,181:18425432,35923495
x1,181:20080214,35923495
g1,181:20215873,35923495
x1,181:20642511,35923495
x1,181:21542975,35923495
g1,181:21678634,35923495
x1,181:23056855,35923495
g1,181:23192514,35923495
x1,181:23630949,35923495
g1,181:23766608,35923495
x1,181:24369538,35923495
x1,181:24970502,35923495
x1,181:26464721,35923495
g1,181:26600380,35923495
x1,181:27178407,35923495
g1,181:27314066,35923495
x1,181:27679756,35923495
x1,181:28032339,35923495
x1,181:28180450,35923495
g1,181:28348877,35923495
x1,181:29199532,35923495
h1,181:29199532,35923495:0,0,0
x1,181:29570465,35923495
k1,182:32261406,35923495:2690941
g1,182:32261406,35923495
)
(1,183:7882014,36716526:24379392,0,0
h1,183:7882014,36716526:655360,0,0
k1,183:32261406,36716526:23724032
g1,183:32261406,36716526
)
(1,185:17436610,37522755:14824796,426639,115723
(1,185:17436610,37522755:5270201,426639,115723
x1,185:17880288,37522755
(1,185:17880288,37621058:249430,226623,3984
x1,185:18083502,37621058
)
x1,185:18289626,37522755
g1,185:18353704,37522755
[1,185:18353704,37522755:688100,413531,115723
(1,185:18474945,37512925:0,403701,0
x1,185:18716117,37512925
)
(1,185:18353704,37522755:688100,298188,115723
x1,185:18724637,37522755
(1,185:18724637,37634494:317167,342425,3984
x1,185:18989114,37634494
)
)
]
x1,185:19252829,37522755
(1,185:19252829,37522755:487981,371589,102287
x1,185:19491380,37522755
(1,185:19491380,37621058:249430,226623,3984
x1,185:19694594,37621058
)
)
x1,185:20316870,37522755
g1,185:20380948,37522755
x1,185:20648334,37522755
g1,185:20778165,37522755
x1,185:21212013,37522755
g1,185:21324149,37522755
x1,185:21803872,37522755
g1,185:21867950,37522755
x1,185:22701568,37522755
)
(1,185:31199726,37522755:1061680,426639,76349
(1,185:31199726,37522755:1061680,426639,76349
x1,185:32050381,37522755
x1,185:32261406,37522755
)
)
)
(1,188:7882014,38728799:24379392,449576,135003
h1,187:7882014,38728799:655360,0,0
x1,187:9587259,38728799
k1,187:9711902,38728799:124643
x1,187:10021887,38728799
x1,187:10491123,38728799
x1,187:11069805,38728799
k1,187:11194449,38728799:124644
x1,187:11742985,38728799
k1,187:11867628,38728799:124643
x1,187:12255601,38728799
x1,187:13269441,38728799
k1,187:13394074,38728799:124633
x1,187:13832509,38728799
k1,187:13957152,38728799:124643
x1,187:14560082,38728799
x1,187:15161046,38728799
x1,187:16655265,38728799
k1,187:16779909,38728799:124644
x1,187:17357936,38728799
k1,187:17482579,38728799:124643
x1,187:17848269,38728799
x1,187:18200852,38728799
x1,187:18348963,38728799
k1,187:18513719,38728799:164756
x1,187:19364374,38728799
h1,187:19364374,38728799:0,0,0
x1,187:19735307,38728799
k1,187:19862153,38728799:126846
x1,187:21235785,38728799
x1,187:21533973,38728799
k1,187:21658617,38728799:124644
$1,187:21658617,38728799
[1,187:21658617,38728799:846488,413531,102287
(1,187:21779858,38718969:0,403701,0
x1,187:22021030,38718969
)
(1,187:21658617,38728799:846488,298188,102287
x1,187:22029550,38728799
(1,187:22029550,38827102:475555,226623,3984
x1,187:22462376,38827102
)
)
]
x1,187:22954681,38728799
x1,187:23210270,38728799
$1,187:23210270,38728799
k1,187:23334913,38728799:124643
x1,187:23773348,38728799
k1,187:23897992,38728799:124644
x1,187:24780760,38728799
k1,187:24905403,38728799:124643
x1,187:25925143,38728799
x1,187:26680772,38728799
x1,187:27046462,38728799
x1,187:28022947,38728799
k1,187:28147591,38728799:124644
x1,187:29803684,38728799
k1,187:29928327,38728799:124643
x1,187:31157781,38728799
x1,187:32261406,38728799
k1,187:32261406,38728799:0
)
(1,188:7882014,39515231:24379392,449576,135003
x1,188:8977118,39515231
k1,187:9120392,39515231:143274
x1,187:9668928,39515231
x1,187:10186006,39515231
x1,187:11134966,39515231
x1,187:12398498,39515231
k1,187:12541772,39515231:143274
x1,187:13424540,39515231
k1,187:13567814,39515231:143274
x1,187:14347691,39515231
k1,187:14490966,39515231:143275
x1,187:15030982,39515231
k1,187:15174256,39515231:143274
x1,187:15973139,39515231
x1,187:16506601,39515231
x1,187:17477187,39515231
x1,187:18143688,39515231
k1,187:18286962,39515231:143274
x1,187:19360440,39515231
x1,187:20074782,39515231
x1,187:20309400,39515231
x1,187:20787156,39515231
k1,187:20930430,39515231:143274
x1,187:21577270,39515231
x1,187:21887255,39515231
x1,187:22446932,39515231
x1,187:24074189,39515231
x1,187:24222300,39515231
k1,187:24413573,39515231:191273
x1,187:25591908,39515231
k1,187:25735182,39515231:143274
x1,187:26754922,39515231
x1,187:27510551,39515231
x1,187:27876241,39515231
x1,187:28852726,39515231
k1,187:28996000,39515231:143274
x1,187:30652093,39515231
k1,187:30795367,39515231:143274
x1,187:32024821,39515231
x1,187:32261406,39515231
k1,188:32261406,39515231:0
)
(1,188:7882014,40301663:24379392,449576,148438
x1,188:8985639,40301663
k1,187:9119897,40301663:134258
x1,187:10106869,40301663
k1,187:10241127,40301663:134258
x1,187:10911560,40301663
k1,187:11045818,40301663:134258
x1,187:11933830,40301663
x1,187:12583290,40301663
k1,187:12717549,40301663:134259
x1,187:13320479,40301663
x1,187:13762190,40301663
x1,187:15247889,40301663
k1,187:15382147,40301663:134258
x1,187:15808785,40301663
x1,187:16709249,40301663
k1,187:16843507,40301663:134258
x1,187:17726275,40301663
k1,187:17860533,40301663:134258
x1,187:19177806,40301663
x1,187:20361384,40301663
k1,187:20495642,40301663:134258
x1,187:21367270,40301663
x1,187:21808981,40301663
x1,187:22442057,40301663
k1,187:22610017,40301663:167960
x1,187:22959979,40301663
x1,187:23318460,40301663
x1,187:23553078,40301663
x1,187:24440433,40301663
x1,187:24675051,40301663
x1,187:25818652,40301663
x1,187:26116840,40301663
x1,187:26264951,40301663
k1,187:26399490,40301663:134539
x1,187:26714718,40301663
k1,187:26848976,40301663:134258
x1,187:27953912,40301663
x1,187:28129548,40301663
x1,187:29466481,40301663
x1,187:30570106,40301663
k1,187:30704364,40301663:134258
x1,187:31244380,40301663
k1,187:31378638,40301663:134258
x1,187:32261406,40301663
k1,187:32261406,40301663:0
)
(1,188:7882014,41088095:24379392,449576,135003
x1,188:8418098,41088095
x1,188:9112124,41088095
x1,188:9346742,41088095
x1,188:10626659,41088095
g1,187:10762318,41088095
x1,187:11200753,41088095
g1,187:11336412,41088095
x1,187:12430862,41088095
g1,187:12566521,41088095
x1,187:13088842,41088095
x1,187:15566100,41088095
k1,188:32261406,41088095:16695306
g1,188:32261406,41088095
)
(1,189:7882014,41881125:24379392,0,0
h1,189:7882014,41881125:655360,0,0
k1,189:32261406,41881125:23724032
g1,189:32261406,41881125
)
(1,191:16028178,43036425:16233228,1069967,676561
(1,191:16028178,43036425:8087064,1069967,676561
x1,191:16334231,43036425
g1,191:16457508,43036425
x1,191:16891356,43036425
g1,191:17003492,43036425
[1,191:17003492,43036425:1015571,1069967,676561
(1,191:17003492,42347261:1015571,320510,77713
k1,191:17121169,42347261:117677
x1,191:17490739,42347261
(1,191:17490739,42424974:410647,253034,0
x1,191:17843060,42424974
)
k1,191:18019063,42347261:117677
)
(1,191:17003492,43036425:1015571,544459,204983
k1,191:17178461,43036425:174969
(1,191:17178461,42491966:665634,0,749442
x1,191:17844095,42491966
)
k1,191:18019063,43036425:174968
)
(1,191:17003492,43648709:1015571,306813,3984
x1,191:17436318,43648709
x1,191:18019063,43648709
)
]
g1,191:18083141,43036425
(1,191:18083141,42198038:298450,0,1337298
x1,191:18381591,42198038
)
[1,191:18381591,43560239:640468,1490455,2489
(1,191:18639645,42390294:382414,320510,0
x1,191:18927531,42390294
)
(1,191:18381591,43560239:275828,306813,2489
x1,191:18624651,43560239
)
]
x1,191:19604017,43036425
(1,191:19604017,43134728:475555,226623,3984
x1,191:20036843,43134728
)
x1,191:20529148,43036425
x1,191:20784737,43036425
g1,191:20864834,43036425
x1,191:21298682,43036425
g1,191:21378779,43036425
[1,191:21378779,43036425:846488,413531,102287
(1,191:21500020,43026595:0,403701,0
x1,191:21741192,43026595
)
(1,191:21378779,43036425:846488,298188,102287
x1,191:21749712,43036425
(1,191:21749712,43134728:475555,226623,3984
x1,191:22182538,43134728
)
)
]
x1,191:22674843,43036425
x1,191:23141457,43036425
(1,191:23141457,42765762:275828,306813,0
x1,191:23384517,42765762
)
x1,191:23790840,43036425
x1,191:24070678,43036425
)
(1,191:31199726,43036425:1061680,426639,76349
(1,191:31199726,43036425:1061680,426639,76349
x1,191:32050381,43036425
x1,191:32261406,43036425
)
)
)
(1,194:7882014,44647710:24379392,449576,135003
h1,193:7882014,44647710:655360,0,0
x1,193:9293004,44647710
g1,193:9428663,44647710
x1,193:12966292,44647710
g1,193:13101951,44647710
x1,193:13702915,44647710
x1,193:15442239,44647710
g1,193:15577898,44647710
x1,193:16352532,44647710
g1,193:16488191,44647710
x1,193:16876164,44647710
x1,193:17890004,44647710
g1,193:18025663,44647710
x1,193:18464098,44647710
g1,193:18599757,44647710
x1,193:19270190,44647710
x1,193:20681179,44647710
g1,193:20816838,44647710
x1,193:21394865,44647710
g1,193:21530524,44647710
x1,193:21896214,44647710
x1,193:22511596,44647710
x1,193:22659707,44647710
g1,193:22828134,44647710
x1,193:23678789,44647710
h1,193:23678789,44647710:0,0,0
g1,193:23814448,44647710
x1,193:24863024,44647710
g1,193:24998683,44647710
x1,193:25638313,44647710
h1,193:25638313,44647710:0,0,0
x1,193:25849338,44647710
k1,194:32261406,44647710:6412068
g1,194:32261406,44647710
)
]
(1,197:7882014,46613790:24379392,0,0
h1,197:7882014,46613790:24379392,0,0
)
]
]
!41900
}5
!10
{6
[1,239:4736286,46613790:27590656,41877504,0
[1,239:7947550,46613790:24379392,41222144,0
[1,239:7947550,6178078:24379392,786432,0
(1,239:7947550,6800670:24379392,1409024,0
(1,239:7947550,6800670:24379392,1409024,0
[1,239:7947550,6800670:24379392,1409024,0
(1,239:7947550,5457182:24379392,65536,0
h1,239:7947550,5457182:0,0,0
(1,239:7947550,5457182:24379392,65536,0
r1,239:32326942,5457182:24379392,65536,0
)
g1,239:32326942,5457182
g1,239:32326942,5457182
)
(1,239:7947550,6276382:24379392,395657,4046
x1,239:8282504,6276382
k1,239:32326942,6276382:24044438
)
(1,239:7947550,6276382:24379392,395657,68796
(1,239:7947550,6276382:24379392,395657,68796
k1,239:16323621,6276382:8376071
x1,239:17415634,6276382
g1,239:17544510,6276382
x1,239:18574257,6276382
x1,239:19653817,6276382
x1,239:21488556,6276382
g1,239:21617432,6276382
x1,239:23950872,6276382
k1,239:32326942,6276382:8376070
)
)
(1,239:7947550,6800670:24379392,65536,0
h1,239:7947550,6800670:0,0,0
(1,239:7947550,6800670:24379392,65536,0
r1,239:32326942,6800670:24379392,65536,0
)
g1,239:32326942,6800670
g1,239:32326942,6800670
)
]
)
)
]
[1,239:7947550,44647710:24379392,36831232,0
(1,195:7947550,8471838:24379392,0,0
h1,195:7947550,8471838:655360,0,0
k1,195:32326942,8471838:23724032
g1,195:32326942,8471838
)
(1,197:16818953,9823464:15507989,1069967,712173
(1,197:16818953,9823464:6636586,1069967,712173
(1,197:16818953,8985077:298450,0,1337298
x1,197:17117403,8985077
)
[1,197:17117403,10347278:640468,1490455,2489
(1,197:17375457,9177333:382414,320510,0
x1,197:17663343,9177333
)
(1,197:17117403,10347278:275828,306813,2489
x1,197:17360463,10347278
)
]
g1,197:17821949,9823464
[1,197:17821949,9823464:857183,1069967,712173
(1,197:17821949,9134300:857183,320510,77713
k1,197:17860432,9134300:38483
x1,197:18230002,9134300
(1,197:18230002,9212013:410647,253034,0
x1,197:18582323,9212013
)
k1,197:18679132,9134300:38483
)
(1,197:17821949,9823464:857183,544459,204983
k1,197:17917724,9823464:95775
(1,197:17917724,9279005:665634,0,749442
x1,197:18583358,9279005
)
k1,197:18679132,9823464:95774
)
(1,197:17821949,10471360:857183,342425,3984
x1,197:18086426,10471360
x1,197:18679132,10471360
)
]
x1,197:19261090,9823464
(1,197:19261090,9935203:317167,342425,3984
x1,197:19525567,9935203
)
x1,197:20027833,9823464
x1,197:20283422,9823464
g1,197:20363519,9823464
x1,197:20797367,9823464
g1,197:20877464,9823464
[1,197:20877464,9823464:688100,413531,115723
(1,197:21100928,9813634:0,403701,0
x1,197:21342100,9813634
)
(1,197:20877464,9823464:688100,298188,115723
x1,197:21248397,9823464
(1,197:21248397,9935203:317167,342425,3984
x1,197:21512874,9935203
)
)
]
x1,197:22015140,9823464
x1,197:22481754,9823464
(1,197:22481754,9552801:275828,306813,0
x1,197:22724814,9552801
)
x1,197:23131137,9823464
x1,197:23410975,9823464
)
(1,197:31265262,9823464:1061680,426639,76349
(1,197:31265262,9823464:1061680,426639,76349
x1,197:32115917,9823464
x1,197:32326942,9823464
)
)
)
(1,200:8447770,12496601:23879172,1069967,712173
(1,200:8447770,12496601:22317272,1069967,712173
x1,200:8732196,12496601
g1,200:8875133,12496601
x1,200:9308981,12496601
g1,200:9421117,12496601
(1,200:9421117,11658214:298450,0,1337298
x1,200:9719567,11658214
)
[1,200:9719567,13020415:640468,1490455,2489
(1,200:9977621,11850470:382414,320510,0
x1,200:10265507,11850470
)
(1,200:9719567,13020415:275828,306813,2489
x1,200:9962627,13020415
)
]
g1,200:10424113,12496601
[1,200:10424113,12496601:857183,1069967,712173
(1,200:10424113,11807437:857183,320510,77713
k1,200:10462596,11807437:38483
x1,200:10832166,11807437
(1,200:10832166,11885150:410647,253034,0
x1,200:11184487,11885150
)
k1,200:11281296,11807437:38483
)
(1,200:10424113,12496601:857183,544459,204983
k1,200:10519888,12496601:95775
(1,200:10519888,11952142:665634,0,749442
x1,200:11185522,11952142
)
k1,200:11281296,12496601:95774
)
(1,200:10424113,13144497:857183,342425,3984
x1,200:10688590,13144497
x1,200:11281296,13144497
)
]
x1,200:11863254,12496601
(1,200:11863254,12608340:317167,342425,3984
x1,200:12127731,12608340
)
x1,200:12629997,12496601
x1,200:12885586,12496601
g1,200:12965683,12496601
x1,200:13399531,12496601
g1,200:13479628,12496601
[1,200:13479628,12496601:688100,413531,115723
(1,200:13703092,12486771:0,403701,0
x1,200:13944264,12486771
)
(1,200:13479628,12496601:688100,298188,115723
x1,200:13850561,12496601
(1,200:13850561,12608340:317167,342425,3984
x1,200:14115038,12608340
)
)
]
x1,200:14617304,12496601
x1,200:15083918,12496601
(1,200:15083918,12225938:275828,306813,0
x1,200:15326978,12225938
)
x1,200:15733301,12496601
x1,200:16013139,12496601
g1,200:16137800,12496601
x1,200:16571648,12496601
g1,200:16651745,12496601
(1,200:16651745,11658214:298450,0,1337298
x1,200:16950195,11658214
)
[1,200:16950195,13020415:640468,1490455,2489
(1,200:17208249,11850470:382414,320510,0
x1,200:17496135,11850470
)
(1,200:16950195,13020415:275828,306813,2489
x1,200:17193255,13020415
)
]
g1,200:17654741,12496601
x1,200:18011256,12496601
(1,200:18011256,12608340:317167,342425,3984
x1,200:18275733,12608340
)
g1,200:18392501,12496601
(1,200:18392501,12496601:11610506,531499,215622
(1,200:18392501,11989218:251222,24116,699406
x1,200:18643723,11989218
)
[1,200:18643723,12496601:688100,413531,115723
(1,200:18764964,12486771:0,403701,0
x1,200:19006136,12486771
)
(1,200:18643723,12496601:688100,298188,115723
x1,200:19014656,12496601
(1,200:19014656,12608340:317167,342425,3984
x1,200:19279133,12608340
)
)
]
x1,200:19781399,12496601
x1,200:20036988,12496601
g1,200:20117085,12496601
x1,200:20550933,12496601
g1,200:20631030,12496601
x1,200:21079296,12496601
[1,200:21079296,12708239:317167,741299,3984
(1,200:21079296,12225938:167746,258998,0
x1,200:21214274,12225938
)
(1,200:21079296,12708239:317167,342425,3984
x1,200:21343773,12708239
)
]
g1,200:21476560,12496601
x1,200:21910408,12496601
g1,200:21990505,12496601
x1,200:22397483,12496601
[1,200:22397483,12708239:759954,741299,3984
(1,200:22432872,12225938:167746,258998,0
x1,200:22567850,12225938
)
(1,200:22397483,12708239:759954,342425,3984
x1,200:22661960,12708239
x1,200:23114708,12708239
)
]
x1,200:23528370,12496601
(1,200:23528370,12594904:475555,226623,3984
x1,200:23961196,12594904
)
x1,200:24453501,12496601
x1,200:24709090,12496601
g1,200:24789187,12496601
x1,200:25223035,12496601
g1,200:25303132,12496601
x1,200:25714698,12496601
(1,200:25714698,12608340:1068261,342425,3984
x1,200:25979175,12608340
x1,200:26431923,12608340
x1,200:26740230,12608340
)
x1,200:27153892,12496601
(1,200:27153892,12594904:341075,226623,3984
x1,200:27452238,12594904
)
x1,200:27944543,12496601
x1,200:28571065,12496601
(1,200:28571065,12594904:475555,226623,3984
x1,200:29003891,12594904
)
x1,200:29496196,12496601
x1,200:29751785,12496601
(1,200:29751785,11989218:251222,24116,699406
x1,200:30003007,11989218
)
)
g1,200:30067085,12496601
x1,200:30440640,12496601
x1,200:30720478,12496601
)
(1,200:31265262,12496601:1061680,426639,76349
(1,200:31265262,12496601:1061680,426639,76349
x1,200:32115917,12496601
x1,200:32326942,12496601
)
)
)
(1,204:7947550,14452583:24379392,496893,248390
h1,203:7947550,14452583:655360,0,0
x1,203:9976542,14452583
x1,203:10274730,14452583
k1,203:10477369,14452583:202639
$1,203:10477369,14452583
x1,203:10925635,14452583
[1,203:10925635,14696989:317167,741299,3984
(1,203:10925635,14214688:167746,258998,0
x1,203:11060613,14214688
)
(1,203:10925635,14696989:317167,342425,3984
x1,203:11190112,14696989
)
]
$1,203:11242802,14452583
k1,203:11445441,14452583:202639
x1,203:12494017,14452583
k1,203:12696657,14452583:202640
$1,203:12696657,14452583
x1,203:13103635,14452583
[1,203:13103635,14696989:317167,741299,3984
(1,203:13139024,14214688:167746,258998,0
x1,203:13274002,14214688
)
(1,203:13103635,14696989:317167,342425,3984
x1,203:13368112,14696989
)
]
$1,203:13420802,14452583
k1,203:13623441,14452583:202639
x1,203:14173287,14452583
x1,203:14471475,14452583
k1,203:14674114,14452583:202639
x1,203:15556882,14452583
k1,203:15759521,14452583:202639
x1,203:17312722,14452583
x1,203:18499577,14452583
k1,203:18702217,14452583:202640
x1,203:19284831,14452583
x1,203:20731864,14452583
x1,203:21048402,14452583
k1,203:21251041,14452583:202639
x1,203:21787125,14452583
x1,203:22715769,14452583
x1,203:24253241,14452583
k1,203:24455880,14452583:202639
x1,203:26906923,14452583
k1,203:27109562,14452583:202639
x1,203:28826602,14452583
k1,203:29029174,14452583:202572
x1,203:29985999,14452583
x1,203:32172933,14452583
x1,203:32326942,14452583
k1,203:32326942,14452583:0
)
(1,204:7947550,15239015:24379392,450560,148438
x1,204:8996126,15239015
k1,203:9116343,15239015:120217
$1,203:9116343,15239015
x1,203:9472858,15239015
(1,203:9472858,15350754:317167,342425,3984
x1,203:9737335,15350754
)
$1,203:9790025,15239015
k1,203:9910242,15239015:120217
x1,203:10348677,15239015
k1,203:10468893,15239015:120216
x1,203:11351661,15239015
k1,203:11471878,15239015:120217
x1,203:12677738,15239015
x1,203:13983213,15239015
k1,203:14103430,15239015:120217
x1,203:16831688,15239015
x1,203:16955551,15239015
k1,203:17118831,15239015:163280
x1,203:17687683,15239015
x1,203:18251947,15239015
x1,203:18898131,15239015
x1,203:19183867,15239015
x1,203:19725193,15239015
x1,203:19849056,15239015
k1,203:19972361,15239015:123305
x1,203:20855129,15239015
k1,203:20975346,15239015:120217
x1,203:24512975,15239015
k1,203:24633192,15239015:120217
x1,203:25234156,15239015
x1,203:26973480,15239015
k1,203:27093697,15239015:120217
x1,203:27633713,15239015
k1,203:27753929,15239015:120216
x1,203:28636697,15239015
k1,203:28756914,15239015:120217
x1,203:29873646,15239015
k1,203:29993863,15239015:120217
x1,203:32326942,15239015
k1,203:32326942,15239015:0
)
(1,204:7947550,16025447:24379392,449576,135003
x1,204:8231976,16025447
$1,203:8262777,16025447
g1,203:8398436,16025447
x1,203:9385408,16025447
g1,203:9521067,16025447
x1,203:10191500,16025447
g1,203:10327159,16025447
x1,203:11025116,16025447
x1,203:12302410,16025447
g1,203:12438069,16025447
x1,203:13016096,16025447
g1,203:13151755,16025447
x1,203:13517445,16025447
x1,203:13870028,16025447
x1,203:14018139,16025447
g1,203:14186566,16025447
x1,203:15037221,16025447
h1,203:15037221,16025447:0,0,0
x1,203:15248246,16025447
k1,204:32326942,16025447:17078696
g1,204:32326942,16025447
)
(1,205:7947550,16883920:24379392,0,0
h1,205:7947550,16883920:655360,0,0
k1,205:32326942,16883920:23724032
g1,205:32326942,16883920
)
(1,215:10762631,20015610:21564311,2850032,2510555
(1,215:10762631,20015610:18749230,2850032,2510555
h1,207:10762631,20015610:0,0,0
[1,214:10762631,20015610:18749230,2850032,2510555
(1,208:10762631,17716078:18749230,550500,235932
g1,207:10762631,17716078
(1,208:10762631,17716078:18749230,550500,235932
k1,207:11236550,17716078:473919
(1,207:11236550,17716078:0,550500,235932
[1,207:11236550,17716078:0,550500,235932
(1,28:11236550,17716078:0,550500,235932
r1,207:11236550,17716078:0,786432,235932
)
]
)
$1,208:11236550,17716078
[1,208:11236550,17716078:688100,413531,115723
(1,208:11357791,17706248:0,403701,0
x1,208:11598963,17706248
)
(1,208:11236550,17716078:688100,298188,115723
x1,208:11607483,17716078
(1,208:11607483,17827817:317167,342425,3984
x1,208:11871960,17827817
)
)
]
x1,208:12374226,17716078
x1,208:12629815,17716078
g1,208:12741951,17716078
x1,208:13175799,17716078
g1,208:13287935,17716078
x1,208:13736201,17716078
[1,208:13736201,17927716:317167,741299,3984
(1,208:13736201,17445415:167746,258998,0
x1,208:13871179,17445415
)
(1,208:13736201,17927716:317167,342425,3984
x1,208:14000678,17927716
)
]
g1,208:14133465,17716078
x1,208:14567313,17716078
g1,208:14647410,17716078
x1,208:15054388,17716078
[1,208:15054388,17927716:759954,741299,3984
(1,208:15089777,17445415:167746,258998,0
x1,208:15224755,17445415
)
(1,208:15054388,17927716:759954,342425,3984
x1,208:15318865,17927716
x1,208:15771613,17927716
)
]
x1,208:16185275,17716078
(1,208:16185275,17814381:475555,226623,3984
x1,208:16618101,17814381
)
x1,208:17110406,17716078
x1,208:17365995,17716078
g1,208:17446092,17716078
x1,208:17879940,17716078
g1,208:17960037,17716078
x1,208:18371603,17716078
(1,208:18371603,17827817:1068261,342425,3984
x1,208:18636080,17827817
x1,208:19088828,17827817
x1,208:19397135,17827817
)
x1,208:19810797,17716078
(1,208:19810797,17814381:341075,226623,3984
x1,208:20109143,17814381
)
x1,208:20601448,17716078
x1,208:21227970,17716078
(1,208:21227970,17814381:475555,226623,3984
x1,208:21660796,17814381
)
x1,208:22153101,17716078
x1,208:22568598,17716078
g1,207:23145314,17716078
g1,207:23722030,17716078
g1,208:23786108,17716078
x1,208:24157041,17716078
(1,208:24157041,17827817:317167,342425,3984
x1,208:24421518,17827817
)
x1,208:25216073,17716078
g1,208:25328209,17716078
x1,208:25762057,17716078
g1,208:25874193,17716078
(1,208:25874193,17716078:3163750,426639,115723
(1,208:25874193,17721485:211025,426639,76349
x1,208:26085218,17721485
)
x1,208:26477778,17716078
x1,208:27045973,17716078
x1,208:27228163,17716078
g1,208:27292241,17716078
x1,208:27982989,17716078
g1,208:28047067,17716078
x1,208:28509751,17716078
(1,208:28509751,17827817:317167,342425,3984
x1,208:28774228,17827817
)
(1,208:28826918,17721485:211025,426639,76349
x1,208:29037943,17721485
)
)
$1,208:29037943,17716078
k1,208:29511861,17716078:473918
)
g1,208:29511861,17716078
)
(1,210:10762631,18780057:18749230,565903,235932
g1,209:10762631,18780057
(1,210:10762631,18780057:18749230,565903,235932
g1,209:10762631,18780057
(1,207:10762631,18780057:0,550500,235932
[1,207:10762631,18780057:0,550500,235932
(1,28:10762631,18780057:0,550500,235932
r1,209:10762631,18780057:0,786432,235932
)
]
)
$1,210:10762631,18780057
[1,210:10762631,18780057:673682,565903,115723
(1,210:10843239,18617855:0,403701,0
x1,210:11084411,18617855
)
(1,210:10762631,18780057:673682,450560,115723
x1,210:11119146,18780057
(1,210:11119146,18891796:317167,342425,3984
x1,210:11383623,18891796
)
)
]
x1,210:11885889,18780057
x1,210:12141478,18780057
g1,210:12253614,18780057
x1,210:12687462,18780057
g1,210:12799598,18780057
(1,210:12799598,18780057:7790817,531499,215622
(1,210:12799598,18272674:251222,24116,699406
x1,210:13050820,18272674
)
x1,210:13457798,18780057
[1,210:13457798,18991695:759954,741299,3984
(1,210:13493187,18509394:167746,258998,0
x1,210:13628165,18509394
)
(1,210:13457798,18991695:759954,342425,3984
x1,210:13722275,18991695
x1,210:14175023,18991695
)
]
g1,210:14297849,18780057
x1,210:14731697,18780057
g1,210:14811794,18780057
x1,210:15434385,18780057
(1,210:15434385,18891796:1068261,342425,3984
x1,210:15732731,18891796
x1,210:16007169,18891796
x1,210:16459917,18891796
)
g1,210:16582743,18780057
x1,210:17016591,18780057
g1,210:17096688,18780057
x1,210:17508254,18780057
(1,210:17508254,18891796:1068261,342425,3984
x1,210:17806600,18891796
x1,210:18249387,18891796
x1,210:18523825,18891796
)
x1,210:18947448,18780057
(1,210:18947448,18878360:475555,226623,3984
x1,210:19380274,18878360
)
x1,210:19872579,18780057
x1,210:20339193,18780057
(1,210:20339193,18272674:251222,24116,699406
x1,210:20590415,18272674
)
)
g1,210:20654493,18780057
x1,210:21011008,18780057
(1,210:21011008,18891796:317167,342425,3984
x1,210:21275485,18891796
)
x1,210:21777751,18780057
x1,210:22033340,18780057
g1,210:22113437,18780057
x1,210:22547285,18780057
g1,210:22627382,18780057
x1,210:23517359,18780057
(1,210:23517359,18891796:317167,342425,3984
x1,210:23781836,18891796
)
x1,210:24284102,18780057
x1,210:24539691,18780057
g1,210:24619788,18780057
x1,210:25053636,18780057
g1,210:25133733,18780057
[1,210:25133733,18780057:688100,413531,115723
(1,210:25254974,18770227:0,403701,0
x1,210:25496146,18770227
)
(1,210:25133733,18780057:688100,298188,115723
x1,210:25504666,18780057
(1,210:25504666,18891796:317167,342425,3984
x1,210:25769143,18891796
)
)
]
x1,210:26271409,18780057
x1,210:26886135,18780057
g1,210:26950213,18780057
[1,210:26950213,18780057:673682,565903,115723
(1,210:27166468,18617855:0,403701,0
x1,210:27407640,18617855
)
(1,210:26950213,18780057:673682,450560,115723
x1,210:27306728,18780057
(1,210:27306728,18891796:317167,342425,3984
x1,210:27571205,18891796
)
)
]
x1,210:28073471,18780057
(1,210:28073471,18878360:249430,226623,3984
x1,210:28276685,18878360
)
x1,210:28533926,18780057
g1,210:28646062,18780057
x1,210:29079910,18780057
g1,210:29192046,18780057
x1,210:29511861,18780057
$1,210:29511861,18780057
g1,210:29511861,18780057
)
g1,210:29511861,18780057
)
(1,212:10762631,20244774:18749230,966641,526303
g1,211:10762631,20244774
(1,212:10762631,20244774:18749230,966641,526303
k1,211:18108379,20244774:7345748
(1,207:18108379,20244774:0,550500,235932
[1,207:18108379,20244774:0,550500,235932
(1,28:18108379,20244774:0,550500,235932
r1,211:18108379,20244774:0,786432,235932
)
]
)
$1,212:18108379,20244774
(1,212:18108379,19406387:298450,0,1337298
x1,212:18406829,19406387
)
[1,212:18406829,20768588:640468,1490455,2489
(1,212:18664883,19598643:382414,320510,0
x1,212:18952769,19598643
)
(1,212:18406829,20768588:275828,306813,2489
x1,212:18649889,20768588
)
]
g1,212:19111375,20244774
x1,212:19467890,20244774
(1,212:19467890,20356513:317167,342425,3984
x1,212:19732367,20356513
)
x1,212:20234633,20244774
x1,212:20863777,20244774
x1,212:21143615,20244774
g1,212:21300315,20244774
x1,212:21734163,20244774
g1,212:21846299,20244774
x1,212:22166114,20244774
$1,212:22166114,20244774
k1,212:29511861,20244774:7345747
)
g1,212:29511861,20244774
)
(1,214:10762631,21999862:18749230,966641,526303
g1,213:10762631,21999862
(1,214:10762631,21999862:18749230,966641,526303
k1,213:17399792,21999862:6637161
(1,207:17399792,21999862:0,550500,235932
[1,207:17399792,21999862:0,550500,235932
(1,28:17399792,21999862:0,550500,235932
r1,213:17399792,21999862:0,786432,235932
)
]
)
$1,214:17399792,21999862
(1,214:17399792,21161475:298450,0,1337298
x1,214:17698242,21161475
)
[1,214:17698242,22523676:640468,1490455,2489
(1,214:17956296,21353731:382414,320510,0
x1,214:18244182,21353731
)
(1,214:17698242,22523676:275828,306813,2489
x1,214:17941302,22523676
)
]
g1,214:18402788,21999862
x1,214:18773721,21999862
(1,214:18773721,22098165:341075,226623,3984
x1,214:19072067,22098165
)
x1,214:19564372,21999862
x1,214:20176476,21999862
(1,214:20176476,22111601:317167,342425,3984
x1,214:20440953,22111601
)
x1,214:20943219,21999862
x1,214:21572363,21999862
x1,214:21852201,21999862
g1,214:22008901,21999862
x1,214:22442749,21999862
g1,214:22554885,21999862
x1,214:22874700,21999862
$1,214:22874700,21999862
k1,214:29511861,21999862:6637161
)
g1,214:29511861,21999862
)
]
)
(1,215:31265262,20015610:1061680,426639,76349
(1,215:31265262,20015610:1061680,426639,76349
x1,215:32115917,20015610
x1,215:32326942,20015610
)
)
)
(1,218:7947550,23722657:24379392,449576,3276
h1,217:7947550,23722657:655360,0,0
x1,217:9976542,23722657
x1,217:10274730,23722657
k1,218:32326942,23722657:22052212
g1,218:32326942,23722657
)
(1,219:7947550,24581130:24379392,0,0
h1,219:7947550,24581130:655360,0,0
k1,219:32326942,24581130:23724032
g1,219:32326942,24581130
)
(1,227:12674358,26990084:19652584,2127295,1787819
(1,227:12674358,26990084:14925776,2127295,1787819
h1,221:12674358,26990084:0,0,0
[1,226:12674358,26990084:14925776,2127295,1787819
(1,222:12674358,25710168:14925776,847379,454818
g1,221:12674358,25710168
(1,222:12674358,25710168:14925776,847379,454818
k1,221:15748276,25710168:3073918
(1,221:15748276,25710168:0,550500,235932
[1,221:15748276,25710168:0,550500,235932
(1,28:15748276,25710168:0,550500,235932
r1,221:15748276,25710168:0,786432,235932
)
]
)
$1,222:15748276,25710168
x1,222:16196542,25710168
(1,222:16196542,25821907:317167,342425,3984
x1,222:16461019,25821907
)
g1,222:16625845,25710168
x1,222:17059693,25710168
g1,222:17171829,25710168
(1,222:17171829,25710168:900464,847379,454818
(1,222:17171829,25710168:900464,847379,454818
h1,222:17171829,25710168:78643,0,0
[1,222:17250472,25710168:743178,847379,454818
(1,222:17250472,25266490:743178,403701,0
k1,222:17462154,25266490:211682
x1,222:17781969,25266490
k1,222:17993650,25266490:211681
)
(1,222:17250472,26159743:743178,421723,5242
x1,222:17656140,26159743
x1,222:17982509,26159743
)
]
h1,222:17993650,25710168:78643,0,0
)
)
g1,222:18136371,25710168
(1,222:18136371,25710168:2695842,577476,192023
(1,222:18136371,25202785:233936,24116,699406
x1,222:18370307,25202785
)
x1,222:18832991,25710168
(1,222:18832991,25821907:317167,342425,3984
x1,222:19097468,25821907
)
x1,222:19310066,25710168
g1,222:19374144,25710168
x1,222:19916782,25710168
(1,222:19916782,25439505:275828,306813,0
x1,222:20159842,25439505
)
[1,222:20192610,25710168:405667,413531,5242
(1,222:20324009,25700338:0,403701,0
x1,222:20565181,25700338
)
(1,222:20192610,25710168:405667,298188,5242
x1,222:20585170,25710168
)
]
(1,222:20598277,25202785:233936,24116,699406
x1,222:20832213,25202785
)
)
g1,222:20912310,25710168
x1,222:21346158,25710168
g1,222:21426255,25710168
(1,222:21426255,25710168:3099961,421723,115723
(1,222:21426255,25715575:211025,426639,76349
x1,222:21637280,25715575
)
x1,222:22099964,25710168
(1,222:22099964,25821907:317167,342425,3984
x1,222:22364441,25821907
)
x1,222:22577039,25710168
g1,222:22641117,25710168
[1,222:22641117,25710168:405667,413531,5242
(1,222:22772516,25700338:0,403701,0
x1,222:23013688,25700338
)
(1,222:22641117,25710168:405667,298188,5242
x1,222:23033677,25710168
)
]
x1,222:23206692,25710168
g1,222:23286789,25710168
x1,222:23829427,25710168
g1,222:23909524,25710168
[1,222:23909524,25710168:405667,413531,5242
(1,222:24040923,25700338:0,403701,0
x1,222:24282095,25700338
)
(1,222:23909524,25710168:405667,298188,5242
x1,222:24302084,25710168
)
]
(1,222:24315191,25715575:211025,426639,76349
x1,222:24526216,25715575
)
)
$1,222:24526216,25710168
k1,222:27600134,25710168:3073918
)
g1,222:27600134,25710168
)
(1,224:12674358,27274509:14925776,847379,454818
g1,223:12674358,27274509
(1,224:12674358,27274509:14925776,847379,454818
g1,223:12674358,27274509
(1,221:12674358,27274509:0,550500,235932
[1,221:12674358,27274509:0,550500,235932
(1,28:12674358,27274509:0,550500,235932
r1,223:12674358,27274509:0,786432,235932
)
]
)
$1,224:12674358,27274509
x1,224:13081336,27274509
(1,224:13081336,27386248:759954,342425,3984
x1,224:13345813,27386248
x1,224:13798561,27386248
)
g1,224:13953426,27274509
x1,224:14387274,27274509
g1,224:14499410,27274509
x1,224:14933258,27274509
g1,224:14997336,27274509
(1,224:14997336,27274509:3632533,421723,115723
(1,224:14997336,27279916:211025,426639,76349
x1,224:15208361,27279916
)
x1,224:15671045,27274509
(1,224:15671045,27386248:317167,342425,3984
x1,224:15935522,27386248
)
x1,224:16148120,27274509
g1,224:16212198,27274509
[1,224:16212198,27274509:405667,413531,5242
(1,224:16343597,27264679:0,403701,0
x1,224:16584769,27264679
)
(1,224:16212198,27274509:405667,298188,5242
x1,224:16604758,27274509
)
]
x1,224:16777773,27274509
g1,224:16857870,27274509
x1,224:17400508,27274509
g1,224:17480605,27274509
x1,224:17943289,27274509
(1,224:17943289,27372812:475555,226623,3984
x1,224:18376115,27372812
)
(1,224:18418844,27279916:211025,426639,76349
x1,224:18629869,27279916
)
)
g1,224:18709966,27274509
x1,224:19143814,27274509
g1,224:19223911,27274509
(1,224:19223911,27274509:3633790,531499,192023
(1,224:19223911,26767126:233936,24116,699406
x1,224:19457847,26767126
)
x1,224:19920531,27274509
(1,224:19920531,27386248:317167,342425,3984
x1,224:20185008,27386248
)
x1,224:20397606,27274509
g1,224:20461684,27274509
x1,224:20879803,27274509
(1,224:20879803,27372812:475555,226623,3984
x1,224:21312629,27372812
)
x1,224:21515266,27274509
g1,224:21595363,27274509
x1,224:22138001,27274509
g1,224:22218098,27274509
[1,224:22218098,27274509:405667,413531,5242
(1,224:22349497,27264679:0,403701,0
x1,224:22590669,27264679
)
(1,224:22218098,27274509:405667,298188,5242
x1,224:22610658,27274509
)
]
(1,224:22623765,26767126:233936,24116,699406
x1,224:22857701,26767126
)
)
g1,224:22937798,27274509
x1,224:23371646,27274509
g1,224:23451743,27274509
(1,224:23451743,27274509:900464,847379,454818
(1,224:23451743,27274509:900464,847379,454818
h1,224:23451743,27274509:78643,0,0
[1,224:23530386,27274509:743178,847379,454818
(1,224:23530386,26830831:743178,403701,0
k1,224:23742068,26830831:211682
x1,224:24061883,26830831
k1,224:24273564,26830831:211681
)
(1,224:23530386,27724084:743178,421723,5242
x1,224:23936054,27724084
x1,224:24262423,27724084
)
]
h1,224:24273564,27274509:78643,0,0
)
)
g1,224:24416285,27274509
(1,224:24416285,27274509:3183849,577476,192023
(1,224:24416285,26767126:233936,24116,699406
x1,224:24650221,26767126
)
x1,224:25112905,27274509
(1,224:25112905,27386248:317167,342425,3984
x1,224:25377382,27386248
)
x1,224:25589980,27274509
g1,224:25654058,27274509
x1,224:26196696,27274509
(1,224:26196696,27003846:275828,306813,0
x1,224:26439756,27003846
)
x1,224:26890643,27274509
(1,224:26890643,27372812:475555,226623,3984
x1,224:27323469,27372812
)
(1,224:27366198,26767126:233936,24116,699406
x1,224:27600134,26767126
)
)
$1,224:27600134,27274509
g1,224:27600134,27274509
)
g1,224:27600134,27274509
)
(1,226:12674358,28541971:14925776,550500,235932
g1,225:12674358,28541971
(1,226:12674358,28541971:14925776,550500,235932
k1,225:16803369,28541971:4129011
(1,221:16803369,28541971:0,550500,235932
[1,221:16803369,28541971:0,550500,235932
(1,28:16803369,28541971:0,550500,235932
r1,225:16803369,28541971:0,786432,235932
)
]
)
$1,226:16803369,28541971
x1,226:17214935,28541971
(1,226:17214935,28653710:1068261,342425,3984
x1,226:17479412,28653710
x1,226:17932160,28653710
x1,226:18240467,28653710
)
g1,226:18395332,28541971
x1,226:18829180,28541971
g1,226:18941316,28541971
x1,226:19375164,28541971
g1,226:19439242,28541971
(1,226:19439242,28541971:4031882,531499,192023
(1,226:19439242,28034588:233936,24116,699406
x1,226:19673178,28034588
)
x1,226:20135862,28541971
(1,226:20135862,28653710:317167,342425,3984
x1,226:20400339,28653710
)
x1,226:20612937,28541971
g1,226:20677015,28541971
x1,226:21095134,28541971
(1,226:21095134,28640274:475555,226623,3984
x1,226:21527960,28640274
)
x1,226:21730597,28541971
g1,226:21810694,28541971
x1,226:22353332,28541971
g1,226:22433429,28541971
x1,226:22896113,28541971
(1,226:22896113,28640274:341075,226623,3984
x1,226:23194459,28640274
)
(1,226:23237188,28034588:233936,24116,699406
x1,226:23471124,28034588
)
)
$1,226:23471124,28541971
k1,226:27600134,28541971:4129010
)
g1,226:27600134,28541971
)
]
)
(1,227:31265262,26990084:1061680,426639,76349
(1,227:31265262,26990084:1061680,426639,76349
x1,227:32115917,26990084
x1,227:32326942,26990084
)
)
)
(1,230:7947550,29974394:24379392,449576,148438
h1,229:7947550,29974394:655360,0,0
x1,229:8968600,29974394
x1,229:9258267,29974394
x1,229:9937875,29974394
k1,229:10119268,29974394:181393
x1,229:12084688,29974394
k1,229:12266081,29974394:181393
x1,229:13148849,29974394
k1,229:13330241,29974394:181392
x1,229:14353913,29974394
x1,229:14639649,29974394
x1,229:14946357,29974394
x1,229:16185642,29974394
x1,229:17959700,29974394
k1,229:18141093,29974394:181393
x1,229:18582804,29974394
x1,229:18892133,29974394
x1,229:19428217,29974394
x1,229:21015497,29974394
k1,229:21196890,29974394:181393
x1,229:21979389,29974394
x1,229:22155025,29974394
x1,229:22750091,29974394
x1,229:23059420,29974394
x1,229:24163045,29974394
k1,229:24344438,29974394:181393
x1,229:25783606,29974394
x1,229:26754849,29974394
k1,229:26936241,29974394:181392
x1,229:27710875,29974394
k1,229:27892268,29974394:181393
x1,229:28965746,29974394
x1,229:29680088,29974394
x1,229:29914706,29974394
x1,229:30392462,29974394
k1,229:30573855,29974394:181393
x1,229:31220695,29974394
x1,229:31530680,29974394
x1,229:32090357,29974394
x1,229:32326942,29974394
k1,230:32326942,29974394:0
)
(1,230:7947550,30760826:24379392,449576,148438
x1,230:9574807,30760826
k1,229:9696211,30760826:121404
x1,229:10873236,30760826
k1,229:10994640,30760826:121404
x1,229:11665073,30760826
k1,229:11786477,30760826:121404
x1,229:12096462,30760826
x1,229:13089332,30760826
x1,229:13776147,30760826
x1,229:14082855,30760826
x1,229:14230966,30760826
k1,229:14355221,30760826:124255
x1,229:15543386,30760826
k1,229:15664790,30760826:121404
x1,229:16841815,30760826
k1,229:16963219,30760826:121404
x1,229:17891208,30760826
k1,229:18012613,30760826:121405
x1,229:18683046,30760826
k1,229:18804450,30760826:121404
x1,229:19418522,30760826
x1,229:20083056,30760826
x1,229:20317674,30760826
x1,229:21617905,30760826
k1,229:21739309,30760826:121404
x1,229:22521808,30760826
x1,229:22697444,30760826
x1,229:23292510,30760826
x1,229:24479365,30760826
k1,229:24600769,30760826:121404
x1,229:24968425,30760826
k1,229:25089829,30760826:121404
x1,229:25972597,30760826
k1,229:26094001,30760826:121404
x1,229:27388991,30760826
x1,229:28294042,30760826
k1,229:28415446,30760826:121404
x1,229:28955462,30760826
k1,229:29076866,30760826:121404
x1,229:30367924,30760826
k1,229:30489314,30760826:121390
x1,229:32326942,30760826
k1,229:32326942,30760826:0
)
(1,230:7947550,31547258:24379392,449576,148438
x1,230:8496086,31547258
x1,230:9029548,31547258
x1,230:10478547,31547258
k1,229:10645706,31547258:167159
x1,229:11228320,31547258
k1,229:11395480,31547258:167160
x1,229:11763136,31547258
k1,229:11930295,31547258:167159
x1,229:13308516,31547258
k1,229:13475644,31547258:167128
x1,229:13914079,31547258
k1,229:14081238,31547258:167159
x1,229:14805410,31547258
x1,229:16145618,31547258
k1,229:16312777,31547258:167159
x1,229:16488413,31547258
x1,229:16957649,31547258
x1,229:17569098,31547258
x1,229:17934788,31547258
x1,229:18653061,31547258
x1,229:18776924,31547258
k1,229:19039852,31547258:262928
x1,229:20499991,31547258
k1,229:20667151,31547258:167160
x1,229:21215687,31547258
x1,229:21829759,31547258
x1,229:22494293,31547258
x1,229:22728911,31547258
x1,229:23642481,31547258
k1,229:23809640,31547258:167159
x1,229:24248075,31547258
k1,229:24415234,31547258:167159
x1,229:25306522,31547258
x1,229:27159223,31547258
k1,229:27326383,31547258:167160
x1,229:27881472,31547258
k1,229:28048631,31547258:167159
x1,229:28598477,31547258
x1,229:29351484,31547258
k1,229:29518643,31547258:167159
x1,229:30554766,31547258
k1,229:30721926,31547258:167160
x1,229:31277015,31547258
k1,229:31444174,31547258:167159
x1,229:32326942,31547258
k1,229:32326942,31547258:0
)
(1,230:7947550,32333690:24379392,449576,148438
x1,230:8886024,32333690
k1,229:9026317,32333690:140293
x1,229:9566333,32333690
k1,229:9706626,32333690:140293
x1,229:10394754,32333690
k1,229:10535047,32333690:140293
x1,229:10845032,32333690
x1,229:11137977,32333690
x1,229:12002396,32333690
x1,229:12744917,32333690
x1,229:13051625,32333690
k1,229:13191918,32333690:140293
x1,229:14486908,32333690
x1,229:15391959,32333690
k1,229:15532252,32333690:140293
x1,229:16072268,32333690
k1,229:16212561,32333690:140293
x1,229:16516647,32333690
x1,229:17062561,32333690
x1,229:17242784,32333690
x1,229:18659671,32333690
k1,229:18799964,32333690:140293
x1,229:19526102,32333690
x1,229:19760720,32333690
x1,229:20627104,32333690
k1,229:20767396,32333690:140292
x1,229:21650164,32333690
k1,229:21790457,32333690:140293
x1,229:22504799,32333690
x1,229:22887528,32333690
x1,229:24224461,32333690
x1,229:25487994,32333690
k1,229:25670323,32333690:182329
x1,229:26044533,32333690
x1,229:26332235,32333690
k1,229:26472528,32333690:140293
x1,229:26820524,32333690
x1,229:27106260,32333690
x1,229:27412968,32333690
x1,229:27647586,32333690
x1,229:29149014,32333690
k1,229:29289307,32333690:140293
x1,229:30582330,32333690
k1,229:30722623,32333690:140293
x1,229:31317689,32333690
x1,229:32090357,32333690
x1,229:32326942,32333690
k1,230:32326942,32333690:0
)
(1,230:7947550,33120122:24379392,449576,135003
x1,230:9500752,33120122
x1,230:9654761,33120122
k1,229:9819798,33120122:165037
x1,229:10135026,33120122
k1,229:10294187,33120122:159161
x1,229:11624568,33120122
x1,229:12614815,33120122
x1,229:13727613,33120122
x1,229:14034321,33120122
k1,229:14193482,33120122:159161
x1,229:14581455,33120122
x1,229:15595295,33120122
k1,229:15754432,33120122:159137
x1,229:17034348,33120122
x1,229:18259213,33120122
k1,229:18418350,33120122:159137
x1,229:19405322,33120122
k1,229:19564483,33120122:159161
x1,229:20234916,33120122
k1,229:20394077,33120122:159161
x1,229:21413817,33120122
x1,229:22212700,33120122
x1,229:22757303,33120122
x1,229:23575847,33120122
k1,229:23814781,33120122:238934
x1,229:24176539,33120122
x1,229:24872531,33120122
x1,229:25238221,33120122
x1,229:25956494,33120122
k1,229:26115655,33120122:159161
x1,229:27184546,33120122
x1,229:28198386,33120122
k1,229:28357523,33120122:159137
x1,229:29539135,33120122
x1,229:31382660,33120122
k1,229:31541821,33120122:159161
x1,229:32090357,33120122
x1,229:32326942,33120122
k1,230:32326942,33120122:0
)
(1,230:7947550,33906554:24379392,449576,148438
x1,230:9450944,33906554
k1,229:9559906,33906554:108962
x1,229:10426291,33906554
x1,229:11309060,33906554
x1,229:12457904,33906554
k1,229:12566866,33906554:108962
x1,229:12801484,33906554
x1,229:13110813,33906554
x1,229:14130552,33906554
k1,229:14239514,33906554:108962
x1,229:14915190,33906554
x1,229:15616424,33906554
k1,229:15725386,33906554:108962
x1,229:16954840,33906554
x1,229:18058465,33906554
k1,229:18167427,33906554:108962
x1,229:18715963,33906554
x1,229:19233041,33906554
x1,229:20182001,33906554
x1,229:20665656,33906554
x1,229:21769281,33906554
k1,229:21878243,33906554:108962
x1,229:22926819,33906554
k1,229:23035781,33906554:108962
x1,229:23351009,33906554
x1,229:23585627,33906554
x1,229:23972943,33906554
x1,229:24340599,33906554
x1,229:25298734,33906554
k1,229:25407696,33906554:108962
x1,229:26456271,33906554
x1,229:26690889,33906554
x1,229:27168645,33906554
k1,229:27277607,33906554:108962
x1,229:28167585,33906554
x1,229:29213538,33906554
x1,229:29788288,33906554
x1,229:29936399,33906554
k1,229:30095927,33906554:159528
x1,229:30306297,33906554
x1,229:30668055,33906554
k1,229:30777017,33906554:108962
x1,229:32326942,33906554
k1,229:32326942,33906554:0
)
(1,230:7947550,34692986:24379392,449576,135003
x1,230:9397205,34692986
x1,229:9551214,34692986
k1,229:9711107,34692986:159893
x1,229:10779998,34692986
x1,229:11793838,34692986
k1,229:11948865,34692986:155027
x1,229:13130477,34692986
x1,229:14974002,34692986
k1,229:15129049,34692986:155047
x1,229:15678895,34692986
x1,229:15977083,34692986
k1,229:16132129,34692986:155046
x1,229:17741037,34692986
k1,229:17896084,34692986:155047
x1,229:18616980,34692986
k1,229:18772026,34692986:155046
x1,229:20063084,34692986
k1,229:20218111,34692986:155027
x1,229:22055739,34692986
x1,229:22203850,34692986
k1,229:22430439,34692986:226589
x1,229:23075968,34692986
k1,229:23231015,34692986:155047
x1,229:24758658,34692986
x1,229:25827549,34692986
x1,229:26841389,34692986
k1,229:26996416,34692986:155027
x1,229:27434851,34692986
k1,229:27589897,34692986:155046
x1,229:27905125,34692986
k1,229:28060172,34692986:155047
x1,229:29494754,34692986
x1,229:30089820,34692986
x1,229:30574129,34692986
x1,229:31253737,34692986
k1,229:31408783,34692986:155046
x1,229:32090357,34692986
x1,229:32326942,34692986
k1,230:32326942,34692986:0
)
(1,230:7947550,35479418:24379392,449576,135003
x1,230:8548514,35479418
x1,230:10032248,35479418
k1,229:10192882,35479418:160634
x1,229:10575611,35479418
k1,229:10731250,35479418:155639
x1,229:11414135,35479418
x1,229:12831022,35479418
k1,229:12986661,35479418:155639
x1,229:13869429,35479418
k1,229:14025068,35479418:155639
x1,229:14807567,35479418
x1,229:14983203,35479418
x1,229:15578269,35479418
x1,229:15887598,35479418
x1,229:16991223,35479418
k1,229:17146862,35479418:155639
x1,229:17686878,35479418
k1,229:17842517,35479418:155639
x1,229:18769850,35479418
x1,229:19641478,35479418
x1,229:20383999,35479418
x1,229:20690707,35479418
k1,229:20846346,35479418:155639
x1,229:21919824,35479418
x1,229:22634166,35479418
x1,229:22868784,35479418
x1,229:23346540,35479418
k1,229:23502178,35479418:155638
x1,229:24149018,35479418
x1,229:24459003,35479418
x1,229:25018680,35479418
x1,229:26645937,35479418
x1,229:26794048,35479418
k1,229:27022415,35479418:228367
x1,229:28306918,35479418
x1,229:28605106,35479418
x1,229:29379740,35479418
x1,229:29677928,35479418
x1,229:29826039,35479418
k1,229:29986673,35479418:160634
x1,229:30369402,35479418
k1,229:30525041,35479418:155639
x1,229:31500870,35479418
k1,229:31656509,35479418:155639
x1,229:32326942,35479418
k1,229:32326942,35479418:0
)
(1,230:7947550,36265850:24379392,449576,135003
x1,230:8550480,36265850
x1,230:9422108,36265850
x1,230:10641077,36265850
g1,229:10776736,36265850
x1,229:11325272,36265850
g1,229:11460931,36265850
x1,229:11776159,36265850
g1,229:11911818,36265850
x1,229:12469528,36265850
x1,229:13276929,36265850
x1,229:13575117,36265850
g1,229:13710776,36265850
x1,229:14756729,36265850
x1,229:15228588,36265850
g1,229:15364247,36265850
x1,229:16973155,36265850
g1,229:17108814,36265850
x1,229:17829710,36265850
g1,229:17965369,36265850
x1,229:18848137,36265850
g1,229:18983796,36265850
x1,229:19584760,36265850
x1,229:19928824,36265850
x1,229:21576398,36265850
g1,229:21712057,36265850
x1,229:23239700,36265850
x1,229:23627673,36265850
x1,229:24801421,36265850
k1,230:32326942,36265850:7525521
g1,230:32326942,36265850
)
(1,231:7947550,38710197:24379392,637594,16560
(1,231:7947550,38710197:1647370,617111,16560
g1,231:7947550,38710197
x1,231:9159107,38710197
)
x1,231:14823802,38710197
g1,231:15066113,38710197
x1,231:18020052,38710197
x1,231:19055542,38710197
k1,231:25691242,38710197:6635700
k1,231:32326942,38710197:6635700
)
(1,234:7947550,39929118:24379392,449576,148438
x1,234:8997435,39929118
k1,233:9188687,39929118:191252
x1,233:9789651,39929118
x1,233:11240616,39929118
k1,233:11431868,39929118:191252
x1,233:11819841,39929118
x1,233:12833681,39929118
k1,233:13024877,39929118:191196
x1,233:14307415,39929118
x1,233:15631241,39929118
k1,233:15822493,39929118:191252
x1,233:16260928,39929118
k1,233:16452180,39929118:191252
x1,233:16756266,39929118
x1,233:17297592,39929118
x1,233:17477815,39929118
x1,233:18515904,39929118
k1,233:18707156,39929118:191252
x1,233:20197442,39929118
k1,233:20388694,39929118:191252
x1,233:21407122,39929118
k1,233:21598374,39929118:191252
x1,233:24180489,39929118
x1,233:24334498,39929118
k1,233:24539649,39929118:205151
x1,233:25588225,39929118
k1,233:25779477,39929118:191252
x1,233:26662245,39929118
k1,233:26853497,39929118:191252
x1,233:27088115,39929118
x1,233:28168801,39929118
x1,233:29060090,39929118
k1,233:29251342,39929118:191252
x1,233:29852306,39929118
x1,233:31765955,39929118
x1,233:32326942,39929118
k1,233:32326942,39929118:0
)
(1,234:7947550,40715550:24379392,449576,148438
x1,234:8497396,40715550
x1,233:8795584,40715550
k1,233:8943493,40715550:147909
x1,233:9544457,40715550
x1,233:11665855,40715550
k1,233:11813765,40715550:147910
x1,233:12362301,40715550
k1,233:12510210,40715550:147909
x1,233:13392978,40715550
k1,233:13540887,40715550:147909
x1,233:14765753,40715550
x1,233:16072539,40715550
k1,233:16220448,40715550:147909
x1,233:19447437,40715550
x1,233:19595548,40715550
k1,233:19800726,40715550:205178
x1,233:20150688,40715550
x1,233:21184843,40715550
k1,233:21335815,40715550:150972
x1,233:21651043,40715550
k1,233:21798953,40715550:147910
x1,233:22514605,40715550
x1,233:22959594,40715550
k1,233:23107503,40715550:147909
x1,233:24314019,40715550
k1,233:24461928,40715550:147909
x1,233:25559653,40715550
x1,233:27864552,40715550
k1,233:28012461,40715550:147909
x1,233:28327689,40715550
k1,233:28475599,40715550:147910
x1,233:30924020,40715550
k1,233:31071929,40715550:147909
x1,233:32326942,40715550
k1,234:32326942,40715550:0
)
(1,234:7947550,41501982:24379392,449576,148438
x1,234:11365905,41501982
k1,233:11514621,41501982:148716
x1,233:13740876,41501982
k1,233:13889591,41501982:148715
x1,233:14328026,41501982
k1,233:14476742,41501982:148716
x1,233:14711360,41501982
x1,233:16733798,41501982
x1,233:18440353,41501982
k1,233:18647950,41501982:207597
x1,233:19697835,41501982
k1,233:19846551,41501982:148716
x1,233:21868989,41501982
x1,233:22346745,41501982
k1,233:22495460,41501982:148715
x1,233:23452285,41501982
x1,233:25639219,41501982
k1,233:25787935,41501982:148716
x1,233:26337781,41501982
x1,233:26635969,41501982
k1,233:26784685,41501982:148716
x1,233:28337886,41501982
x1,233:29684649,41501982
k1,233:29836628,41501982:151979
x1,233:30885204,41501982
k1,233:31033920,41501982:148716
x1,233:32326942,41501982
k1,233:32326942,41501982:0
)
(1,234:7947550,42288414:24379392,449576,148438
x1,234:9867097,42288414
k1,233:10037654,42288414:170557
x1,233:10758550,42288414
k1,233:10929107,42288414:170557
x1,233:11811875,42288414
k1,233:11982432,42288414:170557
x1,233:13495656,42288414
x1,233:14409226,42288414
k1,233:14579782,42288414:170556
x1,233:15119798,42288414
k1,233:15290355,42288414:170557
x1,233:16173123,42288414
k1,233:16343680,42288414:170557
x1,233:16578298,42288414
x1,233:18600736,42288414
x1,233:20147383,42288414
k1,233:20317940,42288414:170557
x1,233:21033592,42288414
x1,233:21478581,42288414
k1,233:21649138,42288414:170557
x1,233:22855654,42288414
k1,233:23026211,42288414:170557
x1,233:23464646,42288414
k1,233:23635202,42288414:170556
x1,233:24729652,42288414
k1,233:24900209,42288414:170557
x1,233:27753644,42288414
k1,233:28026765,42288414:273121
x1,233:28353134,42288414
x1,233:31723644,42288414
x1,233:31832433,42288414
k1,233:32011714,42288414:179281
x1,233:32326942,42288414
k1,233:32326942,42288414:0
)
(1,234:7947550,43074846:24379392,449576,148438
x1,234:9202563,43074846
x1,234:12620918,43074846
k1,233:12753346,43074846:132428
x1,233:13478828,43074846
x1,233:14367494,43074846
k1,233:14499922,43074846:132428
x1,233:16143563,43074846
x1,233:17662685,43074846
k1,233:17795114,43074846:132429
x1,233:18137867,43074846
x1,233:18538946,43074846
x1,233:18994421,43074846
k1,233:19126846,43074846:132425
x1,233:19565281,43074846
k1,233:19697709,43074846:132428
x1,233:22060935,43074846
x1,233:22879479,43074846
k1,233:23046829,43074846:167350
x1,233:24096714,43074846
k1,233:24229142,43074846:132428
x1,233:25742366,43074846
x1,233:26655936,43074846
k1,233:26788364,43074846:132428
x1,233:27836940,43074846
k1,233:27969369,43074846:132429
x1,233:28203987,43074846
x1,233:30630782,43074846
k1,233:30763210,43074846:132428
x1,233:31311746,43074846
k1,233:31444174,43074846:132428
x1,233:32326942,43074846
k1,233:32326942,43074846:0
)
(1,234:7947550,43861278:24379392,449576,135003
x1,234:11992427,43861278
k1,233:12111159,43861278:118732
x1,233:13360273,43861278
k1,233:13479006,43861278:118733
x1,233:13713624,43861278
x1,233:15144271,43861278
x1,233:15802907,43861278
k1,233:15921639,43861278:118732
x1,233:16696273,43861278
k1,233:16815005,43861278:118732
x1,233:17697773,43861278
k1,233:17816506,43861278:118733
x1,233:18051124,43861278
x1,233:20073562,43861278
x1,233:21846308,43861278
k1,233:21965040,43861278:118732
x1,233:22505056,43861278
k1,233:22623788,43861278:118732
x1,233:23506556,43861278
k1,233:23625289,43861278:118733
x1,233:25966232,43861278
k1,233:26084964,43861278:118732
x1,233:28755554,43861278
k1,233:28874286,43861278:118732
x1,233:29589938,43861278
x1,233:30034927,43861278
k1,233:30153660,43861278:118733
x1,233:31360176,43861278
k1,233:31478908,43861278:118732
x1,233:32028754,43861278
x1,233:32326942,43861278
k1,233:32326942,43861278:0
)
(1,234:7947550,44647710:24379392,449576,148438
x1,234:10800985,44647710
g1,233:10969412,44647710
x1,233:11179782,44647710
x1,233:11541540,44647710
g1,233:11677199,44647710
x1,233:12688417,44647710
g1,233:12824076,44647710
x1,233:14959237,44647710
g1,233:15094896,44647710
x1,233:16622539,44647710
x1,233:17010512,44647710
x1,233:18024352,44647710
g1,233:18160011,44647710
x1,233:18394629,44647710
x1,233:19959625,44647710
g1,233:20095284,44647710
x1,233:20869918,44647710
g1,233:21005577,44647710
x1,233:21972231,44647710
x1,233:22270419,44647710
g1,233:22406078,44647710
x1,233:23265909,44647710
x1,233:26257625,44647710
g1,233:26393284,44647710
x1,233:26943130,44647710
x1,233:27241318,44647710
g1,233:27376977,44647710
x1,233:27977941,44647710
x1,233:30259247,44647710
k1,234:32326942,44647710:2067695
g1,234:32326942,44647710
)
]
(1,239:7947550,46613790:24379392,0,0
h1,239:7947550,46613790:24379392,0,0
)
]
]
!43821
}6
!10
{7
[1,258:4736286,46613790:27525120,41877504,0
[1,258:7882014,46613790:24379392,41222144,0
[1,258:7882014,6178078:24379392,786432,0
(1,258:7882014,6800670:24379392,1409024,0
(1,258:7882014,6800670:24379392,1409024,0
[1,258:7882014,6800670:24379392,1409024,0
(1,258:7882014,5457182:24379392,65536,0
h1,258:7882014,5457182:0,0,0
(1,258:7882014,5457182:24379392,65536,0
r1,258:32261406,5457182:24379392,65536,0
)
g1,258:32261406,5457182
g1,258:32261406,5457182
)
(1,258:7882014,6276382:24379392,395657,55410
x1,258:8856344,6276382
g1,258:8985220,6276382
x1,258:9609667,6276382
g1,258:9738543,6276382
x1,258:10534811,6276382
k1,258:12002457,6276382:1467646
x1,258:13352210,6276382
g1,258:13481086,6276382
x1,258:15703699,6276382
g1,258:15832575,6276382
x1,258:16862322,6276382
x1,258:17831683,6276382
x1,258:19289131,6276382
g1,258:19418007,6276382
x1,258:20814454,6276382
x1,258:21831729,6276382
g1,258:21960605,6276382
x1,258:22794852,6276382
g1,258:22923728,6276382
x1,258:23624753,6276382
x1,258:27995267,6276382
g1,258:28124143,6276382
x1,258:28523834,6276382
x1,258:29549223,6276382
g1,258:29678099,6276382
x1,258:29861134,6276382
x1,258:30121370,6276382
x1,258:30381606,6276382
k1,258:31926452,6276382:1467645
x1,258:32261406,6276382
)
(1,258:7882014,6800670:24379392,65536,0
h1,258:7882014,6800670:0,0,0
(1,258:7882014,6800670:24379392,65536,0
r1,258:32261406,6800670:24379392,65536,0
)
g1,258:32261406,6800670
g1,258:32261406,6800670
)
]
)
)
]
[1,258:7882014,44647710:24379392,36831232,0
[1,245:7882014,14496581:24379392,6680103,0
[1,245:7882014,14496581:24379392,6680103,0
(1,243:7882014,13316933:24379392,5500455,0
k1,243:12757818,13316933:4875804
h1,242:12757818,13316933:0,0,0
(1,242:12757818,13316933:14627784,5500455,0
(1,242:12757818,13316933:14627811,5500469,0
(1,242:12757818,13316933:14627811,5500469,0
(1,242:12757818,13316933:0,5500469,0
(1,242:12757818,13316933:0,15787622,0
(1,242:12757818,13316933:41985208,15787622,0
)
k1,242:12757818,13316933:-41985208
)
)
g1,242:27385629,13316933
)
)
)
g1,243:27385602,13316933
k1,243:32261406,13316933:4875804
)
(1,243:7882014,13867433:24379392,550500,235932
h1,243:7882014,13867433:0,0,0
g1,243:7882014,13867433
[1,243:7882014,13867433:24379392,550500,235932
(1,243:7882014,13867433:24379392,550500,235932
k1,243:13327084,13867433:5445070
h1,243:13327084,13867433:0,0,0
x1,243:13677046,13867433
x1,243:14760352,13867433
x1,243:15058540,13867433
g1,243:15194199,13867433
x1,243:15673922,13867433
g1,243:15842349,13867433
r1,243:15842349,13867433:0,786432,235932
g1,243:15842349,13867433
x1,243:16192311,13867433
x1,243:16701525,13867433
x1,243:17146514,13867433
g1,243:17282173,13867433
x1,243:19941622,13867433
g1,243:20077281,13867433
x1,243:20851915,13867433
g1,243:20987574,13867433
x1,243:21870342,13867433
g1,243:22006001,13867433
x1,243:24454422,13867433
g1,243:24590081,13867433
x1,243:26816336,13867433
r1,243:26816336,13867433:0,235932,235932
g1,243:26816336,13867433
k1,243:32261406,13867433:5445070
)
]
g1,243:32261406,13867433
g1,243:32261406,13867433
)
]
]
[1,254:7882014,32322557:24379392,16936865,0
[1,254:7882014,32322557:24379392,16936865,0
(1,252:7882014,31142909:24379392,15757217,0
k1,252:11538960,31142909:3656946
h1,251:11538960,31142909:0,0,0
(1,251:11538960,31142909:17065500,15757217,0
(1,251:11538960,31142909:17065551,15757256,0
(1,251:11538960,31142909:17065551,15757256,0
(1,251:11538960,31142909:0,15757256,0
(1,251:11538960,31142909:0,40406446,0
(1,251:11538960,31142909:43761316,40406446,0
)
k1,251:11538960,31142909:-43761316
)
)
g1,251:28604511,31142909
)
)
)
g1,252:28604460,31142909
k1,252:32261406,31142909:3656946
)
(1,252:7882014,31693409:24379392,550500,235932
h1,252:7882014,31693409:0,0,0
g1,252:7882014,31693409
[1,252:7882014,31693409:24379392,550500,235932
(1,252:7882014,31693409:24379392,550500,235932
k1,252:11938052,31693409:4056038
h1,252:11938052,31693409:0,0,0
x1,252:12288014,31693409
x1,252:13371320,31693409
x1,252:13669508,31693409
g1,252:13805167,31693409
x1,252:14284890,31693409
g1,252:14453317,31693409
r1,252:14453317,31693409:0,786432,235932
g1,252:14453317,31693409
x1,252:14923210,31693409
x1,252:15891175,31693409
x1,252:18280614,31693409
g1,252:18416273,31693409
x1,252:21206792,31693409
g1,252:21342451,31693409
x1,252:22117085,31693409
g1,252:22252744,31693409
x1,252:23135512,31693409
g1,252:23271171,31693409
x1,252:25719592,31693409
g1,252:25855251,31693409
x1,252:28081506,31693409
x1,252:28205369,31693409
r1,252:28205369,31693409:0,235932,235932
g1,252:28205369,31693409
k1,252:32261406,31693409:4056037
)
]
g1,252:32261406,31693409
g1,252:32261406,31693409
)
]
]
(1,235:7882014,34391317:24379392,489581,144565
(1,235:7882014,34391317:1264944,473853,12716
g1,235:7882014,34391317
x1,235:8812316,34391317
)
x1,235:10150882,34391317
x1,235:10661544,34391317
g1,235:10847604,34391317
x1,235:12223649,34391317
g1,235:12409709,34391317
x1,235:17095357,34391317
g1,235:17281417,34391317
x1,235:17913220,34391317
g1,235:18099280,34391317
x1,235:18471401,34391317
g1,235:18657461,34391317
x1,235:21483173,34391317
g1,235:21669233,34391317
x1,235:22041354,34391317
x1,235:24229238,34391317
k1,235:28245322,34391317:4016084
k1,235:32261406,34391317:4016084
)
(1,237:7882014,35573153:24379392,466809,137841
(1,237:7882014,35573153:1738328,451813,12124
g1,237:7882014,35573153
x1,237:9301265,35573153
)
x1,237:13130822,35573153
g1,237:13308228,35573153
x1,237:13910645,35573153
g1,237:14088051,35573153
x1,237:15045281,35573153
g1,237:15222687,35573153
x1,237:16499631,35573153
x1,237:17731903,35573153
k1,237:24996655,35573153:7264752
k1,237:32261406,35573153:7264751
)
(1,239:7882014,36732050:24379392,449576,148438
x1,239:8931899,36732050
k1,238:9122994,36732050:191095
x1,238:9357612,36732050
x1,238:9655800,36732050
x1,238:10675540,36732050
x1,238:11380050,36732050
x1,238:12049171,36732050
x1,238:13152796,36732050
k1,238:13343891,36732050:191095
x1,238:13883907,36732050
k1,238:14075002,36732050:191095
x1,238:14957770,36732050
k1,238:15148864,36732050:191094
x1,238:15864516,36732050
x1,238:16309505,36732050
k1,238:16500600,36732050:191095
x1,238:17707116,36732050
k1,238:17898211,36732050:191095
x1,238:18526700,36732050
x1,238:18995936,36732050
x1,238:20439038,36732050
x1,238:21300835,36732050
k1,238:21491930,36732050:191095
x1,238:21807158,36732050
k1,238:21998253,36732050:191095
x1,238:22993088,36732050
x1,238:23837846,36732050
k1,238:24028941,36732050:191095
x1,238:25350145,36732050
x1,238:26255196,36732050
k1,238:26446290,36732050:191094
x1,238:27184880,36732050
x1,238:28089931,36732050
k1,238:28281026,36732050:191095
x1,238:29163794,36732050
k1,238:29354889,36732050:191095
x1,238:29955853,36732050
x1,238:30254041,36732050
x1,238:31050302,36732050
x1,238:32261406,36732050
k1,238:32261406,36732050:0
)
(1,239:7882014,37518482:24379392,449576,148438
x1,239:9468638,37518482
x1,239:10330435,37518482
k1,238:10575207,37518482:244772
x1,238:11479603,37518482
x1,238:12583228,37518482
k1,238:12827999,37518482:244771
x1,238:13266434,37518482
k1,238:13511206,37518482:244772
x1,238:14033527,37518482
x1,238:16350877,37518482
k1,238:16595649,37518482:244772
x1,238:16956097,37518482
x1,238:17246420,37518482
k1,238:17491191,37518482:244771
x1,238:18119680,37518482
x1,238:18981477,37518482
k1,238:19226249,37518482:244772
x1,238:20109017,37518482
k1,238:20353789,37518482:244772
x1,238:20954753,37518482
x1,238:21298817,37518482
x1,238:22946391,37518482
k1,238:23191162,37518482:244771
x1,238:23579135,37518482
x1,238:24592975,37518482
k1,238:24837637,37518482:244662
x1,238:25612271,37518482
k1,238:25857043,37518482:244772
x1,238:26739811,37518482
k1,238:26984582,37518482:244771
x1,238:27288668,37518482
x1,238:27768391,37518482
x1,238:27944027,37518482
x1,238:28619703,37518482
x1,238:29883236,37518482
k1,238:30379001,37518482:495765
x1,238:30761731,37518482
k1,238:31006393,37518482:244662
x1,238:32261406,37518482
k1,239:32261406,37518482:0
)
(1,239:7882014,38304914:24379392,449576,135003
x1,239:11300369,38304914
k1,238:11551470,38304914:251101
x1,238:12765850,38304914
x1,238:14125719,38304914
x1,238:15486899,38304914
x1,238:17095807,38304914
k1,238:17346909,38304914:251102
x1,238:18527210,38304914
k1,238:18778311,38304914:251101
x1,238:19220022,38304914
x1,238:19902251,38304914
x1,238:21230664,38304914
k1,238:21481766,38304914:251102
x1,238:22030302,38304914
x1,238:23233542,38304914
x1,238:23834506,38304914
x1,238:24658292,38304914
x1,238:25672788,38304914
k1,238:25923889,38304914:251101
x1,238:26394437,38304914
x1,238:27715640,38304914
x1,238:27940428,38304914
x1,238:28266797,38304914
x1,238:29696134,38304914
k1,238:29947236,38304914:251102
x1,238:31030544,38304914
x1,238:31571870,38304914
k1,238:31822971,38304914:251101
x1,238:32261406,38304914
k1,238:32261406,38304914:0
)
(1,239:7882014,39091346:24379392,562141,148438
x1,239:8748399,39091346
x1,239:9631168,39091346
x1,239:9918215,39091346
x1,239:10584716,39091346
k1,238:10758586,39091346:173870
x1,238:11533220,39091346
k1,238:11707089,39091346:173869
x1,238:12589857,39091346
k1,238:12763727,39091346:173870
x1,238:13623558,39091346
x1,238:13967622,39091346
x1,238:14328070,39091346
x1,238:16352475,39091346
k1,238:16526344,39091346:173869
x1,238:17698127,39091346
x1,238:18704758,39091346
x1,238:18852869,39091346
$1,238:18918405,39091346
(1,238:18918405,38853451:1447296,324246,64500
x1,238:19078784,38853451
(1,238:19078784,38853451:486120,306813,2489
x1,238:19564904,38853451
)
x1,238:19686434,38853451
(1,238:19686434,38853451:486120,306813,2489
x1,238:20172554,38853451
)
x1,238:20332933,38853451
)
$1,238:20365701,39091346
k1,238:20539571,39091346:173870
x1,238:21589456,39091346
k1,238:21763325,39091346:173869
x1,238:23349949,39091346
x1,238:24211746,39091346
k1,238:24385616,39091346:173870
x1,238:25706820,39091346
x1,238:26611871,39091346
k1,238:26785740,39091346:173869
x1,238:27227451,39091346
x1,238:27536780,39091346
x1,238:27840866,39091346
x1,238:28578800,39091346
k1,238:28752670,39091346:173870
x1,238:29274991,39091346
k1,238:29448860,39091346:173869
x1,238:29768675,39091346
k1,238:29942545,39091346:173870
x1,238:31038961,39091346
k1,238:31212830,39091346:173869
x1,238:32261406,39091346
k1,238:32261406,39091346:0
)
(1,239:7882014,39877778:24379392,449576,148438
x1,239:8269987,39877778
x1,238:10386142,39877778
g1,238:10521801,39877778
x1,238:11816791,39877778
x1,238:12721842,39877778
g1,238:12857501,39877778
x1,238:13295936,39877778
g1,238:13431595,39877778
x1,238:14550948,39877778
g1,238:14686607,39877778
x1,238:15264634,39877778
g1,238:15400293,39877778
x1,238:15744356,39877778
x1,238:16541272,39877778
x1,238:16982983,39877778
x1,238:18169838,39877778
g1,238:18305497,39877778
x1,238:18854033,39877778
g1,238:18989692,39877778
x1,238:19339654,39877778
x1,238:19982560,39877778
g1,238:20150987,39877778
x1,238:20470802,39877778
h1,238:20470802,39877778:0,0,0
x1,238:20630710,39877778
k1,239:32261406,39877778:11630696
g1,239:32261406,39877778
)
(1,248:7882014,40715550:24379392,449576,148438
h1,247:7882014,40715550:655360,0,0
x1,247:9915595,40715550
k1,247:10030080,40715550:114485
x1,247:10468515,40715550
k1,247:10583020,40715550:114505
x1,247:12307270,40715550
x1,247:13853917,40715550
k1,247:13968422,40715550:114505
x1,247:14328870,40715550
x1,247:14619193,40715550
k1,247:14733698,40715550:114505
x1,247:15616466,40715550
k1,247:15730972,40715550:114506
x1,247:16201520,40715550
x1,247:17522723,40715550
x1,247:17747511,40715550
x1,247:18073880,40715550
x1,247:19503217,40715550
k1,247:19617722,40715550:114505
x1,247:20849798,40715550
k1,247:20964283,40715550:114485
x1,247:22047591,40715550
x1,247:22588917,40715550
x1,247:22712780,40715550
k1,247:22831516,40715550:118736
x1,247:23880092,40715550
k1,247:23994597,40715550:114505
x1,247:24877365,40715550
k1,247:24991870,40715550:114505
x1,247:26246883,40715550
x1,247:29665238,40715550
k1,247:29779744,40715550:114506
x1,247:30495396,40715550
x1,247:30940385,40715550
k1,247:31054890,40715550:114505
x1,247:32261406,40715550
k1,247:32261406,40715550:0
)
(1,248:7882014,41501982:24379392,449576,148438
x1,248:8320449,41501982
k1,247:8495183,41501982:174734
x1,247:9827528,41501982
x1,247:10798114,41501982
x1,247:11464615,41501982
k1,247:11639349,41501982:174734
x1,247:13129635,41501982
k1,247:13304369,41501982:174734
x1,247:13860769,41501982
x1,247:15252098,41501982
k1,247:15426832,41501982:174734
x1,247:15868543,41501982
x1,247:18134118,41501982
k1,247:18308853,41501982:174735
x1,247:20806427,41501982
x1,247:20954538,41501982
k1,247:21240190,41501982:285652
x1,247:21622920,41501982
k1,247:21797615,41501982:174695
x1,247:22755096,41501982
x1,247:23728304,41501982
k1,247:23903038,41501982:174734
x1,247:26260366,41501982
x1,247:26576904,41501982
k1,247:26751638,41501982:174734
x1,247:29411087,41501982
k1,247:29585821,41501982:174734
x1,247:30024256,41501982
k1,247:30198990,41501982:174734
x1,247:32261406,41501982
k1,247:32261406,41501982:0
)
(1,248:7882014,42288414:24379392,449576,148438
x1,248:8437103,42288414
k1,247:8572859,42288414:135756
x1,247:9455627,42288414
k1,247:9591382,42288414:135755
x1,247:10706803,42288414
k1,247:10842559,42288414:135756
x1,247:11382575,42288414
k1,247:11518331,42288414:135756
x1,247:12401099,42288414
k1,247:12536854,42288414:135755
x1,247:14763109,42288414
k1,247:14898865,42288414:135756
x1,247:15947441,42288414
k1,247:16083197,42288414:135756
x1,247:17610838,42288414
x1,247:18154785,42288414
x1,247:18471323,42288414
k1,247:18607078,42288414:135755
x1,247:19812938,42288414
x1,247:21908777,42288414
x1,247:22274467,42288414
x1,247:23345978,42288414
x1,247:24214329,42288414
k1,247:24350085,42288414:135756
x1,247:25863308,42288414
k1,247:25999063,42288414:135755
x1,247:28102766,42288414
k1,247:28238522,42288414:135756
x1,247:28676957,42288414
k1,247:28812713,42288414:135756
x1,247:30111635,42288414
k1,247:30247390,42288414:135755
x1,247:30802479,42288414
k1,247:30938235,42288414:135756
x1,247:32261406,42288414
k1,247:32261406,42288414:0
)
(1,248:7882014,43074846:24379392,449576,148438
x1,248:9093772,43074846
k1,247:9230563,43074846:136791
x1,247:10113331,43074846
k1,247:10250122,43074846:136791
x1,247:12698543,43074846
k1,247:12835334,43074846:136791
x1,247:15003263,43074846
k1,247:15175086,43074846:171823
x1,247:15652187,43074846
x1,247:16752534,43074846
k1,247:16889325,43074846:136791
x1,247:17772093,43074846
k1,247:17908884,43074846:136791
x1,247:19000057,43074846
k1,247:19136846,43074846:136789
x1,247:21240549,43074846
x1,247:21388660,43074846
k1,247:21525734,43074846:137074
x1,247:22408502,43074846
k1,247:22545293,43074846:136791
x1,247:23093172,43074846
x1,247:23633843,43074846
k1,247:23770634,43074846:136791
x1,247:25930042,43074846
k1,247:26066833,43074846:136791
x1,247:26615369,43074846
k1,247:26752160,43074846:136791
x1,247:28247690,43074846
x1,247:29893298,43074846
k1,247:30030089,43074846:136791
x1,247:31241847,43074846
k1,247:31378638,43074846:136791
x1,247:32261406,43074846
k1,247:32261406,43074846:0
)
(1,248:7882014,43861278:24379392,544708,148438
x1,248:8482978,43861278
x1,247:9577427,43861278
x1,247:10788531,43861278
k1,247:10910880,43861278:122349
x1,247:12918901,43861278
k1,247:13041251,43861278:122350
x1,247:13589787,43861278
k1,247:13712136,43861278:122349
x1,247:14027364,43861278
k1,247:14149713,43861278:122349
x1,247:14384331,43861278
x1,247:15413899,43861278
k1,247:15536249,43861278:122350
x1,247:17698280,43861278
x1,247:17822143,43861278
k1,247:17986133,43861278:163990
x1,247:19036018,43861278
k1,247:19158368,43861278:122350
x1,247:20407482,43861278
k1,247:20529831,43861278:122349
x1,247:21676054,43861278
k1,247:21798403,43861278:122349
x1,247:22236838,43861278
k1,247:22359188,43861278:122350
x1,247:23690222,43861278
k1,247:23812571,43861278:122349
x1,247:24334892,43861278
k1,247:24457241,43861278:122349
$1,247:24457241,43861278
x1,247:24777056,43861278
k1,247:24824620,43861278:47564
x1,247:25258468,43861278
k1,247:25306031,43861278:47563
x1,247:25945661,43861278
(1,247:25945661,43623383:605552,306813,0
x1,247:26518445,43623383
)
$1,247:26551213,43861278
k1,247:26673562,43861278:122349
x1,247:28889333,43861278
k1,247:29011683,43861278:122350
x1,247:30060259,43861278
k1,247:30182608,43861278:122349
x1,247:32261406,43861278
k1,247:32261406,43861278:0
)
(1,248:7882014,44647710:24379392,449576,148438
x1,248:9100326,44647710
x1,247:9708499,44647710
g1,247:9844158,44647710
x1,247:10384174,44647710
g1,247:10519833,44647710
x1,247:10946471,44647710
x1,247:13082287,44647710
g1,247:13217946,44647710
x1,247:15070646,44647710
g1,247:15206305,44647710
x1,247:15756151,44647710
x1,247:16054339,44647710
g1,247:16189998,44647710
x1,247:17488920,44647710
g1,247:17624579,44647710
x1,247:18399213,44647710
g1,247:18534872,44647710
x1,247:20761127,44647710
g1,247:20896786,44647710
x1,247:23075200,44647710
x1,247:23229209,44647710
g1,247:23364868,44647710
x1,247:23942895,44647710
g1,247:24078554,44647710
x1,247:24679518,44647710
x1,247:26800916,44647710
g1,247:26936575,44647710
x1,247:27485111,44647710
g1,247:27620770,44647710
x1,247:27970732,44647710
x1,247:28613638,44647710
g1,247:28782065,44647710
x1,247:29101880,44647710
h1,247:29101880,44647710:0,0,0
x1,247:29261788,44647710
k1,248:32261406,44647710:2999618
g1,248:32261406,44647710
)
]
(1,258:7882014,46613790:24379392,0,0
h1,258:7882014,46613790:24379392,0,0
)
]
]
!17265
}7
!10
{8
[1,363:4736286,46613790:27590656,41877504,0
[1,363:7947550,46613790:24379392,41222144,0
[1,363:7947550,6178078:24379392,786432,0
(1,363:7947550,6800670:24379392,1409024,0
(1,363:7947550,6800670:24379392,1409024,0
[1,363:7947550,6800670:24379392,1409024,0
(1,363:7947550,5457182:24379392,65536,0
h1,363:7947550,5457182:0,0,0
(1,363:7947550,5457182:24379392,65536,0
r1,363:32326942,5457182:24379392,65536,0
)
g1,363:32326942,5457182
g1,363:32326942,5457182
)
(1,363:7947550,6276382:24379392,395657,4046
x1,363:8282504,6276382
k1,363:32326942,6276382:24044438
)
(1,363:7947550,6276382:24379392,395657,68796
(1,363:7947550,6276382:24379392,395657,68796
k1,363:16323621,6276382:8376071
x1,363:17415634,6276382
g1,363:17544510,6276382
x1,363:18574257,6276382
x1,363:19653817,6276382
x1,363:21488556,6276382
g1,363:21617432,6276382
x1,363:23950872,6276382
k1,363:32326942,6276382:8376070
)
)
(1,363:7947550,6800670:24379392,65536,0
h1,363:7947550,6800670:0,0,0
(1,363:7947550,6800670:24379392,65536,0
r1,363:32326942,6800670:24379392,65536,0
)
g1,363:32326942,6800670
g1,363:32326942,6800670
)
]
)
)
]
[1,363:7947550,44647710:24379392,36831232,0
(1,256:7947550,8471838:24379392,466809,12124
(1,256:7947550,8471838:1738328,451813,12124
g1,256:7947550,8471838
x1,256:9366801,8471838
)
x1,256:14366094,8471838
g1,256:14543500,8471838
x1,256:15145917,8471838
g1,256:15323323,8471838
x1,256:16280553,8471838
g1,256:16457959,8471838
x1,256:17237783,8471838
x1,256:17724693,8471838
g1,256:17902099,8471838
x1,256:19214142,8471838
k1,256:25770542,8471838:6556400
k1,256:32326942,8471838:6556400
)
(1,258:7947550,9579396:24379392,449576,148438
x1,258:8297512,9579396
x1,257:8520333,9579396
x1,257:9420797,9579396
k1,257:9624794,9579396:203997
x1,257:11003015,9579396
k1,257:11206943,9579396:203928
x1,257:12876142,9579396
k1,257:13080139,9579396:203997
x1,257:13518574,9579396
k1,257:13722571,9579396:203997
x1,257:14742311,9579396
x1,257:15446821,9579396
x1,257:16993468,9579396
k1,257:17197465,9579396:203997
x1,257:17972099,9579396
k1,257:18176096,9579396:203997
x1,257:20035349,9579396
x1,257:22251120,9579396
x1,257:22405129,9579396
k1,257:22626210,9579396:221081
x1,257:23826171,9579396
k1,257:24030168,9579396:203997
x1,257:25049908,9579396
x1,257:25353994,9579396
x1,257:25895320,9579396
x1,257:26875082,9579396
k1,257:27079079,9579396:203997
x1,257:27769827,9579396
x1,257:28521523,9579396
k1,257:28725520,9579396:203997
x1,257:29926793,9579396
k1,257:30147874,9579396:221081
x1,257:32326942,9579396
k1,258:32326942,9579396:0
)
(1,258:7947550,10365828:24379392,449576,135003
x1,258:10163321,10365828
k1,257:10365137,10365828:201816
x1,257:10905153,10365828
k1,257:11106969,10365828:201816
x1,257:12485190,10365828
k1,257:12686939,10365828:201749
x1,257:13125374,10365828
k1,257:13327190,10365828:201816
x1,257:14626112,10365828
k1,257:14827928,10365828:201816
x1,257:15383017,10365828
k1,257:15584832,10365828:201815
x1,257:16604572,10365828
x1,257:17309082,10365828
x1,257:18185296,10365828
k1,257:18387112,10365828:201816
x1,257:19269880,10365828
k1,257:19471696,10365828:201816
x1,257:20788969,10365828
x1,257:21972547,10365828
k1,257:22174363,10365828:201816
x1,257:23045991,10365828
x1,257:23487702,10365828
x1,257:24120778,10365828
k1,257:24487676,10365828:366898
x1,257:25537561,10365828
k1,257:25739376,10365828:201815
x1,257:27056649,10365828
x1,257:28240227,10365828
k1,257:28442043,10365828:201816
x1,257:29313671,10365828
x1,257:29755382,10365828
x1,257:30228550,10365828
k1,257:30430366,10365828:201816
x1,257:30868801,10365828
k1,257:31070617,10365828:201816
x1,257:32090357,10365828
x1,257:32326942,10365828
k1,258:32326942,10365828:0
)
(1,258:7947550,11152260:24379392,449576,148438
x1,258:8652060,11152260
x1,258:10198707,11152260
k1,257:10401676,11152260:202969
x1,257:10762124,11152260
x1,257:11052447,11152260
k1,257:11255417,11152260:202970
x1,257:12070684,11152260
x1,257:13055033,11152260
x1,257:13916830,11152260
k1,257:14119799,11152260:202969
x1,257:15498020,11152260
k1,257:15700921,11152260:202901
x1,257:15935539,11152260
x1,257:16233727,11152260
x1,257:17500535,11152260
k1,257:17703504,11152260:202969
x1,257:18225825,11152260
k1,257:18428795,11152260:202970
x1,257:19784733,11152260
x1,257:22000504,11152260
k1,257:22203473,11152260:202969
x1,257:22752009,11152260
x1,257:23269087,11152260
x1,257:23503705,11152260
x1,257:23818932,11152260
x1,257:24458563,11152260
k1,257:24678360,11152260:219797
x1,257:25233449,11152260
x1,257:25924197,11152260
k1,257:26127166,11152260:202969
x1,257:26667182,11152260
k1,257:26870151,11152260:202969
x1,257:28309319,11152260
k1,257:28512289,11152260:202970
x1,257:29829562,11152260
x1,257:31275939,11152260
k1,257:31478908,11152260:202969
x1,257:32028754,11152260
x1,257:32326942,11152260
k1,257:32326942,11152260:0
)
(1,258:7947550,11938692:24379392,449576,12123
x1,258:9246472,11938692
k1,257:9436494,11938692:190022
x1,257:10211128,11938692
k1,257:10401150,11938692:190022
x1,257:10789123,11938692
x1,257:11962871,11938692
k1,257:12152893,11938692:190022
x1,257:12535623,11938692
k1,257:12725590,11938692:189967
x1,257:13280679,11938692
x1,257:13971427,11938692
k1,257:14161449,11938692:190022
x1,257:14701465,11938692
k1,257:14891487,11938692:190022
x1,257:15211302,11938692
k1,257:15401324,11938692:190022
x1,257:16692382,11938692
k1,257:16882349,11938692:189967
x1,257:18719977,11938692
k1,257:18909999,11938692:190022
x1,257:19459845,11938692
x1,257:19758033,11938692
k1,257:19948055,11938692:190022
x1,257:20967795,11938692
x1,257:21672305,11938692
x1,257:23218952,11938692
k1,257:23408973,11938692:190021
x1,257:24203923,11938692
k1,257:24393945,11938692:190022
x1,257:25572282,11938692
x1,257:25696145,11938692
k1,257:25886167,11938692:190022
x1,257:27508836,11938692
k1,257:27698858,11938692:190022
x1,257:28018673,11938692
k1,257:28208695,11938692:190022
x1,257:30046323,11938692
k1,257:30236345,11938692:190022
x1,257:31256085,11938692
x1,257:32326942,11938692
k1,257:32326942,11938692:0
)
(1,258:7947550,12725124:24379392,449576,148438
x1,258:9572185,12725124
k1,257:9733751,12725124:161566
x1,257:10273767,12725124
k1,257:10435334,12725124:161567
x1,257:11318102,12725124
k1,257:11479668,12725124:161566
x1,257:12034757,12725124
x1,257:12725505,12725124
k1,257:12887072,12725124:161567
x1,257:13569957,12725124
x1,257:14114560,12725124
x1,257:14729286,12725124
k1,257:14890852,12725124:161566
x1,257:15430868,12725124
k1,257:15592435,12725124:161567
x1,257:16475203,12725124
k1,257:16636769,12725124:161566
x1,257:17352421,12725124
x1,257:17797410,12725124
k1,257:17958977,12725124:161567
x1,257:19325401,12725124
k1,257:19571550,12725124:246149
x1,257:21194219,12725124
k1,257:21355786,12725124:161567
x1,257:21675601,12725124
k1,257:21837167,12725124:161566
x1,257:23128225,12725124
k1,257:23289766,12725124:161541
x1,257:25127394,12725124
k1,257:25288960,12725124:161566
x1,257:26337536,12725124
k1,257:26499103,12725124:161567
x1,257:27381871,12725124
k1,257:27543437,12725124:161566
x1,257:27858665,12725124
x1,257:28162751,12725124
x1,257:28469459,12725124
x1,257:28704077,12725124
x1,257:29636652,12725124
k1,257:29798219,12725124:161567
x1,257:30513871,12725124
x1,257:30958860,12725124
k1,257:31120426,12725124:161566
x1,257:32326942,12725124
k1,257:32326942,12725124:0
)
(1,258:7947550,13511556:24379392,449576,148438
x1,258:8497396,13511556
x1,257:8795584,13511556
k1,257:8931638,13511556:136054
x1,257:9602071,13511556
x1,257:11320423,13511556
k1,257:11456477,13511556:136054
x1,257:12005013,13511556
k1,257:12141068,13511556:136055
x1,257:12491030,13511556
x1,257:13133936,13511556
k1,257:13303548,13511556:169612
x1,257:13623363,13511556
h1,257:13623363,13511556:0,0,0
k1,257:13759418,13511556:136055
x1,257:14807994,13511556
k1,257:14944048,13511556:136054
x1,257:15826816,13511556
k1,257:15962870,13511556:136054
x1,257:16645755,13511556
x1,257:17190358,13511556
x1,257:17805084,13511556
k1,257:17941138,13511556:136054
x1,257:18175756,13511556
x1,257:18485085,13511556
x1,257:19215810,13511556
k1,257:19351864,13511556:136054
x1,257:19900400,13511556
k1,257:20036455,13511556:136055
x1,257:20788151,13511556
x1,257:21611937,13511556
k1,257:21747991,13511556:136054
x1,257:22288007,13511556
k1,257:22424061,13511556:136054
x1,257:23715119,13511556
k1,257:23851173,13511556:136054
x1,257:25688801,13511556
k1,257:25824855,13511556:136054
x1,257:27123777,13511556
k1,257:27259831,13511556:136054
x1,257:27809677,13511556
x1,257:28107865,13511556
k1,257:28243920,13511556:136055
x1,257:29220405,13511556
x1,257:30038294,13511556
k1,257:30174348,13511556:136054
x1,257:30722884,13511556
k1,257:30858938,13511556:136054
x1,257:31233148,13511556
x1,257:31488082,13511556
x1,257:32326942,13511556
k1,257:32326942,13511556:0
)
(1,258:7947550,14297988:24379392,403701,3276
x1,258:8267365,14297988
h1,257:8267365,14297988:0,0,0
x1,257:8427273,14297988
k1,258:32326941,14297988:23899668
g1,258:32326941,14297988
)
[1,271:7947550,18821635:24379392,3856845,0
[1,271:7947550,18821635:24379392,3856845,0
(1,261:7947550,15908506:24379392,550500,235932
h1,261:7947550,15908506:0,0,0
g1,261:7947550,15908506
[1,261:7947550,15908506:24379392,550500,235932
(1,261:7947550,15908506:24379392,550500,235932
k1,261:10728915,15908506:2781365
h1,261:10728915,15908506:0,0,0
x1,261:11103125,15908506
x1,261:12196919,15908506
g1,261:12332578,15908506
x1,261:12812301,15908506
g1,261:12980728,15908506
r1,261:12980728,15908506:0,786432,235932
g1,261:12980728,15908506
x1,261:13346418,15908506
x1,261:14261299,15908506
x1,261:14876025,15908506
g1,261:15011684,15908506
x1,261:15246302,15908506
x1,261:16286356,15908506
g1,261:16422015,15908506
x1,261:16962031,15908506
g1,261:17097690,15908506
x1,261:17980458,15908506
g1,261:18116117,15908506
x1,261:20564538,15908506
g1,261:20700197,15908506
x1,261:22926452,15908506
g1,261:23062111,15908506
x1,261:23610647,15908506
g1,261:23746306,15908506
x1,261:24498002,15908506
x1,261:25321788,15908506
g1,261:25457447,15908506
x1,261:25997463,15908506
g1,261:26133122,15908506
x1,261:27424180,15908506
g1,261:27559839,15908506
x1,261:29397467,15908506
x1,261:29545578,15908506
r1,261:29545578,15908506:0,235932,235932
g1,261:29545578,15908506
k1,261:32326942,15908506:2781364
)
]
g1,261:32326942,15908506
g1,261:32326942,15908506
)
(1,268:7947550,17297216:24379392,1152778,813302
k1,268:9358223,17297216:1410673
h1,264:9358223,17297216:0,0,0
(1,267:9358223,17297216:21558046,1152778,813302
$1,267:9358223,17297216
[1,267:9358223,17297216:21558046,1152778,813302
(1,265:9358223,16694938:21558046,550500,629148
g1,265:9358223,16694938
(1,265:9358223,16694938:5597422,550500,629148
r1,265:9358223,16694938:0,786432,235932
g1,265:9358223,16694938
g1,265:9358224,16694938
x1,265:9803869,16694938
x1,265:10138102,16694938
x1,265:10301286,16694938
g1,265:10457916,16694938
x1,265:11016937,16694938
g1,265:11143421,16694938
x1,265:12467247,16694938
g1,265:12593731,16694938
x1,265:14464125,16694938
g1,265:14464125,16694938
g1,265:14955645,16694938
)
g1,265:14955645,16694938
(1,265:14955645,16694938:2742024,550500,629148
g1,265:15447165,16694938
k1,265:16157902,16694938:710737
g1,265:16157903,16694938
x1,265:16495413,16694938
k1,265:17206149,16694938:710736
g1,265:17697669,16694938
)
g1,265:17697669,16694938
(1,265:17697669,16694938:2742024,550500,629148
g1,265:18189189,16694938
k1,265:18899926,16694938:710737
g1,265:18899927,16694938
x1,265:19237437,16694938
k1,265:19948173,16694938:710736
g1,265:20439693,16694938
)
g1,265:20439693,16694938
(1,265:20439693,16694938:2742024,550500,629148
g1,265:20931213,16694938
k1,265:21641950,16694938:710737
g1,265:21641951,16694938
x1,265:21979461,16694938
k1,265:22690197,16694938:710736
g1,265:23181717,16694938
)
g1,265:23181717,16694938
(1,265:23181717,16694938:2742024,550500,629148
g1,265:23673237,16694938
k1,265:24383974,16694938:710737
g1,265:24383975,16694938
x1,265:24721485,16694938
k1,265:25432221,16694938:710736
g1,265:25923741,16694938
)
g1,265:25923741,16694938
(1,265:25923741,16694938:2742024,550500,629148
g1,265:26415261,16694938
k1,265:26957243,16694938:541982
g1,265:26957244,16694938
x1,265:27632264,16694938
k1,265:28174245,16694938:541981
g1,265:28665765,16694938
)
g1,265:28665765,16694938
(1,265:28665765,16694938:2250504,550500,629148
g1,265:29157285,16694938
k1,265:29699267,16694938:541982
g1,265:29699268,16694938
x1,265:30374288,16694938
r1,265:30374288,16694938:0,1179648,629148
k1,265:30916269,16694938:541981
)
g1,265:30916269,16694938
)
(1,267:9358223,17874586:21558046,550500,235932
g1,266:9358223,17874586
(1,266:9358223,17874586:5597422,550500,235932
r1,266:9358223,17874586:0,786432,235932
k1,266:9567100,17874586:208877
g1,266:9567101,17874586
x1,266:9946554,17874586
x1,266:10906654,17874586
x1,266:11231056,17874586
x1,266:11558735,17874586
g1,266:11685219,17874586
x1,266:13044434,17874586
$1,266:13044434,17874586
(1,266:13044434,17636691:272341,229611,2489
h1,266:13044434,17636691:0,0,0
x1,266:13284007,17636691
)
$1,266:13316775,17874586
x1,266:14255248,17874586
k1,266:14464125,17874586:208877
g1,266:14955645,17874586
)
g1,266:14955645,17874586
(1,266:14955645,17874586:2742024,550500,235932
g1,266:15447165,17874586
g1,266:15447165,17874586
g1,266:15447166,17874586
x1,266:17206149,17874586
g1,266:17206149,17874586
g1,266:17697669,17874586
)
g1,266:17697669,17874586
(1,266:17697669,17874586:2742024,550500,235932
g1,266:18189189,17874586
g1,266:18189189,17874586
g1,266:18189190,17874586
x1,266:19948173,17874586
g1,266:19948173,17874586
g1,266:20439693,17874586
)
g1,266:20439693,17874586
(1,266:20439693,17874586:2742024,550500,235932
g1,266:20931213,17874586
g1,266:20931213,17874586
g1,266:20931214,17874586
x1,266:22690197,17874586
g1,266:22690197,17874586
g1,266:23181717,17874586
)
g1,266:23181717,17874586
(1,266:23181717,17874586:2742024,550500,235932
g1,266:23673237,17874586
g1,266:23673237,17874586
g1,266:23673238,17874586
x1,266:25432221,17874586
g1,266:25432221,17874586
g1,266:25923741,17874586
)
g1,266:25923741,17874586
(1,266:25923741,17874586:2742024,550500,235932
g1,266:26415261,17874586
g1,266:26415261,17874586
g1,266:26415262,17874586
x1,266:28174245,17874586
g1,266:28174245,17874586
g1,266:28665765,17874586
)
g1,266:28665765,17874586
(1,267:28665765,17874586:2250504,550500,235932
g1,266:29157285,17874586
g1,266:29157285,17874586
g1,266:29157286,17874586
x1,266:30916269,17874586
g1,267:30916269,17874586
)
g1,267:30916269,17874586
)
]
$1,267:30916269,17297216
)
g1,268:30916269,17297216
k1,268:32326942,17297216:1410673
)
(1,270:7947550,18702884:24379392,395758,118751
k1,270:17773667,18702884:9826117
h1,269:17773667,18702884:0,0,0
$1,269:17773667,18702884
(1,269:17773667,18512568:247123,205442,2227
x1,269:17988022,18512568
)
$1,269:18020790,18702884
x1,269:18326974,18702884
x1,269:20918526,18702884
g1,269:21027053,18702884
x1,269:22009044,18702884
x1,269:22500825,18702884
g1,270:22500825,18702884
k1,270:32326942,18702884:9826117
)
]
]
(1,317:7947550,20268318:24379392,449576,148438
h1,316:7947550,20268318:655360,0,0
x1,316:9887413,20268318
x1,316:11444545,20268318
x1,316:11568408,20268318
k1,316:11764166,20268318:195758
x1,316:12646934,20268318
k1,316:12830672,20268318:183738
x1,316:13904150,20268318
x1,316:14618492,20268318
x1,316:14853110,20268318
x1,316:15330866,20268318
k1,316:15514605,20268318:183739
x1,316:16161445,20268318
x1,316:16471430,20268318
x1,316:17031107,20268318
x1,316:18658364,20268318
k1,316:18842102,20268318:183738
x1,316:19391948,20268318
x1,316:19690136,20268318
k1,316:19873874,20268318:183738
x1,316:20656373,20268318
x1,316:20832009,20268318
x1,316:21427075,20268318
x1,316:22613930,20268318
k1,316:22797669,20268318:183739
x1,316:23352758,20268318
k1,316:23536496,20268318:183738
x1,316:24268532,20268318
x1,316:24869496,20268318
x1,316:25213560,20268318
x1,316:25499296,20268318
x1,316:25806004,20268318
k1,316:25989742,20268318:183738
x1,316:26872510,20268318
k1,316:27056249,20268318:183739
x1,316:27670321,20268318
x1,316:28334855,20268318
x1,316:28569473,20268318
x1,316:29483043,20268318
x1,316:29585934,20268318
k1,316:29898599,20268318:312665
x1,316:30948484,20268318
k1,316:31132222,20268318:183738
x1,316:31914721,20268318
x1,316:32090357,20268318
x1,316:32326942,20268318
k1,317:32326942,20268318:0
)
(1,317:7947550,21054750:24379392,449576,148438
x1,317:8542616,21054750
x1,317:9729471,21054750
k1,316:9880263,21054750:150792
x1,316:10928839,21054750
k1,316:11079632,21054750:150793
x1,316:12410013,21054750
x1,316:13963214,21054750
x1,316:15150069,21054750
k1,316:15300861,21054750:150792
x1,316:16374339,21054750
x1,316:17088681,21054750
x1,316:17323299,21054750
x1,316:17801055,21054750
k1,316:17951847,21054750:150792
x1,316:18598687,21054750
x1,316:18908672,21054750
x1,316:19468349,21054750
x1,316:21095606,21054750
k1,316:21246399,21054750:150793
x1,316:21796245,21054750
x1,316:22094433,21054750
k1,316:22245225,21054750:150792
x1,316:23221710,21054750
x1,316:24039599,21054750
k1,316:24190391,21054750:150792
x1,316:24738927,21054750
k1,316:24889720,21054750:150793
x1,316:25239682,21054750
x1,316:25882588,21054750
k1,316:26096415,21054750:213827
x1,316:26416230,21054750
h1,316:26416230,21054750:0,0,0
x1,316:26576138,21054750
k1,316:26730713,21054750:154575
x1,316:28104345,21054750
x1,316:28402533,21054750
k1,316:28553326,21054750:150793
x1,316:29436094,21054750
k1,316:29586886,21054750:150792
x1,316:30369385,21054750
x1,316:30545021,21054750
x1,316:31140087,21054750
x1,316:32326942,21054750
k1,316:32326942,21054750:0
)
(1,317:7947550,21841182:24379392,449576,148438
x1,317:9021028,21841182
x1,317:9735370,21841182
x1,317:9969988,21841182
x1,317:10447744,21841182
k1,316:10590233,21841182:142489
x1,316:11237073,21841182
x1,316:11547058,21841182
x1,316:12106735,21841182
x1,316:13733992,21841182
k1,316:13876482,21841182:142490
x1,316:14479412,21841182
x1,316:15763915,21841182
k1,316:15906404,21841182:142489
x1,316:16783930,21841182
x1,316:17535626,21841182
k1,316:17678115,21841182:142489
x1,316:18672950,21841182
x1,316:18848586,21841182
x1,316:19332241,21841182
x1,316:19566859,21841182
x1,316:20259572,21841182
k1,316:20402061,21841182:142489
x1,316:20957150,21841182
k1,316:21099640,21841182:142490
x1,316:22637769,21841182
k1,316:22780258,21841182:142489
x1,316:23145948,21841182
x1,316:23435615,21841182
x1,316:24115223,21841182
k1,316:24257712,21841182:142489
x1,316:26223132,21841182
k1,316:26365621,21841182:142489
x1,316:26680849,21841182
k1,316:26823339,21841182:142490
x1,316:27788683,21841182
k1,316:27931172,21841182:142489
x1,316:29004650,21841182
x1,316:29718992,21841182
x1,316:29953610,21841182
x1,316:30431366,21841182
k1,316:30573855,21841182:142489
x1,316:31220695,21841182
x1,316:31530680,21841182
x1,316:32090357,21841182
x1,316:32326942,21841182
k1,317:32326942,21841182:0
)
(1,317:7947550,22627614:24379392,449576,148438
x1,317:9574807,22627614
k1,316:9744549,22627614:169742
x1,316:11064442,22627614
k1,316:11234183,22627614:169741
x1,316:11468801,22627614
x1,316:12082217,22627614
x1,316:13065912,22627614
x1,316:14220000,22627614
k1,316:14389742,22627614:169742
x1,316:15003814,22627614
x1,316:15668348,22627614
x1,316:15902966,22627614
x1,316:16816536,22627614
k1,316:16986277,22627614:169741
x1,316:18198035,22627614
x1,316:19118814,22627614
k1,316:19288556,22627614:169742
x1,316:20071055,22627614
x1,316:20246691,22627614
x1,316:20841757,22627614
x1,316:21151086,22627614
x1,316:22414619,22627614
k1,316:22592881,22627614:178262
x1,316:23165665,22627614
x1,316:23469751,22627614
x1,316:24011077,22627614
x1,316:24488833,22627614
k1,316:24658575,22627614:169742
x1,316:26496203,22627614
k1,316:26665944,22627614:169741
x1,316:27648326,22627614
k1,316:27818068,22627614:169742
x1,316:28052686,22627614
x1,316:28350874,22627614
x1,316:29483333,22627614
x1,316:29781521,22627614
k1,316:29951262,22627614:169741
x1,316:30962480,22627614
k1,316:31132222,22627614:169742
x1,316:31914721,22627614
x1,316:32090357,22627614
x1,316:32326942,22627614
k1,317:32326942,22627614:0
)
(1,317:7947550,23414046:24379392,449576,148438
x1,317:8542616,23414046
x1,317:8851945,23414046
x1,317:9955570,23414046
k1,316:10100946,23414046:145376
x1,316:10656035,23414046
k1,316:10801411,23414046:145376
x1,316:12570880,23414046
x1,316:12877588,23414046
k1,316:13022965,23414046:145377
x1,316:13651454,23414046
x1,316:14211131,23414046
x1,316:15575589,23414046
k1,316:15720965,23414046:145376
x1,316:16335037,23414046
x1,316:16999571,23414046
x1,316:17234189,23414046
x1,316:17543518,23414046
x1,316:18590782,23414046
x1,316:18738893,23414046
k1,316:18936471,23414046:197578
x1,316:19286433,23414046
x1,316:19929339,23414046
k1,316:20126918,23414046:197579
x1,316:20446733,23414046
h1,316:20446733,23414046:0,0,0
k1,316:20592109,23414046:145376
x1,316:21262542,23414046
x1,316:22573260,23414046
k1,316:22718636,23414046:145376
x1,316:23601404,23414046
k1,316:23746780,23414046:145376
x1,316:25366828,23414046
k1,316:25512204,23414046:145376
x1,316:26602066,23414046
k1,316:26747443,23414046:145377
x1,316:28653228,23414046
k1,316:28798604,23414046:145376
x1,316:29681372,23414046
k1,316:29826748,23414046:145376
x1,316:30900226,23414046
x1,316:31614568,23414046
x1,316:31849186,23414046
x1,316:32326942,23414046
k1,316:32326942,23414046:0
)
(1,317:7947550,24200478:24379392,449576,148438
x1,317:8594390,24200478
x1,317:8904375,24200478
x1,317:9464052,24200478
x1,317:11091309,24200478
x1,317:11239420,24200478
k1,316:11530717,24200478:291297
x1,316:11741087,24200478
x1,316:11933761,24200478
k1,316:12110377,24200478:176616
x1,316:12548812,24200478
k1,316:12725428,24200478:176616
x1,316:13433872,24200478
x1,316:14241274,24200478
x1,316:14556501,24200478
x1,316:15223657,24200478
k1,316:15400273,24200478:176616
x1,316:16495377,24200478
k1,316:16671992,24200478:176615
x1,316:17554760,24200478
k1,316:17731376,24200478:176616
x1,316:18804854,24200478
x1,316:19519196,24200478
x1,316:19753814,24200478
x1,316:20231570,24200478
k1,316:20408186,24200478:176616
x1,316:21055026,24200478
x1,316:21365011,24200478
x1,316:21924688,24200478
x1,316:23551945,24200478
k1,316:23728561,24200478:176616
x1,316:24278407,24200478
x1,316:24576595,24200478
k1,316:24753210,24200478:176615
x1,316:25680543,24200478
x1,316:26814970,24200478
x1,316:28014931,24200478
k1,316:28191547,24200478:176616
x1,316:28974046,24200478
x1,316:29149682,24200478
x1,316:29744748,24200478
x1,316:31091511,24200478
k1,316:31278366,24200478:186855
x1,316:32326942,24200478
k1,316:32326942,24200478:0
)
(1,317:7947550,24986910:24379392,449576,148438
x1,317:8830318,24986910
g1,316:8965977,24986910
x1,316:9200595,24986910
x1,316:9498783,24986910
x1,316:10502792,24986910
x1,316:11364589,24986910
g1,316:11500248,24986910
x1,316:12215900,24986910
x1,316:12660889,24986910
g1,316:12796548,24986910
x1,316:14003064,24986910
g1,316:14138723,24986910
x1,316:14577158,24986910
g1,316:14712817,24986910
x1,316:15464513,24986910
x1,316:16013049,24986910
x1,316:16380705,24986910
x1,316:18048594,24986910
g1,316:18184253,24986910
x1,316:19179088,24986910
x1,316:19354724,24986910
x1,316:20072997,24986910
g1,316:20208656,24986910
x1,316:20763745,24986910
g1,316:20899404,24986910
x1,316:21994508,24986910
g1,316:22130167,24986910
x1,316:22731131,24986910
x1,316:23029319,24986910
x1,316:24741773,24986910
g1,316:24877432,24986910
x1,316:25237880,24986910
x1,316:25528203,24986910
g1,316:25663862,24986910
x1,316:27201991,24986910
k1,317:32326942,24986910:5124951
g1,317:32326942,24986910
)
(1,363:7947550,25773342:24379392,449576,148438
h1,362:7947550,25773342:655360,0,0
x1,362:9893968,25773342
k1,362:10092894,25773342:198926
x1,362:11930522,25773342
k1,362:12129512,25773342:198990
x1,362:13178088,25773342
k1,362:13377078,25773342:198990
x1,362:14023918,25773342
x1,362:14493154,25773342
x1,362:14791342,25773342
x1,362:16501831,25773342
x1,362:17363628,25773342
k1,362:17562617,25773342:198989
x1,362:18636095,25773342
x1,362:19350437,25773342
x1,362:19585055,25773342
x1,362:20062811,25773342
k1,362:20261801,25773342:198990
x1,362:20908641,25773342
x1,362:21218626,25773342
x1,362:21778303,25773342
x1,362:23405560,25773342
k1,362:23604550,25773342:198990
x1,362:24154396,25773342
x1,362:24452584,25773342
k1,362:24651574,25773342:198990
x1,362:25265646,25773342
x1,362:26398105,25773342
x1,362:27216649,25773342
k1,362:27431471,25773342:214822
x1,362:28480047,25773342
k1,362:28679037,25773342:198990
x1,362:29561805,25773342
k1,362:29760795,25773342:198990
x1,362:30476447,25773342
x1,362:30921436,25773342
k1,362:31120426,25773342:198990
x1,362:32326942,25773342
k1,362:32326942,25773342:0
)
(1,363:7947550,26559774:24379392,449576,148438
x1,363:8385985,26559774
k1,362:8587796,26559774:201811
x1,362:8822414,26559774
x1,362:9120602,26559774
x1,362:10140342,26559774
x1,362:10844852,26559774
x1,362:12551407,26559774
k1,362:12918291,26559774:366884
x1,362:13968176,26559774
k1,362:14169987,26559774:201811
x1,362:14885639,26559774
x1,362:15330628,26559774
k1,362:15532439,26559774:201811
x1,362:16738955,26559774
k1,362:16940766,26559774:201811
x1,362:17175384,26559774
x1,362:17473572,26559774
x1,362:18493312,26559774
x1,362:19197822,26559774
x1,362:20744469,26559774
k1,362:20946280,26559774:201811
x1,362:21574769,26559774
x1,362:22436566,26559774
k1,362:22638377,26559774:201811
x1,362:23521145,26559774
k1,362:23722956,26559774:201811
x1,362:24323920,26559774
x1,362:24667984,26559774
x1,362:26315558,26559774
k1,362:26517369,26559774:201811
x1,362:26905342,26559774
x1,362:27919182,26559774
k1,362:28120927,26559774:201745
x1,362:29169503,26559774
k1,362:29371314,26559774:201811
x1,362:30016842,26559774
k1,362:30218653,26559774:201811
x1,362:30801267,26559774
x1,362:31294751,26559774
x1,362:31470387,26559774
x1,362:32326942,26559774
k1,362:32326942,26559774:0
)
(1,363:7947550,27346206:24379392,449576,148438
x1,363:9332980,27346206
x1,363:9850058,27346206
x1,363:11000868,27346206
x1,363:11212548,27346206
k1,362:11382638,27346206:170090
x1,362:11932484,27346206
x1,362:12230672,27346206
k1,362:12400762,27346206:170090
x1,362:13001726,27346206
x1,362:13299914,27346206
x1,362:15123124,27346206
k1,362:15293214,27346206:170090
x1,362:15841750,27346206
k1,362:16011840,27346206:170090
x1,362:16361802,27346206
x1,362:17004708,27346206
k1,362:17276428,27346206:271720
x1,362:17596243,27346206
h1,362:17596243,27346206:0,0,0
x1,362:17756151,27346206
k1,362:18027870,27346206:271719
x1,362:19077755,27346206
k1,362:19247845,27346206:170090
x1,362:19563073,27346206
x1,362:19867159,27346206
x1,362:20173867,27346206
x1,362:20408485,27346206
x1,362:21341060,27346206
k1,362:21511150,27346206:170090
x1,362:22310033,27346206
x1,362:22843495,27346206
x1,362:23508029,27346206
x1,362:24800398,27346206
k1,362:24970488,27346206:170090
x1,362:25640921,27346206
x1,362:26311353,27346206
x1,362:27300291,27346206
k1,362:27470381,27346206:170090
x1,362:28353149,27346206
k1,362:28523239,27346206:170090
x1,362:28757857,27346206
x1,362:29056045,27346206
x1,362:30075785,27346206
x1,362:30780295,27346206
x1,362:32326942,27346206
k1,362:32326942,27346206:0
)
(1,363:7947550,28132638:24379392,449576,148438
x1,363:9216980,28132638
k1,362:9390434,28132638:173454
x1,362:9694520,28132638
x1,362:10001228,28132638
x1,362:10816495,28132638
x1,362:11504621,28132638
k1,362:11678074,28132638:173453
x1,362:12884590,28132638
k1,362:13058044,28132638:173454
x1,362:14106620,28132638
k1,362:14280074,28132638:173454
x1,362:15375178,28132638
k1,362:15548631,28132638:173453
x1,362:16088647,28132638
k1,362:16262101,28132638:173454
x1,362:17144869,28132638
k1,362:17318323,28132638:173454
x1,362:17900937,28132638
x1,362:18394421,28132638
x1,362:18570057,28132638
x1,362:19426612,28132638
k1,362:19600065,28132638:173453
x1,362:20038500,28132638
k1,362:20211954,28132638:173454
x1,362:21851008,28132638
k1,362:22024462,28132638:173454
x1,362:22579551,28132638
k1,362:22753004,28132638:173453
x1,362:23423437,28132638
k1,362:23596891,28132638:173454
x1,362:25061619,28132638
k1,362:25343430,28132638:281811
x1,362:26393315,28132638
k1,362:26566769,28132638:173454
x1,362:27365652,28132638
x1,362:27899114,28132638
x1,362:28563648,28132638
x1,362:29856017,28132638
k1,362:30029470,28132638:173453
x1,362:30578006,28132638
k1,362:30751460,28132638:173454
x1,362:31503156,28132638
x1,362:32326942,28132638
k1,362:32326942,28132638:0
)
(1,363:7947550,28919070:24379392,449576,84868
x1,363:8487566,28919070
k1,362:8671609,28919070:184043
x1,362:9962667,28919070
k1,362:10146662,28919070:183995
x1,362:11984290,28919070
k1,362:12168333,28919070:184043
x1,362:12718179,28919070
x1,362:13016367,28919070
k1,362:13200411,28919070:184044
x1,362:14176896,28919070
x1,362:14994785,28919070
k1,362:15178828,28919070:184043
x1,362:15727364,28919070
k1,362:15911407,28919070:184043
x1,362:16285617,28919070
x1,362:16540551,28919070
x1,362:17379411,28919070
k1,362:17563455,28919070:184044
x1,362:17883270,28919070
h1,362:17883270,28919070:0,0,0
x1,362:18043178,28919070
k1,362:18356758,28919070:313580
x1,362:19002287,28919070
k1,362:19186330,28919070:184043
x1,362:20325344,28919070
x1,362:20623532,28919070
k1,362:20807575,28919070:184043
x1,362:22102565,28919070
x1,362:23007616,28919070
k1,362:23191660,28919070:184044
x1,362:23731676,28919070
k1,362:23915719,28919070:184043
x1,362:25206777,28919070
k1,362:25390772,28919070:183995
x1,362:27228400,28919070
k1,362:27412443,28919070:184043
x1,362:27962289,28919070
x1,362:28260477,28919070
k1,362:28444520,28919070:184043
x1,362:29903350,28919070
k1,362:30099490,28919070:196140
x1,362:30982258,28919070
k1,362:31166301,28919070:184043
x1,362:31881953,28919070
x1,362:32326942,28919070
k1,362:32326942,28919070:0
)
(1,363:7947550,29705502:24379392,449576,148438
x1,363:9154066,29705502
k1,362:9348948,29705502:194882
x1,362:10147831,29705502
x1,362:10681293,29705502
x1,362:11345827,29705502
x1,362:12638196,29705502
k1,362:12833078,29705502:194882
x1,362:13808907,29705502
k1,362:14003789,29705502:194882
x1,362:14674222,29705502
x1,362:15207684,29705502
x1,362:16393884,29705502
x1,362:16541995,29705502
k1,362:16888091,29705502:346096
x1,362:17369125,29705502
x1,362:17698771,29705502
x1,362:18143760,29705502
x1,362:18753899,29705502
x1,362:19295225,29705502
x1,362:19419088,29705502
k1,362:19628776,29705502:209688
x1,362:19996432,29705502
k1,362:20191314,29705502:194882
x1,362:20830944,29705502
k1,362:21025826,29705502:194882
x1,362:21608440,29705502
k1,362:21803322,29705502:194882
x1,362:22521595,29705502
x1,362:23375527,29705502
k1,362:23570409,29705502:194882
x1,362:24865399,29705502
x1,362:25770450,29705502
k1,362:25965332,29705502:194882
x1,362:26505348,29705502
k1,362:26700230,29705502:194882
x1,362:28537858,29705502
k1,362:28732740,29705502:194882
x1,362:29282586,29705502
x1,362:29580774,29705502
k1,362:29775656,29705502:194882
x1,362:31234486,29705502
k1,362:31444174,29705502:209688
x1,362:32326942,29705502
k1,362:32326942,29705502:0
)
(1,363:7947550,30491934:24379392,449576,148438
x1,363:8262778,30491934
x1,363:8566864,30491934
x1,363:8873572,30491934
x1,363:9108190,30491934
x1,363:10040765,30491934
k1,362:10205265,30491934:164500
x1,362:11004148,30491934
x1,362:11537610,30491934
x1,362:12202144,30491934
x1,362:13494513,30491934
k1,362:13659012,30491934:164499
x1,362:14634841,30491934
k1,362:14799341,30491934:164500
x1,362:15347877,30491934
x1,362:15881339,30491934
x1,362:17067539,30491934
x1,362:17215650,30491934
k1,362:17470599,30491934:254949
x1,362:17796968,30491934
x1,362:18812773,30491934
k1,362:18977273,30491934:164500
x1,362:20019294,30491934
x1,362:22700371,30491934
k1,362:22864871,30491934:164500
x1,362:23511711,30491934
x1,362:24410863,30491934
k1,362:24575362,30491934:164499
x1,362:26087276,30491934
k1,362:26251776,30491934:164500
x1,362:27154861,30491934
k1,362:27319361,30491934:164500
x1,362:28869286,30491934
k1,362:29033785,30491934:164499
x1,362:30324843,30491934
k1,362:30489314,30491934:164471
x1,362:32326942,30491934
k1,362:32326942,30491934:0
)
(1,363:7947550,31278366:24379392,449576,148438
x1,363:9101638,31278366
k1,362:9224783,31278366:123145
x1,362:9779872,31278366
k1,362:9903018,31278366:123146
x1,362:10976496,31278366
x1,362:11690838,31278366
x1,362:11925456,31278366
x1,362:12403212,31278366
k1,362:12526357,31278366:123145
x1,362:13173197,31278366
x1,362:13483182,31278366
x1,362:14042859,31278366
x1,362:15407317,31278366
k1,362:15530463,31278366:123146
x1,362:16085552,31278366
k1,362:16208697,31278366:123145
x1,362:16744781,31278366
x1,362:17048867,31278366
x1,362:17355575,31278366
x1,362:17590193,31278366
x1,362:19191236,31278366
x1,362:20389232,31278366
k1,362:20512378,31278366:123146
x1,362:21715618,31278366
x1,362:22447654,31278366
x1,362:22969975,31278366
x1,362:24557255,31278366
k1,362:24680400,31278366:123145
x1,362:25929514,31278366
k1,362:26052660,31278366:123146
x1,362:26287278,31278366
x1,362:26585466,31278366
x1,362:27717925,31278366
x1,362:28376561,31278366
k1,362:28499706,31278366:123145
x1,362:29274340,31278366
k1,362:29397486,31278366:123146
x1,362:30925129,31278366
x1,362:31313102,31278366
x1,362:32326942,31278366
k1,362:32326942,31278366:0
)
(1,363:7947550,32064798:24379392,449576,84868
x1,363:8496086,32064798
k1,362:8667251,32064798:171165
x1,362:9418947,32064798
x1,362:10242733,32064798
k1,362:10413899,32064798:171166
x1,362:10953915,32064798
k1,362:11125080,32064798:171165
x1,362:12007848,32064798
k1,362:12179013,32064798:171165
x1,362:13474003,32064798
x1,362:14379054,32064798
k1,362:14550220,32064798:171166
x1,362:15090236,32064798
k1,362:15261401,32064798:171165
x1,362:16552459,32064798
k1,362:16723589,32064798:171130
x1,362:18561217,32064798
k1,362:18732382,32064798:171165
x1,362:20031304,32064798
k1,362:20202469,32064798:171165
x1,362:20752315,32064798
x1,362:21050503,32064798
k1,362:21221669,32064798:171166
x1,362:22198154,32064798
x1,362:23016043,32064798
k1,362:23187208,32064798:171165
x1,362:23735744,32064798
k1,362:23906910,32064798:171166
x1,362:24281120,32064798
x1,362:24536054,32064798
x1,362:25374914,32064798
k1,362:25546079,32064798:171165
x1,362:25865894,32064798
h1,362:25865894,32064798:0,0,0
x1,362:26025802,32064798
k1,362:26300748,32064798:274946
x1,362:26511118,32064798
x1,362:26872876,32064798
k1,362:27044041,32064798:171165
x1,362:28055259,32064798
k1,362:28226425,32064798:171166
x1,362:29413281,32064798
x1,362:29561392,32064798
k1,362:29741434,32064798:180042
x1,362:30624202,32064798
k1,362:30795367,32064798:171165
x1,362:32090357,32064798
x1,362:32326942,32064798
k1,363:32326942,32064798:0
)
(1,363:7947550,32851230:24379392,449576,148438
x1,363:8852601,32851230
k1,362:8974782,32851230:122181
x1,362:9514798,32851230
k1,362:9636979,32851230:122181
x1,362:10928037,32851230
k1,362:11050205,32851230:122168
x1,362:12887833,32851230
k1,362:13010014,32851230:122181
x1,362:14308936,32851230
k1,362:14431117,32851230:122181
x1,362:15712345,32851230
k1,362:15834526,32851230:122181
x1,362:16762515,32851230
k1,362:16884696,32851230:122181
x1,362:17199924,32851230
x1,362:18399887,32851230
k1,362:18522068,32851230:122181
x1,362:19404836,32851230
k1,362:19527017,32851230:122181
x1,362:20730257,32851230
x1,362:21462293,32851230
x1,362:21984614,32851230
x1,362:23571894,32851230
k1,362:23694075,32851230:122181
x1,362:24943189,32851230
k1,362:25065370,32851230:122181
x1,362:25613249,32851230
x1,362:26907582,32851230
k1,362:27029763,32851230:122181
x1,362:27339748,32851230
x1,362:27632693,32851230
x1,362:28807752,32851230
k1,362:28929933,32851230:122181
x1,362:29704567,32851230
k1,362:29826748,32851230:122181
x1,362:30900226,32851230
x1,362:31614568,32851230
x1,362:31849186,32851230
x1,362:32326942,32851230
k1,362:32326942,32851230:0
)
(1,363:7947550,33637662:24379392,449576,135003
x1,363:8594390,33637662
x1,363:8904375,33637662
x1,363:9464052,33637662
x1,363:10828510,33637662
k1,362:11041564,33637662:213054
x1,362:11824063,33637662
x1,362:11999699,33637662
x1,362:12594765,33637662
x1,362:12904094,33637662
x1,362:14167627,33637662
k1,362:14568240,33637662:400613
x1,362:14894609,33637662
x1,362:16040177,33637662
k1,362:16253232,33637662:213055
x1,362:17136000,33637662
k1,362:17349054,33637662:213054
x1,362:18013588,33637662
x1,362:18482824,33637662
x1,362:19361005,33637662
k1,362:19574060,33637662:213055
x1,362:20647538,33637662
x1,362:21361880,33637662
x1,362:21596498,33637662
x1,362:22074254,33637662
k1,362:22287308,33637662:213054
x1,362:22934148,33637662
x1,362:23244133,33637662
x1,362:23803810,33637662
x1,362:25168268,33637662
k1,362:25381322,33637662:213054
x1,362:26163821,33637662
x1,362:26339457,33637662
x1,362:26934523,33637662
x1,362:27243852,33637662
x1,362:28347477,33637662
k1,362:28560532,33637662:213055
x1,362:30664235,33637662
k1,362:30877289,33637662:213054
x1,362:31111907,33637662
x1,362:31410095,33637662
x1,362:32326942,33637662
k1,362:32326942,33637662:0
)
(1,363:7947550,34424094:24379392,449576,148438
x1,363:8668446,34424094
k1,362:8837547,34424094:169101
x1,362:9551889,34424094
x1,362:9934618,34424094
x1,362:11271551,34424094
x1,362:12535084,34424094
k1,362:12712546,34424094:177462
x1,362:13430819,34424094
x1,362:14284751,34424094
k1,362:14453852,34424094:169101
x1,362:15748842,34424094
x1,362:16653893,34424094
k1,362:16822995,34424094:169102
x1,362:17363011,34424094
k1,362:17532112,34424094:169101
x1,362:18823170,34424094
k1,362:18992237,34424094:169067
x1,362:20829865,34424094
k1,362:20998967,34424094:169102
x1,362:22153055,34424094
k1,362:22322156,34424094:169101
x1,362:22877245,34424094
k1,362:23046346,34424094:169101
x1,362:23280964,34424094
x1,362:24966547,34424094
k1,362:25135648,34424094:169101
x1,362:25684184,34424094
x1,362:26217646,34424094
x1,362:27403846,34424094
k1,362:27572948,34424094:169102
x1,362:28112964,34424094
k1,362:28282065,34424094:169101
x1,362:29485305,34424094
x1,362:30217341,34424094
x1,362:30739662,34424094
x1,362:32326942,34424094
k1,362:32326942,34424094:0
)
(1,363:7947550,35210526:24379392,449576,148438
x1,363:9196664,35210526
x1,362:9344775,35210526
k1,362:9720872,35210526:376097
x1,362:10180279,35210526
x1,362:10549902,35210526
k1,362:10754784,35210526:204882
x1,362:11637552,35210526
k1,362:11842435,35210526:204883
x1,362:13307817,35210526
k1,362:13512699,35210526:204882
x1,362:15086873,35210526
k1,362:15309061,35210526:222188
x1,362:15543679,35210526
x1,362:16311759,35210526
k1,362:16516642,35210526:204883
x1,362:17056658,35210526
k1,362:17261540,35210526:204882
x1,362:18464780,35210526
x1,362:19196816,35210526
x1,362:19719137,35210526
x1,362:21085561,35210526
k1,362:21290443,35210526:204882
x1,362:21840289,35210526
x1,362:22138477,35210526
k1,362:22343360,35210526:204883
x1,362:23347370,35210526
k1,362:23552252,35210526:204882
x1,362:23867480,35210526
x1,362:25737876,35210526
k1,362:25942759,35210526:204883
x1,362:26303207,35210526
x1,362:26593530,35210526
k1,362:26798412,35210526:204882
x1,362:27681180,35210526
k1,362:27886062,35210526:204882
x1,362:29181052,35210526
x1,362:30086103,35210526
k1,362:30290986,35210526:204883
x1,362:30831002,35210526
k1,362:31035884,35210526:204882
x1,362:32326942,35210526
k1,362:32326942,35210526:0
)
(1,363:7947550,35996958:24379392,449576,135003
x1,363:9785178,35996958
k1,362:9932212,35996958:147034
x1,362:11231134,35996958
k1,362:11378169,35996958:147035
x1,362:12048602,35996958
x1,362:13601148,35996958
k1,362:13748182,35996958:147034
x1,362:14630950,35996958
k1,362:14777985,35996958:147035
x1,362:16095258,35996958
x1,362:17278836,35996958
k1,362:17425870,35996958:147034
x1,362:18297498,35996958
x1,362:18739209,35996958
x1,362:19212377,35996958
k1,362:19359411,35996958:147034
x1,362:19797846,35996958
k1,362:19944881,35996958:147035
x1,362:21576070,35996958
k1,362:21778623,35996958:202553
x1,362:22259657,35996958
x1,362:22589303,35996958
x1,362:23034292,35996958
x1,362:23644431,35996958
x1,362:24185757,35996958
x1,362:24309620,35996958
k1,362:24459498,35996958:149878
x1,362:24842227,35996958
k1,362:24989261,35996958:147034
x1,362:25427696,35996958
k1,362:25574731,35996958:147035
x1,362:27213785,35996958
k1,362:27360819,35996958:147034
x1,362:28455923,35996958
k1,362:28602958,35996958:147035
x1,362:29485726,35996958
k1,362:29632760,35996958:147034
x1,362:30836000,35996958
x1,362:31568036,35996958
x1,362:32090357,35996958
x1,362:32326942,35996958
k1,363:32326942,35996958:0
)
(1,363:7947550,36783390:24379392,449576,148438
x1,363:9534830,36783390
k1,362:9643201,36783390:108371
x1,362:10892315,36783390
k1,362:11000686,36783390:108371
x1,362:11235304,36783390
x1,362:11533492,36783390
x1,362:12665951,36783390
x1,362:13324587,36783390
k1,362:13432958,36783390:108371
x1,362:14207592,36783390
k1,362:14315963,36783390:108371
x1,362:15690251,36783390
k1,362:15798622,36783390:108371
x1,362:16338638,36783390
k1,362:16447009,36783390:108371
x1,362:17329777,36783390
k1,362:17438148,36783390:108371
x1,362:18039112,36783390
x1,362:18383176,36783390
x1,362:20090387,36783390
k1,362:20198758,36783390:108371
x1,362:20747294,36783390
x1,362:21280756,36783390
x1,362:22729755,36783390
k1,362:22838126,36783390:108371
x1,362:24804856,36783390
k1,362:24913227,36783390:108371
x1,362:26425141,36783390
k1,362:26533512,36783390:108371
x1,362:27672526,36783390
x1,362:27970714,36783390
k1,362:28079085,36783390:108371
x1,362:29374075,36783390
x1,362:30279126,36783390
k1,362:30387497,36783390:108371
x1,362:30927513,36783390
k1,362:31035884,36783390:108371
x1,362:32326942,36783390
k1,362:32326942,36783390:0
)
(1,363:7947550,37569822:24379392,449576,148438
x1,363:9785178,37569822
k1,362:9914092,37569822:128914
x1,362:10463938,37569822
x1,362:10762126,37569822
k1,362:10891039,37569822:128913
x1,362:12349869,37569822
k1,362:12516048,37569822:166179
x1,362:13565933,37569822
k1,362:13694847,37569822:128914
x1,362:14898087,37569822
x1,362:15630123,37569822
x1,362:16152444,37569822
x1,362:17739724,37569822
k1,362:17868637,37569822:128913
x1,362:19117751,37569822
k1,362:19246665,37569822:128914
x1,362:20295241,37569822
k1,362:20424154,37569822:128913
x1,362:20739382,37569822
x1,362:21043468,37569822
x1,362:21350176,37569822
x1,362:21584794,37569822
x1,362:22517369,37569822
k1,362:22646283,37569822:128914
x1,362:23445166,37569822
x1,362:23978628,37569822
x1,362:24643162,37569822
x1,362:25935531,37569822
k1,362:26064445,37569822:128914
x1,362:26612981,37569822
k1,362:26741894,37569822:128913
x1,362:27493590,37569822
x1,362:28317376,37569822
k1,362:28446290,37569822:128914
x1,362:28986306,37569822
k1,362:29115219,37569822:128913
x1,362:29997987,37569822
k1,362:30126901,37569822:128914
x1,362:31421891,37569822
x1,362:32326942,37569822
k1,362:32326942,37569822:0
)
(1,363:7947550,38356254:24379392,449576,135003
x1,363:8487566,38356254
k1,362:8673075,38356254:185509
x1,362:9990348,38356254
x1,362:11436725,38356254
k1,362:11622235,38356254:185510
x1,362:12172081,38356254
x1,362:12470269,38356254
k1,362:12655778,38356254:185509
x1,362:13632263,38356254
x1,362:14450152,38356254
k1,362:14635662,38356254:185510
x1,362:15184198,38356254
k1,362:15369707,38356254:185509
x1,362:15743917,38356254
x1,362:15998851,38356254
x1,362:16837711,38356254
k1,362:17023221,38356254:185510
x1,362:17343036,38356254
h1,362:17343036,38356254:0,0,0
x1,362:17502944,38356254
k1,362:17820922,38356254:317978
x1,362:18870807,38356254
k1,362:19056316,38356254:185509
x1,362:20351306,38356254
x1,362:21256357,38356254
k1,362:21441867,38356254:185510
x1,362:21981883,38356254
k1,362:22167392,38356254:185509
x1,362:23484665,38356254
x1,362:24931042,38356254
k1,362:25116552,38356254:185510
x1,362:26415474,38356254
k1,362:26600983,38356254:185509
x1,362:26916211,38356254
x1,362:28378973,38356254
k1,362:28564483,38356254:185510
x1,362:29447251,38356254
k1,362:29632760,38356254:185509
x1,362:30836000,38356254
x1,362:31568036,38356254
x1,362:32090357,38356254
x1,362:32326942,38356254
k1,363:32326942,38356254:0
)
(1,363:7947550,39142686:24379392,449576,148438
x1,363:9534830,39142686
k1,362:9661318,39142686:126488
x1,362:10910432,39142686
k1,362:11036919,39142686:126487
x1,362:11584798,39142686
x1,362:12879131,39142686
k1,362:13005619,39142686:126488
x1,362:13583646,39142686
k1,362:13710133,39142686:126487
x1,362:15001191,39142686
k1,362:15127670,39142686:126479
x1,362:16702499,39142686
k1,362:16828987,39142686:126488
x1,362:17877563,39142686
k1,362:18004050,39142686:126487
x1,362:18650890,39142686
x1,362:18960875,39142686
x1,362:19520552,39142686
x1,362:20885010,39142686
k1,362:21011498,39142686:126488
x1,362:22031238,39142686
x1,362:22735748,39142686
x1,362:23404869,39142686
x1,362:24508494,39142686
k1,362:24634981,39142686:126487
x1,362:25683557,39142686
k1,362:25810045,39142686:126488
x1,362:26692813,39142686
k1,362:26819300,39142686:126487
x1,362:27892778,39142686
x1,362:28607120,39142686
x1,362:28841738,39142686
x1,362:29319494,39142686
k1,362:29445982,39142686:126488
x1,362:30092822,39142686
x1,362:30402807,39142686
x1,362:30962484,39142686
x1,362:32326942,39142686
k1,362:32326942,39142686:0
)
(1,363:7947550,39929118:24379392,449576,148438
x1,363:8730049,39929118
x1,363:8905685,39929118
x1,363:9500751,39929118
x1,363:9810080,39929118
x1,363:10913705,39929118
k1,362:11055092,39929118:141387
x1,362:12258332,39929118
x1,362:12990368,39929118
x1,362:13512689,39929118
x1,362:15099969,39929118
k1,362:15241355,39929118:141386
x1,362:16433454,39929118
k1,362:16574841,39929118:141387
x1,362:17123377,39929118
x1,362:17656839,39929118
x1,362:19105838,39929118
k1,362:19247224,39929118:141386
x1,362:19481842,39929118
x1,362:21167425,39929118
x1,362:21270316,39929118
k1,362:21455926,39929118:185610
x1,362:21936960,39929118
x1,362:22266606,39929118
x1,362:22711595,39929118
x1,362:23321734,39929118
x1,362:23863060,39929118
x1,362:23986923,39929118
k1,362:24129741,39929118:142818
x1,362:25012509,39929118
k1,362:25153895,39929118:141386
x1,362:25469123,39929118
x1,362:25773209,39929118
x1,362:26079917,39929118
x1,362:26314535,39929118
x1,362:27247110,39929118
k1,362:27388497,39929118:141387
x1,362:28187380,39929118
x1,362:28720842,39929118
x1,362:29385376,39929118
x1,362:30677745,39929118
k1,362:30819131,39929118:141386
x1,362:31257566,39929118
k1,362:31398953,39929118:141387
x1,362:32326942,39929118
k1,362:32326942,39929118:0
)
(1,363:7947550,40715550:24379392,449576,148438
x1,363:8262778,40715550
x1,363:10133174,40715550
k1,362:10319124,40715550:185950
x1,362:10679572,40715550
x1,362:10969895,40715550
k1,362:11155844,40715550:185949
x1,362:12038612,40715550
k1,362:12224562,40715550:185950
x1,362:13519552,40715550
x1,362:14424603,40715550
k1,362:14610552,40715550:185949
x1,362:15150568,40715550
k1,362:15336518,40715550:185950
x1,362:16653791,40715550
x1,362:18100168,40715550
k1,362:18286117,40715550:185949
x1,362:19585039,40715550
k1,362:19770989,40715550:185950
x1,362:20349016,40715550
k1,362:20534965,40715550:185949
x1,362:21737549,40715550
k1,362:21923499,40715550:185950
x1,362:22501526,40715550
k1,362:22687475,40715550:185949
x1,362:23570243,40715550
k1,362:23756193,40715550:185950
x1,362:25005307,40715550
k1,362:25191256,40715550:185949
x1,362:26928612,40715550
k1,362:27114562,40715550:185950
x1,362:27654578,40715550
k1,362:27840527,40715550:185949
x1,362:29157800,40715550
x1,362:30341378,40715550
k1,362:30527328,40715550:185950
x1,362:30761946,40715550
x1,362:31060134,40715550
x1,362:32326942,40715550
k1,362:32326942,40715550:0
)
(1,363:7947550,41501982:24379392,449576,148438
x1,363:8762817,41501982
x1,363:10417599,41501982
k1,362:10557848,41501982:140249
x1,362:11107694,41501982
x1,362:11405882,41501982
k1,362:11546131,41501982:140249
x1,362:12174620,41501982
x1,362:12734297,41501982
x1,362:14258663,41501982
k1,362:14440861,41501982:182198
x1,362:15490746,41501982
k1,362:15630995,41501982:140249
x1,362:16925985,41501982
x1,362:17831036,41501982
k1,362:17971285,41501982:140249
x1,362:18511301,41501982
k1,362:18651551,41501982:140250
x1,362:19534319,41501982
k1,362:19674568,41501982:140249
x1,362:20991841,41501982
x1,362:22438218,41501982
k1,362:22578467,41501982:140249
x1,362:24038606,41501982
k1,362:24178855,41501982:140249
x1,362:24727391,41501982
x1,362:25244469,41501982
x1,362:25479087,41501982
x1,362:25794314,41501982
x1,362:26274037,41501982
k1,362:26414286,41501982:140249
x1,362:27462862,41501982
k1,362:27603112,41501982:140250
x1,362:28158201,41501982
x1,362:28848949,41501982
k1,362:28989198,41501982:140249
x1,362:30238312,41501982
k1,362:30378561,41501982:140249
x1,362:32326942,41501982
k1,362:32326942,41501982:0
)
(1,363:7947550,42288414:24379392,449576,148438
x1,363:9818600,42288414
k1,362:9962620,42288414:144020
x1,362:10633053,42288414
k1,362:10777072,42288414:144019
x1,362:12852594,42288414
k1,362:12996614,42288414:144020
x1,362:13551703,42288414
k1,362:13695723,42288414:144020
x1,362:14676141,42288414
x1,362:15483542,42288414
x1,362:15781730,42288414
k1,362:15925749,42288414:144019
x1,362:16808517,42288414
k1,362:16952537,42288414:144020
x1,362:17635422,42288414
x1,362:18180025,42288414
x1,362:18794751,42288414
x1,362:18897642,42288414
k1,362:19091151,42288414:193509
x1,362:20353372,42288414
k1,362:20497391,42288414:144019
x1,362:20935826,42288414
x1,362:21089835,42288414
k1,362:21235945,42288414:146110
x1,362:21618674,42288414
k1,362:21762694,42288414:144020
x1,362:23633744,42288414
k1,362:23777763,42288414:144019
x1,362:24448196,42288414
k1,362:24592216,42288414:144020
x1,362:25206288,42288414
x1,362:25887862,42288414
x1,362:26726722,42288414
k1,362:26870742,42288414:144020
x1,362:27410758,42288414
k1,362:27554777,42288414:144019
x1,362:28535195,42288414
x1,362:29107978,42288414
x1,362:29342596,42288414
x1,362:30208980,42288414
k1,362:30353000,42288414:144020
x1,362:30963795,42288414
x1,362:31606702,42288414
x1,362:32090357,42288414
x1,362:32326942,42288414
k1,363:32326942,42288414:0
)
(1,363:7947550,43074846:24379392,449576,148438
x1,363:9313974,43074846
k1,362:9439993,43074846:126019
x1,362:9980009,43074846
k1,362:10106027,43074846:126018
x1,362:10988795,43074846
k1,362:11114814,43074846:126019
x1,362:12879694,43074846
k1,362:13005713,43074846:126019
x1,362:17230160,43074846
k1,362:17356179,43074846:126019
x1,362:17716627,43074846
x1,362:18006950,43074846
k1,362:18132968,43074846:126018
x1,362:19015736,43074846
k1,362:19141755,43074846:126019
x1,362:20390869,43074846
k1,362:20516888,43074846:126019
x1,362:21065424,43074846
x1,362:21582502,43074846
x1,362:21817120,43074846
x1,362:22132347,43074846
x1,362:22823095,43074846
k1,362:22949113,43074846:126018
x1,362:23997689,43074846
k1,362:24123708,43074846:126019
x1,362:24640131,43074846
x1,362:25085120,43074846
x1,362:25625791,43074846
k1,362:25751810,43074846:126019
x1,362:29169510,43074846
k1,362:29295529,43074846:126019
x1,362:29655977,43074846
x1,362:29946300,43074846
k1,362:30072318,43074846:126018
x1,362:30955086,43074846
k1,362:31081105,43074846:126019
x1,362:31636194,43074846
x1,362:32326942,43074846
k1,362:32326942,43074846:0
)
(1,363:7947550,43861278:24379392,449576,148438
x1,363:9196664,43861278
k1,362:9314826,43861278:118162
x1,362:11423115,43861278
k1,362:11585710,43861278:162595
x1,362:12747662,43861278
x1,362:12883321,43861278
k1,362:13004983,43861278:121662
x1,362:13887751,43861278
k1,362:14005913,43861278:118162
x1,362:15300903,43861278
x1,362:16205954,43861278
k1,362:16324116,43861278:118162
x1,362:16864132,43861278
k1,362:16982294,43861278:118162
x1,362:17865062,43861278
k1,362:17983224,43861278:118162
x1,362:19300497,43861278
x1,362:20746874,43861278
k1,362:20865036,43861278:118162
x1,362:21680303,43861278
x1,362:23335085,43861278
k1,362:23453247,43861278:118162
x1,362:25324297,43861278
k1,362:25442459,43861278:118162
x1,362:26112892,43861278
k1,362:26231054,43861278:118162
x1,362:26859543,43861278
x1,362:27419220,43861278
x1,362:29257502,43861278
k1,362:29375664,43861278:118162
x1,362:30093937,43861278
x1,362:30947869,43861278
k1,362:31066031,43861278:118162
x1,362:32326942,43861278
k1,362:32326942,43861278:0
)
(1,363:7947550,44647710:24379392,449576,148438
x1,363:9042654,44647710
k1,362:9179303,44647710:136649
x1,362:9719319,44647710
k1,362:9855968,44647710:136649
x1,362:11147026,44647710
k1,362:11283674,44647710:136648
x1,362:13121302,44647710
k1,362:13257951,44647710:136649
x1,362:14716781,44647710
k1,362:14888178,44647710:171397
x1,362:15347585,44647710
x1,362:15916436,44647710
x1,362:16226421,44647710
x1,362:16461039,44647710
x1,362:17683939,44647710
x1,362:17832050,44647710
k1,362:17968947,44647710:136897
x1,362:18851715,44647710
k1,362:18988364,44647710:136649
x1,362:19671249,44647710
x1,362:20215852,44647710
x1,362:20830578,44647710
k1,362:20967227,44647710:136649
x1,362:21201845,44647710
x1,362:21511174,44647710
x1,362:22241899,44647710
k1,362:22378548,44647710:136649
x1,362:23086992,44647710
x1,362:24828282,44647710
k1,362:24964931,44647710:136649
x1,362:25739565,44647710
k1,362:25876214,44647710:136649
x1,362:27167272,44647710
k1,362:27303920,44647710:136648
x1,362:29141548,44647710
k1,362:29278197,44647710:136649
x1,362:30455222,44647710
k1,362:30591871,44647710:136649
x1,362:31519860,44647710
k1,362:31656509,44647710:136649
x1,362:32326942,44647710
k1,362:32326942,44647710:0
)
]
(1,363:7947550,46613790:24379392,0,0
h1,363:7947550,46613790:24379392,0,0
)
]
]
!52955
}8
!10
{9
[1,363:4736286,46613790:27525120,41877504,0
[1,363:7882014,46613790:24379392,41222144,0
[1,363:7882014,6178078:24379392,786432,0
(1,363:7882014,6800670:24379392,1409024,0
(1,363:7882014,6800670:24379392,1409024,0
[1,363:7882014,6800670:24379392,1409024,0
(1,363:7882014,5457182:24379392,65536,0
h1,363:7882014,5457182:0,0,0
(1,363:7882014,5457182:24379392,65536,0
r1,363:32261406,5457182:24379392,65536,0
)
g1,363:32261406,5457182
g1,363:32261406,5457182
)
(1,363:7882014,6276382:24379392,395657,55410
x1,363:8856344,6276382
g1,363:8985220,6276382
x1,363:9609667,6276382
g1,363:9738543,6276382
x1,363:10534811,6276382
k1,363:12002457,6276382:1467646
x1,363:13352210,6276382
g1,363:13481086,6276382
x1,363:15703699,6276382
g1,363:15832575,6276382
x1,363:16862322,6276382
x1,363:17831683,6276382
x1,363:19289131,6276382
g1,363:19418007,6276382
x1,363:20814454,6276382
x1,363:21831729,6276382
g1,363:21960605,6276382
x1,363:22794852,6276382
g1,363:22923728,6276382
x1,363:23624753,6276382
x1,363:27995267,6276382
g1,363:28124143,6276382
x1,363:28523834,6276382
x1,363:29549223,6276382
g1,363:29678099,6276382
x1,363:29861134,6276382
x1,363:30121370,6276382
x1,363:30381606,6276382
k1,363:31926452,6276382:1467645
x1,363:32261406,6276382
)
(1,363:7882014,6800670:24379392,65536,0
h1,363:7882014,6800670:0,0,0
(1,363:7882014,6800670:24379392,65536,0
r1,363:32261406,6800670:24379392,65536,0
)
g1,363:32261406,6800670
g1,363:32261406,6800670
)
]
)
)
]
[1,363:7882014,44647710:24379392,36831232,0
[1,314:7882014,38960643:24379392,25457098,0
[1,314:7882014,38960643:24379392,25457098,0
(1,311:7882014,21571670:24379392,8068125,0
k1,311:8965213,21571670:1083199
h1,275:8965213,21571670:0,0,0
[1,278:8965213,21571670:7313892,8058724,0
(1,277:8965213,20064342:7313892,6551396,0
h1,276:8965213,20064342:0,0,0
(1,276:8965213,20064342:7313892,6551396,0
(1,276:8965213,20064342:7313397,6551412,0
(1,276:8965213,20064342:7313397,6551412,0
(1,276:8965213,20064342:0,6551412,0
(1,276:8965213,20064342:0,39025029,0
(1,276:8965213,20064342:43563971,39025029,0
)
k1,276:8965212,20064342:-43563972
)
)
g1,276:16278610,20064342
)
)
)
g1,277:16279105,20064342
g1,277:16279105,20064342
)
(1,277:8965213,20962183:7313892,504625,216271
h1,277:8965213,20962183:0,0,0
g1,277:8965213,20962183
[1,277:8965213,20962183:7313892,504625,216271
(1,277:8965213,20962183:7313892,504625,216271
k1,277:10460458,20962183:1495245
h1,277:10460458,20962183:0,0,0
x1,277:11124009,20962183
g1,277:11246102,20962183
r1,277:11246102,20962183:0,720896,216271
g1,277:11246102,20962183
x1,277:12408053,20962183
g1,277:12530146,20962183
x1,277:13042113,20962183
x1,277:13942183,20962183
g1,277:14064276,20962183
x1,277:14783861,20962183
r1,277:14783861,20962183:0,216271,216271
g1,277:14783861,20962183
k1,277:16279105,20962183:1495244
)
]
g1,277:16279105,20962183
g1,277:16279105,20962183
)
]
g1,278:16414764,21571670
[1,282:16414764,21571670:7313892,8058724,0
(1,281:16414764,20064342:7313892,6551396,0
h1,280:16414764,20064342:0,0,0
(1,280:16414764,20064342:7313892,6551396,0
(1,280:16414764,20064342:7313397,6551412,0
(1,280:16414764,20064342:7313397,6551412,0
(1,280:16414764,20064342:0,6551412,0
(1,280:16414764,20064342:0,39025029,0
(1,280:16414764,20064342:43563971,39025029,0
)
k1,280:16414763,20064342:-43563972
)
)
g1,280:23728161,20064342
)
)
)
g1,281:23728656,20064342
g1,281:23728656,20064342
)
(1,281:16414764,20962183:7313892,504625,216271
h1,281:16414764,20962183:0,0,0
g1,281:16414764,20962183
[1,281:16414764,20962183:7313892,504625,216271
(1,281:16414764,20962183:7313892,504625,216271
k1,281:17889660,20962183:1474896
h1,281:17889660,20962183:0,0,0
x1,281:18593909,20962183
g1,281:18716002,20962183
r1,281:18716002,20962183:0,720896,216271
g1,281:18716002,20962183
x1,281:19877953,20962183
g1,281:20000046,20962183
x1,281:20512013,20962183
x1,281:21412083,20962183
g1,281:21534176,20962183
x1,281:22253761,20962183
r1,281:22253761,20962183:0,216271,216271
g1,281:22253761,20962183
k1,281:23728656,20962183:1474895
)
]
g1,281:23728656,20962183
g1,281:23728656,20962183
)
]
g1,282:23864315,21571670
[1,286:23864315,21571670:7313892,8068125,0
(1,285:23864315,20064342:7313892,6560797,0
h1,284:23864315,20064342:0,0,0
(1,284:23864315,20064342:7313892,6560797,0
(1,284:23864315,20064342:7313693,6560813,0
(1,284:23864315,20064342:7313693,6560813,0
(1,284:23864315,20064342:0,6560813,0
(1,284:23864315,20064342:0,39123702,0
(1,284:23864315,20064342:43613307,39123702,0
)
k1,284:23864314,20064342:-43613308
)
)
g1,284:31178008,20064342
)
)
)
g1,285:31178207,20064342
g1,285:31178207,20064342
)
(1,285:23864315,20962183:7313892,504625,216271
h1,285:23864315,20962183:0,0,0
g1,285:23864315,20962183
[1,285:23864315,20962183:7313892,504625,216271
(1,285:23864315,20962183:7313892,504625,216271
k1,285:25366933,20962183:1502618
h1,285:25366933,20962183:0,0,0
x1,285:26015738,20962183
g1,285:26137831,20962183
r1,285:26137831,20962183:0,720896,216271
g1,285:26137831,20962183
x1,285:27299782,20962183
g1,285:27421875,20962183
x1,285:27933842,20962183
x1,285:28833912,20962183
g1,285:28956005,20962183
x1,285:29675590,20962183
r1,285:29675590,20962183:0,216271,216271
g1,285:29675590,20962183
k1,285:31178207,20962183:1502617
)
]
g1,285:31178207,20962183
g1,285:31178207,20962183
)
]
k1,286:32261406,21571670:1083199
)
(1,311:7882014,29685913:24379392,8048707,0
k1,311:8965213,29685913:1083199
[1,290:8965213,29685913:7313892,8048707,0
(1,289:8965213,28178585:7313892,6541379,0
h1,288:8965213,28178585:0,0,0
(1,288:8965213,28178585:7313892,6541379,0
(1,288:8965213,28178585:7313413,6541395,0
(1,288:8965213,28178585:7313413,6541395,0
(1,288:8965213,28178585:0,6541395,0
(1,288:8965213,28178585:0,38877020,0
(1,288:8965213,28178585:43465298,38877020,0
)
k1,288:8965215,28178585:-43465296
)
)
g1,288:16278626,28178585
)
)
)
g1,289:16279105,28178585
g1,289:16279105,28178585
)
(1,289:8965213,29076426:7313892,504625,216271
h1,289:8965213,29076426:0,0,0
g1,289:8965213,29076426
[1,289:8965213,29076426:7313892,504625,216271
(1,289:8965213,29076426:7313892,504625,216271
k1,289:10440109,29076426:1474896
h1,289:10440109,29076426:0,0,0
x1,289:11144358,29076426
g1,289:11266451,29076426
r1,289:11266451,29076426:0,720896,216271
g1,289:11266451,29076426
x1,289:12428402,29076426
g1,289:12550495,29076426
x1,289:13062462,29076426
x1,289:13962532,29076426
g1,289:14084625,29076426
x1,289:14804210,29076426
r1,289:14804210,29076426:0,216271,216271
g1,289:14804210,29076426
k1,289:16279105,29076426:1474895
)
]
g1,289:16279105,29076426
g1,289:16279105,29076426
)
]
g1,290:16414764,29685913
[1,294:16414764,29685913:7313892,8018485,0
(1,293:16414764,28178585:7313892,6511157,0
h1,292:16414764,28178585:0,0,0
(1,292:16414764,28178585:7313892,6511157,0
(1,292:16414764,28178585:7313693,6511173,0
(1,292:16414764,28178585:7313693,6511173,0
(1,292:16414764,28178585:0,6511173,0
(1,292:16414764,28178585:0,38827684,0
(1,292:16414764,28178585:43613307,38827684,0
)
k1,292:16414763,28178585:-43613308
)
)
g1,292:23728457,28178585
)
)
)
g1,293:23728656,28178585
g1,293:23728656,28178585
)
(1,293:16414764,29076426:7313892,504625,216271
h1,293:16414764,29076426:0,0,0
g1,293:16414764,29076426
[1,293:16414764,29076426:7313892,504625,216271
(1,293:16414764,29076426:7313892,504625,216271
k1,293:17912368,29076426:1497604
h1,293:17912368,29076426:0,0,0
x1,293:18571200,29076426
g1,293:18693293,29076426
r1,293:18693293,29076426:0,720896,216271
g1,293:18693293,29076426
x1,293:19855244,29076426
g1,293:19977337,29076426
x1,293:20489304,29076426
x1,293:21389374,29076426
g1,293:21511467,29076426
x1,293:22231052,29076426
r1,293:22231052,29076426:0,216271,216271
g1,293:22231052,29076426
k1,293:23728656,29076426:1497604
)
]
g1,293:23728656,29076426
g1,293:23728656,29076426
)
]
g1,294:23864315,29685913
[1,298:23864315,29685913:7313892,8021937,0
(1,297:23864315,28178585:7313892,6514609,0
h1,296:23864315,28178585:0,0,0
(1,296:23864315,28178585:7313892,6514609,0
(1,296:23864315,28178585:7313353,6514625,0
(1,296:23864315,28178585:7313353,6514625,0
(1,296:23864315,28178585:0,6514625,0
(1,296:23864315,28178585:0,38630339,0
(1,296:23864315,28178585:43366625,38630339,0
)
k1,296:23864316,28178585:-43366624
)
)
g1,296:31177668,28178585
)
)
)
g1,297:31178207,28178585
g1,297:31178207,28178585
)
(1,297:23864315,29076426:7313892,504625,216271
h1,297:23864315,29076426:0,0,0
g1,297:23864315,29076426
[1,297:23864315,29076426:7313892,504625,216271
(1,297:23864315,29076426:7313892,504625,216271
k1,297:25387872,29076426:1523557
h1,297:25387872,29076426:0,0,0
x1,297:25750613,29076426
x1,297:25994799,29076426
g1,297:26116892,29076426
r1,297:26116892,29076426:0,720896,216271
g1,297:26116892,29076426
x1,297:27278843,29076426
g1,297:27400936,29076426
x1,297:27912903,29076426
x1,297:28812973,29076426
g1,297:28935066,29076426
x1,297:29654651,29076426
r1,297:29654651,29076426:0,216271,216271
g1,297:29654651,29076426
k1,297:31178207,29076426:1523556
)
]
g1,297:31178207,29076426
g1,297:31178207,29076426
)
]
k1,298:32261406,29685913:1083199
)
(1,311:7882014,37780995:24379392,8029546,0
k1,311:8965213,37780995:1083199
[1,302:8965213,37780995:7313892,8025594,0
(1,301:8965213,36273667:7313892,6518266,0
h1,300:8965213,36273667:0,0,0
(1,300:8965213,36273667:7313892,6518266,0
(1,300:8965213,36273667:7313397,6518282,0
(1,300:8965213,36273667:7313397,6518282,0
(1,300:8965213,36273667:0,6518282,0
(1,300:8965213,36273667:0,38827684,0
(1,300:8965213,36273667:43563971,38827684,0
)
k1,300:8965212,36273667:-43563972
)
)
g1,300:16278610,36273667
)
)
)
g1,301:16279105,36273667
g1,301:16279105,36273667
)
(1,301:8965213,37171508:7313892,504625,216271
h1,301:8965213,37171508:0,0,0
g1,301:8965213,37171508
[1,301:8965213,37171508:7313892,504625,216271
(1,301:8965213,37171508:7313892,504625,216271
k1,301:10461343,37171508:1496130
h1,301:10461343,37171508:0,0,0
x1,301:11123124,37171508
g1,301:11245217,37171508
r1,301:11245217,37171508:0,720896,216271
g1,301:11245217,37171508
x1,301:12407168,37171508
g1,301:12529261,37171508
x1,301:13041228,37171508
x1,301:13941298,37171508
g1,301:14063391,37171508
x1,301:14782976,37171508
r1,301:14782976,37171508:0,216271,216271
g1,301:14782976,37171508
k1,301:16279105,37171508:1496129
)
]
g1,301:16279105,37171508
g1,301:16279105,37171508
)
]
g1,302:16414764,37780995
[1,306:16414764,37780995:7313892,8029546,0
(1,305:16414764,36273667:7313892,6522218,0
h1,304:16414764,36273667:0,0,0
(1,304:16414764,36273667:7313892,6522218,0
(1,304:16414764,36273667:7313807,6522234,0
(1,304:16414764,36273667:7313807,6522234,0
(1,304:16414764,36273667:0,6522234,0
(1,304:16414764,36273667:0,39025029,0
(1,304:16414764,36273667:43761316,39025029,0
)
k1,304:16414764,36273667:-43761316
)
)
g1,304:23728571,36273667
)
)
)
g1,305:23728656,36273667
g1,305:23728656,36273667
)
(1,305:16414764,37171508:7313892,504625,216271
h1,305:16414764,37171508:0,0,0
g1,305:16414764,37171508
[1,305:16414764,37171508:7313892,504625,216271
(1,305:16414764,37171508:7313892,504625,216271
k1,305:17887301,37171508:1472537
h1,305:17887301,37171508:0,0,0
x1,305:18596268,37171508
g1,305:18718361,37171508
r1,305:18718361,37171508:0,720896,216271
g1,305:18718361,37171508
x1,305:19880312,37171508
g1,305:20002405,37171508
x1,305:20514372,37171508
x1,305:21414442,37171508
g1,305:21536535,37171508
x1,305:22256120,37171508
r1,305:22256120,37171508:0,216271,216271
g1,305:22256120,37171508
k1,305:23728656,37171508:1472536
)
]
g1,305:23728656,37171508
g1,305:23728656,37171508
)
]
g1,306:23864315,37780995
[1,310:23864315,37780995:7313892,8017312,0
(1,309:23864315,36273667:7313892,6509984,0
h1,308:23864315,36273667:0,0,0
(1,308:23864315,36273667:7313892,6509984,0
(1,308:23864315,36273667:7313397,6510000,0
(1,308:23864315,36273667:7313397,6510000,0
(1,308:23864315,36273667:0,6510000,0
(1,308:23864315,36273667:0,38778348,0
(1,308:23864315,36273667:43563971,38778348,0
)
k1,308:23864314,36273667:-43563972
)
)
g1,308:31177712,36273667
)
)
)
g1,309:31178207,36273667
g1,309:31178207,36273667
)
(1,309:23864315,37171508:7313892,504625,216271
h1,309:23864315,37171508:0,0,0
g1,309:23864315,37171508
[1,309:23864315,37171508:7313892,504625,216271
(1,309:23864315,37171508:7313892,504625,216271
k1,309:25631176,37171508:1766861
h1,309:25631176,37171508:0,0,0
x1,309:26169094,37171508
g1,309:26291187,37171508
r1,309:26291187,37171508:0,720896,216271
g1,309:26291187,37171508
x1,309:26635644,37171508
x1,309:26876881,37171508
x1,309:27364073,37171508
x1,309:28203390,37171508
g1,309:28325483,37171508
x1,309:29411347,37171508
r1,309:29411347,37171508:0,216271,216271
g1,309:29411347,37171508
k1,309:31178207,37171508:1766860
)
]
g1,309:31178207,37171508
g1,309:31178207,37171508
)
]
g1,311:31178207,37780995
k1,311:32261406,37780995:1083199
)
(1,312:7882014,38331495:24379392,550500,235932
h1,312:7882014,38331495:0,0,0
g1,312:7882014,38331495
[1,312:7882014,38331495:24379392,550500,235932
(1,312:7882014,38331495:24379392,550500,235932
k1,312:13621013,38331495:5738999
h1,312:13621013,38331495:0,0,0
x1,312:13970975,38331495
x1,312:15054281,38331495
x1,312:15352469,38331495
g1,312:15488128,38331495
x1,312:15967851,38331495
g1,312:16136278,38331495
r1,312:16136278,38331495:0,786432,235932
g1,312:16136278,38331495
x1,312:17427336,38331495
g1,312:17562995,38331495
x1,312:19400623,38331495
g1,312:19536282,38331495
x1,312:20076298,38331495
g1,312:20211957,38331495
x1,312:21094725,38331495
g1,312:21230384,38331495
x1,312:24036631,38331495
g1,312:24172290,38331495
x1,312:26398545,38331495
x1,312:26522408,38331495
r1,312:26522408,38331495:0,235932,235932
g1,312:26522408,38331495
k1,312:32261406,38331495:5738998
)
]
g1,312:32261406,38331495
g1,312:32261406,38331495
)
]
]
]
(1,363:7882014,46613790:24379392,0,0
h1,363:7882014,46613790:24379392,0,0
)
]
]
!13682
}9
!10
{10
[1,363:4736286,46613790:27590656,41877504,0
[1,363:7947550,46613790:24379392,41222144,0
[1,363:7947550,6178078:24379392,786432,0
(1,363:7947550,6800670:24379392,1409024,0
(1,363:7947550,6800670:24379392,1409024,0
[1,363:7947550,6800670:24379392,1409024,0
(1,363:7947550,5457182:24379392,65536,0
h1,363:7947550,5457182:0,0,0
(1,363:7947550,5457182:24379392,65536,0
r1,363:32326942,5457182:24379392,65536,0
)
g1,363:32326942,5457182
g1,363:32326942,5457182
)
(1,363:7947550,6276382:24379392,395657,4046
x1,363:8617458,6276382
k1,363:32326942,6276382:23709484
)
(1,363:7947550,6276382:24379392,395657,68796
(1,363:7947550,6276382:24379392,395657,68796
k1,363:16323621,6276382:8376071
x1,363:17415634,6276382
g1,363:17544510,6276382
x1,363:18574257,6276382
x1,363:19653817,6276382
x1,363:21488556,6276382
g1,363:21617432,6276382
x1,363:23950872,6276382
k1,363:32326942,6276382:8376070
)
)
(1,363:7947550,6800670:24379392,65536,0
h1,363:7947550,6800670:0,0,0
(1,363:7947550,6800670:24379392,65536,0
r1,363:32326942,6800670:24379392,65536,0
)
g1,363:32326942,6800670
g1,363:32326942,6800670
)
]
)
)
]
[1,363:7947550,44647710:24379392,36831232,0
[1,338:7947550,36589872:24379392,20715556,0
[1,338:7947550,36589872:24379392,20715556,0
(1,336:7947550,25609502:24379392,9735186,0
k1,336:9098765,25609502:1151215
h1,320:9098765,25609502:0,0,0
[1,323:9098765,25609502:10970652,9735186,0
(1,322:9098765,24102174:10970652,8227858,0
h1,321:9098765,24102174:0,0,0
(1,321:9098765,24102174:10970652,8227858,0
(1,321:9098765,24102174:10970505,8227879,0
(1,321:9098765,24102174:10970505,8227879,0
(1,321:9098765,24102174:0,8227879,0
(1,321:9098765,24102174:0,27628339,0
(1,321:9098765,24102174:36837786,27628339,0
)
k1,321:9098767,24102174:-36837784
)
)
g1,321:20069270,24102174
)
)
)
g1,322:20069417,24102174
g1,322:20069417,24102174
)
(1,322:9098765,25000015:10970652,504625,216271
h1,322:9098765,25000015:0,0,0
g1,322:9098765,25000015
[1,322:9098765,25000015:10970652,504625,216271
(1,322:9098765,25000015:10970652,504625,216271
k1,322:11239796,25000015:2141031
h1,322:11239796,25000015:0,0,0
x1,322:11903347,25000015
g1,322:12025440,25000015
r1,322:12025440,25000015:0,720896,216271
g1,322:12025440,25000015
x1,322:12362229,25000015
x1,322:13941774,25000015
x1,322:14371754,25000015
g1,322:14493847,25000015
x1,322:15354988,25000015
x1,322:17086708,25000015
g1,322:17208801,25000015
x1,322:17928386,25000015
r1,322:17928386,25000015:0,216271,216271
g1,322:17928386,25000015
k1,322:20069417,25000015:2141031
)
]
g1,322:20069417,25000015
g1,322:20069417,25000015
)
]
g1,323:20205076,25609502
[1,327:20205076,25609502:10970652,9735186,0
(1,326:20205076,24102174:10970652,8227858,0
h1,325:20205076,24102174:0,0,0
(1,325:20205076,24102174:10970652,8227858,0
(1,325:20205076,24102174:10970505,8227879,0
(1,325:20205076,24102174:10970505,8227879,0
(1,325:20205076,24102174:0,8227879,0
(1,325:20205076,24102174:0,27628339,0
(1,325:20205076,24102174:36837786,27628339,0
)
k1,325:20205078,24102174:-36837784
)
)
g1,325:31175581,24102174
)
)
)
g1,326:31175728,24102174
g1,326:31175728,24102174
)
(1,326:20205076,25000015:10970652,504625,216271
h1,326:20205076,25000015:0,0,0
g1,326:20205076,25000015
[1,326:20205076,25000015:10970652,504625,216271
(1,326:20205076,25000015:10970652,504625,216271
k1,326:22325758,25000015:2120682
h1,326:22325758,25000015:0,0,0
x1,326:23030007,25000015
g1,326:23152100,25000015
r1,326:23152100,25000015:0,720896,216271
g1,326:23152100,25000015
x1,326:23488889,25000015
x1,326:25068434,25000015
x1,326:25498414,25000015
g1,326:25620507,25000015
x1,326:26481648,25000015
x1,326:28213368,25000015
g1,326:28335461,25000015
x1,326:29055046,25000015
r1,326:29055046,25000015:0,216271,216271
g1,326:29055046,25000015
k1,326:31175728,25000015:2120682
)
]
g1,326:31175728,25000015
g1,326:31175728,25000015
)
]
k1,327:32326942,25609502:1151214
)
(1,336:7947550,35410224:24379392,9735186,0
k1,336:9098765,35410224:1151215
[1,331:9098765,35410224:10970652,9735186,0
(1,330:9098765,33902896:10970652,8227858,0
h1,329:9098765,33902896:0,0,0
(1,329:9098765,33902896:10970652,8227858,0
(1,329:9098765,33902896:10970505,8227879,0
(1,329:9098765,33902896:10970505,8227879,0
(1,329:9098765,33902896:0,8227879,0
(1,329:9098765,33902896:0,27628339,0
(1,329:9098765,33902896:36837786,27628339,0
)
k1,329:9098767,33902896:-36837784
)
)
g1,329:20069270,33902896
)
)
)
g1,330:20069417,33902896
g1,330:20069417,33902896
)
(1,330:9098765,34800737:10970652,504625,216271
h1,330:9098765,34800737:0,0,0
g1,330:9098765,34800737
[1,330:9098765,34800737:10970652,504625,216271
(1,330:9098765,34800737:10970652,504625,216271
k1,330:11247169,34800737:2148404
h1,330:11247169,34800737:0,0,0
x1,330:11895974,34800737
g1,330:12018067,34800737
r1,330:12018067,34800737:0,720896,216271
g1,330:12018067,34800737
x1,330:12354856,34800737
x1,330:13934401,34800737
x1,330:14364381,34800737
g1,330:14486474,34800737
x1,330:15347615,34800737
x1,330:17079335,34800737
g1,330:17201428,34800737
x1,330:17921013,34800737
r1,330:17921013,34800737:0,216271,216271
g1,330:17921013,34800737
k1,330:20069417,34800737:2148404
)
]
g1,330:20069417,34800737
g1,330:20069417,34800737
)
]
g1,331:20205076,35410224
[1,335:20205076,35410224:10970652,9735186,0
(1,334:20205076,33902896:10970652,8227858,0
h1,333:20205076,33902896:0,0,0
(1,333:20205076,33902896:10970652,8227858,0
(1,333:20205076,33902896:10970505,8227879,0
(1,333:20205076,33902896:10970505,8227879,0
(1,333:20205076,33902896:0,8227879,0
(1,333:20205076,33902896:0,27628339,0
(1,333:20205076,33902896:36837786,27628339,0
)
k1,333:20205078,33902896:-36837784
)
)
g1,333:31175581,33902896
)
)
)
g1,334:31175728,33902896
g1,334:31175728,33902896
)
(1,334:20205076,34800737:10970652,504625,216271
h1,334:20205076,34800737:0,0,0
g1,334:20205076,34800737
[1,334:20205076,34800737:10970652,504625,216271
(1,334:20205076,34800737:10970652,504625,216271
k1,334:22325758,34800737:2120682
h1,334:22325758,34800737:0,0,0
x1,334:23030007,34800737
g1,334:23152100,34800737
r1,334:23152100,34800737:0,720896,216271
g1,334:23152100,34800737
x1,334:23488889,34800737
x1,334:25068434,34800737
x1,334:25498414,34800737
g1,334:25620507,34800737
x1,334:26481648,34800737
x1,334:28213368,34800737
g1,334:28335461,34800737
x1,334:29055046,34800737
r1,334:29055046,34800737:0,216271,216271
g1,334:29055046,34800737
k1,334:31175728,34800737:2120682
)
]
g1,334:31175728,34800737
g1,334:31175728,34800737
)
]
g1,336:31175728,35410224
k1,336:32326942,35410224:1151214
)
(1,336:7947550,35960724:24379392,550500,235932
h1,336:7947550,35960724:0,0,0
g1,336:7947550,35960724
[1,336:7947550,35960724:24379392,550500,235932
(1,336:7947550,35960724:24379392,550500,235932
k1,336:11729645,35960724:3782095
h1,336:11729645,35960724:0,0,0
x1,336:12079607,35960724
x1,336:13162913,35960724
x1,336:13461101,35960724
g1,336:13596760,35960724
x1,336:14076483,35960724
g1,336:14244910,35960724
r1,336:14244910,35960724:0,786432,235932
g1,336:14244910,35960724
x1,336:14657131,35960724
x1,336:15904279,35960724
x1,336:17091134,35960724
g1,336:17226793,35960724
x1,336:18275369,35960724
g1,336:18411028,35960724
x1,336:19741409,35960724
x1,336:21294610,35960724
x1,336:22481465,35960724
g1,336:22617124,35960724
x1,336:24639562,35960724
x1,336:25117318,35960724
g1,336:25252977,35960724
x1,336:26209802,35960724
x1,336:28396736,35960724
x1,336:28544847,35960724
r1,336:28544847,35960724:0,235932,235932
g1,336:28544847,35960724
k1,336:32326942,35960724:3782095
)
]
g1,336:32326942,35960724
g1,336:32326942,35960724
)
]
]
]
(1,363:7947550,46613790:24379392,0,0
h1,363:7947550,46613790:24379392,0,0
)
]
]
!7574
}10
!10
{11
[1,363:4736286,46613790:27525120,41877504,0
[1,363:7882014,46613790:24379392,41222144,0
[1,363:7882014,6178078:24379392,786432,0
(1,363:7882014,6800670:24379392,1409024,0
(1,363:7882014,6800670:24379392,1409024,0
[1,363:7882014,6800670:24379392,1409024,0
(1,363:7882014,5457182:24379392,65536,0
h1,363:7882014,5457182:0,0,0
(1,363:7882014,5457182:24379392,65536,0
r1,363:32261406,5457182:24379392,65536,0
)
g1,363:32261406,5457182
g1,363:32261406,5457182
)
(1,363:7882014,6276382:24379392,395657,55410
x1,363:8856344,6276382
g1,363:8985220,6276382
x1,363:9609667,6276382
g1,363:9738543,6276382
x1,363:10534811,6276382
k1,363:11834980,6276382:1300169
x1,363:13184733,6276382
g1,363:13313609,6276382
x1,363:15536222,6276382
g1,363:15665098,6276382
x1,363:16694845,6276382
x1,363:17664206,6276382
x1,363:19121654,6276382
g1,363:19250530,6276382
x1,363:20646977,6276382
x1,363:21664252,6276382
g1,363:21793128,6276382
x1,363:22627375,6276382
g1,363:22756251,6276382
x1,363:23457276,6276382
x1,363:27827790,6276382
g1,363:27956666,6276382
x1,363:28356357,6276382
x1,363:29381746,6276382
g1,363:29510622,6276382
x1,363:29693657,6276382
x1,363:29953893,6276382
x1,363:30214129,6276382
k1,363:31591498,6276382:1300168
x1,363:32261406,6276382
)
(1,363:7882014,6800670:24379392,65536,0
h1,363:7882014,6800670:0,0,0
(1,363:7882014,6800670:24379392,65536,0
r1,363:32261406,6800670:24379392,65536,0
)
g1,363:32261406,6800670
g1,363:32261406,6800670
)
]
)
)
]
[1,363:7882014,44647710:24379392,36831232,0
[1,360:7882014,37310768:24379392,22157348,0
[1,360:7882014,37310768:24379392,22157348,0
(1,358:7882014,25609502:24379392,10456082,0
k1,358:9033229,25609502:1151215
h1,342:9033229,25609502:0,0,0
[1,345:9033229,25609502:10970652,10456082,0
(1,344:9033229,23381278:10970652,8227858,0
h1,343:9033229,23381278:0,0,0
(1,343:9033229,23381278:10970652,8227858,0
(1,343:9033229,23381278:10970505,8227879,0
(1,343:9033229,23381278:10970505,8227879,0
(1,343:9033229,23381278:0,8227879,0
(1,343:9033229,23381278:0,27628339,0
(1,343:9033229,23381278:36837786,27628339,0
)
k1,343:9033231,23381278:-36837784
)
)
g1,343:20003734,23381278
)
)
)
g1,344:20003881,23381278
g1,344:20003881,23381278
)
(1,344:9033229,25000015:10970652,1225521,216271
h1,344:9033229,25000015:0,0,0
g1,344:9033229,25000015
[1,344:9033229,25000015:10970652,1225521,216271
(1,344:9033229,24279119:10970652,504625,121503
h1,344:9033229,24279119:0,0,0
x1,344:9696780,24279119
k1,344:10090916,24279119:394136
r1,344:10090916,24279119:0,626128,121503
k1,344:10090916,24279119:0
x1,344:10427705,24279119
x1,344:11153187,24279119
x1,344:11796094,24279119
x1,344:12007250,24279119
x1,344:12437230,24279119
k1,344:12831366,24279119:394136
x1,344:13413521,24279119
x1,344:13692507,24279119
x1,344:14196216,24279119
x1,344:15660746,24279119
k1,344:16054882,24279119:394136
x1,344:17512924,24279119
k1,344:17907060,24279119:394136
x1,344:18510449,24279119
x1,344:19113838,24279119
x1,344:20003881,24279119
k1,344:20003881,24279119:0
)
(1,344:9033229,25000015:10970652,404619,216271
x1,344:9545196,25000015
x1,344:10681785,25000015
g1,344:10803878,25000015
x1,344:11091712,25000015
g1,344:11213805,25000015
x1,344:12157523,25000015
g1,344:12279616,25000015
x1,344:12711367,25000015
r1,344:12711367,25000015:0,216271,216271
k1,344:20003881,25000015:7292514
g1,344:20003881,25000015
)
]
g1,344:20003881,25000015
g1,344:20003881,25000015
)
]
g1,345:20139540,25609502
[1,349:20139540,25609502:10970652,10456082,0
(1,348:20139540,23381278:10970652,8227858,0
h1,347:20139540,23381278:0,0,0
(1,347:20139540,23381278:10970652,8227858,0
(1,347:20139540,23381278:10970505,8227879,0
(1,347:20139540,23381278:10970505,8227879,0
(1,347:20139540,23381278:0,8227879,0
(1,347:20139540,23381278:0,27628339,0
(1,347:20139540,23381278:36837786,27628339,0
)
k1,347:20139542,23381278:-36837784
)
)
g1,347:31110045,23381278
)
)
)
g1,348:31110192,23381278
g1,348:31110192,23381278
)
(1,348:20139540,25000015:10970652,1225521,216271
h1,348:20139540,25000015:0,0,0
g1,348:20139540,25000015
[1,348:20139540,25000015:10970652,1225521,216271
(1,348:20139540,24279119:10970652,504625,121503
h1,348:20139540,24279119:0,0,0
x1,348:20843789,24279119
k1,348:21227751,24279119:383962
r1,348:21227751,24279119:0,626128,121503
k1,348:21227751,24279119:0
x1,348:21564540,24279119
x1,348:22290022,24279119
x1,348:22932929,24279119
x1,348:23144085,24279119
x1,348:23574065,24279119
k1,348:23958026,24279119:383961
x1,348:24540181,24279119
x1,348:24819167,24279119
x1,348:25322876,24279119
x1,348:26787406,24279119
k1,348:27171368,24279119:383962
x1,348:28629410,24279119
k1,348:29013371,24279119:383961
x1,348:29616760,24279119
x1,348:30220149,24279119
x1,348:31110192,24279119
k1,348:31110192,24279119:0
)
(1,348:20139540,25000015:10970652,404619,216271
x1,348:20651507,25000015
x1,348:21788096,25000015
g1,348:21910189,25000015
x1,348:22198023,25000015
g1,348:22320116,25000015
x1,348:23263834,25000015
g1,348:23385927,25000015
x1,348:23817678,25000015
r1,348:23817678,25000015:0,216271,216271
k1,348:31110192,25000015:7292514
g1,348:31110192,25000015
)
]
g1,348:31110192,25000015
g1,348:31110192,25000015
)
]
k1,349:32261406,25609502:1151214
)
(1,358:7882014,36131120:24379392,10456082,0
k1,358:9033229,36131120:1151215
[1,353:9033229,36131120:10970652,10456082,0
(1,352:9033229,33902896:10970652,8227858,0
h1,351:9033229,33902896:0,0,0
(1,351:9033229,33902896:10970652,8227858,0
(1,351:9033229,33902896:10970505,8227879,0
(1,351:9033229,33902896:10970505,8227879,0
(1,351:9033229,33902896:0,8227879,0
(1,351:9033229,33902896:0,27628339,0
(1,351:9033229,33902896:36837786,27628339,0
)
k1,351:9033231,33902896:-36837784
)
)
g1,351:20003734,33902896
)
)
)
g1,352:20003881,33902896
g1,352:20003881,33902896
)
(1,352:9033229,35521633:10970652,1225521,216271
h1,352:9033229,35521633:0,0,0
g1,352:9033229,35521633
[1,352:9033229,35521633:10970652,1225521,216271
(1,352:9033229,34800737:10970652,504625,121503
h1,352:9033229,34800737:0,0,0
x1,352:9682034,34800737
k1,352:10079857,34800737:397823
r1,352:10079857,34800737:0,626128,121503
k1,352:10079857,34800737:0
x1,352:10416646,34800737
x1,352:11142128,34800737
x1,352:11785035,34800737
x1,352:11996191,34800737
x1,352:12426171,34800737
k1,352:12823993,34800737:397822
x1,352:13406148,34800737
x1,352:13685134,34800737
x1,352:14188843,34800737
x1,352:15653373,34800737
k1,352:16051196,34800737:397823
x1,352:17509238,34800737
k1,352:17907060,34800737:397822
x1,352:18510449,34800737
x1,352:19113838,34800737
x1,352:20003881,34800737
k1,352:20003881,34800737:0
)
(1,352:9033229,35521633:10970652,404619,216271
x1,352:9545196,35521633
x1,352:10681785,35521633
g1,352:10803878,35521633
x1,352:11091712,35521633
g1,352:11213805,35521633
x1,352:12157523,35521633
g1,352:12279616,35521633
x1,352:12711367,35521633
r1,352:12711367,35521633:0,216271,216271
k1,352:20003881,35521633:7292514
g1,352:20003881,35521633
)
]
g1,352:20003881,35521633
g1,352:20003881,35521633
)
]
g1,353:20139540,36131120
[1,357:20139540,36131120:10970652,10456082,0
(1,356:20139540,33902896:10970652,8227858,0
h1,355:20139540,33902896:0,0,0
(1,355:20139540,33902896:10970652,8227858,0
(1,355:20139540,33902896:10970505,8227879,0
(1,355:20139540,33902896:10970505,8227879,0
(1,355:20139540,33902896:0,8227879,0
(1,355:20139540,33902896:0,27628339,0
(1,355:20139540,33902896:36837786,27628339,0
)
k1,355:20139542,33902896:-36837784
)
)
g1,355:31110045,33902896
)
)
)
g1,356:31110192,33902896
g1,356:31110192,33902896
)
(1,356:20139540,35521633:10970652,1225521,216271
h1,356:20139540,35521633:0,0,0
g1,356:20139540,35521633
[1,356:20139540,35521633:10970652,1225521,216271
(1,356:20139540,34800737:10970652,504625,121503
h1,356:20139540,34800737:0,0,0
x1,356:20843789,34800737
k1,356:21227751,34800737:383962
r1,356:21227751,34800737:0,626128,121503
k1,356:21227751,34800737:0
x1,356:21564540,34800737
x1,356:22290022,34800737
x1,356:22932929,34800737
x1,356:23144085,34800737
x1,356:23574065,34800737
k1,356:23958026,34800737:383961
x1,356:24540181,34800737
x1,356:24819167,34800737
x1,356:25322876,34800737
x1,356:26787406,34800737
k1,356:27171368,34800737:383962
x1,356:28629410,34800737
k1,356:29013371,34800737:383961
x1,356:29616760,34800737
x1,356:30220149,34800737
x1,356:31110192,34800737
k1,356:31110192,34800737:0
)
(1,356:20139540,35521633:10970652,404619,216271
x1,356:20651507,35521633
x1,356:21788096,35521633
g1,356:21910189,35521633
x1,356:22198023,35521633
g1,356:22320116,35521633
x1,356:23263834,35521633
g1,356:23385927,35521633
x1,356:23817678,35521633
r1,356:23817678,35521633:0,216271,216271
k1,356:31110192,35521633:7292514
g1,356:31110192,35521633
)
]
g1,356:31110192,35521633
g1,356:31110192,35521633
)
]
g1,358:31110192,36131120
k1,358:32261406,36131120:1151214
)
(1,358:7882014,36681620:24379392,550500,235932
h1,358:7882014,36681620:0,0,0
g1,358:7882014,36681620
[1,358:7882014,36681620:24379392,550500,235932
(1,358:7882014,36681620:24379392,550500,235932
k1,358:12198227,36681620:4316213
h1,358:12198227,36681620:0,0,0
x1,358:12548189,36681620
x1,358:13631495,36681620
x1,358:13929683,36681620
g1,358:14065342,36681620
x1,358:14545065,36681620
g1,358:14713492,36681620
r1,358:14713492,36681620:0,786432,235932
g1,358:14713492,36681620
x1,358:15087702,36681620
x1,358:16842753,36681620
x1,358:17320509,36681620
g1,358:17456168,36681620
x1,358:18412993,36681620
x1,358:20599927,36681620
g1,358:20735586,36681620
x1,358:22355634,36681620
g1,358:22491293,36681620
x1,358:24397078,36681620
g1,358:24532737,36681620
x1,358:25823795,36681620
g1,358:25959454,36681620
x1,358:27797082,36681620
x1,358:27945193,36681620
r1,358:27945193,36681620:0,235932,235932
g1,358:27945193,36681620
k1,358:32261406,36681620:4316213
)
]
g1,358:32261406,36681620
g1,358:32261406,36681620
)
]
]
]
(1,363:7882014,46613790:24379392,0,0
h1,363:7882014,46613790:24379392,0,0
)
]
]
!9802
}11
!10
{12
[1,473:4736286,46613790:27590656,41877504,0
[1,473:7947550,46613790:24379392,41222144,0
[1,473:7947550,6178078:24379392,786432,0
(1,473:7947550,6800670:24379392,1409024,0
(1,473:7947550,6800670:24379392,1409024,0
[1,473:7947550,6800670:24379392,1409024,0
(1,473:7947550,5457182:24379392,65536,0
h1,473:7947550,5457182:0,0,0
(1,473:7947550,5457182:24379392,65536,0
r1,473:32326942,5457182:24379392,65536,0
)
g1,473:32326942,5457182
g1,473:32326942,5457182
)
(1,473:7947550,6276382:24379392,395657,0
x1,473:8617458,6276382
k1,473:32326942,6276382:23709484
)
(1,473:7947550,6276382:24379392,395657,68796
(1,473:7947550,6276382:24379392,395657,68796
k1,473:16323621,6276382:8376071
x1,473:17415634,6276382
g1,473:17544510,6276382
x1,473:18574257,6276382
x1,473:19653817,6276382
x1,473:21488556,6276382
g1,473:21617432,6276382
x1,473:23950872,6276382
k1,473:32326942,6276382:8376070
)
)
(1,473:7947550,6800670:24379392,65536,0
h1,473:7947550,6800670:0,0,0
(1,473:7947550,6800670:24379392,65536,0
r1,473:32326942,6800670:24379392,65536,0
)
g1,473:32326942,6800670
g1,473:32326942,6800670
)
]
)
)
]
[1,473:7947550,44647710:24379392,36831232,0
(1,363:7947550,8471838:24379392,449576,148438
x1,363:8561622,8471838
x1,363:9226156,8471838
x1,363:9460774,8471838
x1,363:10287181,8471838
x1,363:10435292,8471838
k1,362:10575192,8471838:139900
x1,362:10809810,8471838
x1,362:11107998,8471838
x1,362:12112007,8471838
x1,362:12973804,8471838
k1,362:13112856,8471838:139052
x1,362:13661392,8471838
k1,362:13800443,8471838:139051
x1,362:14518716,8471838
x1,362:15138030,8471838
k1,362:15277082,8471838:139052
x1,362:16075965,8471838
x1,362:16609427,8471838
x1,362:17273961,8471838
x1,362:18566330,8471838
k1,362:18705382,8471838:139052
x1,362:19480016,8471838
k1,362:19619068,8471838:139052
x1,362:21157197,8471838
k1,362:21296249,8471838:139052
x1,362:21506619,8471838
x1,362:21868377,8471838
k1,362:22007428,8471838:139051
x1,362:23018646,8471838
k1,362:23157698,8471838:139052
x1,362:23839272,8471838
x1,362:24750221,8471838
x1,362:24874084,8471838
k1,362:25013984,8471838:139900
x1,362:25896752,8471838
k1,362:26035804,8471838:139052
x1,362:27507085,8471838
x1,362:28286962,8471838
k1,362:28426013,8471838:139051
x1,362:29721003,8471838
x1,362:30626054,8471838
k1,362:30765106,8471838:139052
x1,362:31305122,8471838
k1,362:31444174,8471838:139052
x1,362:32326942,8471838
k1,362:32326942,8471838:0
)
(1,363:7947550,9258270:24379392,449576,148438
x1,363:9264823,9258270
x1,363:10711200,9258270
g1,362:10846859,9258270
x1,362:12305689,9258270
g1,362:12441348,9258270
x1,362:13489924,9258270
g1,362:13625583,9258270
x1,362:15064751,9258270
g1,362:15200410,9258270
x1,362:16517683,9258270
x1,362:17964060,9258270
g1,362:18099719,9258270
x1,362:18649565,9258270
x1,362:18947753,9258270
g1,362:19083412,9258270
x1,362:20722466,9258270
g1,362:20858125,9258270
x1,362:21413214,9258270
g1,362:21548873,9258270
x1,362:22219306,9258270
g1,362:22354965,9258270
x1,362:24590395,9258270
k1,363:32326942,9258270:7736547
g1,363:32326942,9258270
)
(1,365:7947550,10044702:24379392,449576,135003
h1,364:7947550,10044702:655360,0,0
x1,364:9248439,10044702
k1,364:9399175,10044702:150736
x1,364:9714403,10044702
k1,364:9865139,10044702:150736
x1,364:10099757,10044702
x1,364:11401954,10044702
k1,364:11552690,10044702:150736
x1,364:12435458,10044702
k1,364:12586194,10044702:150736
x1,364:13187158,10044702
x1,364:15178796,10044702
k1,364:15329532,10044702:150736
x1,364:15717505,10044702
x1,364:16731345,10044702
k1,364:16882065,10044702:150720
x1,364:17116683,10044702
x1,364:18547330,10044702
x1,364:19108317,10044702
k1,364:19259053,10044702:150736
x1,364:19574281,10044702
k1,364:19725017,10044702:150736
x1,364:23769894,10044702
k1,364:23920630,10044702:150736
x1,364:25169744,10044702
k1,364:25320480,10044702:150736
x1,364:25860496,10044702
k1,364:26011232,10044702:150736
x1,364:26331047,10044702
k1,364:26481783,10044702:150736
x1,364:26847473,10044702
k1,364:26998209,10044702:150736
x1,364:27772843,10044702
k1,364:27923579,10044702:150736
x1,364:28799794,10044702
x1,364:31015565,10044702
k1,364:31166301,10044702:150736
x1,364:31881953,10044702
x1,364:32326942,10044702
k1,364:32326942,10044702:0
)
(1,365:7947550,10831134:24379392,449576,148438
x1,365:9154066,10831134
k1,364:9341436,10831134:187370
x1,364:11320621,10831134
x1,364:11468732,10831134
k1,364:11669030,10831134:200298
x1,364:14272772,10831134
k1,364:14460142,10831134:187370
x1,364:15342910,10831134
k1,364:15530280,10831134:187370
x1,364:17254530,10831134
x1,364:19027276,10831134
k1,364:19214647,10831134:187371
x1,364:19754663,10831134
k1,364:19942033,10831134:187370
x1,364:21233091,10831134
k1,364:21420409,10831134:187318
x1,364:23258037,10831134
x1,364:23412046,10831134
k1,364:23612344,10831134:200298
x1,364:25634782,10831134
x1,364:26112538,10831134
k1,364:26299908,10831134:187370
x1,364:27256733,10831134
x1,364:29443667,10831134
x1,364:29597676,10831134
k1,364:29797974,10831134:200298
x1,364:30846550,10831134
k1,364:31033920,10831134:187370
x1,364:32326942,10831134
k1,364:32326942,10831134:0
)
(1,365:7947550,11617566:24379392,449576,148438
x1,365:9500751,11617566
x1,364:11073613,11617566
k1,364:11347684,11617566:274071
x1,364:11828718,11617566
x1,364:12158364,11617566
x1,364:12603353,11617566
x1,364:13213492,11617566
x1,364:13754818,11617566
x1,364:13878681,11617566
k1,364:14058358,11617566:179677
x1,364:14441087,11617566
k1,364:14611960,11617566:170873
x1,364:16483010,11617566
k1,364:16653884,11617566:170874
x1,364:17324317,11617566
k1,364:17495190,11617566:170873
x1,364:19093612,11617566
k1,364:19264486,11617566:170874
x1,364:20359590,11617566
k1,364:20530463,11617566:170873
x1,364:20918436,11617566
x1,364:21932276,11617566
k1,364:22103114,11617566:170838
x1,364:23090086,11617566
k1,364:23260960,11617566:170874
x1,364:23931393,11617566
k1,364:24102266,11617566:170873
x1,364:25826516,11617566
x1,364:27373163,11617566
k1,364:27544037,11617566:170874
x1,364:28738757,11617566
k1,364:28909630,11617566:170873
x1,364:30168574,11617566
k1,364:30339448,11617566:170874
x1,364:31717669,11617566
k1,364:31888507,11617566:170838
x1,364:32326942,11617566
k1,364:32326942,11617566:0
)
(1,365:7947550,12403998:24379392,449576,148438
x1,365:9694081,12403998
x1,364:10512625,12403998
k1,364:10839092,12403998:326467
x1,364:11298499,12403998
x1,364:11668122,12403998
k1,364:11856461,12403998:188339
x1,364:12739229,12403998
k1,364:12927568,12403998:188339
x1,364:14389019,12403998
x1,364:14932966,12403998
x1,364:15249504,12403998
x1,364:15358293,12403998
k1,364:15559802,12403998:201509
x1,364:16442570,12403998
k1,364:16630909,12403998:188339
x1,364:17101457,12403998
x1,364:18422660,12403998
x1,364:18647448,12403998
x1,364:18973817,12403998
x1,364:20403154,12403998
k1,364:20591493,12403998:188339
x1,364:21823569,12403998
k1,364:22011855,12403998:188286
x1,364:23390076,12403998
k1,364:23578362,12403998:188286
x1,364:23812980,12403998
x1,364:25243627,12403998
x1,364:25804614,12403998
k1,364:25992953,12403998:188339
x1,364:26632583,12403998
k1,364:26820922,12403998:188339
x1,364:27186612,12403998
k1,364:27374951,12403998:188339
x1,364:27930040,12403998
k1,364:28118379,12403998:188339
x1,364:29885228,12403998
x1,364:30191281,12403998
k1,364:30379620,12403998:188339
x1,364:31262388,12403998
k1,364:31450727,12403998:188339
x1,364:32326942,12403998
k1,365:32326942,12403998:0
)
(1,365:7947550,13190430:24379392,449576,148438
x1,365:10163321,13190430
k1,364:10301475,13190430:138154
x1,364:10841491,13190430
k1,364:10979645,13190430:138154
x1,364:11695297,13190430
x1,364:12140286,13190430
k1,364:12278440,13190430:138154
x1,364:13644864,13190430
k1,364:13783642,13190430:138778
x1,364:15273928,13190430
k1,364:15412082,13190430:138154
x1,364:16294850,13190430
k1,364:16433004,13190430:138154
x1,364:17877416,13190430
k1,364:18015571,13190430:138155
x1,364:19618579,13190430
k1,364:19756733,13190430:138154
x1,364:20638191,13190430
x1,364:20936379,13190430
k1,364:21074533,13190430:138154
x1,364:21614549,13190430
k1,364:21752703,13190430:138154
x1,364:22986744,13190430
[1,364:22986744,13190430:564920,446872,101580
(1,364:22986744,13190430:564920,446872,0
g1,364:22986744,13190430
(1,364:22986744,13190430:564920,446872,0
k1,364:23075218,13190430:88474
(1,364:23075218,13170197:387973,426639,0
x1,364:23463191,13170197
)
k1,364:23551664,13190430:88473
)
g1,364:23551664,13190430
)
(1,364:22986744,13190430:564920,435486,101580
g1,364:22986744,13190430
(1,364:22986744,13190430:564920,435486,101580
x1,364:23551664,13190430
)
g1,364:23551664,13190430
)
]
k1,364:23689818,13190430:138154
x1,364:24421854,13190430
x1,364:26097606,13190430
k1,364:26235758,13190430:138152
x1,364:26836722,13190430
x1,364:28897827,13190430
k1,364:29035981,13190430:138154
x1,364:29558302,13190430
k1,364:29696456,13190430:138154
x1,364:30815809,13190430
k1,364:30953963,13190430:138154
x1,364:32326942,13190430
k1,364:32326942,13190430:0
)
(1,365:7947550,13976862:24379392,449576,148438
x1,365:9232053,13976862
x1,364:10304875,13976862
x1,364:10603063,13976862
x1,364:10751174,13976862
g1,364:10886833,13976862
x1,364:11769601,13976862
g1,364:11905260,13976862
x1,364:15950137,13976862
g1,364:16085796,13976862
x1,364:17334910,13976862
g1,364:17470569,13976862
x1,364:17909004,13976862
g1,364:18044663,13976862
x1,364:18279281,13976862
x1,364:20272884,13976862
g1,364:20408543,13976862
x1,364:20768991,13976862
x1,364:21059314,13976862
g1,364:21194973,13976862
x1,364:22339885,13976862
g1,364:22475544,13976862
x1,364:23250178,13976862
g1,364:23385837,13976862
x1,364:24397055,13976862
g1,364:24532714,13976862
x1,364:26852030,13976862
x1,364:27000141,13976862
k1,365:32326942,13976862:5326801
g1,365:32326942,13976862
)
[1,378:7947550,19488773:24379392,4643277,0
[1,378:7947550,19488773:24379392,4643277,0
(1,368:7947550,16575644:24379392,1336932,235932
h1,368:7947550,16575644:0,0,0
g1,368:7947550,16575644
[1,368:7947550,16575644:24379392,1336932,235932
(1,368:7947550,15789212:24379392,550500,148438
h1,368:7947550,15789212:0,0,0
x1,368:8321760,15789212
x1,368:9415554,15789212
k1,368:9584393,15789212:168839
x1,368:10064116,15789212
k1,368:10298903,15789212:234787
r1,368:10298903,15789212:0,698938,148438
k1,368:10298903,15789212:0
x1,368:10648865,15789212
x1,368:11158079,15789212
x1,368:11603068,15789212
k1,368:11771907,15789212:168839
x1,368:12978423,15789212
k1,368:13147262,15789212:168839
x1,368:14479607,15789212
x1,368:16436510,15789212
k1,368:16605349,15789212:168839
x1,368:17145365,15789212
k1,368:17314204,15789212:168839
x1,368:18196972,15789212
k1,368:18365811,15789212:168839
x1,368:21172058,15789212
k1,368:21340897,15789212:168839
x1,368:23567152,15789212
k1,368:23735991,15789212:168839
x1,368:24284527,15789212
k1,368:24453366,15789212:168839
x1,368:25205062,15789212
x1,368:26028848,15789212
k1,368:26197687,15789212:168839
x1,368:26737703,15789212
k1,368:26906542,15789212:168839
x1,368:27789310,15789212
k1,368:27958149,15789212:168839
x1,368:30158190,15789212
k1,368:30327029,15789212:168839
x1,368:30867045,15789212
k1,368:31035884,15789212:168839
x1,368:32326942,15789212
k1,368:32326942,15789212:0
)
(1,368:7947550,16575644:24379392,449576,235932
x1,368:9785178,16575644
x1,368:9933289,16575644
r1,368:9933289,16575644:0,235932,235932
k1,368:32326941,16575644:22393652
g1,368:32326941,16575644
)
]
g1,368:32326942,16575644
g1,368:32326942,16575644
)
(1,375:7947550,17964354:24379392,1152778,813302
k1,375:9112097,17964354:1164547
h1,371:9112097,17964354:0,0,0
(1,374:9112097,17964354:22050299,1152778,813302
$1,374:9112097,17964354
[1,374:9112097,17964354:22050299,1152778,813302
(1,372:9112097,17362076:22050299,550500,629148
g1,372:9112097,17362076
(1,372:9112097,17362076:7144068,550500,629148
r1,372:9112097,17362076:0,786432,235932
k1,372:9885420,17362076:773323
g1,372:9885421,17362076
x1,372:10331066,17362076
x1,372:10665299,17362076
x1,372:10828483,17362076
g1,372:10985113,17362076
x1,372:11544134,17362076
g1,372:11670618,17362076
x1,372:12994444,17362076
g1,372:13120928,17362076
x1,372:14991322,17362076
k1,372:15764645,17362076:773323
g1,372:16256165,17362076
)
g1,372:16256165,17362076
(1,372:16256165,17362076:2742024,550500,629148
g1,372:16747685,17362076
k1,372:17458422,17362076:710737
g1,372:17458423,17362076
x1,372:17795933,17362076
k1,372:18506669,17362076:710736
g1,372:18998189,17362076
)
g1,372:18998189,17362076
(1,372:18998189,17362076:2422209,550500,629148
g1,372:19489709,17362076
k1,372:20040538,17362076:550829
g1,372:20040539,17362076
x1,372:20378049,17362076
k1,372:20928878,17362076:550829
g1,372:21420398,17362076
)
g1,372:21420398,17362076
(1,372:21420398,17362076:2422209,550500,629148
g1,372:21911918,17362076
k1,372:22462747,17362076:550829
g1,372:22462748,17362076
x1,372:22800258,17362076
k1,372:23351087,17362076:550829
g1,372:23842607,17362076
)
g1,372:23842607,17362076
(1,372:23842607,17362076:2422209,550500,629148
g1,372:24334127,17362076
k1,372:24884956,17362076:550829
g1,372:24884957,17362076
x1,372:25222467,17362076
k1,372:25773296,17362076:550829
g1,372:26264816,17362076
)
g1,372:26264816,17362076
(1,372:26264816,17362076:2694550,550500,629148
g1,372:26756336,17362076
k1,372:27274581,17362076:518245
g1,372:27274582,17362076
x1,372:27949602,17362076
k1,372:28467846,17362076:518244
g1,372:28959366,17362076
)
g1,372:28959366,17362076
(1,372:28959366,17362076:2203030,550500,629148
g1,372:29450886,17362076
k1,372:29969131,17362076:518245
g1,372:29969132,17362076
x1,372:30644152,17362076
r1,372:30644152,17362076:0,1179648,629148
k1,372:31162396,17362076:518244
)
g1,372:31162396,17362076
)
(1,374:9112097,18541724:22050299,550500,235932
g1,373:9112097,18541724
(1,373:9112097,18541724:7144068,550500,235932
r1,373:9112097,18541724:0,786432,235932
g1,373:9112097,18541724
g1,373:9112098,18541724
x1,373:9500071,18541724
x1,373:9784496,18541724
x1,373:11314759,18541724
g1,373:11441243,18541724
x1,373:12828638,18541724
x1,373:15764645,18541724
g1,373:15764645,18541724
g1,373:16256165,18541724
)
g1,373:16256165,18541724
(1,373:16256165,18541724:2742024,550500,235932
g1,373:16747685,18541724
g1,373:16747685,18541724
g1,373:16747686,18541724
x1,373:18506669,18541724
g1,373:18506669,18541724
g1,373:18998189,18541724
)
g1,373:18998189,18541724
(1,373:18998189,18541724:2422209,550500,235932
g1,373:19489709,18541724
g1,373:19489709,18541724
g1,373:19489710,18541724
x1,373:20928878,18541724
g1,373:20928878,18541724
g1,373:21420398,18541724
)
g1,373:21420398,18541724
(1,373:21420398,18541724:2422209,550500,235932
g1,373:21911918,18541724
g1,373:21911918,18541724
g1,373:21911919,18541724
x1,373:23351087,18541724
g1,373:23351087,18541724
g1,373:23842607,18541724
)
g1,373:23842607,18541724
(1,373:23842607,18541724:2422209,550500,235932
g1,373:24334127,18541724
g1,373:24334127,18541724
g1,373:24334128,18541724
x1,373:25773296,18541724
g1,373:25773296,18541724
g1,373:26264816,18541724
)
g1,373:26264816,18541724
(1,373:26264816,18541724:2694550,550500,235932
g1,373:26756336,18541724
g1,373:26756336,18541724
g1,373:26756337,18541724
x1,373:28195505,18541724
$1,373:28195505,18541724
(1,373:28195505,18303829:272341,229611,2489
x1,373:28435078,18303829
)
$1,373:28467846,18541724
g1,373:28467846,18541724
g1,373:28959366,18541724
)
g1,373:28959366,18541724
(1,374:28959366,18541724:2203030,550500,235932
g1,373:29450886,18541724
g1,373:29450886,18541724
g1,373:29450887,18541724
x1,373:30890055,18541724
$1,373:30890055,18541724
(1,373:30890055,18303829:272341,229611,2489
x1,373:31129628,18303829
)
$1,373:31162396,18541724
g1,374:31162396,18541724
)
g1,374:31162396,18541724
)
]
$1,374:31162396,17964354
)
g1,375:31162396,17964354
k1,375:32326942,17964354:1164546
)
(1,377:7947550,19370022:24379392,395758,118751
k1,377:11421139,19370022:3473589
h1,376:11421139,19370022:0,0,0
$1,376:11421139,19370022
(1,376:11421139,19179706:247123,205442,2227
x1,376:11635494,19179706
)
$1,376:11668262,19370022
x1,376:12044176,19370022
x1,376:12578949,19370022
g1,376:12687476,19370022
x1,376:13131548,19370022
g1,376:13240075,19370022
x1,376:13912211,19370022
x1,376:14345272,19370022
x1,376:15626106,19370022
g1,376:15734633,19370022
x1,376:16173462,19370022
g1,376:16281989,19370022
x1,376:16988204,19370022
g1,376:17096731,19370022
x1,376:20054762,19370022
g1,376:20163289,19370022
x1,376:21781241,19370022
x1,376:22163446,19370022
g1,376:22271973,19370022
x1,376:23037433,19370022
x1,376:24786981,19370022
g1,376:24895508,19370022
x1,376:25335385,19370022
x1,376:25573936,19370022
g1,376:25682463,19370022
x1,376:26424855,19370022
g1,376:26533382,19370022
x1,376:27775943,19370022
x1,376:28853353,19370022
g1,377:28853353,19370022
k1,377:32326942,19370022:3473589
)
]
]
[1,404:7947550,30600575:24379392,9671411,0
[1,404:7947550,30600575:24379392,9671411,0
(1,382:7947550,22659312:24379392,1336932,235932
h1,382:7947550,22659312:0,0,0
g1,382:7947550,22659312
[1,382:7947550,22659312:24379392,1336932,235932
(1,382:7947550,21872880:24379392,550500,135003
h1,382:7947550,21872880:0,0,0
x1,382:8321760,21872880
x1,382:9415554,21872880
k1,382:9556008,21872880:140454
x1,382:10035731,21872880
k1,382:10213749,21872880:178018
r1,382:10213749,21872880:0,685503,135003
k1,382:10213749,21872880:0
x1,382:10625970,21872880
x1,382:11523157,21872880
x1,382:12255193,21872880
x1,382:12777514,21872880
x1,382:14364794,21872880
k1,382:14505248,21872880:140454
x1,382:15754362,21872880
k1,382:15894816,21872880:140454
x1,382:16129434,21872880
x1,382:16427622,21872880
x1,382:17560081,21872880
x1,382:18218717,21872880
k1,382:18359171,21872880:140454
x1,382:18907707,21872880
k1,382:19048161,21872880:140454
x1,382:19799857,21872880
x1,382:20623643,21872880
k1,382:20764097,21872880:140454
x1,382:21304113,21872880
k1,382:21444568,21872880:140455
x1,382:22327336,21872880
k1,382:22467790,21872880:140454
x1,382:23762780,21872880
x1,382:24667831,21872880
k1,382:24808285,21872880:140454
x1,382:25348301,21872880
k1,382:25488755,21872880:140454
x1,382:26779813,21872880
k1,382:26920262,21872880:140449
x1,382:28757890,21872880
k1,382:28898345,21872880:140455
x1,382:29672979,21872880
k1,382:29813433,21872880:140454
x1,382:30696201,21872880
k1,382:30836655,21872880:140454
x1,382:31447450,21872880
x1,382:32090357,21872880
x1,382:32326942,21872880
k1,382:32326942,21872880:0
)
(1,382:7947550,22659312:24379392,449576,235932
x1,382:8638298,22659312
x1,382:9500095,22659312
g1,382:9635754,22659312
x1,382:10956958,22659312
x1,382:11862009,22659312
x1,382:11985872,22659312
r1,382:11985872,22659312:0,235932,235932
k1,382:32326942,22659312:20341070
g1,382:32326942,22659312
)
]
g1,382:32326942,22659312
g1,382:32326942,22659312
)
(1,400:7947550,26239783:24379392,3344539,3005063
k1,400:9649204,26239783:1701654
h1,385:9649204,26239783:0,0,0
(1,399:9649204,26239783:20976085,3344539,3005063
$1,399:9649204,26239783
[1,399:9649204,26239783:20976085,3344539,3005063
(1,387:9649204,23445744:20976085,550500,235932
g1,386:9649204,23445744
(1,386:9649204,23445744:2361915,550500,235932
r1,386:9649204,23445744:0,786432,235932
k1,386:9922488,23445744:273284
g1,386:9922489,23445744
x1,386:11246315,23445744
k1,386:11519599,23445744:273284
g1,386:12011119,23445744
)
g1,386:12011119,23445744
(1,386:12011119,23445744:4711378,550500,235932
g1,386:12502639,23445744
k1,386:13050847,23445744:548208
g1,386:13050848,23445744
x1,386:13389013,23445744
x1,386:15682769,23445744
k1,386:16230977,23445744:548208
g1,386:16722497,23445744
)
g1,386:16722497,23445744
(1,386:16722497,23445744:4189712,550500,235932
g1,386:17214017,23445744
k1,386:17291349,23445744:77332
g1,386:17291350,23445744
x1,386:18615176,23445744
g1,386:18741660,23445744
x1,386:20343357,23445744
k1,386:20420689,23445744:77332
g1,386:20912209,23445744
)
g1,386:20912209,23445744
(1,386:20912209,23445744:4208717,550500,235932
g1,386:21403729,23445744
k1,386:21659319,23445744:255590
g1,386:21659320,23445744
x1,386:22035496,23445744
x1,386:24373816,23445744
k1,386:24629406,23445744:255590
g1,386:25120926,23445744
)
g1,386:25120926,23445744
(1,386:25120926,23445744:3253859,550500,235932
g1,386:25612446,23445744
k1,386:26036135,23445744:423689
g1,386:26036136,23445744
x1,386:26448357,23445744
x1,386:27459576,23445744
k1,386:27883265,23445744:423689
g1,386:28374785,23445744
)
g1,386:28374785,23445744
(1,387:28374785,23445744:2250504,550500,235932
g1,386:28866305,23445744
k1,386:29040303,23445744:173998
g1,386:29040304,23445744
x1,386:29416480,23445744
x1,386:30451292,23445744
k1,387:30625289,23445744:173997
)
g1,387:30625289,23445744
)
(1,388:9649204,24232176:20976085,550500,235932
g1,387:9649204,24232176
(1,387:9649204,24232176:2361915,550500,235932
r1,387:9649204,24232176:0,786432,235932
g1,387:9649204,24232176
g1,387:9649205,24232176
x1,387:11519599,24232176
g1,387:11519599,24232176
g1,387:12011119,24232176
)
g1,387:12011119,24232176
(1,387:12011119,24232176:4711378,550500,235932
g1,387:12502639,24232176
g1,387:12502639,24232176
g1,387:12502640,24232176
x1,387:13890035,24232176
x1,387:14399904,24232176
g1,387:14526388,24232176
x1,387:16052719,24232176
x1,387:16230977,24232176
g1,387:16230977,24232176
g1,387:16722497,24232176
)
g1,387:16722497,24232176
(1,387:16722497,24232176:4189712,550500,235932
g1,387:17214017,24232176
g1,387:17214017,24232176
g1,387:17214018,24232176
x1,387:18176740,24232176
x1,387:18589616,24232176
g1,387:18716100,24232176
x1,387:20242431,24232176
x1,387:20420689,24232176
g1,387:20420689,24232176
g1,387:20912209,24232176
)
g1,387:20912209,24232176
(1,387:20912209,24232176:4208717,550500,235932
g1,387:21403729,24232176
g1,387:21403729,24232176
g1,387:21403730,24232176
x1,387:22366452,24232176
x1,387:22779328,24232176
x1,387:22942512,24232176
g1,387:23099142,24232176
x1,387:24466222,24232176
x1,387:24629406,24232176
g1,387:24629406,24232176
g1,387:25120926,24232176
)
g1,387:25120926,24232176
(1,387:25120926,24232176:3253859,550500,235932
g1,387:25612446,24232176
g1,387:25612446,24232176
g1,387:25612447,24232176
x1,387:25877867,24232176
x1,387:27705007,24232176
x1,387:27883265,24232176
g1,387:27883265,24232176
g1,387:28374785,24232176
)
g1,387:28374785,24232176
(1,388:28374785,24232176:2250504,550500,235932
g1,387:28866305,24232176
k1,387:29745797,24232176:879492
k1,388:30625289,24232176:879492
)
g1,388:30625289,24232176
)
(1,394:9649204,25018608:20976085,550500,235932
g1,393:9649204,25018608
(1,393:9649204,25018608:2361915,550500,235932
r1,393:9649204,25018608:0,786432,235932
k1,393:10415646,25018608:766442
g1,393:10415647,25018608
x1,393:10753157,25018608
k1,393:11519599,25018608:766442
g1,393:12011119,25018608
)
g1,393:12011119,25018608
(1,393:12011119,25018608:4711378,550500,235932
g1,393:12502639,25018608
k1,393:13647224,25018608:1144585
g1,393:13647225,25018608
x1,393:15086393,25018608
k1,393:16230977,25018608:1144584
g1,393:16722497,25018608
)
g1,393:16722497,25018608
(1,393:16722497,25018608:4189712,550500,235932
g1,393:17214017,25018608
k1,393:18097769,25018608:883752
g1,393:18097770,25018608
x1,393:19536938,25018608
k1,393:20420689,25018608:883751
g1,393:20912209,25018608
)
g1,393:20912209,25018608
(1,393:20912209,25018608:4208717,550500,235932
g1,393:21403729,25018608
k1,393:22536845,25018608:1133116
g1,393:22536846,25018608
x1,393:23496291,25018608
k1,393:24629406,25018608:1133115
g1,393:25120926,25018608
)
g1,393:25120926,25018608
(1,393:25120926,25018608:3253859,550500,235932
g1,393:25612446,25018608
k1,393:26028271,25018608:415825
g1,393:26028272,25018608
x1,393:27467440,25018608
k1,393:27883265,25018608:415825
g1,393:28374785,25018608
)
g1,393:28374785,25018608
(1,394:28374785,25018608:2250504,550500,235932
g1,393:28866305,25018608
k1,393:29026213,25018608:159908
g1,393:29026214,25018608
x1,393:30465382,25018608
k1,394:30625289,25018608:159907
)
g1,394:30625289,25018608
)
(1,395:9649204,25805040:20976085,550500,235932
g1,394:9649204,25805040
(1,394:9649204,25805040:2361915,550500,235932
r1,394:9649204,25805040:0,786432,235932
k1,394:10415646,25805040:766442
g1,394:10415647,25805040
x1,394:10753157,25805040
k1,394:11519599,25805040:766442
g1,394:12011119,25805040
)
g1,394:12011119,25805040
(1,394:12011119,25805040:4711378,550500,235932
g1,394:12502639,25805040
k1,394:13647224,25805040:1144585
g1,394:13647225,25805040
x1,394:15086393,25805040
k1,394:16230977,25805040:1144584
g1,394:16722497,25805040
)
g1,394:16722497,25805040
(1,394:16722497,25805040:4189712,550500,235932
g1,394:17214017,25805040
k1,394:18097769,25805040:883752
g1,394:18097770,25805040
x1,394:19536938,25805040
k1,394:20420689,25805040:883751
g1,394:20912209,25805040
)
g1,394:20912209,25805040
(1,394:20912209,25805040:4208717,550500,235932
g1,394:21403729,25805040
k1,394:22296983,25805040:893254
g1,394:22296984,25805040
x1,394:23736152,25805040
k1,394:24629406,25805040:893254
g1,394:25120926,25805040
)
g1,394:25120926,25805040
(1,394:25120926,25805040:3253859,550500,235932
g1,394:25612446,25805040
k1,394:26028271,25805040:415825
g1,394:26028272,25805040
x1,394:27467440,25805040
k1,394:27883265,25805040:415825
g1,394:28374785,25805040
)
g1,394:28374785,25805040
(1,395:28374785,25805040:2250504,550500,235932
g1,394:28866305,25805040
k1,394:29026213,25805040:159908
g1,394:29026214,25805040
x1,394:30465382,25805040
k1,395:30625289,25805040:159907
)
g1,395:30625289,25805040
)
(1,396:9649204,26591472:20976085,550500,235932
g1,395:9649204,26591472
(1,395:9649204,26591472:2361915,550500,235932
r1,395:9649204,26591472:0,786432,235932
k1,395:10415646,26591472:766442
g1,395:10415647,26591472
x1,395:10753157,26591472
k1,395:11519599,26591472:766442
g1,395:12011119,26591472
)
g1,395:12011119,26591472
(1,395:12011119,26591472:4711378,550500,235932
g1,395:12502639,26591472
k1,395:13647224,26591472:1144585
g1,395:13647225,26591472
x1,395:15086393,26591472
k1,395:16230977,26591472:1144584
g1,395:16722497,26591472
)
g1,395:16722497,26591472
(1,395:16722497,26591472:4189712,550500,235932
g1,395:17214017,26591472
k1,395:18097769,26591472:883752
g1,395:18097770,26591472
x1,395:19536938,26591472
k1,395:20420689,26591472:883751
g1,395:20912209,26591472
)
g1,395:20912209,26591472
(1,395:20912209,26591472:4208717,550500,235932
g1,395:21403729,26591472
k1,395:22296983,26591472:893254
g1,395:22296984,26591472
x1,395:23736152,26591472
k1,395:24629406,26591472:893254
g1,395:25120926,26591472
)
g1,395:25120926,26591472
(1,395:25120926,26591472:3253859,550500,235932
g1,395:25612446,26591472
k1,395:26028271,26591472:415825
g1,395:26028272,26591472
x1,395:27467440,26591472
k1,395:27883265,26591472:415825
g1,395:28374785,26591472
)
g1,395:28374785,26591472
(1,396:28374785,26591472:2250504,550500,235932
g1,395:28866305,26591472
g1,395:28866305,26591472
g1,395:28866306,26591472
x1,395:30625289,26591472
g1,396:30625289,26591472
)
g1,396:30625289,26591472
)
(1,397:9649204,27377904:20976085,550500,235932
g1,396:9649204,27377904
(1,396:9649204,27377904:2361915,550500,235932
r1,396:9649204,27377904:0,786432,235932
k1,396:10415646,27377904:766442
g1,396:10415647,27377904
x1,396:10753157,27377904
k1,396:11519599,27377904:766442
g1,396:12011119,27377904
)
g1,396:12011119,27377904
(1,396:12011119,27377904:4711378,550500,235932
g1,396:12502639,27377904
k1,396:13647224,27377904:1144585
g1,396:13647225,27377904
x1,396:15086393,27377904
k1,396:16230977,27377904:1144584
g1,396:16722497,27377904
)
g1,396:16722497,27377904
(1,396:16722497,27377904:4189712,550500,235932
g1,396:17214017,27377904
k1,396:18097769,27377904:883752
g1,396:18097770,27377904
x1,396:19536938,27377904
k1,396:20420689,27377904:883751
g1,396:20912209,27377904
)
g1,396:20912209,27377904
(1,396:20912209,27377904:4208717,550500,235932
g1,396:21403729,27377904
k1,396:22296983,27377904:893254
g1,396:22296984,27377904
x1,396:23736152,27377904
k1,396:24629406,27377904:893254
g1,396:25120926,27377904
)
g1,396:25120926,27377904
(1,396:25120926,27377904:3253859,550500,235932
g1,396:25612446,27377904
k1,396:26028271,27377904:415825
g1,396:26028272,27377904
x1,396:27467440,27377904
k1,396:27883265,27377904:415825
g1,396:28374785,27377904
)
g1,396:28374785,27377904
(1,397:28374785,27377904:2250504,550500,235932
g1,396:28866305,27377904
g1,396:28866305,27377904
g1,396:28866306,27377904
x1,396:30625289,27377904
g1,397:30625289,27377904
)
g1,397:30625289,27377904
)
(1,398:9649204,28193409:20976085,579573,235932
g1,397:9649204,28193409
(1,397:9649204,28193409:2361915,579573,235932
r1,397:9649204,28193409:0,786432,235932
k1,397:10246891,28193409:597687
g1,397:10246892,28193409
x1,397:10921912,28193409
k1,397:11519599,28193409:597687
g1,397:12011119,28193409
)
g1,397:12011119,28193409
(1,397:12011119,28193409:4711378,579573,235932
g1,397:12502639,28193409
k1,397:13647224,28193409:1144585
g1,397:13647225,28193409
x1,397:15086393,28193409
k1,397:16230977,28193409:1144584
g1,397:16722497,28193409
)
g1,397:16722497,28193409
(1,397:16722497,28193409:4189712,579573,235932
g1,397:17214017,28193409
k1,397:18097769,28193409:883752
g1,397:18097770,28193409
x1,397:19536938,28193409
k1,397:20420689,28193409:883751
g1,397:20912209,28193409
)
g1,397:20912209,28193409
(1,397:20912209,28193409:4208717,579573,235932
g1,397:21403729,28193409
k1,397:22315149,28193409:911420
g1,397:22315150,28193409
x1,397:23445645,28193409
$1,397:23445645,28193409
(1,397:23445645,27955514:272341,229611,2489
x1,397:23685218,27955514
)
$1,397:23717986,28193409
k1,397:24629406,28193409:911420
g1,397:25120926,28193409
)
g1,397:25120926,28193409
(1,397:25120926,28193409:3253859,579573,235932
g1,397:25612446,28193409
k1,397:26028271,28193409:415825
g1,397:26028272,28193409
x1,397:27467440,28193409
k1,397:27883265,28193409:415825
g1,397:28374785,28193409
)
g1,397:28374785,28193409
(1,398:28374785,28193409:2250504,579573,235932
g1,397:28866305,28193409
k1,397:28872859,28193409:6554
g1,397:28872860,28193409
x1,397:30312028,28193409
$1,397:30312028,28193409
(1,397:30312028,27955514:306708,341678,2489
x1,397:30585968,27955514
)
$1,397:30618736,28193409
k1,398:30625289,28193409:6553
)
g1,398:30625289,28193409
)
(1,399:9649204,29008914:20976085,579573,235932
g1,398:9649204,29008914
(1,398:9649204,29008914:2361915,579573,235932
r1,398:9649204,29008914:0,786432,235932
k1,398:10246891,29008914:597687
g1,398:10246892,29008914
x1,398:10921912,29008914
k1,398:11519599,29008914:597687
g1,398:12011119,29008914
)
g1,398:12011119,29008914
(1,398:12011119,29008914:4711378,579573,235932
g1,398:12502639,29008914
k1,398:13647224,29008914:1144585
g1,398:13647225,29008914
x1,398:15086393,29008914
k1,398:16230977,29008914:1144584
g1,398:16722497,29008914
)
g1,398:16722497,29008914
(1,398:16722497,29008914:4189712,579573,235932
g1,398:17214017,29008914
k1,398:18097769,29008914:883752
g1,398:18097770,29008914
x1,398:19536938,29008914
k1,398:20420689,29008914:883751
g1,398:20912209,29008914
)
g1,398:20912209,29008914
(1,398:20912209,29008914:4208717,579573,235932
g1,398:21403729,29008914
k1,398:22315149,29008914:911420
g1,398:22315150,29008914
x1,398:23445645,29008914
$1,398:23445645,29008914
(1,398:23445645,28771019:272341,229611,2489
x1,398:23685218,28771019
)
$1,398:23717986,29008914
k1,398:24629406,29008914:911420
g1,398:25120926,29008914
)
g1,398:25120926,29008914
(1,398:25120926,29008914:3253859,579573,235932
g1,398:25612446,29008914
k1,398:26028271,29008914:415825
g1,398:26028272,29008914
x1,398:27467440,29008914
k1,398:27883265,29008914:415825
g1,398:28374785,29008914
)
g1,398:28374785,29008914
(1,399:28374785,29008914:2250504,579573,235932
g1,398:28866305,29008914
k1,398:28872859,29008914:6554
g1,398:28872860,29008914
x1,398:30312028,29008914
$1,398:30312028,29008914
(1,398:30312028,28771019:306708,341678,2489
x1,398:30585968,28771019
)
$1,398:30618736,29008914
k1,399:30625289,29008914:6553
)
g1,399:30625289,29008914
)
]
$1,399:30625289,26239783
)
g1,400:30625289,26239783
k1,400:32326942,26239783:1701653
)
(1,401:7947550,29837212:24379392,395758,118751
k1,401:11421139,29837212:3473589
h1,401:11421139,29837212:0,0,0
$1,401:11421139,29837212
(1,401:11421139,29646896:247123,205442,2227
x1,401:11635494,29646896
)
$1,401:11668262,29837212
x1,401:12044176,29837212
x1,401:12578949,29837212
g1,401:12687476,29837212
x1,401:13131548,29837212
g1,401:13240075,29837212
x1,401:13912211,29837212
x1,401:14345272,29837212
x1,401:15626106,29837212
g1,401:15734633,29837212
x1,401:16173462,29837212
g1,401:16281989,29837212
x1,401:16988204,29837212
g1,401:17096731,29837212
x1,401:20054762,29837212
g1,401:20163289,29837212
x1,401:21781241,29837212
x1,401:22163446,29837212
g1,401:22271973,29837212
x1,401:23037433,29837212
x1,401:24786981,29837212
g1,401:24895508,29837212
x1,401:25335385,29837212
x1,401:25573936,29837212
g1,401:25682463,29837212
x1,401:26424855,29837212
g1,401:26533382,29837212
x1,401:27775943,29837212
x1,401:28853353,29837212
g1,401:28853353,29837212
k1,401:32326942,29837212:3473589
)
(1,403:7947550,30492572:24379392,496028,108003
k1,403:13538828,30492572:5591278
h1,402:13538828,30492572:0,0,0
$1,402:13538828,30492572
(1,402:13538828,30302256:277872,305712,2227
x1,402:13783932,30302256
)
$1,402:13816700,30492572
x1,402:14116068,30492572
x1,402:14898829,30492572
g1,402:15007356,30492572
x1,402:16681930,30492572
g1,402:16790457,30492572
x1,402:17789749,30492572
g1,402:17898276,30492572
x1,402:19604307,30492572
g1,402:19712834,30492572
x1,402:21330786,30492572
x1,402:21712991,30492572
g1,402:21821518,30492572
x1,402:22586978,30492572
x1,402:24126287,30492572
g1,402:24234814,30492572
x1,402:25477375,30492572
x1,402:26735665,30492572
g1,403:26735665,30492572
k1,403:32326942,30492572:5591277
)
]
]
[1,431:7947550,38332423:24379392,6291456,0
[1,431:7947550,38332423:24379392,6291456,0
(1,408:7947550,33771115:24379392,1336932,235932
h1,408:7947550,33771115:0,0,0
g1,408:7947550,33771115
[1,408:7947550,33771115:24379392,1336932,235932
(1,408:7947550,32984683:24379392,550500,148438
h1,408:7947550,32984683:0,0,0
x1,408:8321760,32984683
x1,408:9415554,32984683
k1,408:9578943,32984683:163389
x1,408:10058666,32984683
k1,408:10282552,32984683:223886
r1,408:10282552,32984683:0,698938,148438
k1,408:10282552,32984683:0
x1,408:10694773,32984683
x1,408:14433597,32984683
k1,408:14596986,32984683:163389
x1,408:15846100,32984683
k1,408:16009489,32984683:163389
x1,408:17058065,32984683
k1,408:17221454,32984683:163389
x1,408:17840768,32984683
x1,408:18382094,32984683
x1,408:19314669,32984683
k1,408:19478057,32984683:163388
x1,408:20810402,32984683
x1,408:22767305,32984683
k1,408:22930694,32984683:163389
x1,408:23470710,32984683
k1,408:23634099,32984683:163389
x1,408:24516867,32984683
k1,408:24680256,32984683:163389
x1,408:27486503,32984683
k1,408:27649891,32984683:163388
x1,408:29876146,32984683
k1,408:30039535,32984683:163389
x1,408:30588071,32984683
k1,408:30751460,32984683:163389
x1,408:31503156,32984683
x1,408:32326942,32984683
k1,408:32326942,32984683:0
)
(1,408:7947550,33771115:24379392,449576,235932
x1,408:8487566,33771115
g1,408:8623225,33771115
x1,408:9505993,33771115
g1,408:9641652,33771115
x1,408:11841693,33771115
g1,408:11977352,33771115
x1,408:12517368,33771115
g1,408:12653027,33771115
x1,408:15416677,33771115
x1,408:15564788,33771115
r1,408:15564788,33771115:0,235932,235932
k1,408:32326942,33771115:16762154
g1,408:32326942,33771115
)
]
g1,408:32326942,33771115
g1,408:32326942,33771115
)
(1,420:7947550,36339473:24379392,2332426,1992950
g1,420:7947550,36339473
h1,412:7947550,36339473:0,0,0
(1,419:7947550,36339473:26105582,2332426,1992950
$1,419:7947550,36339473
[1,419:7947550,36339473:26105582,2332426,1992950
(1,414:7947550,34557547:26105582,550500,235932
g1,413:7947550,34557547
(1,413:7947550,34557547:3123442,550500,235932
r1,413:7947550,34557547:0,786432,235932
g1,413:7947550,34557547
g1,413:7947551,34557547
x1,413:8285716,34557547
x1,413:10579472,34557547
g1,413:10579472,34557547
g1,413:11070992,34557547
)
g1,413:11070992,34557547
(1,413:11070992,34557547:4711378,550500,235932
g1,413:11562512,34557547
k1,413:12110720,34557547:548208
g1,413:12110721,34557547
x1,413:12448886,34557547
x1,413:14742642,34557547
k1,413:15290850,34557547:548208
g1,413:15782370,34557547
)
g1,413:15782370,34557547
(1,413:15782370,34557547:4189712,550500,235932
g1,413:16273890,34557547
k1,413:16351222,34557547:77332
g1,413:16351223,34557547
x1,413:17675049,34557547
g1,413:17801533,34557547
x1,413:19403230,34557547
k1,413:19480562,34557547:77332
g1,413:19972082,34557547
)
g1,413:19972082,34557547
(1,413:19972082,34557547:4208717,550500,235932
g1,413:20463602,34557547
k1,413:20719192,34557547:255590
g1,413:20719193,34557547
x1,413:21095369,34557547
x1,413:23433689,34557547
k1,413:23689279,34557547:255590
g1,413:24180799,34557547
)
g1,413:24180799,34557547
(1,413:24180799,34557547:3253859,550500,235932
g1,413:24672319,34557547
k1,413:25096008,34557547:423689
g1,413:25096009,34557547
x1,413:25508230,34557547
x1,413:26519449,34557547
k1,413:26943138,34557547:423689
g1,413:27434658,34557547
)
g1,413:27434658,34557547
(1,413:27434658,34557547:2742024,550500,235932
g1,413:27926178,34557547
k1,413:28100176,34557547:173998
g1,413:28100177,34557547
x1,413:28476353,34557547
x1,413:29511165,34557547
k1,413:29685162,34557547:173997
g1,413:30176682,34557547
)
g1,413:30176682,34557547
(1,414:30176682,34557547:3876450,550500,235932
g1,413:30668202,34557547
k1,413:31259336,34557547:591134
g1,413:31259337,34557547
x1,413:31647310,34557547
x1,413:31931735,34557547
x1,413:33461998,34557547
k1,414:34053132,34557547:591134
)
g1,414:34053132,34557547
)
(1,414:7947550,35343979:26105582,550500,629148
g1,414:7947550,35343979
(1,414:7947550,35343979:3123442,550500,629148
r1,414:7947550,35343979:0,786432,235932
k1,414:8791980,35343979:844430
g1,414:8791981,35343979
x1,414:9237626,35343979
x1,414:9571859,35343979
x1,414:9735043,35343979
k1,414:10579472,35343979:844429
g1,414:11070992,35343979
)
g1,414:11070992,35343979
(1,414:11070992,35343979:4711378,550500,629148
g1,414:11562512,35343979
g1,414:11562512,35343979
g1,414:11562513,35343979
x1,414:12949908,35343979
x1,414:13459777,35343979
g1,414:13586261,35343979
x1,414:15112592,35343979
x1,414:15290850,35343979
g1,414:15290850,35343979
g1,414:15782370,35343979
)
g1,414:15782370,35343979
(1,414:15782370,35343979:4189712,550500,629148
g1,414:16273890,35343979
g1,414:16273890,35343979
g1,414:16273891,35343979
x1,414:17236613,35343979
x1,414:17649489,35343979
g1,414:17775973,35343979
x1,414:19302304,35343979
x1,414:19480562,35343979
g1,414:19480562,35343979
g1,414:19972082,35343979
)
g1,414:19972082,35343979
(1,414:19972082,35343979:4208717,550500,629148
g1,414:20463602,35343979
g1,414:20463602,35343979
g1,414:20463603,35343979
x1,414:21426325,35343979
x1,414:21839201,35343979
x1,414:22002385,35343979
g1,414:22159015,35343979
x1,414:23526095,35343979
x1,414:23689279,35343979
g1,414:23689279,35343979
g1,414:24180799,35343979
)
g1,414:24180799,35343979
(1,414:24180799,35343979:3253859,550500,629148
g1,414:24672319,35343979
g1,414:24672319,35343979
g1,414:24672320,35343979
x1,414:24937740,35343979
x1,414:26764880,35343979
x1,414:26943138,35343979
g1,414:26943138,35343979
g1,414:27434658,35343979
)
g1,414:27434658,35343979
(1,414:27434658,35343979:2742024,550500,629148
g1,414:27926178,35343979
k1,414:28805670,35343979:879492
k1,414:29685162,35343979:879492
g1,414:30176682,35343979
)
g1,414:30176682,35343979
(1,414:30176682,35343979:3876450,550500,629148
g1,414:30668202,35343979
g1,414:30668202,35343979
g1,414:30668203,35343979
x1,414:32055598,35343979
x1,414:34053132,35343979
r1,414:34053132,35343979:0,1179648,629148
g1,414:34053132,35343979
)
g1,414:34053132,35343979
)
(1,417:7947550,36523627:26105582,550500,235932
g1,416:7947550,36523627
(1,416:7947550,36523627:3123442,550500,235932
r1,416:7947550,36523627:0,786432,235932
k1,416:8503949,36523627:556399
g1,416:8503950,36523627
x1,416:10023073,36523627
k1,416:10579472,36523627:556399
g1,416:11070992,36523627
)
g1,416:11070992,36523627
(1,416:11070992,36523627:4711378,550500,235932
g1,416:11562512,36523627
k1,416:12946958,36523627:1384446
g1,416:12946959,36523627
x1,416:13906404,36523627
k1,416:15290850,36523627:1384446
g1,416:15782370,36523627
)
g1,416:15782370,36523627
(1,416:15782370,36523627:4189712,550500,235932
g1,416:16273890,36523627
k1,416:17557411,36523627:1283521
g1,416:17557412,36523627
x1,416:18197042,36523627
k1,416:19480562,36523627:1283520
g1,416:19972082,36523627
)
g1,416:19972082,36523627
(1,416:19972082,36523627:4208717,550500,235932
g1,416:20463602,36523627
k1,416:21356856,36523627:893254
g1,416:21356857,36523627
x1,416:22796025,36523627
k1,416:23689279,36523627:893254
g1,416:24180799,36523627
)
g1,416:24180799,36523627
(1,416:24180799,36523627:3253859,550500,235932
g1,416:24672319,36523627
k1,416:25328006,36523627:655687
g1,416:25328007,36523627
x1,416:26287452,36523627
k1,416:26943138,36523627:655686
g1,416:27434658,36523627
)
g1,416:27434658,36523627
(1,416:27434658,36523627:2742024,550500,235932
g1,416:27926178,36523627
k1,416:28086086,36523627:159908
g1,416:28086087,36523627
x1,416:29525255,36523627
k1,416:29685162,36523627:159907
g1,416:30176682,36523627
)
g1,416:30176682,36523627
(1,417:30176682,36523627:3876450,550500,235932
g1,416:30668202,36523627
k1,416:31641083,36523627:972881
g1,416:31641084,36523627
x1,416:33080252,36523627
k1,417:34053132,36523627:972880
)
g1,417:34053132,36523627
)
(1,418:7947550,37310059:26105582,550500,235932
g1,417:7947550,37310059
(1,417:7947550,37310059:3123442,550500,235932
r1,417:7947550,37310059:0,786432,235932
k1,417:8503949,37310059:556399
g1,417:8503950,37310059
x1,417:10023073,37310059
k1,417:10579472,37310059:556399
g1,417:11070992,37310059
)
g1,417:11070992,37310059
(1,417:11070992,37310059:4711378,550500,235932
g1,417:11562512,37310059
k1,417:12946958,37310059:1384446
g1,417:12946959,37310059
x1,417:13906404,37310059
k1,417:15290850,37310059:1384446
g1,417:15782370,37310059
)
g1,417:15782370,37310059
(1,417:15782370,37310059:4189712,550500,235932
g1,417:16273890,37310059
k1,417:17397503,37310059:1123613
g1,417:17397504,37310059
x1,417:18356949,37310059
k1,417:19480562,37310059:1123613
g1,417:19972082,37310059
)
g1,417:19972082,37310059
(1,417:19972082,37310059:4208717,550500,235932
g1,417:20463602,37310059
k1,417:21356856,37310059:893254
g1,417:21356857,37310059
x1,417:22796025,37310059
k1,417:23689279,37310059:893254
g1,417:24180799,37310059
)
g1,417:24180799,37310059
(1,417:24180799,37310059:3253859,550500,235932
g1,417:24672319,37310059
k1,417:25088144,37310059:415825
g1,417:25088145,37310059
x1,417:26527313,37310059
k1,417:26943138,37310059:415825
g1,417:27434658,37310059
)
g1,417:27434658,37310059
(1,417:27434658,37310059:2742024,550500,235932
g1,417:27926178,37310059
k1,417:28086086,37310059:159908
g1,417:28086087,37310059
x1,417:29525255,37310059
k1,417:29685162,37310059:159907
g1,417:30176682,37310059
)
g1,417:30176682,37310059
(1,418:30176682,37310059:3876450,550500,235932
g1,417:30668202,37310059
k1,417:31641083,37310059:972881
g1,417:31641084,37310059
x1,417:33080252,37310059
k1,418:34053132,37310059:972880
)
g1,418:34053132,37310059
)
(1,419:7947550,38096491:26105582,550500,235932
g1,418:7947550,38096491
(1,418:7947550,38096491:3123442,550500,235932
r1,418:7947550,38096491:0,786432,235932
k1,418:8503949,38096491:556399
g1,418:8503950,38096491
x1,418:10023073,38096491
k1,418:10579472,38096491:556399
g1,418:11070992,38096491
)
g1,418:11070992,38096491
(1,418:11070992,38096491:4711378,550500,235932
g1,418:11562512,38096491
k1,418:12707097,38096491:1144585
g1,418:12707098,38096491
x1,418:14146266,38096491
k1,418:15290850,38096491:1144584
g1,418:15782370,38096491
)
g1,418:15782370,38096491
(1,418:15782370,38096491:4189712,550500,235932
g1,418:16273890,38096491
k1,418:17157642,38096491:883752
g1,418:17157643,38096491
x1,418:18596811,38096491
k1,418:19480562,38096491:883751
g1,418:19972082,38096491
)
g1,418:19972082,38096491
(1,418:19972082,38096491:4208717,550500,235932
g1,418:20463602,38096491
k1,418:21356856,38096491:893254
g1,418:21356857,38096491
x1,418:22796025,38096491
k1,418:23689279,38096491:893254
g1,418:24180799,38096491
)
g1,418:24180799,38096491
(1,418:24180799,38096491:3253859,550500,235932
g1,418:24672319,38096491
k1,418:25088144,38096491:415825
g1,418:25088145,38096491
x1,418:26527313,38096491
k1,418:26943138,38096491:415825
g1,418:27434658,38096491
)
g1,418:27434658,38096491
(1,418:27434658,38096491:2742024,550500,235932
g1,418:27926178,38096491
g1,418:27926178,38096491
g1,418:27926179,38096491
x1,418:29685162,38096491
g1,418:29685162,38096491
g1,418:30176682,38096491
)
g1,418:30176682,38096491
(1,419:30176682,38096491:3876450,550500,235932
g1,418:30668202,38096491
k1,418:31641083,38096491:972881
g1,418:31641084,38096491
x1,418:33080252,38096491
k1,419:34053132,38096491:972880
)
g1,419:34053132,38096491
)
]
$1,419:34053132,36339473
)
g1,420:34053132,36339473
g1,420:34053132,36339473
)
]
]
(1,469:7947550,40836792:24379392,489581,12716
(1,469:7947550,40836792:1264944,473853,12716
g1,469:7947550,40836792
x1,469:8877852,40836792
)
x1,469:10216418,40836792
x1,469:10727080,40836792
g1,469:10913140,40836792
x1,469:12289185,40836792
g1,469:12475245,40836792
x1,469:17160893,40836792
g1,469:17346953,40836792
x1,469:18128006,40836792
g1,469:18314066,40836792
x1,469:19355469,40836792
x1,469:20123135,40836792
k1,469:26225039,40836792:6101904
k1,469:32326942,40836792:6101903
)
(1,471:7947550,41967288:24379392,466809,137841
(1,471:7947550,41967288:1738328,451813,12124
g1,471:7947550,41967288
x1,471:9366801,41967288
)
x1,471:13196358,41967288
g1,471:13373764,41967288
x1,471:13976181,41967288
g1,471:14153587,41967288
x1,471:15110817,41967288
g1,471:15288223,41967288
x1,471:16565167,41967288
x1,471:17797439,41967288
k1,471:25062191,41967288:7264752
k1,471:32326942,41967288:7264751
)
(1,473:7947550,43074846:24379392,449576,148438
x1,473:9125885,43074846
k1,472:9305561,43074846:179676
x1,472:10177189,43074846
x1,472:11280814,43074846
k1,472:11460489,43074846:179675
x1,472:12061453,43074846
x1,472:13775217,43074846
k1,472:13954893,43074846:179676
x1,472:14837661,43074846
k1,472:15017336,43074846:179675
x1,472:16189119,43074846
x1,472:17195750,43074846
k1,472:17375426,43074846:179676
x1,472:17915442,43074846
k1,472:18095117,43074846:179675
x1,472:18410345,43074846
k1,472:18590021,43074846:179676
x1,472:19443299,43074846
x1,472:20223831,43074846
k1,472:20403462,43074846:179631
x1,472:21682722,43074846
k1,472:21862398,43074846:179676
x1,472:22353262,43074846
x1,472:22587880,43074846
x1,472:23476546,43074846
k1,472:23656221,43074846:179675
x1,472:24394811,43074846
x1,472:25065244,43074846
x1,472:25299862,43074846
x1,472:25957187,43074846
x1,472:26818984,43074846
k1,472:26998660,43074846:179676
x1,472:27341413,43074846
x1,472:27742492,43074846
x1,472:28197967,43074846
x1,472:28321830,43074846
k1,472:28501505,43074846:179675
x1,472:29551390,43074846
k1,472:29731066,43074846:179676
x1,472:30354312,43074846
x1,472:31258708,43074846
x1,472:31568693,43074846
x1,472:32010404,43074846
x1,472:32326942,43074846
k1,472:32326942,43074846:0
)
(1,473:7947550,43861278:24379392,449576,12123
x1,473:8996126,43861278
k1,472:9133972,43861278:137846
x1,472:10113734,43861278
x1,472:10348352,43861278
x1,472:10956525,43861278
x1,472:11473603,43861278
x1,472:11708221,43861278
x1,472:12151243,43861278
x1,472:13095615,43861278
k1,472:13233462,43861278:137847
x1,472:13773478,43861278
k1,472:13911324,43861278:137846
x1,472:14794092,43861278
k1,472:14931938,43861278:137846
x1,472:15422802,43861278
x1,472:15657420,43861278
x1,472:16546086,43861278
k1,472:16683932,43861278:137846
x1,472:17233778,43861278
x1,472:17531966,43861278
k1,472:17669813,43861278:137847
x1,472:18934657,43861278
x1,472:19110293,43861278
x1,472:20148382,43861278
k1,472:20286228,43861278:137846
x1,472:20712866,43861278
x1,472:21613330,43861278
k1,472:21751176,43861278:137846
x1,472:22633944,43861278
k1,472:22771791,43861278:137847
x1,472:24144114,43861278
k1,472:24281960,43861278:137846
x1,472:25227643,43861278
x1,472:26078955,43861278
k1,472:26216801,43861278:137846
x1,472:27203771,43861278
k1,472:27341617,43861278:137846
x1,472:28390193,43861278
k1,472:28528040,43861278:137847
x1,472:29410808,43861278
k1,472:29548654,43861278:137846
x1,472:30780730,43861278
k1,472:30918574,43861278:137844
x1,472:32090357,43861278
x1,472:32326942,43861278
k1,473:32326942,43861278:0
)
(1,473:7947550,44647710:24379392,562141,148438
x1,473:9088530,44647710
k1,472:9237295,44647710:148765
x1,472:10257035,44647710
x1,472:12159543,44647710
k1,472:12308307,44647710:148764
x1,472:12668755,44647710
x1,472:12959078,44647710
k1,472:13107843,44647710:148765
x1,472:13469601,44647710
x1,472:14209501,44647710
x1,472:14836024,44647710
k1,472:14988065,44647710:152041
x1,472:15556917,44647710
x1,472:17255606,44647710
x1,472:17379469,44647710
k1,472:17531510,44647710:152041
x1,472:17919483,44647710
x1,472:18638412,44647710
x1,472:19903256,44647710
k1,472:20055297,44647710:152041
x1,472:21103873,44647710
k1,472:21252637,44647710:148764
x1,472:21607187,44647710
x1,472:22628236,44647710
k1,472:22777001,44647710:148765
x1,472:23294079,44647710
k1,472:23442843,44647710:148764
x1,472:24086406,44647710
$1,472:24151942,44647710
(1,472:24151942,44409815:4120956,324246,64500
x1,472:24312321,44409815
(1,472:24312321,44409815:243060,306813,2489
x1,472:24555381,44409815
)
x1,472:24676911,44409815
(1,472:24676911,44409815:243060,306813,2489
x1,472:24919971,44409815
)
x1,472:25041501,44409815
(1,472:25041501,44409815:243060,306813,2489
x1,472:25284561,44409815
)
x1,472:25406091,44409815
(1,472:25406091,44409815:243060,306813,2489
x1,472:25649151,44409815
)
x1,472:25770681,44409815
(1,472:25770681,44409815:486120,306813,2489
x1,472:26256801,44409815
)
x1,472:26378331,44409815
(1,472:26378331,44409815:486120,306813,0
x1,472:26864451,44409815
)
x1,472:26985981,44409815
(1,472:26985981,44409815:486120,306813,0
x1,472:27472101,44409815
)
x1,472:27593631,44409815
(1,472:27593631,44409815:486120,306813,2489
x1,472:28079751,44409815
)
x1,472:28240130,44409815
)
$1,472:28272898,44647710
k1,472:28421663,44647710:148765
x1,472:29471548,44647710
k1,472:29620312,44647710:148764
x1,472:30111176,44647710
x1,472:30345794,44647710
x1,472:31234460,44647710
k1,472:31383225,44647710:148765
x1,472:32326942,44647710
k1,472:32326942,44647710:0
)
]
(1,473:7947550,46613790:24379392,0,0
h1,473:7947550,46613790:24379392,0,0
)
]
]
!50086
}12
!11
{13
[1,473:4736286,46613790:27525120,41877504,0
[1,473:7882014,46613790:24379392,41222144,0
[1,473:7882014,6178078:24379392,786432,0
(1,473:7882014,6800670:24379392,1409024,0
(1,473:7882014,6800670:24379392,1409024,0
[1,473:7882014,6800670:24379392,1409024,0
(1,473:7882014,5457182:24379392,65536,0
h1,473:7882014,5457182:0,0,0
(1,473:7882014,5457182:24379392,65536,0
r1,473:32261406,5457182:24379392,65536,0
)
g1,473:32261406,5457182
g1,473:32261406,5457182
)
(1,473:7882014,6276382:24379392,395657,55410
x1,473:8856344,6276382
g1,473:8985220,6276382
x1,473:9609667,6276382
g1,473:9738543,6276382
x1,473:10534811,6276382
k1,473:11834980,6276382:1300169
x1,473:13184733,6276382
g1,473:13313609,6276382
x1,473:15536222,6276382
g1,473:15665098,6276382
x1,473:16694845,6276382
x1,473:17664206,6276382
x1,473:19121654,6276382
g1,473:19250530,6276382
x1,473:20646977,6276382
x1,473:21664252,6276382
g1,473:21793128,6276382
x1,473:22627375,6276382
g1,473:22756251,6276382
x1,473:23457276,6276382
x1,473:27827790,6276382
g1,473:27956666,6276382
x1,473:28356357,6276382
x1,473:29381746,6276382
g1,473:29510622,6276382
x1,473:29693657,6276382
x1,473:29953893,6276382
x1,473:30214129,6276382
k1,473:31591498,6276382:1300168
x1,473:32261406,6276382
)
(1,473:7882014,6800670:24379392,65536,0
h1,473:7882014,6800670:0,0,0
(1,473:7882014,6800670:24379392,65536,0
r1,473:32261406,6800670:24379392,65536,0
)
g1,473:32261406,6800670
g1,473:32261406,6800670
)
]
)
)
]
[1,473:7882014,44647710:24379392,36831232,0
[1,467:7882014,43079979:24379392,33695769,0
[1,467:7882014,43079979:24379392,33695769,0
(1,446:7882014,19959160:24379392,10574950,0
k1,446:9033229,19959160:1151215
h1,438:9033229,19959160:0,0,0
[1,441:9033229,19959160:10970652,10574950,0
(1,440:9033229,18451832:10970652,9067622,0
h1,439:9033229,18451832:0,0,0
(1,439:9033229,18451832:10970652,9067622,0
(1,439:9033229,18451832:10970730,9067644,0
(1,439:9033229,18451832:10970730,9067644,0
(1,439:9033229,18451832:0,9067644,0
(1,439:9033229,18451832:0,23977452,0
(1,439:9033229,18451832:29009756,23977452,0
)
k1,439:9033229,18451832:-29009756
)
)
g1,439:20003959,18451832
)
)
)
g1,440:20003881,18451832
g1,440:20003881,18451832
)
(1,440:9033229,19349673:10970652,504625,216271
h1,440:9033229,19349673:0,0,0
g1,440:9033229,19349673
[1,440:9033229,19349673:10970652,504625,216271
(1,440:9033229,19349673:10970652,504625,216271
k1,440:12431172,19349673:3397943
h1,440:12431172,19349673:0,0,0
x1,440:13094723,19349673
g1,440:13216816,19349673
r1,440:13216816,19349673:0,720896,216271
g1,440:13216816,19349673
x1,440:13565991,19349673
x1,440:14622364,19349673
g1,440:14744457,19349673
x1,440:16247327,19349673
g1,440:16369420,19349673
x1,440:16605939,19349673
r1,440:16605939,19349673:0,216271,216271
g1,440:16605939,19349673
k1,440:20003881,19349673:3397942
)
]
g1,440:20003881,19349673
g1,440:20003881,19349673
)
]
g1,441:20139540,19959160
[1,445:20139540,19959160:10970652,10402297,0
(1,444:20139540,18451832:10970652,8894969,0
h1,443:20139540,18451832:0,0,0
(1,443:20139540,18451832:10970652,8894969,0
(1,443:20139540,18451832:10970489,8894991,0
(1,443:20139540,18451832:10970489,8894991,0
(1,443:20139540,18451832:0,8894991,0
(1,443:20139540,18451832:0,23681434,0
(1,443:20139540,18451832:29207101,23681434,0
)
k1,443:20139541,18451832:-29207100
)
)
g1,443:31110029,18451832
)
)
)
g1,444:31110192,18451832
g1,444:31110192,18451832
)
(1,444:20139540,19349673:10970652,504625,216271
h1,444:20139540,19349673:0,0,0
g1,444:20139540,19349673
[1,444:20139540,19349673:10970652,504625,216271
(1,444:20139540,19349673:10970652,504625,216271
k1,444:23527750,19349673:3388210
h1,444:23527750,19349673:0,0,0
x1,444:24231999,19349673
g1,444:24354092,19349673
r1,444:24354092,19349673:0,720896,216271
g1,444:24354092,19349673
x1,444:25738408,19349673
g1,444:25860501,19349673
x1,444:27363371,19349673
g1,444:27485464,19349673
x1,444:27721983,19349673
r1,444:27721983,19349673:0,216271,216271
g1,444:27721983,19349673
k1,444:31110192,19349673:3388209
)
]
g1,444:31110192,19349673
g1,444:31110192,19349673
)
]
g1,446:31110192,19959160
k1,446:32261406,19959160:1151214
)
(1,455:7882014,31295804:24379392,11271108,0
k1,455:9033229,31295804:1151215
h1,447:9033229,31295804:0,0,0
[1,450:9033229,31295804:10970652,11271108,0
(1,449:9033229,29788476:10970652,9763780,0
h1,448:9033229,29788476:0,0,0
(1,448:9033229,29788476:10970652,9763780,0
(1,448:9033229,29788476:10970287,9763804,0
(1,448:9033229,29788476:10970287,9763804,0
(1,448:9033229,29788476:0,9763804,0
(1,448:9033229,29788476:0,38729011,0
(1,448:9033229,29788476:43514634,38729011,0
)
k1,448:9033231,29788476:-43514632
)
)
g1,448:20003516,29788476
)
)
)
g1,449:20003881,29788476
g1,449:20003881,29788476
)
(1,449:9033229,30686317:10970652,504625,216271
h1,449:9033229,30686317:0,0,0
g1,449:9033229,30686317
[1,449:9033229,30686317:10970652,504625,216271
(1,449:9033229,30686317:10970652,504625,216271
k1,449:12510503,30686317:3477274
h1,449:12510503,30686317:0,0,0
x1,449:13159308,30686317
g1,449:13281401,30686317
r1,449:13281401,30686317:0,720896,216271
g1,449:13281401,30686317
x1,449:13630576,30686317
x1,449:14686949,30686317
g1,449:14809042,30686317
x1,449:16167995,30686317
g1,449:16290088,30686317
x1,449:16526607,30686317
r1,449:16526607,30686317:0,216271,216271
g1,449:16526607,30686317
k1,449:20003881,30686317:3477274
)
]
g1,449:20003881,30686317
g1,449:20003881,30686317
)
]
g1,450:20139540,31295804
[1,454:20139540,31295804:10970652,11271108,0
(1,453:20139540,29788476:10970652,9763780,0
h1,452:20139540,29788476:0,0,0
(1,452:20139540,29788476:10970652,9763780,0
(1,452:20139540,29788476:10970287,9763804,0
(1,452:20139540,29788476:10970287,9763804,0
(1,452:20139540,29788476:0,9763804,0
(1,452:20139540,29788476:0,38729011,0
(1,452:20139540,29788476:43514634,38729011,0
)
k1,452:20139542,29788476:-43514632
)
)
g1,452:31109827,29788476
)
)
)
g1,453:31110192,29788476
g1,453:31110192,29788476
)
(1,453:20139540,30686317:10970652,504625,216271
h1,453:20139540,30686317:0,0,0
g1,453:20139540,30686317
[1,453:20139540,30686317:10970652,504625,216271
(1,453:20139540,30686317:10970652,504625,216271
k1,453:23599708,30686317:3460168
h1,453:23599708,30686317:0,0,0
x1,453:24303957,30686317
g1,453:24426050,30686317
r1,453:24426050,30686317:0,720896,216271
g1,453:24426050,30686317
x1,453:25810366,30686317
g1,453:25932459,30686317
x1,453:27291412,30686317
g1,453:27413505,30686317
x1,453:27650024,30686317
r1,453:27650024,30686317:0,216271,216271
g1,453:27650024,30686317
k1,453:31110192,30686317:3460168
)
]
g1,453:31110192,30686317
g1,453:31110192,30686317
)
]
g1,455:31110192,31295804
k1,455:32261406,31295804:1151214
)
(1,464:7882014,41900331:24379392,10538991,0
k1,464:9033229,41900331:1151215
h1,456:9033229,41900331:0,0,0
[1,459:9033229,41900331:10970652,10538991,0
(1,458:9033229,40393003:10970652,9031663,0
h1,457:9033229,40393003:0,0,0
(1,457:9033229,40393003:10970652,9031663,0
(1,457:9033229,40393003:10970509,9031685,0
(1,457:9033229,40393003:10970509,9031685,0
(1,457:9033229,40393003:0,9031685,0
(1,457:9033229,40393003:0,27579003,0
(1,457:9033229,40393003:33499361,27579003,0
)
k1,457:9033230,40393003:-33499360
)
)
g1,457:20003738,40393003
)
)
)
g1,458:20003881,40393003
g1,458:20003881,40393003
)
(1,458:9033229,41290844:10970652,504625,216271
h1,458:9033229,41290844:0,0,0
g1,458:9033229,41290844
[1,458:9033229,41290844:10970652,504625,216271
(1,458:9033229,41290844:10970652,504625,216271
k1,458:12433531,41290844:3400302
h1,458:12433531,41290844:0,0,0
x1,458:13092363,41290844
g1,458:13214456,41290844
r1,458:13214456,41290844:0,720896,216271
g1,458:13214456,41290844
x1,458:13563631,41290844
x1,458:14620004,41290844
g1,458:14742097,41290844
x1,458:16244967,41290844
g1,458:16367060,41290844
x1,458:16603579,41290844
r1,458:16603579,41290844:0,216271,216271
g1,458:16603579,41290844
k1,458:20003881,41290844:3400302
)
]
g1,458:20003881,41290844
g1,458:20003881,41290844
)
]
g1,459:20139540,41900331
[1,463:20139540,41900331:10970652,10517308,0
(1,462:20139540,40393003:10970652,9009980,0
h1,461:20139540,40393003:0,0,0
(1,461:20139540,40393003:10970652,9009980,0
(1,461:20139540,40393003:10970813,9010003,0
(1,461:20139540,40393003:10970813,9010003,0
(1,461:20139540,40393003:0,9010003,0
(1,461:20139540,40393003:0,27430994,0
(1,461:20139540,40393003:33400689,27430994,0
)
k1,461:20139541,40393003:-33400688
)
)
g1,461:31110353,40393003
)
)
)
g1,462:31110192,40393003
g1,462:31110192,40393003
)
(1,462:20139540,41290844:10970652,504625,216271
h1,462:20139540,41290844:0,0,0
g1,462:20139540,41290844
[1,462:20139540,41290844:10970652,504625,216271
(1,462:20139540,41290844:10970652,504625,216271
k1,462:23576411,41290844:3436871
h1,462:23576411,41290844:0,0,0
x1,462:23939152,41290844
x1,462:24183338,41290844
g1,462:24305431,41290844
r1,462:24305431,41290844:0,720896,216271
g1,462:24305431,41290844
x1,462:25689747,41290844
g1,462:25811840,41290844
x1,462:27314710,41290844
g1,462:27436803,41290844
x1,462:27673322,41290844
r1,462:27673322,41290844:0,216271,216271
g1,462:27673322,41290844
k1,462:31110192,41290844:3436870
)
]
g1,462:31110192,41290844
g1,462:31110192,41290844
)
]
g1,464:31110192,41900331
k1,464:32261406,41900331:1151214
)
(1,465:7882014,42450831:24379392,550500,235932
h1,465:7882014,42450831:0,0,0
g1,465:7882014,42450831
[1,465:7882014,42450831:24379392,550500,235932
(1,465:7882014,42450831:24379392,550500,235932
k1,465:8121897,42450831:239883
h1,465:8121897,42450831:0,0,0
x1,465:8471859,42450831
x1,465:9555165,42450831
x1,465:9853353,42450831
g1,465:9989012,42450831
x1,465:10468735,42450831
g1,465:10637162,42450831
r1,465:10637162,42450831:0,786432,235932
g1,465:10637162,42450831
x1,465:11331187,42450831
x1,465:12856862,42450831
g1,465:12992521,42450831
x1,465:14041097,42450831
g1,465:14176756,42450831
x1,465:14411374,42450831
x1,465:16433812,42450831
x1,465:17980459,42450831
g1,465:18116118,42450831
x1,465:19064422,42450831
x1,465:19534314,42450831
x1,465:20942026,42450831
g1,465:21077685,42450831
x1,465:22347115,42450831
g1,465:22482774,42450831
x1,465:22786860,42450831
x1,465:24596961,42450831
g1,465:24732620,42450831
x1,465:27170556,42450831
g1,465:27306215,42450831
x1,465:28796501,42450831
g1,465:28932160,42450831
x1,465:30459803,42450831
x1,465:30847776,42450831
x1,465:32021524,42450831
r1,465:32021524,42450831:0,235932,235932
g1,465:32021524,42450831
k1,465:32261406,42450831:239882
)
]
g1,465:32261406,42450831
g1,465:32261406,42450831
)
]
]
]
(1,473:7882014,46613790:24379392,0,0
h1,473:7882014,46613790:24379392,0,0
)
]
]
!10495
}13
!11
{14
[1,500:4736286,46613790:27590656,41877504,0
[1,500:7947550,46613790:24379392,41222144,0
[1,500:7947550,6178078:24379392,786432,0
(1,500:7947550,6800670:24379392,1409024,0
(1,500:7947550,6800670:24379392,1409024,0
[1,500:7947550,6800670:24379392,1409024,0
(1,500:7947550,5457182:24379392,65536,0
h1,500:7947550,5457182:0,0,0
(1,500:7947550,5457182:24379392,65536,0
r1,500:32326942,5457182:24379392,65536,0
)
g1,500:32326942,5457182
g1,500:32326942,5457182
)
(1,500:7947550,6276382:24379392,395657,0
x1,500:8617458,6276382
k1,500:32326942,6276382:23709484
)
(1,500:7947550,6276382:24379392,395657,68796
(1,500:7947550,6276382:24379392,395657,68796
k1,500:16323621,6276382:8376071
x1,500:17415634,6276382
g1,500:17544510,6276382
x1,500:18574257,6276382
x1,500:19653817,6276382
x1,500:21488556,6276382
g1,500:21617432,6276382
x1,500:23950872,6276382
k1,500:32326942,6276382:8376070
)
)
(1,500:7947550,6800670:24379392,65536,0
h1,500:7947550,6800670:0,0,0
(1,500:7947550,6800670:24379392,65536,0
r1,500:32326942,6800670:24379392,65536,0
)
g1,500:32326942,6800670
g1,500:32326942,6800670
)
]
)
)
]
[1,500:7947550,44647710:24379392,36831232,0
[1,479:7947550,13785393:24379392,5968915,0
[1,479:7947550,13785393:24379392,5968915,0
(1,477:7947550,12605745:24379392,4789267,0
k1,477:11604496,12605745:3656946
h1,476:11604496,12605745:0,0,0
(1,476:11604496,12605745:17065500,4789267,0
(1,476:11604496,12605745:17065729,4789279,0
(1,476:11604496,12605745:17065729,4789279,0
(1,476:11604496,12605745:0,4789279,0
(1,476:11604496,12605745:0,11298017,0
(1,476:11604496,12605745:40258437,11298017,0
)
k1,476:11604497,12605745:-40258436
)
)
g1,476:28670225,12605745
)
)
)
g1,477:28669996,12605745
k1,477:32326942,12605745:3656946
)
(1,477:7947550,13156245:24379392,550500,235932
h1,477:7947550,13156245:0,0,0
g1,477:7947550,13156245
[1,477:7947550,13156245:24379392,550500,235932
(1,477:7947550,13156245:24379392,550500,235932
k1,477:14439884,13156245:6492334
h1,477:14439884,13156245:0,0,0
x1,477:14789846,13156245
x1,477:15873152,13156245
x1,477:16171340,13156245
g1,477:16306999,13156245
x1,477:16786722,13156245
g1,477:16955149,13156245
r1,477:16955149,13156245:0,786432,235932
g1,477:16955149,13156245
x1,477:19201065,13156245
g1,477:19336724,13156245
x1,477:21996173,13156245
g1,477:22131832,13156245
x1,477:22906466,13156245
g1,477:23042125,13156245
x1,477:23924893,13156245
g1,477:24060552,13156245
x1,477:24786034,13156245
x1,477:25834608,13156245
r1,477:25834608,13156245:0,235932,235932
g1,477:25834608,13156245
k1,477:32326942,13156245:6492334
)
]
g1,477:32326942,13156245
g1,477:32326942,13156245
)
]
]
[1,488:7947550,24447964:24379392,8730409,0
[1,488:7947550,24447964:24379392,8730409,0
(1,486:7947550,23268316:24379392,7550761,0
k1,486:11604496,23268316:3656946
h1,485:11604496,23268316:0,0,0
(1,485:11604496,23268316:17065500,7550761,0
(1,485:11604496,23268316:17065440,7550780,0
(1,485:11604496,23268316:17065440,7550780,0
(1,485:11604496,23268316:0,7550780,0
(1,485:11604496,23268316:0,22003999,0
(1,485:11604496,23268316:49731011,22003999,0
)
k1,485:11604495,23268316:-49731012
)
)
g1,485:28669936,23268316
)
)
)
g1,486:28669996,23268316
k1,486:32326942,23268316:3656946
)
(1,486:7947550,23818816:24379392,550500,235932
h1,486:7947550,23818816:0,0,0
g1,486:7947550,23818816
[1,486:7947550,23818816:24379392,550500,235932
(1,486:7947550,23818816:24379392,550500,235932
k1,486:13700968,23818816:5753418
h1,486:13700968,23818816:0,0,0
x1,486:14050930,23818816
x1,486:15134236,23818816
x1,486:15432424,23818816
g1,486:15568083,23818816
x1,486:16047806,23818816
g1,486:16216233,23818816
r1,486:16216233,23818816:0,786432,235932
g1,486:16216233,23818816
x1,486:16686126,23818816
x1,486:17654091,23818816
x1,486:20043530,23818816
g1,486:20179189,23818816
x1,486:22969708,23818816
g1,486:23105367,23818816
x1,486:23645383,23818816
g1,486:23781042,23818816
x1,486:24663810,23818816
g1,486:24799469,23818816
x1,486:25524951,23818816
x1,486:26573525,23818816
r1,486:26573525,23818816:0,235932,235932
g1,486:26573525,23818816
k1,486:32326942,23818816:5753417
)
]
g1,486:32326942,23818816
g1,486:32326942,23818816
)
]
]
(1,473:7947550,27559773:24379392,449576,148438
x1,473:9194698,27559773
x1,472:9543349,27559773
k1,472:9697576,27559773:154227
x1,472:11434932,27559773
k1,472:11589158,27559773:154226
x1,472:12129174,27559773
k1,472:12283401,27559773:154227
x1,472:14278969,27559773
k1,472:14433195,27559773:154226
x1,472:15481771,27559773
k1,472:15635998,27559773:154227
x1,472:16074433,27559773
k1,472:16228660,27559773:154227
x1,472:17248400,27559773
x1,472:17952910,27559773
x1,472:19481208,27559773
k1,472:19635434,27559773:154226
x1,472:20183970,27559773
k1,472:20338197,27559773:154227
x1,472:20990279,27559773
k1,472:21144505,27559773:154226
x1,472:21680589,27559773
x1,472:21915207,27559773
x1,472:22512239,27559773
x1,472:23878663,27559773
x1,472:24032672,27559773
k1,472:24191541,27559773:158869
x1,472:24501526,27559773
x1,472:24794471,27559773
x1,472:25969530,27559773
k1,472:26123757,27559773:154227
x1,472:26898391,27559773
k1,472:27052617,27559773:154226
x1,472:27935385,27559773
k1,472:28089612,27559773:154227
x1,472:29503221,27559773
k1,472:29657447,27559773:154226
x1,472:30521210,27559773
x1,472:31387594,27559773
k1,472:31541821,27559773:154227
x1,472:32090357,27559773
x1,472:32326942,27559773
k1,473:32326942,27559773:0
)
(1,473:7947550,28346205:24379392,449576,148438
x1,473:9140959,28346205
x1,473:10002756,28346205
k1,472:10130050,28346205:127294
x1,472:11728472,28346205
x1,472:12750177,28346205
k1,472:12915816,28346205:165639
x1,472:13965701,28346205
k1,472:14092996,28346205:127295
x1,472:14583860,28346205
x1,472:14818478,28346205
x1,472:15707144,28346205
k1,472:15834438,28346205:127294
x1,472:16276149,28346205
x1,472:16585478,28346205
x1,472:16889564,28346205
x1,472:17627498,28346205
k1,472:17754792,28346205:127294
x1,472:18277113,28346205
k1,472:18404407,28346205:127294
x1,472:18719635,28346205
k1,472:18846930,28346205:127295
x1,472:19866670,28346205
x1,472:21231783,28346205
k1,472:21359077,28346205:127294
x1,472:22968640,28346205
k1,472:23095934,28346205:127294
x1,472:23635950,28346205
k1,472:23763245,28346205:127295
x1,472:24402875,28346205
k1,472:24530169,28346205:127294
x1,472:25626585,28346205
k1,472:25753879,28346205:127294
x1,472:26802455,28346205
k1,472:26929749,28346205:127294
x1,472:27317722,28346205
x1,472:29433877,28346205
k1,472:29561172,28346205:127295
x1,472:30856162,28346205
x1,472:31761213,28346205
k1,472:31888507,28346205:127294
x1,472:32326942,28346205
k1,472:32326942,28346205:0
)
(1,473:7947550,29132637:24379392,449576,148438
x1,473:8629124,29132637
x1,473:9230088,29132637
x1,473:9574152,29132637
x1,473:9855955,29132637
x1,473:10031591,29132637
x1,473:11894121,29132637
g1,472:12029780,29132637
x1,472:14268486,29132637
g1,472:14436913,29132637
x1,472:15486798,29132637
g1,472:15622457,29132637
x1,472:15966520,29132637
x1,472:16763436,29132637
x1,472:17205147,29132637
x1,472:17514476,29132637
x1,472:18618101,29132637
g1,472:18753760,29132637
x1,472:19293776,29132637
g1,472:19429435,29132637
x1,472:20312203,29132637
g1,472:20447862,29132637
x1,472:21112396,29132637
x1,472:21581632,29132637
x1,472:22459813,29132637
g1,472:22595472,29132637
x1,472:24107385,29132637
g1,472:24243044,29132637
x1,472:24681479,29132637
g1,472:24817138,29132637
x1,472:25487571,29132637
x1,472:27205923,29132637
g1,472:27341582,29132637
x1,472:27890118,29132637
g1,472:28025777,29132637
x1,472:28375739,29132637
x1,472:29018645,29132637
g1,472:29187072,29132637
x1,472:29506887,29132637
h1,472:29506887,29132637:0,0,0
k1,473:32326942,29132637:2820055
g1,473:32326942,29132637
)
(1,482:7947550,30491934:24379392,449576,148438
h1,481:7947550,30491934:655360,0,0
x1,481:9652795,30491934
k1,481:9865144,30491934:212349
x1,481:10356008,30491934
x1,481:10590626,30491934
x1,481:11479292,30491934
k1,481:11691640,30491934:212348
x1,481:12130075,30491934
k1,481:12342424,30491934:212349
x1,481:13030552,30491934
x1,481:13345780,30491934
x1,481:14109273,30491934
x1,481:14775774,30491934
k1,481:14988122,30491934:212348
x1,481:15616611,30491934
x1,481:16478408,30491934
k1,481:16690757,30491934:212349
x1,481:17239293,30491934
x1,481:18442533,30491934
x1,481:19043497,30491934
x1,481:19867283,30491934
x1,481:20881779,30491934
k1,481:21094128,30491934:212349
x1,481:21564676,30491934
x1,481:22885879,30491934
x1,481:23110667,30491934
x1,481:23437036,30491934
x1,481:24866373,30491934
k1,481:25078721,30491934:212348
x1,481:26310797,30491934
x1,481:26440558,30491934
k1,481:26652907,30491934:212349
x1,481:27112314,30491934
x1,481:28157613,30491934
x1,481:28966982,30491934
x1,481:29907422,30491934
k1,481:30119693,30491934:212271
x1,481:30481451,30491934
x1,481:31256741,30491934
x1,481:32326942,30491934
k1,481:32326942,30491934:0
)
(1,482:7947550,31278366:24379392,544708,148438
x1,482:8307998,31278366
x1,482:10332403,31278366
k1,481:10490783,31278366:158380
x1,481:11038662,31278366
x1,481:11579333,31278366
k1,481:11737714,31278366:158381
x1,481:12821022,31278366
x1,481:13362348,31278366
x1,481:13486211,31278366
k1,481:13722802,31278366:236591
x1,481:14772687,31278366
k1,481:14931068,31278366:158381
x1,481:15809904,31278366
x1,481:15985540,31278366
x1,481:16768039,31278366
k1,481:16926419,31278366:158380
x1,481:18175533,31278366
k1,481:18333914,31278366:158381
x1,481:19480137,31278366
k1,481:19638517,31278366:158380
x1,481:19873135,31278366
x1,481:21441409,31278366
k1,481:21599789,31278366:158380
x1,481:22026427,31278366
x1,481:22926891,31278366
k1,481:23085272,31278366:158381
x1,481:23405087,31278366
$1,481:23405087,31278366
x1,481:24478565,31278366
(1,481:24478565,31040471:605552,306813,2489
x1,481:25051349,31040471
)
$1,481:25084117,31278366
k1,481:25242497,31278366:158380
x1,481:25797586,31278366
k1,481:25955967,31278366:158381
x1,481:26275782,31278366
$1,481:26275782,31278366
x1,481:27349260,31278366
(1,481:27349260,31040471:605552,306813,2489
x1,481:27922044,31040471
)
$1,481:27954812,31278366
k1,481:28113192,31278366:158380
x1,481:28984820,31278366
x1,481:30328963,31278366
x1,481:30477074,31278366
k1,481:30713666,31278366:236592
x1,481:30924036,31278366
x1,481:31285794,31278366
k1,481:31444174,31278366:158380
x1,481:32326942,31278366
k1,481:32326942,31278366:0
)
(1,482:7947550,32064798:24379392,449576,148438
x1,482:9150790,32064798
x1,482:9882826,32064798
x1,482:10405147,32064798
x1,482:11668680,32064798
k1,481:11780951,32064798:112271
x1,481:12889164,32064798
x1,481:13768000,32064798
x1,481:14414839,32064798
x1,481:14755626,32064798
x1,481:15224862,32064798
x1,481:15821894,32064798
x1,481:17150306,32064798
k1,481:17256730,32064798:106424
x1,481:17806576,32064798
x1,481:18104764,32064798
k1,481:18211188,32064798:106424
x1,481:18991065,32064798
k1,481:19097489,32064798:106424
x1,481:19652578,32064798
k1,481:19759001,32064798:106423
x1,481:20878354,32064798
k1,481:20990626,32064798:112272
x1,481:22051653,32064798
x1,481:22392440,32064798
x1,481:22861676,32064798
x1,481:23458708,32064798
x1,481:24787120,32064798
k1,481:24893543,32064798:106423
x1,481:25443389,32064798
x1,481:25741577,32064798
k1,481:25848001,32064798:106424
x1,481:26627878,32064798
k1,481:26734302,32064798:106424
x1,481:27289391,32064798
k1,481:27395815,32064798:106424
x1,481:27875538,32064798
k1,481:27987809,32064798:112271
x1,481:29107163,32064798
x1,481:30503734,32064798
x1,481:31742361,32064798
x1,481:32090357,32064798
x1,481:32326942,32064798
k1,482:32326942,32064798:0
)
(1,482:7947550,32851230:24379392,449576,12123
x1,482:8804105,32851230
[truncated: 234,404 more chars]
